# Supplementary material for: Genome-Wide Identification, Characterization, and Regulation of RWP-RK Gene Family in the Nitrogen-Fixing Clade
Source: MDPI journal article supplement (doi:10.3390/plants9091178), 2020-09-11
Supplement: s1 [file s1]

>Alnus\_glutinosa\_Alngl764535691

MEDGVLPVPTMLDTLLDTATDFDFMDELFSGDCWLETTDGSEFLNQIPSSSGALLDPLLLWPALETNGSLSASP  
SQKGNQDETRRSPDESQERSLVNATSLGQNTITLAGCRSVSENNVIEGSEPGTRLWIAPRGNPGSTSSVTERFI  
KAIGYIREVTIDKDVLIQIWWPVYKGGRRILTTINQPSIGSSCPSIARYREISESFVSAEKDSKYLVGLPGRVYLDK  
VPEWTPDVRFFRSDEYPRVNHAQQYDICGTALPIFEQGSRTCLGVIEVVMTRHIKYHPELESVCKALEAVDLR  
STDALSTEHVKQASDKIYQAALPEILEVLRSACETHRLPLAQTWVPCIQQGKEGCRHSDDNYLDCVSTVDHACI  
VADHNMQGFHEACSEHLLRGQGLVGRAFGTNQPCFSTDIRSFVKTEYPLAHHARVFGRLAAVAIHLRSIHTG  
TADFVLEFFLPVDCTDPEEQKKMLSSLSVIVQQVCQGLRVVTDNELKEDSNLPVNGKPSGGELHEKSSEIWQH  
QHDSNLKRNAEFGEECSAYDEGSSPSLDMGIAGEKKRTKAECTITLEVLKQYFAGSLKDAARSIGVCPTTLKRICR  
HHGIKRWPSRKIKKVGHSLLKLQGVDSVQVGASGTLQIKSFYTNFPELASQNLAGTSPFSASKLSDHPQPSSMQ  
PEGGILNPQAAASKSPSSSCTQSSSSGTLQHPSTWNVAGFDDPMVGENLGDGVLKRVGSEAEQASSQGN  
LLARSWSHKSLNEHPNAESLRPLRKNSGWLSQEGNTLKVKVTYGDEKVRFRMQNTWKHKDLLLEIARRFNID  
DVSRLFYLDLDDAEWILLTCDLLEECIDVCRSLQNTIKLCLQVSHYHLS

>Alnus\_glutinosa\_Alngl4587530137

MASQTLNGWWSKHDLVYTDDDPFVLFPTempsLDLSGYSSLDWQYDLPIQESFLDAVPLTESFPTDPLSAPVDI  
LQPTTSVYLPFSFRLTEQSLHCIAGDIFCGYGVWNEIGGGFEAENQALVLCNNGKKGMKEARVEGKMKRSREE  
RCSSTSSLLSKKAISQYFYMPITQAAKELNVGLTLLKRSRELGIIRRWPHRKLMSLQTLIRNVKELGREGEESEAK  
LRDALEILEREKKMLEEFPDLQLEDNTKRLRQACFKANYKRRRLMGMESLSCSSSNRGSVDDVMANDQRMDE  
EEEEEEEEKSLLDSFSSSSSIML

>Alnus\_glutinosa\_Alngl6212505326

MADPSAIVPYHDPYDGPLAENILTFMDDANPTLADVSYPTLPPSEFDPLQDPVTWDICNESNNEAGTSQAG  
LSEVRAGTRNTEGPYFESQSARDWNMRPLSVWPVAPIPYNCSQQVLREIYTNGTITKKLEIHGRLGMICHAIL  
QNLQNVNVNSSSNQYQMFDFCKKSIEDVKQFLVNYCVEQKLAGYVMVQDPLAIFYEALCVGLDWDEDPLPDD  
FFQLSPTNSEGARQMVMDDPDAENERERTPRVSLAAQGHGCRARSTAARGRVGQKARCCALRVAARGSSDR  
RFLDVSRLSGRSMQRRCKRDDRTTGSMSGSSAAARECGYDEGVEETDSNFKSVRRLQRRERAGKLTINEVGRYF  
HLPIEEAARRMKLCPTVLKKICRRYGMNRWPHRKVKSIQRQISSLTASLDSNNAEARANAQAEIDRLQQLTNV  
CAGVVSRGSPEEHNYALRSARPD

>Alnus\_glutinosa\_Alngl7222505734

MENSVSFDGTRNLNLEDNFSELMNYDNYAVWCRSPGATDQIFTSYGLSSDPSMPYGLSLDAFNTEQNTGAF  
PVNEIGGTNFPIGTSFSPGDKMMVQQMDTQDGFPMDFNIANELADAQNNGLSQQNNVLDMENSIPRPLS  
SPVEEKMLKALSFKDSSGAGILAQVWVPRRLGDQYLLTTCQPYLLDHILTYREVSRSTFPKERTGYLGLP  
GRVFTSKVPEWTSNVGYKKVEYLRVEHAVNHEVRGSIALPVFDSPGMSCCAVLELVTTKEKMNFDAMEIVC  
NALEAVNLRTPPPRLRTQYLSKNQKAVLAEIIDVLRAVCHAHRLPLALTWIPSCYTKGDGDEITGVRVRESNAN  
SGEKYILCIEETACYVNDRTMKGfVRACLEHHLEEGQGVAGKALQSNHPFFFPDVKSyDISEYPLVHHARKFGLN  
AAVSIRLRSTYTGDDDYILEFFLPVNMSGSEQQLLNNLPGMTQRMCKSLRTVSDAELCGAEGSKVGFEKGGI  
QNFLPMAMSRNRNSQMTLSDSDVNSTKMLPNVSNKNDGFEADSPHEQVFFLIATSGSGRQEKKRSTAEKNV  
SLSVLQQYFSGSLKDAASIGVCPTTLKRICRQHGISRWPSRKINKVNRSLRKIQTVLDSVEGVDGGLKFDPATGE  
FVATDSVIQESDSQKCLLSKNKLCVKNVKPVNEHAVSVSPVPGIDGLSSLIKLDADDCFMGGNQVGLSSSKLIT  
NACGVELEKSRVSLIDSSDSTLVAINAPWSPENASFGSSLANRGEKWGLNNDWKLQNPDSHFVPRSSGSL  
ATADEMDSRVGGDDGIGERTQRTSSSLTSSNASRSTMPGSSSSMSLEEEKHSKFKSSCADSGSKIIVKATYGE  
DTIRFKFEPSVGCFLYEEVAKRFKMQNGTFQLKYLDDEDEWVMLVSDSLQECLEILDDAGARSVKFLVRDKP  
CTISSGSSNCFLPVGS

>Alnus\_glutinosa\_Alngl10019512742

MDSNSTHLNIPKIENPHGFDWFPEEQSEKRTLFCLFSVLGSFCRLLELPPLDSFFDFDSTLPFLHNTKQFGVTEFQ

DFEDPDSDFFWAESKLPFLYEDVVVDQKPLNSTTEFDTIGHNYGNLGSDTSESSMVVLSEYASSSSRSEEERRSTS  
GRKKSAALELDEIQRHFNPITKAAKEMNVGLTVLKKRCRELNIMRWPHRRIKSLKSLINNVKELGLTNEVVMLE  
EHKRLEILPDMQLTQRTKKLRQACFKANYKKRRSLTIQA

>Alnus\_glutinosa\_AlnGI10067S12813

MNPNTNTASPNHSLSFDHISNYFALPLNDAASN LGVCTSVLKKICRDNGLDRWPYRKFMMSGKSIEEIKRNAARE  
RYKELAEVSKIGRESGSQQPNSDMSKSQGATLAHNLQQGSKNIQNVRPQNLLGTSLTKGITILDEFKYGYPAD  
GLSTASNKWWGSSGPDGCEHVFGDGAETNENEKQQSEKMOVADSSDMVTVDKEKHEGGKEGCKIASQGMG  
GLASVRKRSMEEGREALKLGVFRGYGINTIGKRERTLLLRIFKSSLPKRWIYGSSY

>Alnus\_glutinosa\_AlnGI26612S40027

MAESEEKSTEEEEEEEEEEGVEALIMDFDNLDDSWSDQILLSDNNIDNISHNPMSPLSDQLFSPPWAF  
DGNDDAVHATSAPPDSSPLSCEFHVYTWQCFNQICNEGRQNALAEILGILTVCETHKLPLAQTWVPCRHS  
VLAQGGGLKKSCTSFDDGGCMGQVCLSTTDVALYVVDAMCGFREACVEHHLQKDQGVAGRAFSSHSLCFCE  
NITLFCKTEYPLVHYARMFGLASCFALCLRSTHTGDDYIVEFFLPSPITDFYEQRILLGSLLATMKQHFQSLKVASG  
IELEDEVSVIEIIVSTNERVDSRLESQIPLSMKSPRPDGLLNKGDDVVQLESSKQQLVHLNDINDKGTIANNVG  
ESVDHFSSLENKEIRKTSERKRKTEKSLSEVLQYFAGSLKDAAKSLGVCPTTMKRICRQHGISRWPSRKINKV  
NRSCLCKLHVIESVQGAEGAFDLNSLTTSPLAVAVDSQPSSLNRSNPQKSPSKLSEPQKKNESPTGITLKNNEQA  
GMEVLLQGRRKLSPKNLIRDSSPPELVGRSNNRSKTRSGSREESAGTPTSHGSCQGSPPDGSTRAKHLYISSINE  
QCNKVGGCPDLAYQPPGAPNISATYLIPDALLMTEPQETFGGMLIEDAGSSKDLRNLCPVADAMLDEQVPEF  
CWTNPPCPSLAPNQSMATLAHTMPHVTAKKEMNSVTIKATFRKVIIRFRLSLSSGILELKEEVAKRLKLEIGTFGIK  
YLDDDNEWVLIACDSDLQECIDISRSSASNVLRLLVQDVMANLGSSCESYGE

>Alnus\_glutinosa\_AlnGI46270S10821

MASQTLNGWWSKHDLVYTDDDPFVLFPTEMPLDLGYSLLDWQYDLPIQESFLDAVPLTESFPTDPLSAPVDI  
LQPTTSVIQGDIFCGYGVWNEIGGGFEAENQALVLCNNGKKGMKEARVEGKMKRSREERCSSTSLLSKKAISQ  
YFYMPITQAAKELNVGLTLLKKRSRELGIRRWPHRKLMSLQTLIRNVKELGREGEESEAKLRDALEILEREKKML  
EEFPDLQLEDNTRKLRQACFKANYKRRRLMGMESSCSSNRSVDDVMANDQRMDEEEEEEEEEESLLLD  
SFSSSSSIML

>Alnus\_glutinosa\_AlnGI55731S32319

MIFQLGCKMDGNPTKETCQQSDDTYHQSTKSMPALHQDLNCLPYPVAMSESEDQQKEHCSPGIAESKKKRA  
ASEHIARIALPDALAKYFDLPIVEASRNKLVGLTVLKKKREFGIARWPHRRIKSLDSLIQDLQEEAKRQQQENEA  
AMAVAKRQRMLESEKENIERKPFIELKTETRRFRQDVFKRRHRARAHNRHGPSV

>Alnus\_glutinosa\_AlnGI424567S27630

MEIERKLMNMEYGTASFTAPNSATYGNFSPTDHTAAMEMDFMDELLLEGCWLETTRALNDPSPYYLPTLDSNI  
NHHQQIYQEDQTVGVFPESETIIVEGTELGRWWIGPRANPGPSSSVKERLMLAVGYLRECTKNMNVLLQLW  
VPVRRGGSRYFLTSQDQPYRNVCRAVQFAVEEDMEESGGLPGRVFMGKLPDQWTPPDVRRFFKRDEYPRINY  
AQQYDVRGSLALPVFERGSGTCLGVVEIVTTTQKINYRPELEHVCQALEAVDLRSSQYFSPPGIKACHDELYPAAL  
AEIIEVLATVCKTHRLPLALTWAPCYQQGKGGRQYSDENYAQCLSIVDTACFVADVVDLGFHEACSEHHLFRG  
QGTVGTAFTTAKPCFASDITAFSKTEYPLSHHARMFGLRAAVAIPLRSIYTGSAFVLEFFLPKDCQDTEEQKQML  
NSLSIVLQQACRSLHAVIDKELPDEDEIYPVKEVAIEECHKSGSSTLKEGSPKDQSSWIAHMMEAQQKGKGVSSIS  
LEYQEEEQNEEFKVTTHWDNINTQGGSCNGQAFSDFGQVQQSSGSKGSVEGGGDSYSYGSRRSSGGRKSGEK  
RRTKTEKTISLPVLRQYFAGSLKDAAKSIGVCPPTTLKRICRQHGITRWPSRKIKKVGHSLRKLQLVIDSVQGAEGAI  
QIGSFYSNFPESLPATSSFSLKMSSENSKQSNPIESSGLFTPSKSPSSCSQTSGPSIFCATAANHHHTTTINALS  
SGDTLMRENPIGILQMACSEADLHALNQEANLLQNAMITCGLDITLPVLPESSSHNSRDGGAFRVKATFGDE  
KIRFSLHPNWTFGDLQMEIRRRFNLDDISRVDLKYLDDEWVLLTCDADFQECIDIYRASQSHIRLSLQHASN  
PNLGSPFGSSGLS

>Arabidopsis\_thaliana\_AT2G17150.1

MEDDGGSDGGEGNGGFSPNSSFGAFADTAMDLDMDLLEFDGCWLETTDSKSLKQTEQSPSASTAMNDNS  
PFLCFGENPSQDNFSNEETERMFPQAEKFLLEAEVKGSWWIAPSASEGPSSSVKERLLQAIISGLNEAVQDKDF  
LVQIWVPIQQEGKSFLTWAQPHLFNQEYSSLAEYRHVSETYNFPADEGMKDFVGLPGRVFLQKPEWTPDVR  
FFRRDEYPRIKEAQKCDVRGSLALPVFERGSGTCLGVVEIVTTTQKMNYRQELEKMCKALEAVDLRSSNLNTPS  
SEFLQVYSDFYCAALPEIKDFLATICRSYDFPLALSWAPCARQGKVGSRHSDENFSECVSTIDSACSVPDEQSKSF  
WEACSEHHLLQGEGIVGKAFEATKLFFVPEVATFSKTNYPALHHAKISGLHAALAVPLKSKSGLVEFVLEFFFPKA  
CLDTEAQQEMLKSLCVTLQQDFRSSNLFIKDLELEVLPVRETMLFSENLLCGAETVESLTEIQMQESSWIAHMI  
KANKEGKDVLSWEYKQEDPKELSSGRENSQLDPVPNNVPLEAEQLQQAQSTPGLRVDIGPSTESASTGGGNML  
SSRRPGEKKRAKTEKTIGLEVLRQYFAGSLKDAAKSIGVCPPTTLKRICRQHIGIMRWPSRKIKKVGHSLKKLQVLM  
DSVQGAQGSIQLDSFYTSFPELNSPNMSSNGPSLSKNEQPSHLNAQTDNGIMAEENPRSPSSSCSKSGSSNN  
NENTGNILVAEDADAVLKRAHSEAQLHNVNQEETKCLARTQSHKTFKEPLVLDNSSPLTGSSNTSLRARGAIKVK  
ATFGEARIRFTLLPSWGFALKEIARRFNIDDISWFDLKYLDDEKWEVLLTCEADLVECDIYRLTQHTHIKISLNE  
ASQVKLSGSGNTGLS

>Arabidopsis\_thaliana\_AT2G43500.1

MENPFASREKGFNYSDFPTEQMDGLSSNFGSGVRNLISDDMFNPSSSELMNFDSLAAWCNPSATDILFAQY  
GLSNSQPMFPGAFTSFHVADPKATSLTRSFYDLESSYGEERSSAQEMNSQFHRSSDSDELSGKRRKVVNQKIG  
FPNVLNTIPRSLSHSLDEKMLKALSLFMESSGSGEGILAQVWTPIKTGDQYLLSTCDQAYLLDPRFSQYREVSRR  
FTFAAEANQCSFPGLPGRVFISGVPEWTSNVMYYKTDEYLRMKHAIDNEVRGSAIPILEASGTSCCAVMELVTS  
KEKPNFDMEMDSVCRALQAVNLRTAAIPRPQYLSSSQRDALAEIQDVLRTVCHAHKLPLALAWIPCRKDQSIRV  
SGQKSGENCILCIEETACYVNDMEMEGFVHACLEHCLREKEGIVGKAFISNQPFSSDVKAYDISEYPIVQHARK  
YGLNAAVAIKLRSTYTGEDDYILELFLPVSMKGSLEQQLLDLSLGTMQRICRTLRTVSEVGSTKKEGTPGFRSSD  
MSNFPQTTSSENFQITSLDSEFNSTRSMFSGMSSDKENSITVSQGTLEQDVSKARTPEKKKSTTEKNVLSALQQ  
HFGSLKDAAKSLGGETSAYFQAWVYFFCPTTLKRICRQHIGIMRWPSRKINKVNRSLRKIQTVLDSVQGVGGL  
KFDSATGEFIAVRPFIQEIDTQKGLSSLDNDAHARRSQEDMPDDTSFKLQEAHSVDAIKLEEDTTMNQARPGS  
FMEVNASGQPWAWMAKESGLNGSEGIKSVCNLSSVEISDGMPTIRCSGSIVEPNQSMSCSISDSSNGSGAV  
LRGSSSTSMEDWNQMRTHNSNSSESSTTLIVKASYREDTVRFKFEPSVGCPLQYKEVGKRFKLQDGSFQLKYL  
DDEEWVMLVTDSDLQECLEILHGMGKHSVKFLVRDLSAPLGSSGGSNGYLGTL

>Arabidopsis\_thaliana\_AT4G24020.1

MCEPDDNSARNGVTTQPSRSRELLMDVDDLDLDSWPLDQIPYLSNRMISPIFVSSSEQPCSPWLWAFSDG  
GGNGFHHATSGGDDEKISSVSGVPSFRLAEYPLFLPYSSPSAAENTTEKHNSFQFPSPLMSLVPPENTDNYCVIK  
ERMTQALRYFKESTEQHVLAQVWAPVRKNGRDLTLTGQPFVLNPNNGNLNQYRMISLTYMFSVDSSEDVEL  
GLPGRVFRQKLPEWTPNVQYSSKEFSRLDHALHYNVRGTLALPVFNPSGQSCIGVVELIMTSEKIHAYEVDK  
VCKALEAVNLKSSEILDHQTQICNESRQNALAEILEVLTVCETHNLPLAQTWVPCQHGSVLANGGGLKKNCT  
SFDGSCMGQICMSTTDMACYVVDHVWGFRDACLEHHLQKGQGVAGRAFLNGGSCFCRDITKFKCTQYPLV  
HYALMFKLTTCAISLQSSYTGDDSYILEFFLPSSITDDQEQDLLGSILVTMKEHFQSLRVASGVDFGEDDDKLSF  
EIIQALPDKKVHSHKIESIRVPFSGFKSNATETMLIPQPVVQSSDPVNEKINVATVNGVVKEKKTEKRGKTEKTIS  
LDVLQYFTGSLKDAAKSLGVCPTTMKRICRQHIGISRWPSRKIKKVNRSITKLKRVIESVQGTGGDLTSMASV  
SIPWTHGQTSAPLNSPNGSKPPELPNTNNSPNHWSSDHSPNEPNGSPELPPSNHGKRSRTVDESAGTPTSH  
GSCDGNQLDEPKVPNQDPLFTVGGSPGLLFPYSRDHVSAAASFAMPNRLLSIDHFRGMLIEDAGSSKDLRN  
LCPTAAFDKQDNTWMNNDNNSNNNLYAPPKEAIVANCEPSGSEMRTVTIKASYKDDIIRFRISGSGIME  
LKDEVAKRLLVDAGTFDIKYLDDDNEWVLIACDADLQECLEIPRSSRTKIVRLLVHDVTTNLGSSCESTGEL

>Arabidopsis\_thaliana\_AT4G35270.1

MEGGRGGGDGNFLPNSNFGVFSDSAMDMDMDLLEFDGCWLETTDGKSLKQTMGQQVSDSTTMNDNN

NNSYLYGYQYAENLSQDHISNEETGRKFPPIPPGFLKIEDLSNQVPFDQSAVMSSAQAEKFLLEESEGGRRYWIA  
PRTSQGPSSSVKERLVQAI EGLNEEVQDKDFLIQIWLPIQQEGKNFLTTS EQPHFFNPKYSSLKRYRDVSVAYNFL  
ADEDSKESVGLPGRVFLKKLPEWTPDVRFFRSEEPRIKEAEQCDVRGSLALPVFERGSGTCLGVVEIVTTTQKM  
NYRPELDNICKALESVNLRSSRLNPPSREFLQVYNEFYAALPEVSEFLTLCRVYDLPLALTWAPCARQGKVG  
RHSDEFSECVSTVDDACIVPDHQSRLFLEACSEHLLQGEGIVGKAFNATKFFVPEVTTFSKTNYP LAHHAKI  
SGLHAALAVPLKNKFNSSVEFVLEFFFPKACLDTEAQQDMLKSLSATLQQDFRSLNLFIDKELELEVFPVREEVV  
FAENPLINAGTGEDMKPLPLEEISQEDSSWISHMIKANEKGKGVSLSWEYQKEEPKEEFMLTSGWDNNQIGSG  
HNNFLSEAEQFQKVTNSGLRIDMDPSFESASFGVGQTLLGSRPGEKRRTKTEKTIGLEVL RQYFAGSLKDAAKS  
IGVCPTTLKRICRQHGITRWPSRKIKKVGHS LKKLQLVIDSVQGVQGSIQLDSFYTSFPELSSPHMSGTGT SFKNP  
NAQTENGVSAAQTAAAPKSPSSSSCSHSSGSSTCCSTGANQSTNTGTTSTNTVTTLMAENASAILKRARSEVRLH  
TMNQDETKSLSRTL SHKTFSEHPLFENPPRLPENSSRKLKAGGASKVKATFGEAKVRFTLLPTWGFRELQHEIAR  
RFNIDNIAPFDLKYLDDDK EWVLLTCEADLEECIDIYRSSQSRTIKISVHEASQVKLGGSFGSIGLGP SL

>Arabidopsis\_thaliana\_AT4G38340.1

MVGPFKKILHAHNQRFPPSSSSSLDPVVDSSRKQTRIILSYLLHLSLSLHITYSLCLLHFFFGSSNPFS PMEESNNS  
AVVDFPDNFMDQLLWEECWEEEA TQHDQALSSPSGLKERVACAMGHLQEV MGERELLIQLWVPVETRSGRV  
LSTEEQPY SINTFSQSQSLALYRDASAGYSFAAEV GSEQLVGLPGRVFLRRMPEWTPDVRFFRKEEYPRIGYARRY  
QVRATLALPLFQGTSGNCVAVMEMVTTHRNLEYASQLSTICHAEAFDLRTSQT SIVPASLKVTS SSSSSSRTEVA  
SILQGICSSHGLPLAVTWGHQDSSSCLSALISAYAADHG SRCFLAACSEHLLGGEGIAGRAFATKKQCFATDVA  
IFSKWSYPLSHYAKMFDLHAALAVPILTRGNRTVQFVLELFFPRDCLDIQTHSLTASQLKLR FQSSPHLMVDDN  
QIAEEVRDAATPPLTQEDPKGKQVSFSFSASSLENRKRKTKAEKDITL DTLRQHFAGSLKDAAKNIGVCPTTLKRI  
CRQNGISRWPSRKIKKVGHSRLKLQVVMDSVEGVQGS LHLASFYSSFPQLQSSSSSSFPFINPTQT VHVPPKSP  
SSSGSQSSSGSSTCCSSEEQQLGGFQKPALSHPQLLT LSSMHEDQRPVVRTSSLPLPSATT PRKAKDGMKVKA  
MFGDSMLRMSLLPHSRLTDLRREIAKRFGMDDVLR SNFSLKYLDDDDQEWVLLTCDADLEECIQVYKSSSLKETIR  
ILVHHPLSRPSFGS

>Arabidopsis\_thaliana\_AT4G35590.1

MVDQGGFTLKKEKKKNILKLFYVKILGFCFCD SWSSSDMAHSLTSLAVFQSVIRKEMVRSLHVYESVEIEREFWF  
KSKSCYVEKKAKPLFRSED FRRPEISEGSVFGTWRCIFVFRFNHSLPRFPTLLCLSRNPKLEDIPNLANELKFISELK  
PSKIYEEEQCSSSTEGYNSDLPKPRKLV LKQDLNCLPDSETESEESVNEKTEHSEFENDKTEQSESDAKTEILKKK  
KRTPSRHVAELSLEELSKYFDLTIVEASRN LKVGLTVLKKKCREFGIPRWPHR KIKSLDCLIHDLQREAEKQKEKNE  
AAAMAVAKKQEKLETEKRNIVKRPFM EIGIETKKFRQENFKKRHRASRAKKNQESLVTSSST

>Arabidopsis\_thaliana\_AT1G74480.1

MADHTTKEQKSFSFLAHSPSFDHSSLSYPLFDWEEDLLALQENSGSQAFPFTTTS LPLPDLEPLSEDLNSYSSAS  
WNETEQRNGDGASSEKKRENGTVKETT KKRKINERHREHSVRIISDITTYTTSSAPT TLSKETVSRYFYMPITQAA  
IALNVGLTLLKRRCRELGIRRWPHRKLMSLNT LISNVKELQKMEGEENA EKLQDALEMLEKEKRTIEDLPDLEFK  
DKTKRLRQACFKANHKKRKKRSLKSDQSQVPSCSSSGSVPSDES VDEAGMESDEEMKYLLCGFSSEFTSGL

>Arabidopsis\_thaliana\_AT1G64530.1

MELDDL DLSGSWPLDQITFASNFKSPVIFSSSEQPFSPLWSFSETSGDVGGELYSA AVAPTRFTDYSVLLASSESET  
TTKENNQVPSPSWGIMPLENPDSYCAIKAKMTQALRYFKESTGQQHVLAQVWAPVKNRGRYVLT TSGQPFLV  
GPNSNGLNQYRMVSLTYMFSLDGERDGELGLPGRVFRKKLPEWTPNVQYYSKEFSRLGHALHYNVQGT LAL  
PVFEP SRQLCVGVVELIMTSPKINYAPEVEK VCKALEAVNLKTSEILNHETTQICNEGRQNALAEI EILTVCETYK  
LPLAQTWVPCRHRSVLAFGGGFKKSCSSFDGSCMGKVC MSTSDLAVYVDAHVWGF RDACA EHLQKGQG  
VAGRAFQSGNLCF CRDVTRFCKTDYPLVHYARMFKLTSCFAVCLKSTYTGDD EYVLEFFLP PAITDKSEQDCLLGS  
LLQTMKQHYSSLKV VSETELCENNMSLEVVEASEDGMVYSKLEPIRIHHPAQISKDYELN APEQKVSLNSDFM  
ENNEVDDGVERFQTL DPIPEAKTVKKSERKRGKTEKTISLEV LQQYFAGSLKDAAKSLGVCPTTMKRICRQHGIS

RWPSRKINKVNRSLTRLKHVIDSVQGADGSLNLTSLSPRPWPHQIPPIDIQLAKNCPPTSTSPLSNLQDVKIENR  
DAEDSAGSSTSRSACKVNPICETRFRLPTHNQEPSRQVALDDSDSSSKNMTNFWAHLTCQDTASPTILQHKLVS  
KATYREDIIRFKISPESVSITELKQQVAKRLKLETAFAELKYLDDREWVSVSCDADLSECLDTSAAKANTLRLSVH  
DVTNFGSSCESSEETMMCL

>Arabidopsis\_thaliana\_AT1G18790.1

MKSFCCKLEYDQVFGKENNSFSFLNHSSLYSHQSELANPFFELEDEMPSATSSNCFTSASSFLALPDLEPISIVSHE  
ADILSVYGSASWTAEETMFVSDFAKKSETTTTKRRRCREECFSSCSVSKTLSKETISLYFYMPITQAARELNIGLTLL  
KKRCRELGIKRWPHRKLMSLQKLISNVKELEKMEGEENEDKLRNALEKLEKEKKTIEKLPDLKFEDKTKRLRQACF  
KANHKKRRSGMSTPITSSSSASASSSSYSSVSGFER

>Arabidopsis\_thaliana\_AT1G76350.1

MENNSLPMDPAMDSSFMGDLLEGCWLETTDASEFLNFSPTSVAPFDPSSFMWSPTQDTSNLSQMYGQD  
CPESSLEDQNNQGRDLSTFNRRWWIGPSGHHGFSVMERLVQAVTHIKDFTSERGSLIQLWVPVDRGGKRVLT  
TKEQPFSDHPCQRLAHYREISENYQFSTEQEDSDSSSRDLVGLPGRVFLGKVPWTPDVRFFKNEEYPRVQH  
AQDCDVRGTLAIPVFEQGSQICLGVIEWVMTTQMVKLSPDLESICRALQAVDLRSTEIPPSLKGPDFSYQAALP  
EIRNLLRCACETHKLPLAQTWVSLKQSKTGRHNDENYIHCVSTIDDACYVGDPTVREFHEACSEHHLLKGQG  
VVGAEFLTNGPCFSSDVSSYKKSEYPLSHHATMFGLHGTVAIRLRCIHTGSVDFVLEFFLPKNCRDIEEQRKMLN  
ALSTIMAHVPRSLRTVTQKELEEEGDSMVSEVIEKGVTLPKIENTTEVHQSTPQNVGLVFDGGTTEMGELGSE  
YGKGVSVNENNTFSSASGFNRVTEKKRTKAEKNITLDVLRQYFAGSLKDAAKSIGVCPTTLKRICRQHGIQRWPS  
RKIKKVGHSLQKIQRVIDSVGVS GHHLPIGSFYASFPNLAASPEASSLQQQSKITFLSYSHSPPAKSPGSSCSHS  
SSCSSETQVIKEDPTDKTRLVSRFSKETQTHLSPSSQEDDFLRVKVSYEEEKIRFKMRNSHRLKDLLWEIAKRFSIE  
DVSRYDLKYLDEDNEWVLLRCDDDV EECVDVCRSFPGQTIKLLQLSSSYLPERSSVSGCLS

>Arabidopsis\_thaliana\_AT1G20640.1

MEDSFLQSENVMDADFMGDLDDGCWLETTDGSEFLNIAPSTSSVSPFDPTSFMWSPTQDTSALCTSGVVS  
QMYGQDCVERSSLDEFQWNKRWWIGPGGGGSSVTERLVQAVEHIKDYTTARGSLIQLWVPVNRGGKRVLT  
KEQPFSDHPLCQRLANYREISVNYHFAEQDDSKALAGLPGRVFLGKLPEWTPDVRFFKSEYPRVHHAQDCD  
VRGTLAIPVFEQGSKICLGVIEWVMTTEMVKLRPELESICRALQAVDLRSTELPIPSLKGCDLSYKAALPEIRNLLR  
CACETHKLPLAQTWVSCQQQNKSGCRHNDENYIHCVSTIDDACYVGDPTVREFHEACSEHHLLKGQGVAGQA  
FLTNGPCFSSDVSNYKKSEYPLSHHANMYGLHGAVAIRLRCIHTGSADFVLEFFLPKDCDDLEEQRKMLNALSTI  
MAHVPRSLRTVTDKLEEESEVIEREEIVTPKIENASELHGNSPWNASLEEIQRSNNTSNPQNLGLVFDGGDKP  
NDGFGLKRGFDYTMDSNVNESSTFSSGGFSMMAEKRTKADKTITLDVLRQYFAGSLKDAAKNIGVCPTTLKRI  
CRQHGIQRWPSRKIKKVGHSLQKIQRVIDSVQGVSGPLPIGSFYANFPNLVSQSQEPSQQAKTTPPPPPVQLA  
KSPVSSYSHSSNSSQCCSETQLNSGATDPPSTDVGGALKKTSSEIELQSSSLDETILTSSLENIPQGTNLLSSQD  
DDFLRIKVSYGEEKIRLRMRNSRRLDLLWEIGKRFSDMSRYDLKYLDEDNEWVLLTCDEDV EECVDVCRTP  
SHTIKLLQASSHHFPERSSATEYSLWH

>Arabidopsis\_thaliana\_AT3G59580.1

MENPSASRDNGFCFPDIPVEEMDGWVKNLISEEDMFSSSSTSELMNFESFASWCNSPSAADILFTQYGLSTS  
QSIIPFGGLEGSYACEKRPLDCTSVPRSLSHSLDEKMLKALSLEFMEFSGEGILAQFWTPIKTGDQYMLSTCDQAYL  
LDSRLSGYREASRRFTFSAEANQCSYPGLPGRVFISGVPEWTSNVMYYKTAEYLRMKHALDNEVRGSAIPVLEA  
SGSSCCAVLELVTCREKPNFDVEMNSVCRALQAVNLQTSTIPRRQYLSSNQKEALAEIRDVLRVACYAHLPLAL  
AWIPCSYSKGANDELVKVYGKNSKECSLLCIEETSCYVNDMEMEGFVNACLEHYLREGQGIVGKALISNKPFS  
DVKTFDICEYPLVQHARKFGLNAAVATKLRTFTGDNDYILEFFLPVSMKGSSEQQLLLDSLGMTQRLCRTLKTV  
SDAESIDGTEFGSRVEMTNLPQATVSVGSFHTTFLDLDVNSTRSTFSNISSNKRNMAGSQGTLLQQEISGARR  
LEKKKSSTEKNVSLNLVQQYFSGSLKDAAKSLGVCPTTLKRICRQHGIMRWPSRKINKVNRSRLRKIQTVLDSVQG  
VEGGLKFDSVTGEFVAVGPFIQEFGTQKSLSSHDEDALARSQGDMDVDVSVEPLEVKSHDGGGVKLEEDVETN

HQAGPGSLKKPWTWISKQSGLIYSDDTDIGKRSEEVNKDKEDLCVRRCLSSVALAGDGMNTRIERGNGTVEPN  
HSISSMSDSSNSSGAVLLGSSSASLEQNWQIRTHNNSGESGSSSTLVKATYREDTVRFKLDPYVVGCSQLYR  
EVAKRFKLQEGAFQLKYLDDEEEWVMLVTDSDLHECFEILNGMRKHTVKFLVRDIPNTAMGSSAGSNGYLG TG  
T

>Arabidopsis\_thaliana\_AT5G53040.1

MSSSKHSSVFNYSALFLSLFLQQMDQNSLHHLDSPKIENEYEPDSLYDMLDKLPPLDSLDMEDLKPNA GLHFQ  
FHYN SFEDFFENIEVDNTIPSDIHLTQE PYFSSDSSSSSPLAIQNDGLISNVKEKVTVKKKRNLKKKRQDKLEMS  
EIKQFFDRPIMKAAKELNVGLTVLKKRCRELGIYRWPHRKLKSLNSLIKNLKNVGMEEEVKNLEEHRLIEQEPDA  
ELSDGTTKLRQACFKANYKRRKSLGDDYY

>Arabidopsis\_thaliana\_AT5G66990.1

MADQRPLMTWLEANNYESFLQEDIFSFLDQSLFVDPHSSFIDPFKDFQTQNWFSLQDSIVNHISTTFAADHTFL  
ASLDLEAISSTFSLDISSGWWNENNGNYNNQVEPNLDEISRTNTMGDPNMEQILHEDVNTMKEKTSQKRIIM  
KRRYREDGVINNM SREMMKQYFYMPITKAAKELNIGVTLLKKRCRELGI PRWPHRKLTSNLALIANLKDLLGNT  
KGRTPKSKLRNAELLEMEKKMIEEVPDLEFGDKTKRLRQACFKAKYKRRRLFSSSS

>Arachis\_duranensis\_Aradu.N7C89

MASCNYFFNPQQIDEYFPLPIQCSLYDYDYSSSENTNEYPP LGCWAHEFSIQDMECYPSLPFYETLSIEPISTI  
KDYDFYDIKEGFSVWNEVDAGFDCSEKVSSSSSLNNNNNEENKSIRRVINKRVCREERSSNSTKMLSRKMISD  
YFYMPITQAAKELDVGLTLLKKRCRELGI RRWPHRKLMSLQTLINNVQELGKEEGRESEEKLSAIEILEKEKKLLE  
EMPDLQLEDNTKRLRQACFKANYKKRKLIMGSSSSNSSMESSSSSYNIIGHNATRITSSKGD TMDSVGFISFEDEE  
DQERDIK YALSLPPLSHNIQMV

>Arachis\_duranensis\_Aradu.R5YE9

MECYPSPFYETLSIEPISTIKDYDFYDIKKGFSVWNEVDAGFDCSEKVSSSSLLSNKNNEEDKSIRVMNKRVC R  
EERSSNSTKMLSRKMISEYFYMPITQAAKELDVGLTLLKKRCRELGI RRWPHRKLMSLQTLINNVQELGKEEGRE  
SEEKLRNAIEILEKEKKLLEEMPDLQLEDNTKRLRQACFKANYKKRKLMMGCTSSNSSMESSSSSYHIIGHNAL  
RTSQNNTMGGV EFISFDDDEYQERDIKSVLSLPSLSHNIQMCSSYMFNHPSDASFSSAIR

>Arachis\_duranensis\_Aradu.TG0QF

MKMNI GLTLFKRRCKELSIHWP HRKIKSLHLLVQNLKETALDNKSWSVGARNKDVGESSRNGTHIRDKETKAS  
FLENWMLPKPSLT PSSSPISPTERSILTARKGVEGNREGISGGGKG VATT PRCRTTTPHRQTYPTVATNVDEKRW  
LVSEKVAGLEPTSWRRGIGERQNSHLVA AVHGASSCITVTRRREKMLAGGAASSRHCCTDRHRSIALNETHK  
EEDPVREEGERSEADMVSATAVYLRHCRTAPLRCLVGASVTVAGDLWLENTAIVATEGGRSIAAVLTARHSLV  
TRTTAGDATTWLSHFLLVPPPLFHKHTRSPVKEKKERRARRGERDPEGGRGSPRLAAGGRARSEAE LRSNHR  
VRSLSR YQHRRDLQPVCSVVGKLVAVGVSPSLSL

>Arachis\_duranensis\_Aradu.I1BME

MLVFFYFLIPSLTSLKRRCRELSINRWPHR KIKSLHLLLQN LILIIIGLINDRVKTDYFN

>Arachis\_duranensis\_Aradu.G4SB3

MEDQFFSEGE GIGYWTTPGAQFDG PSMIDNGIKNLVSEEMLDNLPDLMNFDNLAGWDCGNYNATETSLGF  
DEKAVLQQLE TQLGLSEDANDMNNINGSLRELSAADMGNC LVP RPFAWSLDERMLRAMDLFKESVGDGILTQ  
VWAPMKHGNDFILSTSEQPYLLDHMLAGYRDVSRQFTFSAEDKPGSFGLPGRVFNSQIPEWTSNVGYYNKS  
EYLRVEHAINHEVRGSI AVPIIDTLAEP PCCAILVTTKEKTD FDFRELEIVSSALQLVNLRTTTPPRLMSQCLSNNK  
RAALAEIIDVLRAVCHAHRLPLALTWIPCY YSEGID EASIRIKDGG RIPGEKTVLCIEESACYINDIVVGGFVHAC  
VEHYLEEGQGAAGKALQSNRPFFCPDV KAYNISEYPLVHHARKYKLNA AVAVRLRSIHTNDDDYIEFFLPVNMN  
GSEEQQLLLDNLSDTVQRM CQSLRIVSDAELHGIEGSQVQFSKEEGSHMAPDGDHDLVQPM SMTNNETEAA  
HNQAMDGSRKQTEKKSSVEKNFSSSVLQQYFSGSLKDA AKSLGVCPTTLKRICRQHGISRWPSRKINKVNRSL  
KKIQTVLDSVKGVEGGLEFDPYKGGFMPGGSSNQEINAHKSSSLFGKKCSVKYPDPASGSKDSKPIAMDDGGLR

QEPFPVSILESSWCDIAYHSPNTLVADEMADKLGEHHNPTTSSMSDSSNGSGSILRGSRKFEKRHLKAKSPCV  
DNGSKLVVKAAYGEDRIPGCLQLYEAVTRFKLQIGSFQLKYLDDEEWVMIVTNSDLRECIEIFDDLGTAVKFL  
VSETCLVERTLRHDYASSKYLFSWDLFSVRCLSNKRAALTEIIDVLRAVCRAHSLPLALTWIPCYSEIGIGDEASR  
IRTKGRKLPGEKTVLCIEESACYMNDIVVGGFVRACVEHYLEEGQGAAGKALQSNRPFFCPDVKAYNISEYPLV  
HHARKYKLNAAVAIRLRSTHTNDDDYIIEFFLPLNMNRCQEQVLLNLSRTMQRMCTLRKVSDAELYGIEGS  
QVQFSKEEGSHMAPDGNHDSVQPMSTNNETEAHNQAMEGSRKQIEKKRSPVKKNVSLVLQYFSCSLK  
DAAKSLGVCPTTLKRICRQHGIARWPSRKINKVNRSLLKIRTVLDSVQGVGGLKFDYPYKGGFMSVGSNNQIN  
AHKSSLFRKKCSVKYPDPASGSKDSKPIAMGDGGLRQEPFPVSILESWCDIAYHSPNSLVADEMETYLNADKL  
GEHYNPTTSSMTDSSNGSCSILRSSSSASGKFENRHLKAKSPCVDSGSKIIVKAAYGEDLIRFKFDPAAGCLQLYE  
EVAARFKLQIGSFQLKYLDDEEWVVRMANDSDLEDCEIEMLDDLTRAVKLLVHDMPSGLSSLSNG

>Arachis\_duranensis\_Aradu.BBG05

MEDQFFSEGEIGYWTTPGAQFDGPSKIDNGIKNLVSEEMLDNLPDLNFDNLAGWGNIPSVTDHNLNNGI  
SSLASMQYSPDPAFSLVEQDNDPYFMTKDCGNYNATETSLGFDEKAVLQQLTQLGLSEDANDINNINGSLLQEL  
SAADMGNCLVPRPFAWSLDERMLRAMDLFKESVGDGILTQVWAPMKHGNDFILSTSEQPYLLDHMLAGYRD  
VSRQFTFAEDKPGSFLGLPGRVFISQIPEWTSNVGYNKSEYLRVEHAINHEVRGSIAPVIIDTLAEPPCCAVLEL  
VTTKEKTFDFKELEIVSSALQLVNLRTTTPRLMSQCLSNKRAALTEIIDVLRAVCHAHRLPLALTWIPCYSEGV  
GDEASRIRIKDGGKIPGEKTVLCIEESACYVNDIVVGGFVHACVEHYLEEGQGVAGKALQSNRPFFCPDVKAYNI  
SDYPLVHHARKYKLNAAVAVRLRSIHTNDDDYIIEFFLPLNMNGSEEQQLLDNLSDTVQRMQSLRSVSDAEL  
YGVESQVQFSKEEGSHMAPDGDHDSVQPMSTNNETEAHNQAMDGSRKQTEKKKSSVEKNFSLVLQQ  
YFSGSLKDAKSLGVCPTTLKRICRQHGISRWPSRKINKVNRSLLKIQTVLDSVKGVEGGLEFDYPYKGGFMPGGS  
SNQINAHKSSLFGKKCSVKYPDPASGSKDSKPIAMDDGGLQEPFPVSILESSWCDIAYHSPNTLVADEMADK  
LGEHHNPTTSSMSDSSNGSGSILRGSRKFEKRHLKAKSPCVGSGSKITVKAVYKEDMIRFKFDPAAGCLQLYEE  
VATRFKLQIGSFQLKYLDDEEWVMMVTDSDLKECIEILDDLGTAVKFLVSETCLVV

>Arachis\_duranensis\_Aradu.0768L

MDSSLSILLVFNNTIQPELFRSVHVYCRELLDGDREEEVVEREFVLSESGFYVEMKCTPILTSKLKCVDDVCEG  
YKNGVWLCVFAFHADHTPQFTHIPSILLFARNSKLKAIPNLLNDLQIYKLELKAEVKDDLLDSSKEESQGNDSGH  
QSPQKVLVPFNQDLNCLPLDEDTELIDKKTNVESLPGFGAKKRRASDHIKIALPDVLYFDVPIVEASRNLI  
GLTVLKRKCREFGIPRWPHRKIKSLDNLHDLLEEAKHQEPKDKVSAMAMVRRQRMLECEKENMEKKPFMDI  
QTETKRFRQDVFKRRHRARAVEKQSSAV

>Arachis\_duranensis\_Aradu.YRC2R

MPDSCEEKSELPSKSKPQEEHGFPMDFDIYLESSSWPMDHTPSASNPMSPIITTSSEQPFSPLWAFSDVEDDH  
RHVRVVAGDNTNTNTAIETENPVENDDNKKIVSPPFVPLPPIKIPDGYCLIKERMTQALRHFKQLTEQNFLAQV  
WAPVRNGNRYALTTSQGPFVLDPHSNGLHQYRTVSLMYMFPVDGENDEILGLPGRVFQQLPEWTPNVQYY  
TSREYSRRNHAQHYNVRGTLALPVFESPGQSCVGVLELIMTSEKVNYPEVDKVCKALEAVNLSSEILEHPFAQ  
ICNEGRQNALAEILEILTVVCETHNLPLAQTWVPCRHRSVLANGGGLKSCSSFDGHCMGRVCMSASDVAFYV  
IDAHTWGFHDACAHHLLQGGQGVAGRAFLSHNMSFCGNITQFCKTDYPLVHYALMFGLTSCFAICLQSSHTGS  
DDYVLEFFLPPSITNFYEQKDLLGSILATMKQNFQSLKVAAGVELEEGCTIEVVEPINERIHLLESVPVAQSAKSP  
PTLNASLNKDDGVPQGPQMPAWLEDINDGGLDAGGSMNPMTSLDAKIKKKPSEKRGRKAEKMISL  
EVLQRYFSGSLKDAKSLGVCPTTMKRICRQHGISRWPSRKINKVNRSLSKLKCVIESVRGAEGAFALNSVNKDP  
LPIAAGSFTEPCTSKMFNRNASLSIQPSKTRMNENDLTSRVSETNRQVRMQDQLLEGEQSPEKVIHEEGWST  
QEVGTDPEKFRNLGSSSEDSANPHSHNSCHGSPNEISPANIFRPFNKEKSVPLGVSTESTMQPTNALNYANA  
YTALNVERTEPQEPFGRMLLEGVGSSKDLRNLCPLEDQALEACGVNPPCHDLAPKQCMMDTTLNSNNTMIPF  
APKKEMKSVTIKATYKEDIIRFRVFLNCGIVELQEEISKRLKLEIGAFDIKYLDDEEWVWLISCADLQECMDVLT  
SGSNMIRLVVHDTVILGSSCESSGN

>Arachis\_duranensis\_Aradu.46M2Y

MEYGGIVHNENGAFGSLSESAVEAEVDLVDLLEGGCWVETTSAGGCYNWMHNPSDAVVAPQPQYLEMLQL  
QLQEESSSSSSDQESLVGKRWWIGPTRPGPSSSSSSSSSVKERLVAVGYLKDYTKNNNLIQIWVPPRRSPLPLP  
LPLPLDVLTFPNPSPNPNPNCVRFRLRSHEYSHHYQAQQHYDLRGSIALPVFERGTATCLGVLDILITNHLNLTNN  
YRPQLDNVCNALEAVDFRSSHQNLNANFMPPAIKVYEELYQAALNEIVEVLTSVCKTQNLPLGLTWAPCIQQGK  
CGCGHSSAMCVSTVDTACYVGDEMLGFQEACSEYHLFKGQGIVGTAFTSAKPCFAIDITAFSRAEYPLSHLANI  
FGLHAAVAIPRLSLYTGSADFLVLEFFLPKDCHDTEQQKHMLNLSMLVQQACRSLHVATEDDFTPPMLTHHQA  
QAQIMEEACSKDQSWIAHMMEAQVQQKGKGVCSLEYQMEEPKEEFKVTTNWDTANDQAHHQLFSSSDF  
GHIDVLEHSRSTAVDGGEEYALGGRRSSSSSGSGGRKSGDKRRTKAECTISLPVLRQYFAGSLKDAAKSIGVC  
PTTLKRICRQHGITRWPSRKIKKVGHSLKKLQLVIDSVQGAEGAIQIGSFYASFPELSSTDLSSRSESSPSKTHSTTI  
PHQNHNNNTFLKSPSSACSQTLDVVMTESSEAALLKRAHSEAAELLQHASLSQEDTKHNRSLEMARRFNL  
NDISSSSNIDLKYLDEDEGEWVLLACDADLEECKDIHRSSQSRTIRLSLFQASPLNHLATNTFGNGTTSPS

>Arachis\_duranensis\_Aradu.7K2S3

MRDGGVLSSGTMLEPTPPPPPPPLPPPPAPPPTTTTSSISVDYDIINELFVDGCWLAASSSAAAAADGSADFYVP  
SPSFSNPIFDPFSPCLDTEQIESQAREREQEHEKQEPPPFSDLVVAANSCSRNQQQYHHYENQSVENN  
NPNPNPSEFFRRWWIAPSSNPGPGSYVVEKLLKALMCIKDVNRNKMMLIQIWIPVMNRGGTQILRTNGLPF  
SLESRSVNLAKYREISEVYQFSAEEDSKELVPLGRVYKEKVPWTPDVRFFRSYEPYPRVDHAQVYDVRGSLAL  
PIFEQSGKNCLGVVEVVMTQQKINYRPELESVCQALEAVNLTSSKLPTIQNVKVKMEKKKKKNHLRHTSCEKSYE  
TALPEIQEVLRSACEIHKLPLAQTWIPCIKQKQKGRHSEDNYPHCISPVEHACYVGDPSIQVFHEACSEHHLLKG  
QGVAGGAFMTNQPCFAPDITLLSKTDYPLSHHARMFGLRAAVAIRLSIYNSSDDFVLEFFLPLECIDNDEQKK  
MLTSLSLIIQRVCHSLRVIDSKELEEETDFSVEEVIAHEDSGTFASAAAWPEPLQSQIVASLGAQEKSSSETMGTSFS  
DQRQQQQESSVLKGNLDSNGECSTYNVGNLSSKTGDKKSKVDKTITLQVLRQHFAGSLKDAAKNIGVCTTTL  
KRICRQHGIKRWPSRKIKKVGHSLQKLQLVIDSVQGGASGAFQIDSFYSKFPDLAASPNLSGTSLSFNLKQCDNNP  
NLSLIQPDPGSLPEGASKSPSSSCSQSSISSHPCSSMAEQQNHHLTNNNFSSKDQMVLLVGENSSGDGLLKR  
IRSEAEKLSLNERVKIVMPRSQSQETLGQHNVQNGHHGSLSRTKSGTQKEDAAAYRVKVTYGDEKARFKMPK  
NWGYEDLVQEVGRRFCISDMSKFDVKYLDLDDYEWVLLTCDDDLCEIEVCQSSESTTIKLCQLSNTNHSMRNP  
LEFR

>Arachis\_duranensis\_Aradu.1V6B6

MEFFNNELDSFSNDIDKIMGISPMDDFDDWAPLLTYKSTQKFLTDLPEVDNDFDDLPLPDDFKKESEEDQE  
KQLQLVPSSTIKNKKSELEYDEIKKHFLPITEAASKMNIGLTLKRRCRELSIKRWPHRKIKSLHLLIQLKETGL  
DNEVEMLEEEINMLKQVPETEITQETKKLRQAYFKANYKRRKLLASNSS

>Arachis\_duranensis\_Aradu.H6JXR

MEPYYPSPKRSYGASYWGSCRVLQEGSTSLDGDMSNSISDDMACSFSGLMNFDPYAGLYNSPSITDQVFNNGL  
PSSYPSTPGFNLEENNSSQFFRTEMNGYFNTKQSGPGYGEKIAFQQMDTLLGFFDGTDDTHSLSSMQKINGSS  
QHLEDAIGSYIMSKPASLSLDERMLKALSVEKESAGGGILAQVWVPIKGDGQFFLTSEQPYLLDQILAGYREVS  
TYTFSTEGKPGSLPGLPGRVFMSKTPEWTSNIGYYNKNEYLRMDDAINHEVRGSIGLPISDLHSELPCCAVLELV  
TTNEKPDFEKEMDIVCHALQNVDLTANMPPRLLPQCLSNSKRAALTAIVDLRSVCHAHRLPIALTWIPCCVAED  
AEGKDTKIHKEGHSSPREKNILCVEESACYVTDKAMEGFVHACIEHHLQEGKGIAGRAHQSNHPFFCPDVKAY  
NISEYPLVHHARKYNLNAVAIRLRSTYTNDDDYILEFFLPVNMKGSSEQQLLDNLSGTMQKVCNRLRTVSDEE  
LSRMKGSHVGFKNKNVPRIFPMSRRNSQIPLTNSNHDSVRKMSIKASNQGNNGIESSHQERNGSRRMVETK  
RPAEKVSVSLVQQHFSGTLKDAARSIGVCPTTLKRICRQKGISRWPSRKIKKVNRSLKKIQTVLDTVEGLEGLKF  
DPCLGALVSREGESIIQEIDAHDTLHPENVTAKEKWVLNKGGSREDKSKHSSILVNRDDDGAVEHNHPSSSGFT  
NSSNDSGNSQRQNLKGKSTFADKTGLKLQAKATYGEDTVRFKFDPSWGCLKLYEEVATRFKLQNGSFQLKYLDN  
EQELVRLDDSDLQECMEILDEVGKSCVRFVVRDIPCNLSSPSCSSCYLGCD

>Arachis\_duranensis\_Aradu.T4VLF

MSESEEDKTDFAFLKSKEDQQQSPPQLPPPSAMDFDLDETSWPLDHLFSVSNMSPFLFPISSEQPSSPLWL  
FSDAEDERHNNTLASAPAFSDFHKIFSCDSNSVTEKPVENANDEDKKLLPPIVAMPPLEILDRCVIERMTQAL  
RYYKELTEQNVLAQVWAPVRNGNRFLVLTSGQPFLVDPHSNGLHQYRTVSLMYVFSADGEKEESLGLPGRVYQ  
QKVPEWTPDVQYYSTKEYPRRDHAQHYNVRGTLALPVFEPMSQSCVGVLELIMTSQKINYAPEVDKICRALEA  
VNLKSSEILGHQYTQICNEGRQNALAEILEITVVCETHNLPLAQTWVPCRHRSVLAHGGGLKKSCSSFDGSCM  
GKVCMTSTTDIAFYIIDAHLWGFREACVEHHLQQGQGVAGRAFSSSHMSFCRNITRFCKIDYPLVHYALMFG LTS  
SFSICLRSSHTGDDDYVLEFFLPRLITDFNEQKALLGSILTQKHFQSLKIASGVELEQNALVETIEATIEGVHLRFE  
SIPVRQDASPNVREELAQDPSLQKIMMGCNDGGSIGDQIPSLTKNTNKPSEKRGKTEKSSISLEVLRQYFAGSL  
KDAAKSLGVCPTTMKRICRQHGISRWPSRKINKVNRSLSKLRVIESVQGAEGAFALNPLSTSPLPFPEHSTPNK  
FSQQASPTPEQIRENELDASKVLETTIRARAQCLEKMVNDKSGSIREVGKETKGPRAKSCSSADSTNPTSHGSGH  
GSPPIESSPVKDIFITSNNDQCVGLRSPEATMQPPNNTLSYPTTCTMPDMVATELQEPFGGMLVEDAGSSKDLR  
NLCPSVAEAVEDMAPEPCRTNPPFSGLAPKQCMDPLKETVTPFAARIEMKTVTIKATYREDIIRFRVSLNCGIVE  
LKEEVAKRLLKLEVGTDFIKYLDHDDHEWVLACDADLQECIDVSRSSASNIIRVLVHEITSNLGSSCESSG

>Arachis\_duranensis\_Aradu.TED1R

MEDQFFSEGEIGYWTTPGAQFDGSPMIDNGIKNLVSEEMLDNLPDLMNFDNLAGWVEQDNDPYFMTKD  
CGNYNATETSLGFDEKAVLQQLTQLGLSEDANDINNINGSLSQELSAADMGNCLVPRPFAWSLDERMLRAMD  
LFKESVGDGILTQLVNLRTTTPRLMSQCLSNNKRAALTEIIDVLRALCHAYSLPLALTWIPCCYEGVGDEASRIRI  
KDGGRIPEGKTVLCIEESACYINDIVVGGFVHACVEHYLEEGQGVAGKALQSNRPFFYSDVKAYNISAYPLVHHA  
RKYKLNAAVAVRLRSIHTNDDDYIIEFFLPVNMNGSEEQQLLNLSDTMQRMCSLRTVSDAELYGIEGSQVQ  
FSKEEGSHMAPDGDHDSVMPMSLTNNETEAHNQAMDGSRKQIEKKKSPAENISLSVLQQYFSGSLKDAAK  
SLGVCPTTLKKICRQHGISRWPSRKINKVNRSLKKIQTVLDSVKGVEGGLKFDYPYKGGFMSGSSNQEINAHKSS  
LFRKKCSVKYPDPAAGSKDSKPIAMDDGGLRQEPFVSILESSWCIDYHSPNTLVADEMADKLGEHNPPTSS  
MSDSSNGFGSILRGSRKFNKHLKAKSPCDVNGSKLVKAAAYGEDRIRFKFDPAAGCLQLYEEVATRFKLQIGSF  
QLKYLDHDEEWVRMVNDSDLKECMEILDHGTAVKFLVLDIPSGLSSRGSNT

>Arachis\_duranensis\_Aradu.W5BH1

MDNPYFVVPYHDPYDTPPLSPSFFNISNPTLLDLTNVSSGTERHSQQKSNGIQEANLQPTFDPMIQDNNNSVG  
GTGGNNFESIPLLQVHSEEGPSHDFNNDVNTITLSHWLPPVPFSCSCCSILREIVHTNGFNFTKVEIHGRPLIS  
HAIQHPTVNGDFVSTGNLQYQMIDFCRRSIDDVKNFLVEYCRVQSAAGYFMLQDPLSAYYEALCTGLEWVEEF  
SDDTDDLNASNSDDENEQVADNGVGASGKAPRRLSLSEQRDRAGKMKLDDFAPYFHFPIEEASRQMNICPTV  
VKKICRKEGLSRWPYRKIKSTVRQISQLKRTMESKDESKARIAEYWLHLKLREICAGRYPSGIVIP

>Arachis\_ipaensis\_Araip.W1UKI

MFNLYFSGNSNEYPPLECWAHEFSIQDMECYPSLPFYETLSVEPISTIKDYDFYDIKKGFSVWNEVDAGFDCSEK  
VVSSSSSLNNNNNEEDKRIRRMNKRVCREVSSNSTKMLSRKMISEYFYMPITQAAKELDVGLTLLKKRCREL  
IRRWPHRKLMSLQTLINNVQELGKDEGTSEEEKLRNAIEILEKEKKLEEMPDLQLEDNTKRLRQACFKANYKKR  
KLIMGSSSSNSSMESSSYNIIGHNATRITSCKGGTMDSIGFISFEDEEDQERDIKSVLSLPPLSHNN

>Arachis\_ipaensis\_Araip.377BK

MDLKTSYSDWLFVQCLSNNKRAALTEIIDVLRVCHAHSLPLALTWIPCYSEGIQDEASRIKDGRIPEGKTV  
LCIEESASYINDIVVGGFVHACVKHYLEEGQGVAGKALQSNRPFFYPDVKAYNLYTMQFFLPVNMNRSQEQQL  
LLDNLSGTMQRKCQTLRKVSDAELYGIEGSSFCMSLTNNETETAHNQDMESGRKQIEKKRSPVKKNVLSVLQ  
QYFSGSLKDAAKSLVCPTRKRICRQHGIARWPSRKINKVNRLLKKIQTVLNSVQGVGGLKFDPYTGGLMSGGS  
INQEINARKSSLFQKKCSVKHPDPAAKDAVTISPAFGSKGNLAVKFEDDNDNDVCLLGNQLLHSDMLISNSKG  
ELKKNAFVSGVDSKPIAKDDGGLCQEPFVSILESSRCDVAYHSPNSLVADEMETYLNGADKLGEHNPPTSS  
MTDSSNGNLRIGNI

>Arachis\_ipaensis\_Araip.KR88K

MLDSSKEESQENSQGHQSSQEVLPVFNQDLNCRPLDENTTELIDNKTNVESLPGFGAKKRRAQSDHIAKIALPD  
LVEYFDVPIVEALRNLNIGLTVLKKKCR

>Arachis\_ipaensis\_Araip.6M6N8

MDVVERCDEESDNAENYVDNAWKEMSKDKGKGKGLKRKSISECFYMPIAEASRHLKVGLIHLKRRWRDLGI  
QRWPHRKLMSLQTLINNLLQQQQQQKGVDEDESSRIRSAIHILEREKSLLLEIPHLQLETPKG

>Arachis\_ipaensis\_Araip.5C6JK

MEDQFFSEGEIGCWTPPGVQFDGSPMIDNGIKNLVSEMLDNLPLDMNFDNLAGWGNIPSVTDHNLNDNG  
ISSLASMPYSPHDAFSLVEQANDPYFMTKDCGNYNAIETSLGFDEKVVLLQLETQLGLSEDANDMNNINGSLO  
ELSAADMGNCLVPRPFAWSLDEKILRAMNLFKESVGDGILTQVWAPMKHGNDFILSTSEQPYLLDHMLAGYR  
DVSREFTFSAEDKPGSFPGLPGRVFMSQIPEWTSNVGYNKSEYMRVEHAINHEVRGSIAPPIIDTLAEPCCAV  
LELVTTKEKPDFDKELEIVSSALQLVNLRTTTPRLMSQCLSNNKRAALTGIIDVLRVCHAHSLPLALTWIPCYHS  
EGIGDEASRIKDGVKIPGEKTVLCIEESASYINDIVVGGFVHACVEHYLEEGQGVAGKALQSNRPFYSDVKAY  
NISEYPLVHHARKYKLNAAVAVRLRSTHTNDDDYIEFFLPVNMNGSQEQQLLLNLSDTMQRMCQSLRTVSD  
AELYGIEGSQVQFSKEEGSSFCMSMRGNSHMAPDGDHDSVQPMSTNNETEAHNQAMDGSRKQIEKKKSP  
VEKNVSLSVLQQYFSGSLKDAKSLGGKTTTALSICPTTLKRICRQHGIARWPSRKINKVNRSLLKKIQTVLDSVQG  
VEGGLKFDPPYKGGFMPGGSSNQEINAHKSSLFRRKCSGKYPDPASKDAVTVPASGGKDSKPIGMDDGGLRQE  
PFLVSILESSRCDIAYHSPNTLVADEMENYLNAGDKLGEHNPPTSSMSDSSNGSGSRKFENRKHLKAKSPCVD  
KGSKFIVKAAYKEDMIRFKFDPAAGCLQLYEAVTRFSTMKRNG

>Arachis\_ipaensis\_Araip.P1CBC

MSQCLSNNKRAALTEIIDVSRACRAHSLPLALTWIPCYSEGEIGDEASRIKDGCKIPGEKTVLCIEESACYINDI  
VVGGFVRACVEHYLEEGQGVAGKALQSNRPFYSDVKAYNISEYPLVHHARKYKLNAAVAVRLRSIHTNDDDYII  
EFFLPVIMNGSQEQQLLLDNLSDTMQRMCQSLRIVSDDELYGIEGSQVQFSKEEGSSFFMSMRGNSHMAPEG  
DHDSVQPMSTNNETEAHNQAMDGSRKQTEKKSTVEKNVSLSVLQQYFSGSLKDAKSLGVCPTTLKRICR  
QHGIARWPSRKINKVNRSLLKKIQTVLDSVQGVGGLKFDPPYKGGFIPGGSSNQEINAHKSSLFRRKCSGKYPDP  
ASKDAVTVPASGSKDSKPIGMDDGGLRQEPFPVSILESSRCDIVYHSPNTLVADEMENYLNAGDKLGEHNPPT  
TSSMSDSSNGSGSRKFENRKHLKAKSPCVDKGSKIIVKAAYKEDMIRFKFDPAAGCLQLYEQVATRFKLQIGSFQL  
KYLDDEEEWVRMVNDSDLEECIEILDDLGTAVKFLVSDMPGSLSSGSNS

>Arachis\_ipaensis\_Araip.YB35N

MEDQFFSEGEIGYWTTPGAQFDGSPMIDNGIKNLKIPGEKTVLCIEESACYINDIVVGGFVRACVKHYLEEGQ  
GVAGKALQSNRPFYSDVKAYNISEYPIVHHARKYKLNAAVAVRLRSIHTNDDDYIEFFLPVIMNGSQEQQLLLD  
NLSDTMQRMCQSLRIVSDDELYGIEGSQVQFSKEEGSSFFSMYRGNSHMAPEGDHDSVQPMSTNNETEA  
HNQAMDGSRKQTEKKSTVEKNVSLSVLQQYFSGSLKDAKSLGVCPTTLKRICRQHGIARWPSRKINKVNHS  
KPIGMDDGGLRQEPFPVSILESSRCDIAYHSPNTLVANEMENYLNAGDKLGEHNPATSSMSDSEGEIGDEASRI  
RTKDGRKIPGEKTVLCIEESACYTNDIVVGGFVRACVEHYLEEGQGVAGKALQSNRPFYSDVKAYNISEYPLVH  
HARKYKLNAAVAIRLSIHTNDDDYIEFFLPVNMNGSSEEQQLLLDNLAGTMQRKCQTLRKVSDAELHGIEGSSF  
CSMSMRGNSHMAPDGDHDSVQPMSTNNETEAHNQAMEGSRKQIEKKRSPVKNFSLSVLQQYFSGNLKD  
AAKSLGVCPTTLKRICRQHGIARWPSRKINKVNRSLLKKIQTVLDSGVEGGLKFDPPYKGGFMSGSSNQEINAHK  
SSLFRKKCSVKYPDPAAKDAVTISPASGSKGENLAVNQLLHSDILISNSKELKKNKAFSVDVDSKPIAMGDGGLR  
QEPFPVSILESSRCDVAYHSPNSLVADEMETYLNAGDKLGEHNPPTSSMTDSSSGSCSILRPSSSGSPKFENRK  
HLKAKSPCVRGSKIIVKAAYGENIIRFKFDPAAGCLQLYEAVTRFKLQIGSFQLEYLDDEDEWVRMVTDTLEE  
CIEMFDDLGTAVKFLVREPCSNS

>Arachis\_ipaensis\_Araip.38X68

MEYGGIVHNENGFGSLSESAVEAEVDLVDLLELVEGCWVETTSAGGCYNWMHNPSDAVVAPQPQYLEMLQL

QLQEESSSSSDQESLVGKRWWIGPTRPGPSSSSSSSSSSSVKERLVAVGYLKDYTKNNNLLIQIWWPPRRSPLP  
LPLPLPLDVLAFPNPSPNPNPNLCVRFLRSHEYSHHYQAAQHYDLRGSIALPVFERGTATCLGVLDILITNHLNLT  
NNYRPLQDNVCNALEAVDFRSSHQNLNANFIPPAIKVYEELYQAALNEIVEVLTVCCKTQNLPLGLTWAPCIQQG  
KCGCGHSSAMCVSTVDTACYVGDLEMLGFQEACSEYHLFGQGQIVGTAFTSAKPCFAIDITAFSRAEYPLSHLAN  
IFGLHAAVAIPLRSLYTGSADFLVLEFFLPKDCHDTEQQKHMLNSLSMLVQQACRSLVATDDDDFTPPMLTHHQA  
QAAQIMEEACSKDQSWIAHMMEAQVQQKGKGVCSLEYQMEEPKEEFKVTTNWDTTNDQAHHLFSSSDF  
GHIDVLEHSRSTAVDGGEESYALGGRRSSSSSGSGGRKSGDKRRTKAECTISLPVLRQYFAGSLKDAASIGVC  
PTTLKRICRQHGITRWPSRKIKKVGHSLKKLQLVIDSVQGAEGAIQIGSFYASFPELSSTDLSSRSESSPSKKTHTTN  
IPHHQNPNNNTFLKSPSSACSQTLDVVMTESSEAAALLNRAHSEAAELLQHASLQSQEDTKHNSFISSRSNNK  
SHHHHSQDRDKERGAFRVKATFGDEKIRFSLQPNWGFRLQLLEMARRFNLNDISISSNIDLKYLEDGEDGEWVL  
LACDADLEECKDIHRSSQSRITRLSLFQASPLNHLATNTFGNGTTSPS

>Arachis\_ipoensis\_Araip.VC558

MDSSLSILLVFNNTIQPELFRSVHVYCRELLDGDEREVEEVVVEREFVLSESGFYVEMKCTPILTSKLKCVDDVCEG  
YKNGVWLCVFAHADHTPQFTHIPSILLFARNSKLKAIPNLLNDLQIYKLELKAEVKDDLPDSSKEESQGNSDGH  
QSPQKVLPVFNQDLNCLPLDEDTELIDKKTNVESLPGFGAKKRRRAQSDHIAKIALPDLVKYFDVPIVEASRNLI  
GLTVLKRKCREFGIPRWPHRRIKSLDNLHDLLEEAKHQEPKDKVAAMAMVRRQRMLECEKENMEKKPFMDI  
QTETKRFRQDVFKRRHRARAVEKQSSAV

>Arachis\_ipoensis\_Araip.R44NW

MPDSCEEKSELPSKSKPQEEHGFPMDFDIYLESSSWPMDHTPSASNPMSPFIITTSSEQPFSPWLAFSDVEDDH  
RHVRVVGADNTNTAIETENPVENDDNKKIVSPPFVPLPIKIPDGCLIKERMTQALRHFKQLTEQNFLAQVWA  
PVRNGNRYALTTSQGFVLDPHSNGLHQYRTVSLMYMFVVDGENDEILGLPGRVFQQLPEWTPNVQYYTSR  
EYSRRNHAQHYNVRGTLALPVFESPGQSCVGVLELIMTSEKVNYPEVDKVCCKALEAVNLRSEILEHPFAQICN  
EGRQNALAEILEILTVCETHNLPLAQTWVPCRHSVLANGGGLKSCSSFDGHCMGRVCMSASDVAFYVIDA  
HTWGFHDACAHHLLQGGQGVAGRAFLSHNMSFCGNITQFCKTDYPLVHYALMFGLTSCFAICLQSSHTGSDD  
YVLEFFLPPSITNFYEQKDLLGSILATMKQNFQSLKVAAGVELEEGCTIEVVEPINERIHLSLESVPVAQSAKSPQPT  
LNASLNKDDGVPQGPPELQMPAWLDDINDGGLNLDNAGGSTNLMTSLEAKIKKKPSERKRGKAEMISLEVL  
QRYFSGSLKDAAKSLGVCPTTMKRICRQHGISRWPSRKINKVNRSLSKLKCVIESVQGAEGAFALNSVNKDPLPI  
AAGSFTEPCTSKMFNRNASLSIQPSKTQINENDLTSRVSETNRQVRMQDQFLEGEQSPEKVIHEEGWSTQEV  
GTKDPEKFRNLSGSSEDSANPHSHDSCHGSPNEISPANIFRPFNKEKSVPLRVSAESTMQPTNALNYANAYTAL  
NVERTEPQEPFGRMLLEGVGSSKDLRNLCPLEDQALEACGVNPPCHDLAPKQCMMDITLNSNNTMIPFATKK  
EMKSVTIKATYKEDIIRFRVSLNCGIVELQEEISKRLKLEIGAFDIKYLDLDDNEWVLISCDADLQECMDVLTSSGSN  
MIRLVVHDTVSLGSSCESSGN

>Arachis\_ipoensis\_Araip.GND3E

MDFDYINELFVDGCWLAASSSSAAAAADGSADFYVSSPSFSNPIFDPFSWPSLDTEQIESQEREQEHEQQQEQ  
PPFSDHLVVAANNCSQNQQQQYHHYENQSVENNNPNPNPNPSEFFRRWWIAPSSNPGPGSYVVEKLLKALM  
CIKDVNRNKDMLIQIWIPIVNRGGTQILRTNGLPFSLESSSVNLAKYREISEVYQFSAEEDSKELVPGLPGRVYKEK  
VPEWTPDVRFFRSYEPYPRVDHAQVYDVRGSLALPIFEQGSKNCLGVVEVVMVTQQKINRYPELESVCQALEAVN  
LTSSKLPTIQNVKRTSCEKSYETALPEIQEVLRSACEIHLPLAQTWIPCIKQKQEGCRHSEDNYPHCISPVEHACY  
VGDPISIQVFHEACSEHHLLKGQGVAGGAFMTNQPCFAPDITLLSKTDYPLSHHARMFGLRAAAVAIRLSIYNSS  
DDFVLEFFLPLECIDNDEQKKMLTSLIIRVCHSLRVISDKVEEETDFSAEVIAHEDSGTFASAAAWPEPLQSQ  
IVASLGAQEKSSETMGTSFSDQRQQQESSVLKGNLDSNGECSTYVGNLSKTDGDKKSKVDKTITLQVLRQH  
FAGSLKDAAKNIGVCTTTLKRICRQHGIKRWPSRKIKKVGHSLQLQLVIDSVQGASGAFQIDSFYSKFPDLAASP  
NLSGTSLFSNLKQCDNNPNLSIQPDGSLSPGASKSPSSSCSQSSISSHPCSSMAEQQNHHHTNNNFSSKD  
QMVLVVGENSSGDGLLKIRSEAEKSLNEDRAKVVMPRSQSQETLGQHNLKNGHHGSLSRKSKGTQKEDAP

YRVKVTYGDEKARFKMPKNWGYEDLVQEVGRRFCISDMNKFDLKYLDDDYEWVLLTCDDDL EECIEVCQSSES  
TTIKLCLQFSNTNHSMRNPLEFR

>Arachis\_ ipaensis\_ Araip.RLH2R

MEPYPYSPKRSYGASYWGSCRVLQEGSTSLDGDMSNSISDDMACSFSGLMNIDPYAGLYNPSITDQVFSNGLP  
SSYPSTPGFNLEENSSQFFMTEMNGYFNTKQGSPGYGEKIAFQQMDPLLGGFFDGTDDTHSLSSMQKINGSS  
QHLEDAIGSYIMSKPASLSLDERMLKALSVFKESAGGGILAQVWVPIKDGDDQFFLTTSQPYLLDQILAGYREVS  
TYTFSTEGKPGSLPGLPGRVFMSTPEWTSNIGYYNKNEYLRMDDAINHEVRGSIGLPISDLHSELPCCAVLELV  
TTNEKPDFEKEMDIVCHALQNVDLMANMPPRLPQCLSNKRAALTAIVDVLRSVCHAHLRPMALTWIPCCV  
AEDAEGKDTKIHIKEGHSSPREKNILCVEESACYVTDKAMEGFVHACIEHHLQEGKGIAGRAHQSNHPFFCPDV  
KAYNISEYPLVHHARKYNLNAAVAIRLRSTYTND DDYILEFFLPVNMKGSSEQQLLDNLSGTMQKVCRNLRTVS  
DEELSRMKSSQVGFKNKNVPRIFPMSRRNSQIPLTNSNHDSVRKMSIKASNQGNNGIESSHQNERNRSMRMV  
ETKRPAEKKVSVLSVLQQHFSGTLKDAARSIGVCPTTLKRICKQGISRWPSRKIKKVNRSLLKKIQTVLDTVEGLE  
GLKFDPCIGALVSREGESIIQEIDAHD TLLHPENVTAKEKWILNKGSREDKSKHSSILVNRDDDGAVEHNHPSSS  
GFTNSSNDSGSNQRQNLKGKSTFADKTGLKLQAKATYGEDTVRFKFDPSWGCLKLYEEVATRFKLQNGSFQLKY  
LDDEQELVRLDDSDLQECIEILDEAGKSCVRFFVRDIPCNLSSSSSCSSCYLGCD S

>Arachis\_ ipaensis\_ Araip.YWB61

MKQHFQSLKIASGVELEQNALVETIEATIEGVHLRFESIPVRQDASPNVREELAQDPSLQKIMMEGVLSKSCRLR  
WCNQLSTLVEHRAFTLEEDDTIIRAHARFGNKWATIAPLLARTDNAIKNRWNSTLKRKCASMGPIDDPHFAQP  
LKRFRVTSVAVPVSTVVVRYSLTVMAKTEEEGQMDYESTRRDFAGKRECGGKESEEGSVVVDDEGKREKEKEE  
GVGRVDGLWRRRRRAQKMEGEREDGLVVVVAMFAPTTMKRICRQHGISHWPSRKINKVNLSLSKLKRIIESVQ  
GVEGAFALNPLSTKQSVSRKWLMIKEVGKETKGPRAKSCSSADSTNPTSHGSPPIESSPVKDIFITSNNDQCVGL  
RSPEATMQLPNNTLSYPTTCAIPDMVATKLQEPFGGMLVKDAGSSKEFCS

>Arachis\_ ipaensis\_ Araip.Y4AFN

MSESEEDKTDFA SPKSKEEQQQSPPQLPPPSAMDFDLDET SWPLDHLFSVSNPNMSPFLPISSEQPSSPL  
WLFSDAEDERHNNTLASAPAFSDFHKIFSCDSNSVTEKPVENANDEDKLLPPIVAMPPL EILD RYCVIKERMTQ  
ALRYFKELTEQNVLAQVWAPVRNGNRFLTTSQGPFVLDPHSNGLHQYRTVSLMYVFSADGEKEESLGLPGRV  
YQQKVPEWTPDVQYYSTKEYPRRDHAQHYNVRGTLALPVFEPMSQSCVGVLELIMTSQKINYAPEVDKICRAL  
EAVNLKSSEILGHQYQICNEGRQNALAEILEILTVCETHNLPLAQTWVPCRHRSVLAHGGGLKKSCSSFDGSC  
MGKVCMTSTTDIAFYIIDAHLWGFREACVEHHLQQGQGVAGRAFSSHMSFCRNITRFCKIDYPLVHYALMFGL  
TSSFICLRSSHTGDDDYVLEFFLP RITDFNEQKALLGSILTIMKQHFQSLKIASGVELEQNALVETIEATIEGVHLR  
FESIPVRQDASPNVREELAQDPSLQKIMMGCNDGGSIGDQIPSLETNTNKPSEKRGKTEKSISLEVLQRYFAG  
SLKDAAKSLGVCPTTMKRICKRQHGISRWPSRKINKVNRSLSKLKRVIESVQGAEGAFTLNPLSTSPLPFPEHSTPN  
KFSQQASPTPEQIRENELDASKVLETTIRARAQCLEKMVNDKSGSIREVGKETKGPRAKSCSSADSTNPTSHGSC  
HGSPPIESSPVKDIFITSNNDQCVGLRSPEATMQPPNNTLSYPTTCAMPDMVATELQEPFGGMLVEDAGSSKD  
LRNLCPSVAEAIVEDMAPEPCRTNPPFSGLAPKQCMDPLKETVTPFASRKEMKTVTIKATYREDIIRFRVSLNCGI  
VELKEEVAKRLKLEVGTFDIKYLD DDHEWVLIACDADLQECIDVSRSSASNIIRVLVHEITSHLGSSCESSGE

>Arachis\_ ipaensis\_ Araip.80XBW

MTRRSCTCKQTPKPRLLSRCFSLSPQRHCSCFVPNSDGSIFNLAMKNTLLTLLVFKNTIREELIRSVHVYQIKDG  
KVREVEREFVFESEGSYGEMRSTPILRLQKKLCVAEVSEGYQNGVWL CIFS FHRDHKPQFSSIPNLLLLSRNLKLR  
TIPTLLRDLRVIYKLEKDKDVLSDSTGEERQGNKDSQPLRKVVPVLTQDLNFLPYEDDMSESPDNKLDVQALP  
DADSAEKKKRASSDRVAKITLSELVKYFDIPIVEASRRNLVGLTVLKRKCREFGIPRWPHRKIKSLDSLIHEIQEEAN  
NQESDDKAAALAAIEKRRMLESEKENIERKPFMDIQSETKKLRQDIFKRRHRARAQVKLNSTVSSSSSSNKTTIET

>Arachis\_ ipaensis\_ Araip.J80SY

MDNPCFVVPYHDPYDTPPLSPSFFNISNPTLLDLTNVASGNESSHSQQKNNI IQDGNLQPTFDPMIQDSNFVG

GTGGNNFESIPLLQVHSEEGLSHDFNNNVNTITLSHWPLPPVPFSCSCCSVLREIVHTNGFNFKKVEIHGRPGLI  
SHAIQHPSVNGDYTSTSNLQYQMIDFCRRGIDDVKNFLVEYCRVQSAAGYFMLQDPLSAYYEALCTGLEWVEEF  
SDDTDDLNASNSDDENEQVADNGVGASGKAPRRLSLSEQRDRAGKMKLDDFAPYFHFPIEEASRQMNICPTV  
VKKICRKEGLSRWPYRKIKSTVRQISQLKRTMESKDVRSKARIOAEIYRLHLKLREICAGRYPSGLVIP

>Arachis\_ipaensis\_Araip.73BCB

MEDQFFSEGEGIGYWTPPGAQFDGSPMIDNGIKNLVSEEKLDNLPDLNFDNLAGWGNIPSVTDHNLNDNGI  
SSLASMPYSPPDAYSVEQANDPYFMTKDCGNYNAIETSLGFDEKAVLQQLETQLGLSEDANDMNNINGSLOE  
LSAADMGNCVPRPFAWSLDEKMLRAMNLFKESVGDGILTQVWAPMKHGNDFILSTSEQPYLLDHMLAGYR  
DVSREFTFSAEDKPGSFPGLPGRVFMSQIPEWTSNVGYNKSEYLRVEHAINHEVRGSIAPPIIDTLAEPCCAVL  
ELVTTKEKPDFDKEIEIVSSALQLVNLRTTSPRLMSQCLSNKRAALTEIIDVLRAVCHAHSLPLALTWIPCYSE  
GIGDEASRIRIKDGGKIPGEKTVLCIEESACYINDIVVGGFVHACVEHYLEEGQGVAGKALQLNRPFFYSDVKAYN  
ISEYPLVHHARKYKLNAAVAVRLRSIHTNDDDYMIEFFLPVNMNGSQEQQLLDNLSGTMQRMQCQLRTVSD  
AKLYGIEGSQVQFSKEEGSSFCMSMRGNSHMAPDGDHDSVQPMSTNNETEAHNQAMDGSRKQIEKKKSP  
VEKNVSLSVLQQYFSGSLKDAKSLGVCPTTLKRICRQHGIARWPSRKINKVNHSLKKIQTVLDSVQGVGGLK  
DPYKGGFMPGGSSNQEINAHKSSLFWKKCSGKFPDPASKDAVTVPASGSKDSKPIAMDDGGLRQEPFRVSIL  
ESSRCDIAYHSPNTLGEHNPPTSSMSDSSNGSGSRKFENRHLKAKSPCLDKGSKISVKAAYKEDMIRFKFDPA  
AGCLQLYEEVATRFKLIGSFQQLYLDDEDEWMMMNVNDSVVEECIEILDDLGTAVKFLVKHGSKIIVKAAYKED  
MIRFKFDPAAGCLQLYEQVATRFKLQIGSFQQLYLDDEEKWVMMNVNDSVLEEFIEISDDLRTAVKFLVSDLVV

>Begonia\_fuchsioides\_Begfu1S23960

MSHWETSSGDLENLTPLDGGTGSLSFEDFYGNFSSLSMFDTDSGWCYGGTTDHMLCSSGFSSDLSMPSTSLD  
PLNFVEDNREPFAATESSITSSLGTTYNGGVNSMFQHLDSVFRFEIDSKGVNDESEKQKDVVDHGSYIIPRPF  
WSLDERMLKALSLFKESSGGILAQVWVPMKQANQYVLTTSKQPYLLDQMLMGFREVSRMFTFSIEGKPGSG  
LGLPGRVFASRIPEWTSNVSYKKGEYLRVEHAIGHEVRGSIALPVHDCHSEIPCCAVVELTNKEKRNFDVEME  
VVCQALQAVNLRTSLPPRLTQCLTNDQKSALAEITDVLRAVCAHRLPLALTWIPYCSNTEADNGFTRVHVND  
IIGPKEKRILCIKETASYVNDRTMQDFVSACANHNLQEGQGVGNALQSIHPVFNPDVKTYDMNEYPLVHHVR  
KFGLNAAVAIRLRSTYTGDDDYILELFLPVNMTGSSEQQLLLNNLSGMTMRICKSLRTVSNVNLVCEHPKVGIO  
AETVQKLAPSFISKSPSRLSDSLKTIEKQKLSNSANDGVETKLSSMKTSKSSKHTEKKRSTGEKNVSLSVLQQHFS  
GSLKDAASIGVCPTTLKRMCRQHILRWPSRKIKKVNRLRKIQTVLDSVHGVDDGLKFDPTGGFIATATAME  
EFNDQSCFLLPNKKLPTDEVPAFKDSMSVPQEVSVKVEEDECFLARKSMILSLRIPNNESNAMPIYISDDSKCSS  
LAGDVGEADDEVYNNPRSSATNSSSGSQSVVHGSALCESHSFDGRNQPKDRISCVESGSKITVKASYLEDTVRF  
KFDTTLYFQLCEDIAKRFLFGGTFEIKFLDDEKEWVMLASDSLQECLEIMDDFGSQTVKLLVRDRAFGGSSS  
AGSSCFLSGG

>Begonia\_fuchsioides\_Begfu255S10103

MADPGDEAPYNDPYDELNADDVLVFMSDQNPSLADLANVAEPSSSYPPMLEDGRGSGQSNNQFHDPRRWE  
WVHHQSIAGGSSGAEPSNADPGPLNVGVGPSNFGGDNITVPENVEPQSPADDVSWQVLVHPISPAPFFCRV  
NIRKLEIHGRLGMISHAIYEDRPILSADSSNTQSQMFDFCKKSLGEIKKFFIQYNVNNGIDRFFALPEALFFYDTL  
CVGMEWKQKRSNRNAEPPPPPPATLPTFPLSAPSTTTSSVAAASTSHAGKSARRTASRATFVSLEIVNRFTDV  
IGGAVQRQRTGKMTLGDMMRAYFHLPISEASRRRLCPTVVKIKRQSGLLRTLTPPLPLSHLTADQEMTTLR  
KNRKKRGHVSAGHGRIGKHKRHPGGRGNAGGMHHHRILFDKYHPGYFGKVGMRYPFHKLNRKFHCPIVNIK  
LWSMVPQEVKDKASKDNVPLIDVTQFGYFVKVLGKGLPNDQPIVVKAKLVSKIAEKKIKENGGAVALTA

>Begonia\_fuchsioides\_Begfu745S40752

MADGIFSAVTVLETSSGSVMEFDYMDLQLECCWFETADGSEFLPITPSISSSLFEPYSFGWSVPVINGDSSIP  
PRNNDQNHVSVTMNQKTVDDSGSLNDKCLIESELQKRRSLSPRSFPGQSPVMEKLIKAVNYIQEFVSEKDVLI  
QVWVPVNTGGRLVLTTLDFSVNAACSRKAYRDISMRYQFSAEKDSEDVVGLPSPRVFLRKVPEWTPDVTF

RRDEYPRVTFQAQQCDVRGTLALPVFERGNKSCLAIVVVRTSRQIKYVQELESVCKALEAVDLRSSDALGAPNSK  
LSDCFSYGEVELFVLAIEHSVLRFACETHRLPLAQTWAPCVQQRQGCRHSDENYVRCVSTVDRACFVADPSLG  
PFHEACSEYHLLKGQGVVGEAFTTHKPCFSSDVKSYGNTYPLSHHARMFNLWAAIAIRLSFHAGKADFVLEF  
FLPVTCTDHEEQRIMVSSLLIIQHISIRSLRLVTDKELENEARRPFAIPEIPQVQPGDDDFTVVGDDSRQKYMGEN  
SFSLKRNRKQDSSLKEAVDGESECFNFGEGSLLAVGGGGKPGGEKKRIKAEKAITLQVLRQHFAGSLKDAAKSIGVCP  
TTLKRICRQHGIKRWPSRKIKKVGHSLQKIQRVIDSVEGASGTFRIGSLYSNFPEIASPALSEKSSVLASKIIDCPKTS  
TFQGAASKSGSSSCSHGSSSSSLSCSSRLQLPPSCQYADRSSRENSGDGELKRDKSEAELHVPSQEEMIFTRSQS  
QKTIGEHLGPENSLRRVKDSGRASEEDDSIRAKVTYGAEKIRLKMKNQGFRELLDEICRRFQLSDTSKFDLKYL  
DDDSEWVLLTCDADLEECIDVYKQSESLNQTIKLSLTLSTRNSLGSYDLSQL

>Begonia\_fuchsioides\_Begfu719S50618

MEHPSPNEKGMRCLETSGQLETFMPLDVNMGNLGFEDDYGNFSNLSNLNSSAEWCYSPTPDPVSHYGLSL  
VSSLPCCSLNPSNLVEDNNEAFSMTDISGVTYSMGSSFHQLESVFRFSIDSSDVNNSESKQNNVMDTSNYVISR  
PFGWSLDERMLRALTLFKESSNEGTALQVWVPMKHGNQYVLTASEQLYLLDQMLMGFREVSRMFTFSTEEKP  
GAVLGLPGRVFASKIPEWTSNVSYKKEEYLRVEHALGHDVRSIALPVDFQSEMFCCLAVLELVTNKEKPNFDL  
EMELVCQALRAVNLTATPPRLLPHSLTNNQKSALAEITNVLRAMCHAHRLPLALTWIPCCYARGLDDASTRVH  
VRDSTIGPHEKLIICIEETACYVNDKTMQDFTVCTNHYLEEGQGIVGKAVQSNQPFNHDVQAYNINEYPLVHH  
VRKFGKLKAAVAIRLRSTYTGIDDIYELFLPVDITGRNEQKLLNLSLRTMQRVCRSLRTVSNVDLVCSESKVGFP  
NETVQKLTPISFRNLESSTSDLSAKEKLKLSKSVNEDIETICSSDPTSGSQRLGKKRSTAEKNVLSILQYFSGSL  
KDAAKNIGVCPTTLKRICRQHGISRWPSRKINKVNRSLRKIQTVLDSVQGVGGLKFDPTSGGFATPAPMEEFN  
SQSNFLLPKKKPHCGEEPALNNLLSVPRVCFNDHNSSIKLEDNEFLMAGDDILPSTSISPRKFGVPRVDLSGDSK  
NSIKIFGGLFRNNYSNSHFESQSSSLAADEMDTIGEADDGVVEHNHPLSSSTGDSSSGSRTLLHGSSSGSQSFE  
GQKYPKYKICCVDSGSKITVKASYGEDTIRFKFDPSWGYFQLNEEVAKRFKLPSGSLELKYLDDEKEWVMLGCDS  
DLHECLELMEDLGARTVKFLVRDRPFAVSSSAGSCCLSGD

>Begonia\_fuchsioides\_Begfu734S05472

MKKEGPSSVSSRSRNEGYSFAVPMLVPQLDFSFAVDWPVQENHVDAAALGNICQSDLYSSINIDLVGIPNDFS  
YDCGDVGGVWSVIDEELGFQEKLI FGEDGGMEMKGREEKKGIKISRDEKNSSKMLSRSTISQYFYMPITQAAK  
ELNVGLTLLKKRCRELGI RRWPHRKLMSLQTLIKNVEDLSKDDGVETEAKLRDAVELLKRERLMMEETPDQLLE  
DNTKRLRQACFKANYKKRIMGMVESQASSPSTTYLDSIEVVEFEDEELKTLLSQRSFPSSSGFVF

>Begonia\_fuchsioides\_Begfu1129S16439

MEDIAFSPAPMTGALVEYDMDFSYIDELLFGGCWFETTDGSEFLSSSNSNSFFEPSFRDPAIDTNCGPNTNIDLA  
KTSVFGEYSENRAFPGSELGRRWWIGPRANPGLGSSVMDRLIKAVEYINHLEKDKDVLIQVWIPENRGRRVL  
RTSELAFSMTSSSERLAKYRDI SENYQFSADENSKEGLGPSRVFLGKIPEWSPDVQFFRSDEYARVDFAQQCGV  
RGTALALPVFDRGSRTC VGIVVMTTQQIKYSSELEIVCKALKAVDLRSSNAPETPNSTVFKASYEALFQEIRQVL  
GFACETHKLPLAQTWISCSEQGNVGCRRHSDENYIDCVSTVEEACYVADPFFTA FHEACA EHHLLKGQGIAGEAF  
ETNGPCFSSDVKSFGNTKYPLSHHARMFGLQAAVAIRLSIQSAKTDFVLEFFLPVDCFDVVEQRNLLSSLSLLM  
QERFRSLRVITNKELDEEADLRQQRGTDNHNSGETCRQEVFKEQKGVFTENSSGFSECTRDGSNLIEDSFSNAS  
MGRRAEKRRRTKGEKTISLQTLQKYFAGSLKDAAKSLGVCPTTLKRICRQHGIKRWPSRKIKKVGHSLQKLQVVID  
SVKDTSGSFQIDSLYSNFSELGSPKTGGIISPPSVKVNPNQTTTSKSLSSSCSRSSGSSNCYSSRTKPRHLRLNSST  
SKDPMVGNNSGGYQMKRARSEANLSTPNEGRTILPRSKSHRNLVGCGEDLLCPSKNSKKLTEDKDSRRIKV TYG  
NEKIRFRMHKEWRWKELVDQIERRFRIQDITGFDVKYLD DDFE WVLLTCDADFEELVYRLAKRSTIKLSIQLSR  
HCSK

>Begonia\_fuchsioides\_Begfu1351S18529

MEEAIFSPATMAGALVEYDMDFGYIDELLGGCWLETTDGSDFLGSSNSSLFEPFSFRWAAMDTNGGLNTNA  
PRKDCVSSPLFEAPERHFAEASDHGEQSENCTFQGSSELGRRWWIGPRANPGAGSSVMDRLVKAVGYINDRER

DKDVLIQVWLPENRGRRVLRTELAFSMNSCERLAKYRDISVSYQFSAEENSEEGVGLPSRVFLGKAPEWSP  
DVQFFRSDEYARVDFAQQCGVRGTLALPVFDRGSGTCVGVIEVVMTTQQIKYSSELEIVCRALEAVDLRSSNVL  
GTTKAKVYKASYEALFPEIREVLGLACQAHKLPLAQTWISCSEQNMGGCHSEESYIDCVSTVEEACVSDPFFK  
AFHEACSEHHLLKGQGVAGEAFVTNGPRFSSDIRSFGNTKYPLSHHARMFGLQAAVAIRLSIQSAKTDFVLEFF  
LPDLCIDVADQRNLLTSLLLMQEHFQSLRVITEKELREEVNSQRSNDGACRQEGLNGQKGSHPDQTAYQHPS  
PTSFTNGGHGSLFSPEKPGEVFTENSSGHDTNLEGFSECTLDGSTLVEDSLSNAGMGRRVEKRRVKGEKTISLQ  
TLQKYFAGSLKDAAKSLGVCPTTLKRICRQHGIKRWPSRKIKKVGHSLSLQKLQVVIDSVKDTSGSFQIDSFYTNFSE  
LGSPNMGGIISPAPTKGNDNPQTTSASLSSSSCHSSSSSHCYSSRTKQQLKWNNSISSNPRAGDDSGGFQM  
KRRVSEVHLQTLPRSKSQRNHANTTEDRLQLAEDYQRVKVTYGSNKIRFRMRKEWRWKELIGEIGRRFNIPDIS  
TFDIKYLDDDFEWVLLTCDADLEECLVYRLAQRATIKLSIQLARRSSRWQ

>Begonia\_fuchsioides\_Begfu1417S19338

MADGIFSAVTVLDSFSDSAMEFDYMDELLECCWFETADGSEFLPVNPSISSSLFEPYSIEWSIPEINENSSSIPLS  
NNDQSYRSSTMNQKTVDGSELNDKCSIENSEQQKRWSLSPRSFPGQSSVMEKLNKAVKYIKEFVKDKDVLQV  
VWVPIYTDGRLVLTNNLPFSVNDGCSRLAKYRDISMRYQFSAEKDSKDVVGLPSRVFLRQVPEWTPDVTFFR  
QDEYPRVSFAQQCDVRGTIALPVFERGNKACLAVIEVVRTCRQIKYQELDSICKALEAVNLRSSDALGAPISKLS  
DSFSYGEVEFFVLAEIHSVLRFACETHRLPLAQTWAPCVQQRQGCRRHSDENYVFCVSTVDRACFVADPNVGP  
FHEACSEYHLLKGQGVVGEAFTTNKPCFSGDVKLYGNTEYPLSHHARMFNLAAIAVRLRSFHAGKSDVFLEFFL  
PVTCVDHEEQSRMMSLLIVQHSIRSLRLVTDKEFENEIPQVQPADDRFAVDGDDSRKSMANSLSSKHKNQ  
DSILKEAVDGNDCFNFGEGSSLPVGGGGKTGEKKRTKAEKAITLQVLRQHFAAGSLKDAAKSIGVCPTTLKRICR  
QHGIKRWPSRKIKKVGHSLSLQKLQVIDSVEGASGTFQIGSLYSNPFELASPTLASKIIDCPKAATVQGGSSKSGSSS  
CSHGSSSSLSRSSRLQFPSSWQNAENPNNGGENSGDGEPKRDKSEAELNVSSQEETIFTRSQSQKTHSELH  
GPENSLRGVQDKASEEDNSFRAKITYGDEKIRLKLKRNQGFRELLDEIGRRFHLSDTSKFDLKYLDDDEWVLLTC  
DADLEECDIVYKQSESPNQTIKLSLQLSRSRNSLGRYDLSQQ

>Begonia\_fuchsioides\_Begfu1777S22537

MDDGILSPAAMQGASDSAMDLDYMDELLAGCWLEATDGSEFLNQTPPYSSTPLDPSLSGWSALDVNGDLST  
VPPPNSDQNLGNEKGKLSALTANQKNTDDFDELRRRWIIAPGPASSVRERLMKAVGYIKDFVRDKDVLQV  
WVPVNTGRTVLTTLGLPYSVNTSCSRLSSYGDISMKYQFSAEKDSKDMVGLPSRVFIRKVPWTPDVTFFRSD  
EYPRVSFAQQCDVRGTALPVFEQGNKSLGVIEVVMTSRQIKYGEELQSVCKALEAVDLRSYDALGSPNAKVF  
YRSNQDLLLEIQGISRFACESHSLPLAQTWASCAQQGREGCRHSDENYILCVSTVDQACFVADSSVKPFHEACSE  
HHLLKGQGVVGEAFTTNKPCFMSDIRSYGNTVYPLSHHARMFDLQAAVAIRLSIHARKADVFLEFFLPTSTCD  
PEEQKILLSLSIIQHSCRNLRVVTDKEFKEEGYHPFNAGIASDNKTGIHEIPSVQIYDNACSIFSQDNEIKTVDEK  
SSGRRQNKQDSSFKEAVEGNEECINFGEGSSSTFGIGKTGEKRRTKAEKAITLQVLRQYFAGSLKDAAKSLGVCPT  
TLKRICRQHGIKRWPSRKIKKVGHSLEKLKVIDSVEGGSGAFQLGSLYSNPFELASPNVSRSPLLASKMNDCPK  
TSPVQLEGSIVNLQAPASKSPSSSCSQGSSSSLCCSSKSLQFPICNEGGSEDPNAGENVGIGELKRVKSEAELHV  
SSRGGLDIPRSKSFRLGEHWGVENFQREAKDIRITSEEDDFLRKVTYGDEKIRLRMHKNQGYRELLNEIGSRF  
QIIDTSKFDLKYLDDDEWVLLTCDADLEECMDVYRQSSRSSTRGRTIKLSLQLARVRNLSGSHDLSQL

>Begonia\_fuchsioides\_Begfu1981S47656

MADPGDEVYPNDPYDRLNADDILVMSDQNPSLADLTNVAEPSSSYPPVLEDGRGRGESDDKFHDPRRWEW  
VHRQSIAGGSSGAGPSNADPGPSNAGAGPSNFGGDTSTPLENVEPQSPVDNVSWQVLVHPISPAPFFCSCCL  
VLRQIIHTNGVNIRKLEIHGRGMISHAIYEDRPILSADSSNTLSQMFDCEKSLDEIKKFFIQYNVSNIDRFFALP  
EALAYFYDTLCVGMEEWEEKSNRNAQPPPPPPPPPPPPPPPPPPPPQPLLQLPPPSQPPPPPPGNPPGERA  
SERRSSRSRSLTGPLTSLAAQRQRTGRMTLDDMRAYFHLPISEASRRRLRCPTVVKKICRKSGLRRWPHRKLVS  
YHRKVSILQPNLNSSDPEVKERAIVEIERLRDEMTLIYAGVNLN

>Begonia\_fuchsioides\_Begfu2183S02159

MVSPWALDQISPILITSSDQPCSPWAFSDGEEVGGGKLHAHPRLVHGRIRDNHLGITNLNLATEKPTKNIETSL  
QLPPLCGLKSTENPDGFSSIKEKMTQALRYLKELTDQYVLAQVWAPVKSGDRYVLTLEQPFVLDAQSNGLHQY  
RMVSLMYMFSVDGETNGVLGLPGRVFRQKSPEWTPNVQFYSSKEYPRKSHALHYNVQGTALPVPFESSGQSC  
IGVLELIMNSPKINYAPEVDKVCALAEVNLKSSEILDYPNAQICNEGRQNALAEILEVLTIVCEIHLPLAQTWVP  
CKHGSVLANGGGGLKKSCSSFDGSCRGQVCMASATDIASYIVDAHAWGFRDACLEHHLLKGQGVAGRAFLSQSS  
CFSVDITKFCCKTEYPLVHYARMFELKSCFAVCLRSFGTGDYILEFFLPFVVNEYEQLSLLGAILATMKQHFCTL  
KVASGKFEEGEIFVEIIEASTDDGLKSRFEYIRIPQSDPAPNGGEMFGFRLTELRLPADCDGDENKAGPESKTGNP  
SPPKEARKRSERKRKTEKSSISLEVLQYFTGSLKNAKSLGVCPTTMKRICRQHGISRWPSRKINKVNRSLSKLK  
RVIESVQVAEGAFLTNSPPIPHGTNHLISPIDKPSDNQGENKELSSWMGDGFVGGTLRFDEYIHDKSGPEPK  
LCKGSNESRTKSGSREESAGGSPTSHGSCQGSPANHNIPAKDPLVFTNLEQPIAGVESTGKLTAAALYFVPDLLPA  
TQVEEPFGGMLIEDAGSSKDLRNLCPAADAALDERIPESYWPHCAGSASQFPDISGMRRETKRMTIKAMYK  
EDIIRFRVVMSSGLVELKEEVGKRLKLEVGTFDIKYIDDDQEWVLIACDADLQECVEISKSSSGSNMIRLLVHDLTG  
NLGSSCESTGE

>Begonia\_fuchsioides\_Begfu2529S27430

MESGGRFNAQKVEHPNDFDWIYNGEQPLFRNEFEFPLETYDLEFFPMPLHLNSLPQFEFQDFSDFIGGNFF  
SPEIDCCISSEKPVAMSRSFNERCKDVNEGLRQVSGEERWGFSTTKSWGDEGRRKSESGLLEEIQKQFHLPI  
TMAAKKLKVGVTLLKKKCRELRIMRWPHRKLKSLDSLNNVKEMGMAREMMMLEEHRKMVEEEDPDMQLSE  
RTKRLRQASFKAQYKKRRSQFLCNQV

>Begonia\_fuchsioides\_Begfu2529S48380

MGSHWVRSWSENQAIASNEYCSFAFPCLFPQDFSSHAYDGTYDRPFQDIYSEATLASDFQSDNLYSSLNIEPI  
PSKQNDREFSYNGELCGFWAINEIDLGFRENLEFCENGGMEMREREKKGIKRNKEGKSGSSKTLRATICQY  
FYMPITQAAKELNVGSTLLKKRCRELGIIRRWPHRKLMSLETIRNVQDLSKKDGESESKLRDAVEILKKERTLM  
EEMPDLQLEDETKRLRQACFKANYKKRIMRMVSSSSPSNANLGSIEVEKFEDEEMKSLLSQCSFSSSSGFIF

>Begonia\_fuchsioides\_Begfu2339S26247

MPEPELDSPAVFPLKPTAVDDRDPLLMDFDVDMGSPWPLDQMSPILISSDQPFSPWAFSDGENDGDGRHL  
LHSRSASGMSNLLNVGQKPTHNIETNVLQPLPLWGLASMENPDGYCLIKEKMTRALRYLKELTDQNVLAQVW  
APVKSGGRYMLTTLEQPFVIDAQSNGLHQYRMVSLMYMFSVDGETDEVGLPGRVFKQLPEWTPNVQFYSS  
KEYSRRNHALHYNVQGTALPIFEPGQCIGVLELIMNSPKINYAPEVDKVCALAEVNLKSSEILDHPNTQICN  
EGRRNALAKILEVLTVCESHLPLAQTWVPCRHSVLANGGGGLRKSCSSFDGSCGRVCMASASDLASYVVDA  
RVWGFREACREHHLQKGQGVAGRAFLSQSSCFSSDITQFCKTEYPLGHYARLFELKSCFAVCLRSNFTGDDNYIL  
EFFLPASITEYYEQALLGSLATMKQHFTLKVASGINFEEGEVFEIIQASVDEGPSSRFYVQIPQSVFTPMS  
NGASNGRETCGFNSIKQLAVVCDNEENNCGAENKTHNSIPAPKKDRKKTSEKRGKTEKISLDVLQYFTGS  
LKDAKSLGVCPTTMKRICRQHGISRWPSRKINKVNRSLSKLRVIESVQVVEGAFGMTPLTCTNSPPFAFDGP  
MQRSSPGEHHSNDKESSLVSKMPRNEEYIHEKSGFSPTIRKESNKSRTKSGSREESGGTPTSHGSCQGSPPDES  
LAKDSHGLPYHEHPSKQADSPKKLDPIAPLPIHDPLTEAEEEPFGAMLIEDAGSSKDLRNLCPAADAVIDEHNP  
ESTPTQFVDIIGSRQEAKRMTIKATYKEDIIRFRIPFSSGVVELREEVAKRLKLEVGTFDIKYIDDDQEWVLIACDAD  
LQECVDIPKSSGSNIIRLLIHDLSTNLGSSCESTGEGY

>Begonia\_fuchsioides\_Begfu2948S03146

MSHWETSSGDLENLPLNGGTGSLSFEDVYSNFSSLSMFETDAGWCYGGTDDHMLCSSGFSFPSMLSTSLDPL  
NFVEDNREPAMTESSTTSLETSCFNGVNSMFQHLDTVFRFEIDSSGANDSKSKQDAIDHGSYIISRSFGWS  
LDERMLKALSFKESSGGGILAQVWVPMKQANQYVLTTSKQPYLLDQMLMGFREVSRMFTFSIEGKPGAGLG  
LPGRVFTSRIPEWTSNISYYKKGEYLRVEHAIGHEIRGSIALPIHDCQSEIPCCAVVELVTNKEKPNFDAEMEVC  
QALQYLLVKFDDYLSHDISHLAFAGQSSSEFSACDTNVLGAPMSLFFLVKGVHPPLIANPSSKITAASKVRGFLP  
LIVRMMLPFIHTYLFLELNYLQAVNLRSLPRLPRCLTYDQKSALAEINDVLRACVYAHRLPLALTWIPYCYNT

GASNGFTRLHLRDCILGPKEKHILCMEETASYVNDKTMQDFVSACANHNLQEGQGQVVGNALQTIRPIFNPDVK  
TYDINEYPLVHHVRKFGLNAAVAIRLRSTYTGDDYILELFLPVNMTGSLEQKLLNNLSGTLQRICKSLRTVSNV  
NLVCSEHPKAGIQAEAVQKLAPSFISNSPSRLSDSLNTEVKQKLSNSANDGVETKYSSMKTSKSSKHFEKKQSTG  
EKNVLSVLQQHFSGSLKDAASIGVCPTTLKRMCRQHGI LRWPSRKIKKVNRS LRKIQTVLDSVQGVGGGLKF  
DPSTGGFIATTSAMQEFNNQSCFLLPNKKSPTDEVPAFEDSISVPLEVSVKLEEDCEFLAGESMISLLSIPNNNSN  
VLPIDINDDSKCSSPLAGDEEETIGEGDDEVIGYNNPLSSSTPNSSSGSQSFVHGSASGGSHSFDGRKQPKDRISC  
VDRGSKITFKASYGEDTIRFKFDTSSKYFQLCEDVAKRFKLTSGSFEIKYLDDEKEWVMLASDLDLQECLEIMDDF  
GSQTVKLLVRDRVFGGSSSAGNSPPPKPWDRAGASSGPAPFKPPSAGSTSDVVEASGTANPGEIVSSDRNATT  
NINALGRPVPTRPWEQNYGTGNYVGGYGSTSNYNSGYGSGMYGSYGGVGGYSSGMYGTSMYNRGGYGGLG  
GSSMYGGGMYNGGYSSMGAYGSSMGQYGSSMGGYGMGMGGPYGAQDPNNPYGPPSSPPGFWM SFLR  
VMQGVVNFGRISILIDQNTQAFHMFMTALLQLFDRSGMLY GELARFVLRILGIKTSRQAPPLGPDGLPLPGF  
HKAPTQNLIEGPKAGPDGSDNVVWVNDSDK

>Begonia\_fuchsioides\_Begfu3240S31174

MEQPSSSKEWGMSCWENSRGQWESLMPLDVGMGSHSFEDVYGNSNLSTLDTTDGWCYSPDPIFPGSSSL  
VPSIPCTSLDPSNFVEDNSKAFSMTGISGVTD SMGSSINCGD TDLFHQLESVFRFSIDSSDVHEPETNQNNVTNT  
GSCI SRPVGWSLDERMLRALALFKESSREGILAQVWVPMKHGNQYVLT TSEQPYLLDQMLTG FREISRMFTFS  
TEEKPGAVLGLPGRVFTSKIPEWTSNVSYKKGEYLRVEHALGH DVRGSIAFPVFNFQSAMSCCAVLELVTNKEK  
PNFDMEMEVVCALQAVDLRTTPRLLPQNLTNNQKSALAEITDVLRAVCHAHRLPLALTWIPCFYNTRADG  
SMTVNVRDTSIGPHEKICIEETACYVNDKTMQDFLSVCTNHYLEEGQ GIVGKALQSNQPFNPDVQAYHINE  
YPLVHHVRKFGLNAAVAIRLRSTNTGVDDYILELFLPVDMTGRTEQQ LLLNSLSGTMQRICRSLRTVSNVDLCS  
EHPKAGFPAEAVQKFTPISEISKSR TLDWSANEKLKLLMPLND DVETNCSSDLTSGSHRLEKKRSIAEKNVLS  
VIQQYFSGSLKDAAKNIGVCPTTLKRICRQHGISRWPSRKINKVNRS LRKIQTVLDSVQGVGGGLKFD PSTGSFIA  
AGAPIKEFNQSSFLPEKKLCHRESPGINNSVSPRPCFNHSSSIKLEDGEFLMARDGILPSISIPKRTSDILQGE  
LSSDSKSSSSLAAD EMDTGGEADDGVVEGNHLSSTGDSSSGSRTLHGSSSGSQSFDDQKDPKDKISCVDSGSK  
ITVKVSYGEDMVRFKFDPSWGYFQLTEEVAKRFKLPSGSFELKYLDDEKEWVMLACDSDLQECIELMEDFGGRT  
VKFMVRDRPFAVISSTGSCCFLSGD

>Begonia\_fuchsioides\_Begfu3390S11233

MPEPEFDGAAHFPVKTTADYRDSLLDFDVGSPWTL DQISPILITSSDQPC SPLWAFSDGEEVGDEKLHAHPR  
SVHGITNLNLATEKPTQNIETRLQLPPIWGLKSAENPDGYCLIKEKMTQALRYLKELTDQHVL AQVWAPVKNG  
DRYVLTLEQPFVLDAQSNGLHQYRMVSLMYMFSVDGETDGV LGLPGRVFRQKLPEWTPNVQFYSSKEYSRR  
NHALHYNVQGTALPVFEDQSCIGVLELIMNSPKINYAPEVDKVCKALEAVNLKSSEILDHPNTQICNEGRQNAL  
AEILEVLTFCIEIHLPLAQTWVPCKHGSVLANGGGFKKSCSSFDGSCRGQVCMSATDIASYIVDAHAWGFRDA  
CLEHHLQKGQGVAGRAFLSQSSCFMDITQFCKAEYPLVHYARMFELKSCFAVCLRSSFTGDDNYILEFFLPSVEK  
EYEQVSLLGAILATMKQHFHTLKVASGIKFEEGEIFVEIIEASTDDGLKSRFEYIRIPQSFGLP HESDPAPNGGELF  
GFNSMKPKLPTGVDDDESNTSVEGKRRVPSPSMDVKKRMERKRKTEKSISLDVLQQYFTGSLKNAAKSLGVCP  
TTMKRICRQHGISRWPSRKINKVNRSLSKLKRVIESVQVAEGA FGLTPLTTANSPPFSPDGTNQRGSQIHKPSD  
NQGENKELSQKDLASWMDGGFVGGLTRFDDYIPAKSGIEPKFSKRSNKS GTSKSGSREESAGGSPTS HSGCQG  
SQANDSIPAKDLVVFTHEQPITEAELPGKINPAVSYPAPDLLPATAVEEPFGAM LIEDAGSSKDLRNLCP SAADA  
VLDEHIPEPYWPRFPGSSSAQFADRTRQETKRMTIKATYKEDIIRFRIAMSSGLMELKEEVAKRLKLEVGTFDIKYI  
DDDQEWVLIACDADLQECVEISKSSGSNIIRLLVHDLSSNLGSSCESTGE

>Begonia\_fuchsioides\_Begfu3847S33259

MADPRDNFPYSDPYDDL NADDILNFMADRNPCLDDLKNITRNSSHSGPNLEARVGVEVPGEWERLNPQSIA  
GGSSGAGSSYVGS DRNNQPPEIIQRKIPFDYNVKQILVSPISPSPFCSFCQVLRQIVHSNGISVRKLEIHGRFGMI  
AHAVLEDRPIISANSSNTHYQMTDLCKKSLDEIKQYLIDYSVSNVVDQYRPLPESLLVFYDTLCAGMEWEMNKN

GKENRPPRPSNPPPPPPPSQPPPPPPQRTGRMTVRDMCEYFHLPIAEASRRLLHCPTVVKKICRKSGLQR  
WPYRKIKSYQRKLSMLRSNLNSNEQETTSRTIVEVERIQEELIQIFDVVNLN

>Begonia\_fuchsioides\_Begfu4799S04580

MDDGILSPAAMLGASDSAMDLDYMDLELLAGCWLEATDGSEFLNQTPPFSSTPFPDSSSGWSALDVNGDLST  
VPPPNSDQTPGNENGKVAVQTANQKNTDDFDELRRRWIAPGPASSVRERLMKAVGYIKDFVRNKDVLIQ  
VWVPVNTTEGRMVLTITGLPYSVNTSCSRLSSYGDISMKYQFSAEKDSKDMVGLPSRVFIRKVPWTPDVTFFR  
SDEYPRVSFAQQCDVRGTLALPVFEQGNKSCLGVIEVMTSRQIKYGELESVCKALEAVDLRSYDALGSPNVK  
VFYRSNQDLLLEIQGILRFACESHALPLAQTWASCAQQGREGCRHSDENYILCVSTVDQACFVADPTVEAFHEA  
CSEHLLKGQGVGEAFTTNKPCFVSDIRSYGNTEYPLSHHARMFNLQAAIAIRLSIHSRKADFLVLELLPTSCT  
DPKEQKKILLSLSIIQHSSRNLRFTDKERKEERCPRFNAGVASDSKDRIHEIPPVQIYDNAGSVFSRDNEKSSGH  
RHNQQDSSLKEAVEGNEECINFEGSSSTLGLGKTIEKRRTKAEKAITLQVLRQYFAGSLKDAAKSIGVCPITLKRI  
CRQHGIKRWPSRKIKKVGHSLKLRVIDSVEGGSGAFQLASLISNFPELASPNVTRTSPFLASKTSDCSKTSPVH  
LEGSIANLQAAASKSPSSSCSQSSSLCCSSKSLQFPVPSNEAGSEDPNAEENVGNGELKRVKSEAELHVSSRG  
GIYIPRSQSFRGLTEHWGKENLQTAQDIQRTSEEDNLLRLKVTYGDEKIRLRMHKNQGYRELINEISSRFQIIDTS  
KFDLKYLDDDSEWVLLTCDADLEECMDVYRQSSSRGRTIKLSLQLARISQKKGSKYMKTSRSCVGKWEAVGEED  
TGTESNLDSPAKLNVQTVAKCLPMSRDWWKQFDPA

>Begonia\_fuchsioides\_Begfu58542S38394

MEHPSSSKERGTSCWEPSMGQWESFMPLDGGMGNLSEDFYGNFNLSTPDATAEWCYSPDSIFPSGLSLVP  
SIPCTSLDPPNFVEDSSKAFSMNEINGGTDSMGSSFNCGDKGLFHQLESAFMFAIDSSDVNESETKQNNVMNT  
GSCIISRPVGSWLDERMLRALTYFKESSGEGILAQVWVPMKHGNQYVLTNDQPYLLDQMLSGFREVSRMFT  
FSTEELPGAVLGLPGRVFTSKIPEWTSNVSYKKGEYLRVEHALGHHDVRGSIALPVDFQSVMTCCAVLELVTKK  
EKPNFDMEMEVVCQALQAVNLRSLPPRPLLQNLNNTQKSALAEITDVLRSVCHTHSLPLALTWIPCCYTTRAD  
AGSTTVHVRDITGPHKEICIEETACYVNDKTMQDFLSVCTNHYLEEGQGIVGKALQSNQPFNPDPVQAYHIS  
EYPLVHHVRKFLNAAVAIRLRSTYTGDDFILELFLPVDMMKGSMEQQLLNLSLSETMQRICRSLRTVSNVDLVC  
SEHPKAGFPAPISFGNSKSRSDSLRVNEKLKLSKSVNNDVETNCSSDLTSGSPRLLEKKRSIAEKNVSVLQYQY  
FSGSLKDAKHIGVCPITLKRICRKHGISRWPSRKINKVNRSLRKIQTVLDSVQGVKGLKFPDSTGGFIATGTSIE  
EFNGQSSFLVPEKKLCCRESPGFNNPVSVPRPCFNDQSSSIKLEEDFLMARDDIPTISIPKRTSGILRGELSSDSK  
RLSSLAADEMDFGGEADDGVVDHNLSSSTSDDSSGSRTFLHCSSSGSQSFDDQKHAKDKISSVDSGSKITVKA  
SYGEDMVRFKFDPWSWGYFQLAEVAKRFLPSGSFELKYLDDEKEWMLACDSDLQECIELMEEFGGRIVKLLIR  
DRPFGVGSSAGSCCFLSGD

>Begonia\_fuchsioides\_Begfu91817S44671

MPEPELNPAVFPLKTTAVDDRDPLIMDFDMDMGSPWPLDQMSPILISSDQPFSPLPWPFSEEDDGDIKLHL  
HSRSARGMSNLNLVCQKPTHNIETKVQLPPLWGLTSMENPDVYCLIEKMTALRYLKELTDQSVLAQVWAP  
VNRGGRYMLTTLEQPFVLDAQSNGLHQYRMVSLMYMFSVDGEADGVLGLPGRVFKQLPEWTPNVQFYSSR  
EYSRRTHALRYNVQGTALPIFEPGQCCIGVLELIMNSPKINYAPAVDKVCKALEAVNLKSEILDHPKTQICNEG  
RQNALAKILEVLTVVCERHKLPLAQTWVPCRHRVLANGGGLRKSCSSFDGSCCKGRVCMSASDLASYIVDARV  
WGFREACREHHLQKGQGVAGRAFLSQSSCFSPDVTQFYKTEYPLGHYARLFELKSCFAVCLRSSFTGDDDDVLEF  
FLPSAITEYYEQLALLGSLATMKQHFQTLKVASGINFGDGEVFVEIIQASADEGLSSRFKYVRIPQSVELTPVSNN  
GATNGGETCGFNSMKQELVAVCDDEENNRAAEKETRNSVPSPQKNRKKTSGRKRKGKTEKSISLEILQQYFTGSL  
KDAAKSLGVCPTTMKRICRQHEISRWPSPRKINKVNRSLSKIKRVIESVQVVEGAFGLTPLTTSTGSPFALDGP  
QGSSPGDHHSEEKSSLGSKMPRNELSSFMEDRHIIGALRLDEYIHGKAFFPKIRKESNKSRTTSGSREESAGTP  
PHGSCQGSPDESLLAKDPHDHEHAIKRLVSPEKLNPIAPSPIRDTPTAEESFRAMLIEDGGSSKDLGNLCPYAA  
DAVMDEQNTESWPNRPGSTPSQLVDITGTSTTIKATYKEDIIRFIRLSSGVVELREEVAKRLKLEVGTIFYIKYID  
DDQEWVLIACDADLRECVDISKSSGCNIIRLLIHDLSNLGSSCESTGEGY

>Begonia\_fuchsioides\_Begfu91828S44750

MGSHWAGSWSKNDAFGRNEACSFVPCLLPQFDFSFHAFDWTNDRPFQDSFSEAETLADNFQSDYLCSPJNI  
DSISSKQNADECSYDYGETGGFWNGLNEELGFQENFVFCENGGEKIKEMESKNGNKRNRREEKNGSSKTLSTRTTI  
SQFYFMPITQAAKELNVGLTLLKKRCRELGVFSLSLSLSLSLSLSLSLSLHCHKQNLKEDGDESEGKLRDAVE  
MLKKERNMMEEMPDCLKEDNTKRLRQACFKANYKKRKLMSMVESPPSSPPSSNFESIQEVKFEDEEMKSLLS  
HCSFSSSSFIF

>Cajanus\_cajan\_C.cajan\_11912

MEDHFPPKGKEIGYCTSPGVQLEESTSVDDGGTKNSVSDDMFSYFSELMNFDTYAGWSNSPCLTDQSLANVFSS  
FSSPPDGLNLVEHSNGPFFMTEVGEIHNDMESSPSCEERVIFHQMDIQLGFLDDANNLDSKQNHNGTSQKINT  
SDMCNYYISRSSGRSLNDRMLRALSSFMESADAGMLAQVWLPIKHGDEFILSTSEQPYLLDPKLAGYREVSRF  
TFSAEKGKPGSCPLPARVFISHVPEWTSNVGYYNKTEYLRLEHAMNHEIRGSIALPIDENSQVPCAVLELVTTKE  
KPNFDRELEIVTHALQFLKKYVIYQQSDQHRTNDKCPDDFMQLVNLRTTTPPRLLPQCLSSNKRSAITEIDVL  
RAVCHAHRLPLALTWIPCCYREGTGDETERIRIKEGRTSSNEKCVLCIEESACYVNDGAVRGFVHACVEHHLVEG  
QGIAGKALQSNHPFFYTDVKTYDIVEYPLVHHARKYNLNAVAIRLRSTYTNDDDYILEFFLPVNMTGSSEQQLL  
LDNLSGTMRRICRTLRTVSDAELTGIEGSQGGFPREKVSGIFPLSRNSQITFINDDHDSVQKMSLKVSNLKNNG  
IEAAHSQEMNGSRKQIEKKRCTVEKNVSLSVLQQYFSGSLKDAAKSIGVCPTTLKRICRQHGISRWPSRKINKVN  
RSLKKIQTVLDSVQGVGGLKFDPYTGFGFIAGGSIMQETESHKYLFPKSSVKDPKPKATQKKISVVSAPGSTSEN  
SAIKLDGNDVGLVGNHLVHSRSLISSTNRVEGADEHNHPTSSRTTSSNGSGSIMHGSSSCSQSFENHKHSHKV  
KSTCVDSGSKIIVKAGYRGDTIRFKFDPSAGCFKLYEEVATRFKLQNGSFQLKYLDDEEEWVMLVNDSDLQECTEI  
MDDIGTRCVKFLVRDVPCVLSSRDSNSCFLSDSS

>Cajanus\_cajan\_C.cajan\_12486

MDTSLTHLLLNNTLQPELMRSVHVYRQGEGEREVEREFVSESGSYGEMQATPIFRLKKSCVSEVCEGYRN  
GVWLCIFAFHVDHTPQFSGIPPLLVTRNPKLQMIPNLLNDLHKIYKLDQKEEDKDIPQDSTGEEWQGNNNISE  
PSQKVFRVLEQDLNCLPYEEEESELNDNDTDESSPGLIEKKKRAPSOLVAKISLSDLVKYFGMPIVEASRNLVGL  
TVLKRKCREFGIPRWPHRRIKSLDSLIHDLQEEAKHQELEDMEAAMAVTKRQKMLENEKEDIEKRPFMDIQSET  
KRFRQDVFKRRHRARAIEKHNSTVSTT

>Cajanus\_cajan\_C.cajan\_13414

MEYPFSPKGGGIGDWQSSRAQLEGSTSLDGGMRNSISEDMPNSFSELMNFDTYAGLCDSPSITDQILANELPS  
FASLPYPLPDGFNLVQQNSGQCYSRVGKNNNDMESSPMYGEKVGCCQMDTLLGFFSNSNDGNNLNSKLK  
TNGSSQHSNAFDTGNYIMSRPPGLSLDERMLRALSSFFKESAGGGILAQVWVPIKHGDQFILSTSEQPYLLDQM  
LAGYREVSRFTFSAEGKSGCFLGLPGRVFTSKVPEWTSVDGYYSMSEYLRFEHAINHKVRGSIAFPIFDMHSEL  
PCCAVLELVTTKEADFKELEIVCRALQLVNLRTTKPLRLLPECLSNKKATLTEIVDLRSVCHAHRLPLALTWIP  
CYTEGSRGEATRIQIEGHSTSSEKILCIEESACYITDRAMTGFRACMEHHLEEGKGVAGKALQSNHPFFYPD  
VKTYDISEYPLVHHARKYNLNAVAIRLRSTYTNDDDYILEFFLPANMRGSSEQQLLLDNLSGTMQRICRSLRTVS  
DVELSGIGSSQVGFKKNVPSFFPLSSRNSQIPLINGDRDSSQKMSLKATNLGNNEIEPSPSQERNNGSKRQVQK  
NRSTLEKNVSLSVLQQYFSGSLKDAKHIGVCPTTLKRICRQHGISRWPSRKINKVNRSLKKIQTVLNSVQGVG  
GLKFDPSVGAFAVGGSIIQEIDAHKSLMFPEKNTIKDCAPDTLEAVSVPTAPCEDENFSIKQQAFAPRCKIVLNK  
LVWVSRYLIGDEMDIGVDGDDGVVEPNHPTSSSLTSSNGSGSMHNSNGSESFQNNQSKVKSTIVDSGS  
ILIVKATYGEDTIRFKFDPSAGCFRLYEEVATRFKLQNGSFQLKYLDDEEEWVMLVNDADLQECIEILDDIGTRSVR  
FLVRDMPCVLGSSGSSNGYLGGSL

>Cajanus\_cajan\_C.cajan\_16064

MDFDIGLESPWPLDHVSLVSNPMSPFLLSTISEQPFSPVWAFSDVEDDRQIRIAASGNTNTTNNENPVENDANK  
KTVSPLVALPPSENPDGYCLIKERMTQALRHFKELTEQNVLAQVWAPVRNGNRYALTTSQGPFVLDPHSNGLH  
QYRTVSLMYMFSVDGENDEIQGLPGRVFQHKIPEWTPNVQYSSKEYQRLNHAQHYNVRGTLALPVFEPAGQ

SCVAVLELIMTSQKINYAPEVDKICKALEAVNLRSSSEILEHPYNQICNEDRQYALAEILEILTVCETHSLPLAQTWV  
PCKHRSVLAHGGGVKKSCSSFDGCCMGQVCMSEVAFYVIDARTWGFHEACVEHHLQQGQGVAGRAFLSH  
KMCFCGNITQFCKTEYPLVHYAIMFGLTSCFVCLQSSHTGNDEYVLEFFLPPMITDFNEQKSLGSLATMKPHF  
QSFKIAAGVELEENGVEIVEAINERVHLRFESIPITQSSKSPPRHALPNMGEALPPEPSEQQIMAYCDDINDGGS  
LGDNAGGHIDQNTLLETKTKKKPSERKRGKAEKSISLDILQHYFTGSLKDAAKSLGVCPTTMKRICRQHGISRWP  
SRKIKKVNRLSKLKCVIESVHGAEGAFGLNSLSTSSLPAAAGSFSEPSTSNKQIEMGEQFLGARTQSPEKLINDKV  
GTIQEIGTKGSNKLRTGSGSSEGSANPTPHGSCQGSPNEISPTKDIFIAGNNEQCLVLRGSLESTLLSTRTSTPNR  
PTAYPMPNIVDTTEPQVPFVGQLLEGAGSSKDLRNLCPADAVLEDQVPEACRMNPQRVKSVTIKATYKEDIIRF  
KVSLDCGIVELKEEIAKRLKLEVVTFDIKYLDHDDHEWVLIACDADLLECMDDISSSSGSNIIRLVVDHLSILGSSCESS  
GDWKGCI

>Cajanus\_cajan\_C.cajan\_19885

MSLPHWPPSPKPFCCSCCQVLRQIIHTNGSRFDKLEIHGTIGMISHAIIRNTTPGDPSSNYQMVDFCNRNKEEIK  
SFLKQYCEQQNIFGYIIMKDPISAYDALSTGMDWAQDISDEDDLIENDVEQDQEPEPEPENEMASNARRL  
QVIVFVFLGSVAERVAKMTLGDLSDFHIPIKETAKLLEVSTSVVKKVCRKAELYRWPQRKVKSNMRKITVLRRL  
ANPGTREKTRVEIQRLQQEMVEYCGGLAPTGIEMLQV

>Cajanus\_cajan\_C.cajan\_36762

MDNNNFVGFVSDDDEPFLCLIPNLLVEVDPSLVLPKAQPHQQNDHPFGLQHGNNVPFTIQDQFMQDNNN  
NGEVANFDVESRGQQTMHVDGSNNISNEGGVGNFEIEGRGQTMHGDGSNNIFNEGRVVTSSYVWPLIPRPF  
FCTCCQVLRQIIHTNGVQFEKLEIHGTIGVMGHAIQNRNITQGDHPSSDPHQIIDFHYRSTEQIKSFMVEYCTQ  
MSKLGYYIIVEDVLSTYYEILCTGVDWAKDTSDEDDIDLIPSNMDMGQDFEPEPQPQHEPEPEAVNLKRKRPPDAE  
QRKRKIAMKLEDCSDYFHLTIGAAAQKLDVCISALKSLCRRNNLENWPHRKVPML

>Cajanus\_cajan\_C.cajan\_30678

MEVSPLEGFYEHWDTHHFPYSSKQLCFNELPDIENTFNDLSLPLLGEEMEEVEQKPLKVVVPQKGGHGRDKGF  
GGALVVNEKGFATR.VKKEEENVDKKPLVPRSNM.KKKKKNNNNKSCVLEFEQIKKYFDVPINEAAKKMDVG  
LTLKRRCRELNIMRWPHRKLKSLQTVIDNVKELGLANEIAMLEKHKRMLEKLPGLELSEETKKLRQACFKANYK  
RRRCLALKA

>Cajanus\_cajan\_C.cajan\_27730

MLSRKTVSEFYMPISQAARELNVGLTHLKKRCRELGIQRWPRKLMQLTIKKIQDQIEGYENDEKIRAAIEVL  
EREKRMVEEMPDLQLDDNTRRLRQACLKANYKKRRLMGMHEVHETTISP

>Cajanus\_cajan\_C.cajan\_27731

MLSRKTVSEFYMPISQAARELNVGLTHLKKRCRELGIQRWPHRKLMSLQTLIKKIQEQGEGNENDEKIRAAIEV  
LEREARMVEEMPDLQLDDNTRKLRLQACFKAKYKKRKLTMHEVHETTISP

>Cajanus\_cajan\_C.cajan\_27743

MLSRKTVSEFYMPISQAARELNVGLTHLKKRCRELGIQRWPHRKLMSLQTLIKNIQEQGEGYENDEKIRAAIEV  
LEREARMVEEMPDLQLGDNTRRLRQACFKANYKKRKL.MGMHEVHETTISP

>Cajanus\_cajan\_C.cajan\_29749

MMEAPPPDGTTSMDFEYMGELFLDGCWLEASADGSEFLLQSPSFSNSLFDPSFSWPALETNHNESHDAAFGT  
QQESHNSMVNIVSGGGGGSGMQFQFDAHSVEGASEGVKRWVFAPTPSPGPGPSITEKLLRALTWFKDYNR  
NKDMLIQIWWPVHRGGRPILAAANDLLFSLESRSVNLAKYREISVGYEFSTDEGESKELVPLGRVFRNKVPEWT  
PDVRFFKSDEYPRVDHAQEYDVSGTLAVPIFEQGSKMCLGVIEVMTTQQINYGPELESVCKALEAVDLRSSKH  
SNIQIVKACNRSYDAALPEIQEVLRSACEMHNLPLAQTWIPCVQQKEGCRHSDDNYLLCISPVEQACYVRDPS  
IRPFHEACTEHHLLKGEGVAGGAFMTNQPCFSTDITSKKDYPLSHHARLLGLRAAVAIRLSIYNSTDDFVLEF  
FLPVDCNDSEEQRKMLTSLIIQRVCCSLRVISDKEEELNSVDEVIGLADSGVSRTAICSLQKQEKSSSETMCR  
KFSDLRQQENPILKGNLDCVRECSTSVEGNFSGAGISRTVERRRAKAEKTITLQVLRQYFAGSLKDAAKNIGVCTT

TLKRICRQHGIKRWPSRKIKKVGHSLQKLQLVIDSVQGASGAFQIDSFYSNFPDLASPNLSGTSLFSTLNQADNP  
NSVSTQPEPGALSPEGASKSPSSSCSQKLQHHTNNKDPVAGEDSADVVLKRIRSEAEKLSLRDGTKLLPRSQSQ  
ETLGEHPITQYHRPLLTSSKVDHRVKVITYGDEKTRFRMLKSWGIEDLLQEIARRFNVSDMRKFDVKYLDLDDC  
EWWLLTCADLEECIDVCQSSESSTIKLCLHASSHSMRSSLEFR

>Cajanus\_cajan\_C.cajan\_33924

MEYEGLVQNGAYGSLSEFFAPETDLIDELFVEGCWVETRVNSKSEWSMEAQIEESEVGKRWWIGPRANPGPS  
TSVQERLVVAVGYLKEYAMNSIQVWVPARTTRAQPPYALGLDYGDATRGFEFEDEWSPNPNIRFFRSDEQYDV  
RAGSLALPVFERGTAICLGLQILMPNPNLHNHCHALQGVDFINQNLNVPPGVTVKGFDELYEGALNEIVQVL  
TCVCKAHLPLGLTWAPCIQQGKSGCHLKELLGFQEACSQCHLLGQGGQGVVGTAFTTTKPCFANDMSKA  
LPLAHHANMFGHLHAAVAIPLRVSADFVLEFFLPRDCQDYKHILNSLSMLVQQACRSLHVVTVEEEFLLPVAHE  
MESSSWIAHMMEAQTQQNGKGVSVSLEYLQEPKQEFKVTNNGNCNENEESYGRRGGRKSGDKRRTKAEKT  
ISLPLLRQYFAGSLKDAAKSIGVCPTTLKRICRQHGITRWPSRKIKKVGHSLRKLQVVIDSVQGAQGAIQISFYTS  
FPELSSTTATASAVSQSKNVNNNDTSENNGQQLGATTFKSPTSSCNASIQLQAPHPIQCLEVPPLPQTSVWN  
TTTFRVKATFGDEKIRFSLQPNWVFRDLQMEIARRFNLNENINNIQLKYLDDAREWWLLTCADLEECKDINRSS  
HNRTIRLFLFQASPLNHANAFSGSGSPSYS

>Cajanus\_cajan\_C.cajan\_01716

MPFISGKGEVYPALDWAHDFPIQDYFDVPLMDYPSDPLYETLSIEPTPTVQDYDFYDIKKGFSVWNEVDAV  
LDSEKVLFCNNEESGSGKEMMEDGKVNREEREIGSSSTRLLSRKILSQFYMPITQAARELNVLTLKKRCR  
VLGIRRWPHRKLMSLQTLINNIQELGKEEGKESEEKLSAIEILEREKKLEEMPDILEDNTKRLRQACFKANYKK  
RRLEGRRETQSSSFGHARTIDTTGEYSYENEEERDIKYPLSSVNMVI

>Cajanus\_cajan\_C.cajan\_07275

MSESEENPDCVPRSKAE EEGCNMDFDLEESSWPLDHMSFVSNPMSPFLSNTSDQPYSPLWAFSDGEDE  
RHPRFPASAFSDCHKIFSCDSNSVAEKPVENDDHKLLPPLVPMPPVDTLDGYCVIKERMTQALRYFKELTELNV  
LAQVWAPVRNGNRFLVLTSGQPFVLDPHSNGLNQYRTVSLMYMFSVDGENDGSLGLPGRVFQQLPEWTP  
NVLYYSSKEYPRRDYAHYNVRGTLALPVFEPMSQSLGVLELIMTSPKINYAPEVDKICKALETVNLRSEILDQ  
PYNITLAMLLNQICNEGRQNALSEILEILTVCETHNLPLAQTWIPCRHRSVLAQGGGLKSCSSFDFGSCMGKV  
CMSTTDIAFYIIDAHLWGFDRDACVEHHLQGGQGVAGRAFLSHNMCFCSNITQFCKTDYPLVHYALMFGLTSCF  
AICLRSSHTGNDYVLEFFLPPRVTDHFHEQKTLGSLASVKQHFQSLKIASGVELEDCSIEIVEATIERVHTRFESIPI  
APSIKSPTRHDTSPNMGRNIEHIPSLEAKNIKKPSEKRGKTEKSISLEVLRQYFAGSLKDAAKSLGVCPTTMKRIC  
RQHGISRWPSRKINKVNRSLSKLRVIESVQGAEGAFLNSLSPSPLPIAVGSFPEFPYPMPDFASTELQEPFGG  
MLIEDAGLDLSPKQSMDBTPNAKAVTPFAARKEMKTVTIKATYREDIIRFRVPLTCGIVELKEEVAKRLKLEVGTDFIK  
YLDDDHEWVLIACDADLQECMDVSRSSGSIIRVLVHDITSNLGSSCESSGE

>Cajanus\_cajan\_C.cajan\_37712

MQIWWPERGGGGGGGGVGPDES VWGGYPMMNMNMNMNMNMNMNMNMNMNMNMNMNMNMNMNMNRSI  
RVGFLRWEEGVPGYEEGPGWMGLPVLERGSGKCLGLHIEYEGGVEGAVNEVVEVLTCVCKAQNPLALT  
WAPCTQAKCGYGHSHSNYVSTVDRACFVGDAHLLPFHEVCSDHLLRGQGIVGTAFTTAKPCFATDITAFNTDE  
YPLAHHASVLGLHAAVAIPLRVSTDFVVELFLPKDCLLREHQNHLLNSLSLLLQQACRSLHVVTEDLSFPFPQV  
VEEQSWIANMMEAQAQKKGVCVSLEYLEEPMEEFKVTSCNWDKTPSYVEEQVFSDFIAQDSQTHTH  
TFSARRGRKSGEKRRTKAEKTISLPVLRQYFAGSLKDAAKSIGVCPTTLKRICRQHGITRWPSRKIKKVGHSLKKLQ  
LVIDSVQGAEGSIQIGSFYSSFPELSSAAPCESKNKNINNSLHGHAESPVGVAVALRVKATFADEKIRFSLQQVWG  
FAELQVEIARRFNLNEMRSVLKYLDDEGEWVVLACDADLEECKDLHTASHNRTIRLALFQASPPNTPFPYSPST

>Casuarina\_glauca\_Casgl329S15886

MEMSSQHNPANANAASADQSLSFDDISNYFSLPLNDAATNLGVCTSVLKKICRDNGLDRWPYRKFLCGKSIEEIK  
RYAARERHKELAQISKIGRESGSQQANSMSKLGGTFFPHNLQQQGAKNIQNLRPQNLLSTSLTKGITTLEDFK

CGFPSGGLFTVSNKWWGNSSPDCCEGIFGDEAGINENEKHESQEMAAESSNMVTVDKCEGGKEASEIALQ  
GMGLLA AVRKRAIEGREALKGVVRGYGINKIGKKEKSLLRIFKSSLPKWLYGS

>Casuarina\_glauca\_Casgl194S06200

MDSSRLNVSQIENPQDFDWNAVEYADKLELPPLDKFFDFDPLPFLQNSKQLALTEFQDFEDLNPHFFGADYKL  
PFPYEDVVVDQKPLNSTTDYVDHYDNLVSDLSASSIVVQGEYASSSQSEEEKRSSGRKKS VVLELDEIRKHFSLPII  
KAAKEMNVGLTVLKRRCRELNITRWPHRRIKSLKSLINNVELGLTKDVVMLEEHKRRLKVPDMELTEKTKKL  
QACFKAKYKKRRSLTIQT

>Casuarina\_glauca\_Casgl109S07006

MEKVVLSPGDMLGALPDTAMDLD FMD EIFLDGCWLETTDGSQFLHQIPATSGALLDPSLVWSALEANGNGSE  
SLSQEYNQVEAQRQSPDESQERSLVNAPSRGQNPFI SLAGYSMSEKNVTEGSELGTRWWIAPRGNPGSTSSVT  
ERLMKAIGYIREFTRDRDVLQLWLPVNREGRRILTSNQPFLLGSNCPRMARYRDISGNFVFAEKDSKELVGLP  
GRVFLDKVPEWTPDVRFFRSDEYPRVNHAQEY AICGTLALPIFEKGSSTCLGVIEVVMTKRHIKYRSEVESVRKAL  
EAVDLRSTDALSTDHVKA FNKAYQTALPEILEVLKSACKTHRLPLAQTWVPCIQQGKEGCRHSDENYLD CVSTV  
DHACIVADPNMQGFHEACSEHLLKGQGIVGRAFR TNQPCFSEDITSSGKTDYPLSHHAKVFG LRAAVAIHLRS  
IHTGTADFVLEFFLPVDCTDHQEQKMLSLLSVIIQQVCQSLRVVTDEELKEEAKFAVSGKPSSEETSNEKSSEFW  
HHSRERNLRNAEFGEGCSAYKEGSFPINRAGEKRRTKA EKTITLEVLKQYFAGSLKDAAKSIGVCPTTLKRICRQH  
GIKRWPSRKIKKVGHSRLKLQVVIDSVQGASGTFQIDSVYTNFQELASPNLQGSSPFSASKFNDHPQLSSMQLE  
GRILSPQAAASKSRSSSCSQGSSSSQCCSGTHQHPSTFNVAGCDDPVIGENIGDGV LQRITSEAE LQASNEGPK  
LMARSPSHKSLREHPNAENLLPLKKDSGRLSQEGDALRVKITYGDEKVRFR LQNNCKYTDLLLEIARRFDIDDINR  
FDLKYLD DDAEWILLTCDADLEECIDVGRSSQGQTIKLCLQVSHYQRGMS

>Casuarina\_glauca\_Casgl993S23747

MEIERKLNMDYGAFASNSTTYGNLTDAMEMDFMDELLFEGCWLETTSGSNHLPSPGLTSRALNDPSHYLP LL  
DSNSSGHLNISHHQQIFQEETEGTFPESEGILVEGTELGRR LWIAPRANPSPSTSVKERLMLAIGYLRECTKNMN  
VLIQIWWPIRRGGSYFLTQDQPYFGANCKNLANYRNVSKAYQFAVEEDMEESAGLPGRVFLGKLPEWTPDV  
RFFKKDEYPRINYAQQYDVRGSLALPVFERGSGTCLGVVEIVTNTQKIN YRPELENVCQALESVDLRSSQLLSPPG  
VKACDELYQAALAEIIEVLATVCKAHLPLALTWAPCYQQGKGGRHSDENYALCVSTVDAACFVADLDVLGFH  
EACSEYHLFRGQGTVGTAFTTSKPCFATDITAFSKTEYPLSHHARMFGLRAAVAIPLRSIYTGSSFEVLEFFLPKDC  
QDPEEQRQMLNSLSIVLQQACRSLHAVMDKEPEEQEVIYPVKEIAIASDVRINKEEPQKSGSPPMREASTKESS  
WIAHMMEAQQKGKGV SISLEYQEEEPKEEFKVTT HWDNTLGGSCHGQAFSDFGQLQSSGSKGSVEGGGDS  
YSYGSRRSSGGRRRAGEKRRTKTEKTISLPVLRQYFAGSLKDAAKSIGVCPTTLKRICRQHGITRWPSRKIKKVGHS  
L RKLQLVIDSVQGAEGA IQGSFYSNFPELSSSGNSSFSLKMENSKQSNAIPETSGLFIQGSSTLSKSPSSCSQN  
SGPSIFCPSGAKQQNTTVNTLSTGETLMREN PVGV LQMMGCTEVNLHAMSQQDLSLLQGVESFKSFGSHPG  
L ETLPILPESSSHNSQYGGALRVKATFGDEKIRFSWQQNWTFGDLQLEIARRFNLD DINRVDLKFMDDDGEWVL  
LTCDA DFQECIDIHRASESHTVRLCVQHASNPCLGSPFGNTSLS

>Casuarina\_glauca\_Casgl103S06587

MPGPKDPKSTGLTAE EQPQEEEEEEEEEEEEEDRLERLVMDFDLDDSWPLDQILL SNGNNDKSPSS  
MSPFYLS CSDQPVSPLLAFVDGGDDAVHVASASPDSSLLSRSPNFITEMPMENVNRRFPSPFMGLKPLDDL  
DGYCVIKERMTQALRYFKDLTEQNVLAQVWAPT KYGGRDVLTTSGQPFVLGPHSNGLHQFRMISLGFMFPVD  
EEKDGVPGLPGRVFRQRLPEWTPNVQYYSNKEYPRRDHAEHYNVQGSLALPVFDPSGQSCVGVLELIMTSPKI  
HYAPEVDKVCKALEAVNLKSSEILDKPHIQICNEGRQNALAEILGILTEVCETHKLPLAQTWVPCMHRSVLAHGG  
GLRKNCTSF DGVCMEQVCMSTTDVALYVVDARMC GFREACVEHHLQKGQGVAGRAFSSHGLCF CGNITRFC  
KTEYPLVHYARMFGLASCFAICLSSTFTGDDDYILELFP SITDFYEQQILLASLLATMKGHFQSLRVASGIELDKE  
VSVEI IQVSADERVDSRLGSLRVPVSMKSPTRPEGLLNNGDTVQLKSSQQQLMLHSNGIHDKGATAKNGVGS  
I NHFSSLENKEMKKTSEKRGKTEKSISLEV LQYFAGSLKDAAKSLGVCPTTMKRICRQHGISRWPSRKINKVNR

SLSKLKRVIESVQGAEGAFGLDSITPSPGPVPVAVDSQPSRLNRSSPQTSPSTKLSEPQKNNELLAGRPLKNDEEV  
GNQEEDQLHRQRLLSPKNDIRDHSRSTSEPGKGSNRSKTRSGSCEESAGTPTSHGSCQGTPLNGRTMPKNQYV  
SSVNEQCIEVARSPGLAYEPPGEPICISASYLIPTTLLMPETQETFGGMLIEDAGSSKDLRNLCPAVADAMLEEQLP  
ELCRTNPPYPSTAPNQPMAPPVHTTTPHVMTAMNEMKSVTIKATYREDIIRFRISLSSGIMELKEEVAKRLKLEIGTF  
DIKYLDDDQEWVLIACDADMQECMDLSRSSASNIIRLLVQDAMVNLGSSCESSG

>Casuarina\_glauca\_Casgl177S10285

MAGQTLNGWWPKHELVIKDEEPFFFPSQMPSVDVRKKDYISHLCIFCGSGYSALDWQYDLPIEESFLDAVPLM  
EGFPTDPLYEQVDLESTTSLIQEDAFRGYETRVGVWNDMANRFEHKNQALPLCDSGNKGKPEMVEGKTKRCR  
EERCSSSTLSRTVISQYFYMPITQAAKELNVGLTLLKKRCRELGIIRRWPHRKLMSLQTLIQNVKELVKEEGEESEA  
KLRLDALEILERKKMLEEIPDLQLEDNTKRLRQACFKANYKKRKLTMNSLSRSSNRSSADDVMADDRMNED  
EDEYLFDFSFSSSIMF

>Casuarina\_glauca\_Casgl618S20178

MENSVSFDGTGNLNSDFSELINFDNYPGWCSSPGATDQFFSYNVSPSVPVPCGLALDALDLTEQNTGSFP  
VNRVCGTFNPVGNISFGPGDKMLFQHMDAQYGFVPDASVGNDSAVAQNGSLQQNNGSLQQNNELDMEN  
CLIPRPLSTSVEEKMLRALSFLKDSSAGGILAQVWVPMRVGDQYVLTTCQPYLLDHMLAGYREVSRFTFPAER  
RSGCVLGLPGRVFLSKVPEWTSNVSYKKGEYLRVDHAANHEVRGSVALPVFEDPETCCGVLELVTTKEKSNF  
DAEMDTVCNALQAVNLTTTLPRLQPQCLSKNQRAVLAEIFDVLRAVCHAHRLPLALTWIPCCYIEGVGYEIGRL  
QIRGARTNSGEKHILCIEETACYVNDRKMEGFVHACLEHHLEEGQGIAGKALQSNHPFFSTDVKSYSIDSEYPLVH  
HARKFDLNAAVSIRLRSTYTGDDDYILEFFLPVNMMSGSSSEQHLLNNLSGTMQRMCKSLRTVSDAELLGAGGS  
EVEFPKGAAQHFPMAIPRRNSQIILSDSDVNSIEKIPLNVSDTINDGFEADSPPEQAISGSRRQEKKRSTAEKNV  
SLNVLQQYFSGSLKDAAKSIGVCPTTLKRICRQHGISRWPSRKINKVNRSLRKIQNVLDSVQGVDDGLKFDNT  
GEFVATGPVVPESDSPKLLFPDKNLCAKDGKCSFNENAVSIIKLESDDCSVGDQVEFSSGKHITNVSQVEPMK  
YNVSLVDCSEDPKLVAIEAPRALPEKASLGSSLANRSKEWGLHNGSLKFENPDSHFVARSSDSLADEMGTGVG  
GDDDMVEPTQSSSSMTDSSNASASTMHGSSSSMSFEDQKHSKVKSSCADSGSKIIVKATYKNDTIRKFKE  
ASAGCFQLYEEVARRFKLQNGTFQLKYLDDEEWVMLVNDADLQECVEILEDIGSRSVKFLVRDTPCNISSSGSS  
NCFLVGGS

>Casuarina\_glauca\_Casgl328S15836

MKVAEHPPGSKRRTPTSKPIFQPCADFLSSCELIRSLHVYRSEDGKEYEVGREFLVSAGGSYTEMEDIAHPALILL  
NFRVSEVFEGLLNGFWLCIFAFHADCPPCSTCIPSLTMSRYPPNSSSDETHHKPGKSMRALYQDLNCLPYPIAM  
PRLSEDKQKEHSPPGIVQSKKKRAASESVARIALSDLVKHFDLPIVEASRNKLVGLTVLKKKCREYGITRWPHRKLK  
SLDNLIQDLQEEAKRQEREDAAAMAVAKRQRMLESEKENIERKPFIELKSETKRFRQDVFKRKHRRALGLTG  
PPGSSDNGRE

>Casuarina\_glauca\_Casgl64S02453

MTDPRAVVPHYDHPYDQQLPEDILTFMDDANPTLADVSYIPTMPPPDFDPFGNSVLWDMCNVSNNEARNSQ  
AGPSEVHAGTSNTEGAYVESQRPSGGNMRPLPIWPTEPIPFSCSCCQVLREIHTNGTCTKKLEIHGRFGMICA  
ILSSLQNVIVNSSSNQYQMFDFCKKSIEDVKHFLVNYCIEQNLAGFVMVQDPLAIFYEALCVGLDWEDLLADD  
FFQSSPSDSEQRERAGKLTLDQVACYFHLPIEEAARRMKLCPTVLKKICRRDGMNRWPHRKVRSIQRQISSLTAG  
LDSNNPEVKANAEAMDRLQQLTNVCAGVVSNSLYEECNLPPRSRID

>Cercis\_canadensis\_Cerca9S31548

MDYSRPTLTTLIVFMNTIREELIRSVHVYRLQDGKQSEVEREFYFSGSGSYAEMRASPLRLQKFRASEVLEGYQN  
GVWLCIFSFHADHKPPFGSIPSLLLVTRNPKLRTIPTLFNDLYLINKLDCRSEGVQIQLPEERFQANGNDDHPSK  
IILPVLDDQDLNCLPYSVDMSELPDNGLVDESLTGNIKKRRAATAHIKKIDLPVLKYFDMPIVEASRNLVGLTVL  
KRKCREFGIPRWPHRKIKSLDNLINDLQEEAKQKQEPENEAHAVTTTRQRMLESEKENIERKPFMDIQSETRKF  
QDVFKRRHKARAKQSSSVSST

>Cercis\_canadensis\_Cerca20S17733

MDYSTEFDFPKIENSQGFDSFYQVEQQESMHLRVMEFSPFEGFFDLDVPLPHQREQLCFNEFPNLEDFSSNF  
ASLEYNLPLYEDLAIDQKPLSIISPSPPAHCVANNFNELSMIVASGSSNSCKNEEREETRSNGRRKRTCSLE  
LDEIRNHFDVPITKAAQKMNVLTLKRRCRELNIMRWPHRRIKSLKSLINNVKELGLTEEVAMLERHKMLVEKL  
PDMELTEETKRLRQACFKANYKRRRYLAIQA

>Cercis\_canadensis\_Cerca58S27147

MGDGAVSPGTLLEAPPESAMDFDYMDELFLDGCWLETTTEGSDFLQTPTCNPLFDPSFSWPVLETNGVLSL  
SPSHNGNQEERQSPLFNESQETPFNAQPVSDISNIEGSCSQSEFHSVEGSEVVTRWWIQPTPTSNPGPASSV  
MERLIRALVYIKDFSRDKDVLVQIWVPVNRGGRIQLTTNDLPFSLGSTCPNLSKYREISEKYQFSAEDESGLVAGL  
PGRVFRGKVPWETPDVFRFRSDEYPRVDHAQEYDVRGTLALPVFEQGSRSCLGVIEVVMTTQQIKYRSQLESV  
CKALEAVDLRSSEISSIQNVKEACNESYEAALPEILEVLRACEMHKLPLAQTWVPCIQQSKEGCRHSNDNYLHC  
ISPDHACYVGDPSVQAFHEACSEHLLKGQGVAGGAFMTNQPCFSADITSMSKTEYPLSHHARMFRLRAAV  
AIRLSIHSSRDFFVLEFFLPLDCIDGEEHKKMLTSLSMIIQRVCHSLRVISNNELEEETRLVDEVIAPADGVSART  
ATWMDLQQSGTVASLRATAEKSETIGKFSDLQQQQDSTFDEGSLSSVGISKTGEKRRTKAEKTITLQVLRQYFA  
GSLKDAAKNIGVCTTTLKRICRQHGIKRWPSRKIKKVGHSLRKLQLVIDSVHGGSAAFQIDSFYSNFAELASPMLS  
GTSLLSAKQNDNPNPSTTEPEPGMLSPPSKSPSCSSCSQSSFSHSCSSISEQHHLTLTQNVASRKDPMVGEDCSDC  
VLKRVSEAEELKGSSLDGAKVLPRSQSQEALGQHPKNEFLRPRTHQVAQKEDAYRVKVITYGDEKTRFRMPKNC  
GYQDLLGEISRRFNINDMRKFDIKYLDLDDSEWVLLTCAADLEECIDVCHSSQTRTIKLSLHVSNNHKYRNRSLFVVG  
ENYAGHYVPQLAELMLQFNKKDKLFNLKGIAIQRTECSHLFVTTTHVTLDCISSVFSQTKILNPQMYNRLPSR  
LVGVRRWSAHSNVLDYELLDLEIPTITVVGKLVIRAGIPVLVYSGDQSDSVPLTGTTRTVIHQLAKELGLKTTLPYRGL  
VGGWTQVYGNILSFATIRGASCEAPFSQPQRSLVLFKSFLEGRPLPEAF

>Cercis\_canadensis\_Cerca93S11435

MSESEENPELAPKSKTPEDPECCMEFDLDLESSWPFQISFVSNPTSPFLIPPSSEQPSSPLWAFSDVDDDRHA  
RVSASSFSDCNRLFSCNSNSTPEAPTENDDGKKNLSPLVALPLENPDGCCLIKEKMTQALRSFKELTGQNVLAQ  
VWAPVRNGNRYVLTTSQGPVLDPHSDGLNQYRTVSLMYLFSVDGENDGILGLPGRVFQQKLPEWTPNVQY  
YSSREYPRRNHAQHFNVRGTLALPVFEPGSGQSCIGVLELIMTSQKINYAPEVDRVCKALEAVNLRSEILDHPNT  
QICNEGRQNALAEILEILTVCETHKLPLAQIWWPCRHRSLAHGGGLKSCSSFDGSCMGQVCMSTSDVAFYII  
DAHIWGFREACVEHHLQHGQGVAGRAYLSHDMCFGNVTHFCKTEYPLVHYALMFGITSCFAICLRSSHTEND  
DYILEFFLPPKITDFYEQKTLGSLAIMKQHFQSLKIASGVELEEYSSIEIIEATNESVYSMFESIPISQSTKSPPGDIS  
PKVGEMELLDSEQQTMMYVDDIKGEGTLVDNTGGSIDQVSSLETKNIKKPSERKRGKTEKSISLEVLQRHFAGS  
LKDAAKSLGVCPTTMRICRQHGISRWPSRKINKVNRSLSKLKQVIESVEGAEGAFDLNLSLSTPLPIAVGSFPEP  
SNKFNQSSSLSTGPSETQMKENELDVQVPEMNRRQVGVEDQLLGTIGSSEKVIHDKVGSPQEFSGKPNRSAT  
RSGSSEDSANPTSHGSCQGSPPNENSPAKDTFIAANNEQCVVEGGSPELNMQPTNKLNSPTAYSIPDLVATEPQ  
EPFGGMLIEDAGSSKDLRNLCPVADAIVEDQVPEASGTNPLCSDLAPKLCINTLGNTMTPSAAMREMKSVTIK  
ATYKQDIIRFRISVTCGILELKEEVAKRLKLELGTFDIKYLDLDDREWVLIACYADLQECMDISKASSSKIIRLLVHDIA  
NLACSYDSSGE

>Cercis\_canadensis\_Cerca90S30910

MEYPFSPKGGIGYWTSPRAQLEGSTSLDGIRNSISEDVLNNFSELMMSFDTYAGWCNPSVNEQILANGFSSF  
APYASSDGFNLVEQSSGAFFMTEVSGNYNTMGSSPNIGEKVEFQQVDTQLGFSDDANDANNLNSKQNNGSF  
QQNLNTLDLGNIIIPRSPGWSLDERMLRALSFFKESAGGILAQVWVPIKQGDQFILSTSEQPYLLDQMLAGYRE  
VSRAFTFAEEKPGSLPGLPGRVFISKVPEWTSNVVYNNKTEYLRVEHAIDHEVRGSIAPVPFDRHSEMPCCA  
ELVTTKEQPDFDRELEIVSQALQVVNLRTTMPRLLPQYVSNNKRAALTEIIDVLRVCHAHRLPLALTWIPCCYI  
EGVGDEITGIRIREDDSNSSEKGVLCIEESACYINDRLMEGFVHACVEHHLEEGQGIAGKALQSNHPFFYPDVKT  
YDISEYPLVHHARKYNLNAVAIRLRSTFTKDDDYILEFFLPVNMGRSSEQQLLLDNLSGTMQRICRSLRTVSDAE

LSGREGSQEGFQNEKAPCFLSMSRRNSQJALIDGDHDSIGKMPLKASNLRNNGIEAAHNQVMSGPRRQVEKK  
RSTAENKVSLSVLQQYFSGSLKDAAKSIGVCPTTLKRICRQHGISRWPSRKINKVNRSLKKIQIVLDSVQGVGGL  
KFDPSTGGFVAGGSIIQEFDHRSLLFSEKSMPVKDPELVTQDAVAVPLVPCTEHDNLVIKMEEDDVYLTSGNQF  
VHSRSLVTHNSCEGELKKVNASSVDCSEDSKSMAIGDGSCHTARLGTKDQDCPDQACLGSVLAKKGDKWGQN  
RGGLGLENANCDIVSQSSSSLVAGGIENGVDGDDGIVDHSHPASSMTDSSNGSGSMMHDSSSGSQSFENQK  
HSKVKSTCVDSGSKIIVKATYGEDTIRFKFDPSAGCFQLYEEVATRFKLQNGSFQLKYLDDEEEWVMLVNDSDLQ  
ECLDILDDIGTHSVKFLVRDLFPVLSSSGSSSCF

>Cercis\_canadensis\_Cerca189S06512

MGDGAAPP GTLLEAPPESMDFDYMDELFLDGCWLETTTEGSDFLQTPSTCNPLFDPSFSWPVLETNGVLSL  
SPSHNGNQEERQSPLFNESQETPFNAQPVSQDISNTEGSCSQSEFHSFDGSEVRRWWIQTPTSPNPGPASSV  
MERLIRALVYIKDFSRDKDVLVQIWMVPVTRGGRIQLTTNDLPFSLGSTCPNLTKYREISEKYQFSAEGESKVLVAGL  
PGRVFRGKVP EWTPDVRFFRRDEYPRVDHAQEYDVRGTLALPVFEQGSRTCLGVIEVVMTTQIKYRSQLESV  
CKVLEFNDWRKVINLQAVDLRSSEISSIQNVKEACYESYEAALPEIQEVLRCACEMHKLPLAQTWVPCIQQSKEG  
CRHSNDNYLHCISPVDHACYVGDPVQAFHEACSEHLLKGQGVAGGAFMTNQPCFSADITSMGKTEYPLSH  
HARLFRRAAVAIRLSIHSSRDDFVLEFFLPLDCNDGEEHKKMLTSLSMIIQVRCHSLRVISNNELEKETRLVDE  
VIAPADSVSGRTATWMDLRQSGTVASLRTAEKSSETIRKFSELSQQQDSTFDEGSSSSVGISKTGEKRRTKAEKT  
ITLQVLRQYFAGSLKDAAKNIGVCTTTLKRICRQHGIKRWPSRKIKKVGHSLQKLQLVIDSVQGGSAFQIDSFY  
NFAELASP NLSGTSLLSAAKQNDNPNPSTTEPEPGMLSPSKSPCSSCSQSSFSHSCSSISEQHHLTLTQNVASSK  
DPMVGEDCSDGV LKRVSEAEKLGSSLDGVKVLPRSQSQEALGQHPKNQFLRPRTHRVAQKEDAYRVKVTYG  
DEKTRFRMPKNFGYQDLSGEISRRFNINDMSKFDIKYLDDESEWVLLTCAADLEECIDVCHSSQTRTIKLSLRVS  
NHC MR RRW

>Cercis\_canadensis\_Cerca306S07940

MLFSGNIGNEYFAVDWAYEFFTQDNISDAFPLMGSPDPYETLAIPTSSLKVADDDFYAIKNGLAVWNENDV  
FSDSKQTL LCKNGENGKEMQEDRKVKCREERMSSTRMLSRKTISEYFYMPITQAAKELNVGLTLLKKRCREL  
GIRRWPHRKLMSLQTLIKNVQEIGKEEGQESEEKLRNAIEILEKEKKLLEKPDQLQLEDYTKRLRQACFKANYKKR  
KLMGMEMGSMDDLQCSSLCGHERRDEDVYINDEKEQDINS LVPDAHSSYNIMF

>Chamaecrista\_fasciculata\_Chafa97S13327

MSIDGVVSSGTL LERPSDSSMDFTYMDDELFLDGCWLETTTDASGFLQSPSSCNPHLDHSFSWPALEVEERQS  
PLFNEFQETQERINNNNTGEVCNQSENHSDENSEVVTTRWWIGPMANLNPQLSVLERLIKALVYIRDFNKDKD  
MLIQI WV PINN KAGR KILTSDLPFSLETRCPNLAKYREISEKYQFSAEEDCKVLVAGLPGRVFIDKVP EWTPDVR  
FFRDEYPRVDHAQEYDVRGTLALPVFERGSRTCLGVIEVVMTTQIKYFSELESVCKALEAVDLRSSKLSSMQN  
LKACNNSYEAALPEIQQILRSACEMHKLPLAQTWVPCIQQGKEGCRHSDDNYLHCISPVEHACYVGDP CVRGF  
HEACCEHLLKGQGVAGGAFMTNQPCFSTDITSLSKTDYPLSHHARILGLGA AVAIRLSIHSSVDDFVLEFFLPV  
NCTDSEEQKKMLTSLSMIIQVRCSLRVITDKELEEETSISMDEVIASADSRSAKMELQQSRTDEKASETGNDRQ  
LSDLGQQEESISKGNLDYVAECSTIGGEGSLPIVGVS KMGDKRRTKAEKTITLQVLRQYFAGSLKDAAKNIGVCTT  
TLKRICRQHGIKRWPSRKIKKVGHSLQKLQLVIDSVHQGASSAFQIDSFYSKFELASPKLPVSSSLFSTWKQIDN  
NNPNPNSSTCLQSP EAPSSSSCSQSSSSSHSCSNTPEQHHQH QHYNTQSV DGIKDHHSVGEDCENGVLKRIT  
SEVELKIFSQDKSELNLRRCQSHETLGQLPKTALKGSSGTHKTPDQAQSQRVKVTFGEEKARFRMPGTWGYQH  
LLREIATRFNIDMSKYDLKYLDDESEWVLLTCDADLEECIDVCSSQSSTIKLCLQVSRTLGLHDCKS

>Chamaecrista\_fasciculata\_Chafa5640S24365

MECPSPPMGKPIGYWTSSRALLEGPTPFDCVMSNSYSEDTRDSFSEPINPDTYAACWSNPSMIDQILANEFSS  
FYSIPYISPGEDLVDQNGSFY MADVGANCNALRSSSSPG EKAVIQQTDAQLGFLDDANYLSSKQQMNNGSFQ  
QLNTSDTDNYTMYRPPVCSLDERMLRALSFFRESSGGGILAQVWVPIKLGDEFILSTSEQPYLLDQMLAGFREV  
SMTFKFSAEGKPGSFPGLPGRVFISKVPEWTSNVGYNNKTEYLRVEHAINHKVRGSIAPVPFDHHEMPCCA VL

ELVTMKEKLDLDFRELGIVCDALQVANLRTIMPPRLLPQCLSNDRKRAILTEIMDVLRVCHAHRLPLALTWIPCCYI  
DGHRDETMRIKIKEGYFNSGDKCVLCIEESACYIKDKVMDGVFHACVEHYLEEGQGIAGKALRSNQPFYFDPVK  
AYDISEYPLVHHARKYNLNAAVAVRLRSTNTNDYILEFFLPVNMGRSGSEQQLLDNLSTCMQRICKSLRTVSDA  
ELSGIVGSPVRFQRKQVSGVVPKSRKNSKIASTDGDPDSVKKMPLKTSNLRKLDYEAHNQEMSGSRRQVKQK  
RSKTKKNISFDVLQQHFSGRLRDAAKNIGVCSTTLKRICRQHGISRWPSRKISKVNRSIKNIQTMLDSVQGVKGG  
IKFDPSQGSFVAGGSMIEEFDARSNLQFCEKVTPVEDPRQDGFVRRHSSSLVAGEMENGGVPEEHNHITSSTM  
TDSSSDSSSEVSASSWSGSDNIENQKHSKAKSMMLDGGGVYKIIMKATYREDTIRFKFDPSVGYLQLYEEVATR  
FKLQSGSFQLKYLDDEEWWMLVDDSDLQEFTEMVDDARRRSVKLLVCDMPVCVSETSLQATKRDTL

>Chamaecrista\_fasciculata\_Chafa8161S27192

MSESEENNYVLLPPKSKPATEEPGSMVDFDLDESSWPLDQLSFISNPFSPFLVAASSEQPSPLWVFSVDVDD  
KPARLAASAFSDCHRLPCNSNTVAEKPAESEKQLPSPSVALPPLENDGYCLIKERMTQALRYFELTEQNVW  
APVKIGNQFVLTTSGQPFVLDPHSNGLYQYRTVSLMYLFPVDGENDGIQGLPGRVFQHKLPEWTPNVQYYSR  
EYPRLNHAQNYNVRGTLALPVFEPSEQSCVGLELIMTSQKINYAPEVDKICKALEAVNLKSSEILEHPYTQICNE  
SRQNALAEILEILTVCETHKLPLAQTWVPCRHRSVLVQGGGLKKICSSFDGSCMGQVCMSTTDVAFYVVDGH  
MWGFHEACAIEHLQGGQGVGGRAFLSGNMCFCGNITQFSKIDYPLVHYALMFGLTSCFSICLQSAHTGNDNY  
ILEFFLPSKITDFTEQKTLLSILATMKQHFQSLKIAAGFELEEEASIEIEATNEKVYSRLDCIPLTQPSKLPPGPDALP  
NMERMPLDCSEQQIMYYDDINGGANLGDNAGGNFDQISSLETKTVKKPSERKRGKTEKSISLEVLQRYFAGS  
LKDAAKSLGVCPTTMKRICRQHGISRWPSRKIKKVNRSLSKLKRVIESVQGAEGAFLNSIGTSPLMPVGSNAE  
PSTPNKLSPPQTKENELDATKVSNTNRQARVEHGLPGGGRVHSPEAAIHDKSGSSQEFGKRRKGSRTKSGSSE  
DSAHFASHGSGHSSPQNESSPSKDIFIATNGEQCVAVGGSPPELKLQPIKLSNPPAYPIPLDVTELQKPFGGMLI  
EDAGSSKDLRNLCPADANLEDQVPEACGTNPPCSDLGPKQCPDTLSHTVLPFAAMREMKSVIHKATYREDIIRF  
RLSLASGIVELREEVAKRLKLEVGTFDIKYLDLDDQEWVLIACDADLQECMDVSRSSGGSIIIRLLVHDIASNHGISD  
TNRQARVEHGLPGGGRVHSPEAAIHEKSGSSQELGKRRKGSRTKSGSSEDSAHFASHGSGHSSPQNESSPSKDI  
FIATNGEQCVAVGGPELKLQPIKLSNPPAYPIPLDVTELQKPFGGMLIEDAGSSKDLRNLGIVGA

>Chamaecrista\_fasciculata\_Chafa93653S04837

MEISPWEDFGEMSLVPFYSNPLCFNQFPELENFTSDFKTLDNYNLPPFPESIVFEEKPKPLAQGYFLPANSQT  
HIHLPSLMGETSASSIMNNGFGSCVKYVKEEQNDENQRMNSMTTLRKNKTTSEFNEIRKHFDPITKAAKRM  
NVGLTLLKRRCRELNITRWPHRRIKSLKTLIYNVKEMGLTSEVEMLEKHRLVEGRPDLELDEKTKKLRQACFKAN  
YKRRRLLAFQS

>Chamaecrista\_fasciculata\_Chafa93653S28208

MEISPWEDFGEMSLVPFYSNPLCFNQFPELENFTSDFKTLDNYNLPPFPESIVFEEKPKPLAQGYFLPANSQT  
HIHLPSLMGETSASSIMNNGFGSCVKYVKEEQNDENQRMNSMTTLRKNKTTSEFNEIRKHFDPITKAAKRM  
NVGLTLLKRRCRELNITRWPHRRIKSLKTLIYNVKEMGLTSEVEMLEKHRLVEGRPDLELDEKTKKLRQACFKAN  
YKRRRLLAFQS

>Chamaecrista\_fasciculata\_Chafa1046S13677

MADPRSIVPYHDPYDFPLPRSIYDIGNDQNPTLADLSSSLPQPLHAIYQQGSDNAPNLIQDTLHNFSHHQAG  
PSQVHEETHGTGQDYSGSQNFAEVVQLSFWEPPVPFICSCCQVLRIVHTNGLMFTKLEIHGRLGMICHAIQQ  
KSNITNAASSTDHQIHISIEIKNFLTQYWMQNAAGYFVVQDPFSAYYEALCVGMDWTEDIKDELVDMMNVND  
NGGTSDDAEDPEKNPKATCLATQRERAGKMTLSDFSDFHLPIDEEAAKEVNLCPVTVKKICRKAKLARWPHRRI  
KSIVKKINILRGTNAEDAMAKARNEAEIARLRQEMIECCGGVVPTALNLD

>Chamaecrista\_fasciculata\_Chafa2145S18426

MHHRTPKPNTNSLEQHKDWEMQHQQEEYMYGGGEVVENCYGRLECEAIPEAALIDELLVQGCWVEASGVIS  
HHVNQQQYMSHQNNQKWWIGPISSSVKERLLVAVAYLRHHYYTNIQNIQIWWPPSPTNLHPHYAYDDHE  
ANTEDVTSVFLPKLLQYQYWITPINNVRRFRTHHCYPHSINYKDDGGAASLPVFQRGSGACLVGLQILMDHQS

NNINYPQPQLPPCNHVELKSGHQNLIPPAATNNKVTNWEVERGAIIEEIEILRSVWKTNLALVLTWGPCI  
QQGKSGCSSEECVSTVDCACLVGDVDIVGFQEACSEWHLLGRQGIVGTALTTTKPCFATDISGFSRAEYPLALHA  
TMFGLHAALAIPLYFRTNTATADVFLEFFLPKDCRDSEQQREIVKSLCMVVHQAACRSNLHVEVVGFEQDHDD  
HELMKEKQTESAVVSSIWQLEEAKQEFKLTSSRKSGDKRRTKAEKTITPLLRQYFAGSLKDAAKSIGVCPTTLKR  
ICRQHGITRWPSRKIKKVGHSLKKLQVMDSVEGVEGAIHIGSFYSNFPQLTTSSASWNHHNNSQSSNSNNIIT  
NTNTINYNYGNEGSTSLTKSKSSPSSCSGSANYNNAEDAGLNRSHHMYTESFSFRVKASFGDENIRFSPPNWG  
LRDLQMEIARRFNLNLNDVLTNVDLKYLDDDGEWVLLTCDADFECKDLHLHTTPSSSHSHTTLIRLSLFQPPA  
LPSNLPNSLHQLYQYHF

>Chamaecrista\_fasciculata\_Chafa10125S05853

MAWTSKYELDEVVFPYDLWGNSENGYFGLDYWPYGSALPWMEPDILYETLAIETPLPSMQDNEFYDIGKGLA  
VWNEIDAGFDSEKQPVFLCKNEESGMMEMKEENGEMKRSCREERGCSIKLLSRKTISQYFYMPITQAARE  
LNVGLTLLKKRCREVGIRRWPHRKLMSLQTLINNVQMLGKEGGEGSEEKLRNAIELLEKEQKMMEEEPDSQLE  
ENTRRLRQACFKANYKKRKLMSGYHTSTSGDQYCTTNECYNEQIQDMNNVLACFN

>Chamaecrista\_fasciculata\_Chafa4076S22354

MEEYDGAFFESLSESAASVSSEVSLVMDFIDDLVHGCWLETSSYINNNFNNSNNNHLLPFTNCIIPSSSSSSFTT  
TSHYYPNNNYLQHYCFWTSSDNSSSSSTTSSEIYHHQHQQQQLSFVLENITTSNTNTNDELVLGKRWVIG  
PKANPGPSSSVKERLVLAVGCKELYTTTNNNNNNNNNTANKNNFMIQIWVPPHHHEDYRKLHHHNDYGG  
GGVVRFFRSHEYYPYANYLVNGSQYYDNVRGGPCLALPMFERGSGTCLGVVEILLTHHHANHHNNNNININ  
SNLSHNLQAVDFRSCQNFIPPPMKVFDEWYQAALNEIVDVLSTVCKTHNLPLALTWAPCVQQNKTGCPHNTN  
NNNNNNNTSSDDQIHQNNNNYMWCVSTVDSACYIGDLDLLGFQEACSEYHLFRGQGIVGTAFSTAKPCFATDI  
TAFTKPEYPLSHHATMFLGHAAVAIPRSSVYTGSSDFVLEFFLPKDCDIEQQKQMLNSLSIVVQQACFRSLHV  
VSSQVVDNQEAEFMFNNNNVREILKGSSGIHKEETLDFGSQSSEEHPSKESWIAHMMEVQNQQKGKGV  
VSLEYLEPKQEFKVTTNWDISGSHHGGLCHNGQVFSSDFGQVHQQQSSASRATVEGGGESYSYGGRRSSG  
GRKSGEKRRTKAEKTISLPVLRRQYFAGSLKDAAKSIGVCPTTLKRICRQHGITRWPSRKIKKVGHSLRKLQVIDSV  
QGAEGAIQIGSFYSSPELSTDLSSGVPHSSQSPSNNISDHSKTHHHHHHHQHHTTEITNGLLKSPSCCSQTS  
TIINNNAINNNNGDIIMTENPEALINSRVHTQNHALIEAELLEDAKHNNHHHHLEALPPLPAEITTHGGAFRVKA  
TFGDEKIRFSLQPNWGFRELQMEITRRFNLNNNNINHDVMMNNFDLKYLDDDGEWVLLTCDADLEECKDIYRS  
SQSRTMRFSLFQASPMNLASDTFGNTSSSPS

>Chamaecrista\_fasciculata\_Chafa571S24484

MEYPFSHKEKDEHSTSQAQLEGSTSLDGGERNLISEDMLNTFSELMNFDYAGWCNNSATDPVSDNGLSSF  
TSVPYASPDRFNLMEQSSGPFPMNDVNRNYNGIRSLPNSGEKLVCCQMDTQLGFSDDANDADNFNSKQHIN  
HSYKQPDNLEVGNMIPSPPGWSLDERMLKALSFKESAGGGILAQVWVPIKHGDQFILTSEQPYLLDQMLA  
GYREVSRITYTFAEGRPGSFPGLPGRVFISKVPEWTSNNGYYSKTEYLRVEHAINHEVRGSIALPVFDPHSEMP  
CAVLELVTTKEKPDFDRELEIVSQALQVVNLRTTMTPLRLLPQCLSNNKRVALMEIIDVLRAVCHASLPLALTWIP  
CCYTEGTSNGTTRIQIREGHLSFHEKFILCIEESACYVNDRPMEGFVHACAEHHLEEGQGIAGKAIQSNHPFFYP  
DVKAYDIVEYPLVQHARKYNLNAAVAIRLRSTFTNDDDYILEFFLPINMRGSSEQQLLDNLSGTMQRICRSLRTV  
TDVELSGISGSQVDFQNEKVHGFSLTSRRNSPIELTDGEHDLVSGISLKAPNLRNDGIEASQSQAQVSGSRKHVEK  
KRSTAEKNVSLSVLQQYFSGSLKDAAKSIGVCPTTLKRICRQHGISRWPSRKINKVNRLKKIQTVLDSVQGV  
LKFDPSTGGFVAGGSIIQEFDVHSNMLFPEKSMHMQDPESVAKDGVSVPTLPCDEGENSSIKLEDNDVMEG  
NRLMNLRDVLIPSCDERELKKANVFSVDFNDDSKLMTLDDAQYCPEKACLGSPANEGKRKGLNKDGLGVKIN  
SRDVVSWSSGSLIADEMENVVDEDNVEHNHVTSSMTDSSNGSGSMNHGSSSCSQSFENQKHSKVKSTVVD  
RGSKIIVKATYKEDTIRFKFDPSAGCFQLYEEVATRFKLQNGTFQLKYLDDEEEWVMLVNDSDLQECLEILDDVGA  
RCVKFLVRDMPCLSSSGSSNCLGDS

>Chamaecrista\_fasciculata\_Chafa95053S28562

MEDGVTKPAVTTTPEPPPESSMDFDDVNELFFDGCWLETATTGSDFLNLTSSSNPLFDSSSSWPAMDSNGG  
FSRQKEYSKEDIMKQSQSENNSVEGGEELEEVRWWVVGPRASPGPASSVMERLIRALVYIKEQNKHKEDALIQI  
WVPVNKEGRRIIRTTDLFSLKTPNLAKYREISEKEYEFSGEQGMASGLPGRVYVGKVPWTPDVRFFTSDEY  
PRVQYQNYDVRGSLALPVFEQGSTTCLGVIELVMTNHHIKYRPQLETLCALQAVDLRSSNISSMQNVKLQGL  
GCNKSYEGVPEIQEVLRSACDMHKLPLAQAWVPCLQQGKEGCRHSDDNYLHCISPVEHACCVGDSSVQGFH  
EACCEHHLFKGEGIAQAFLTNQPCLDVTSFGKTEYPLSHHARMFKLRAAVAIRLSIHHTTKDDFVLEFFLPLS  
CTDSDEQKNLLTSLSSIIQRVCHSLRVISDEEEELANILVHEVIAPTDSTSAAMMEINQSGMVALSGTQEKSSQ  
TMGRKLSEPMQKQEVSMLGGNLDGEFSTHGDNSLSSVSISKMGKERRAKAEKTITLQVLRQYFAGSLKDAAKN  
IGVCTTTLKRICRHHGIRWPSRKIKKVGHSLQKLQLVIDSVQGVSGAFEMDSLPLKASPIILSGTSLFSTYKLSQDQ  
QNPSSTQCVPDLLSTEVAASKSPSCSCSQSSISNHTCTSVSEKINVGPGNDGVLRVRSEAEKCLSEERAKFLPR  
SQSQETLGDIPKAECYLPFLKTGPEATQKKDAHRVKITYGDEKARFRMPKNWGYEDILQEIAKRFNINDIGQFDI  
KYLDDESEWVLLTCDADLEECIDVAQSCGSSTIKLRIQLSNHCMRRSRAPS

>Cicer\_arietinum\_Ca\_02703

MEYPFYHTGKGIGYWQSPGTQLEGSTSLDGGISNLVSEDMPSSFSELMNFDNYAGLCSGPSMTDQIMANELP  
ALASVLYQSSDGLNIVEQNSGQFYMTVEVGGNSNPNQSSPIYGEKIVCQQMDTLLGFLDNNDANNLSSKQKING  
SLQHVNTFDTGNCVIPKPPALSLDERMLKALSFKEAGGILAQVWVPIKHGGQVFLSTSEQPYLLDQMLAGY  
REVSRTFTFSAEGKPGCLPGLPGRVFISKVPEWTSNVGYNPNSEYLRVEHARNHEVRGSIAPFIDMHSGLPCCA  
VLELVTTKEKPNFDKELEIICRSLQLVNLRTNVPFRLPECLSSNKRAALTEIVDLRSVCHAHRLPLALTWIPCFYT  
KGTRDETTRIQUIKEGNSSSREKNILCIEESACYITDRVMEGFVHACVEHHLEEGKGVAGKALQSNHPFFYPDVKA  
YDISEYPLVHHARKYSLNASVAIRLRSTYTYNDYILEFFLPINMKGSSEQQLLLDSLSTGMQRICTSLRTVSEAELS  
GIKSLQVGFEEKNDPRFPPLSTQNSQIPSIKENNGSVQKLSLKASNQRKNGNEPSCNQETNGPRRRVEKNKSTS  
EKNVSLSVLQQYFSGSLKDAAKSIGVCPTTLKRICRHHGILRWPSRKINKVNRSLKKIQTVLDSVQGVGGLKFD  
SMGAFVAGGSTIQEIDEHESLFFPEKSTAQDPQNLNLEGKLEKTNSSSVDCSEDSKSMAMDDCHEQACFGS  
VLGKSDKLVNLNGGLRIEKCKHNNTSSFFVDEMTCVDGDDEVVEHNNPTSSSLTDSSNGSGSMIHDISSGYED  
FENQKHCKGKSTIVDGGSKIVKATYGEDTIRFKFDPSTGCFRLYEVAARFKLQNGTFRLLKYLDDEEWWMLVN  
DSDLQECLEILNDMGRNARFLVRDVPCLSSSGSSNCYLGGSS

>Cicer\_arietinum\_Ca\_09832

MEYGGGLVEDCGGFGTMVGGETDMIEELLVEGCWVEASENNLMMMHDDHMSSTTPQPHYIPMGDND  
EESGNFVVGKRWWIGPQANPGPSTSVKERLVAVGYLKEYTKNSNSNSTSNSNSNSNSNVLIQIWWPLRRR  
SGLFHNQYHNPNPVHESLPISVPNSNVQVRFFRSHEYPRVQAHHGSLALPVFERGTATCLGVIEFLIANQNLIN  
YRPQLDHLNALEAVDFTSNQNMIPPAVKVFEELYEAAVNEIVQVLASVCKTHNLPLALTWAPCIQEGGGRGK  
GGCSNSNGNSNSNSNGSNMMMSCVSTVDSACYIGDVDVLGFQEACSEYHLYNGQGIVGTAFTTTKPCFAI  
DITAFSKAEYPLAHHANMFLHAAVAIPLSVYTGSAAADVLEFFLPKDCLDTHQQKHMLNSLSLVVQQACRSL  
HLHVVMEDDHHNNHHHHLHHQHQQHQQHEEDQFTPTTNIYMPDVDAAAAAPVVVLSQVEADASASASA  
CSTKETTSSSCSWIAHMMEAQHKGKGVSVSLEYLQEPKEEFKVTTCNWEREREGNSVFSEFGQVLQQQQHEH  
QSMSNSRASTVVSVEGGEESSGGGGSGGGGRRSSCSSNGRKSQDKRRTKAECTISLPVLRQYFAGSLKDAAKSI  
GVCPTTLKRICRQHGITRWPSRKIKKVGHSLKQLQLVIDSVQGAEGAIQIGSFYASFPELSSATGHSDQSSMKLM  
HNHGVSDHHNSFYGDGGVTTSNLKSPSSACSQTVGNQNTSTLINNNVVMTESNALASTDHAAAAHAHAAL  
MQIRRTHSEAELLHHHTSNIDIQDYQLHDQDTKQLLLHFNKSQTLPPRPSTTTTTNGYNNSLERGAFRVKATFA  
DEKIRFSLQGMWCFRDLQVEIARRFNLDMMNNLVKYLDDEGEWVVLACDGDLEECKDLHTSSHTRTIRLSLF  
QASPLNLHPNTFRNTSSSPSSS

>Cicer\_arietinum\_Ca\_04456

MAESEEENQEFLPKTKTSLEEHHGCCAMDFDLLETSWPLDHMSFVSNPMSPFQFSTISDQPSPLWAFTDGE  
DDKHVKLAASALSDCHKIFSSDSNSITEKPVENDENKKHLPPLVPIENLNGYCAIKEKMTQALRYFKEWTELNV

LAQVWAPVRNGNRYMLTTSQQPFVLDDPHSNGLCQYRTVSLMYMFSVDGENDGTLGLPGRVFQQKLPEWS  
PNVQYYTSKEYPRRYAQAHYNVRGTLALPVFETSLQSCIGVLELIMTSPKINYAPEVEKICKALEAVNLRSEILDYP  
YTQICNEGRQNALSEILEILTVVCETHNLPLAQTVWVPCRHRSLAHGGGLKKSCSSFDGSCMGQVCMSTTEVAL  
YIIDPHLWGFREACVEHHLQQGQGVAGRAFLSQNMSFCTNITQFCKTDYPLVHYALMFGLTSCFSICLRSSHTG  
NDYYVLEFFLPNITEFHEQKTLGSLAIMKQHFQSLKIAAGVELGEDGSIEIIEAMDESVHIRIESIPVQSIKSPPR  
PDASPNMEEDKVPQDPSDIQGENIGGNIDQVSFLGNKNVKKPSEKRGKTEKSISLEVLRQYFAGSLKDAAKSL  
GVCPTTMKRICRQHGISRWPSRKINKVNRSLSKLRVIESVQGGEGAFDLNSLNTNQLPIVSSFPEPSTPNTSNQ  
QASLSIRPSEPQIKENGIDASKVSETNIEVVMEDQLLGGRKRSLGKEVIINDKGVVQKVRARSGSSGDSTNPISH  
DSCHGSPPIESSTIKEIFIPSNNEQCVALKGSPESRVQPTNGFNASAYRMPDNVIAELEEPPFGGMLIEDAGSSKD  
LRNLCPVAEAILEDMAPEPCGTNLPGSSYLAPKQCMDTINTSTTPFAARKEMKTVTIKATYREDIIRFRVTLTCGI  
VELKEEIAKRLKLEVGTDFVKYLDDEHWEVLIACDADLQECIDVTRSSGGSNIIRVLVHDITSNLGSAYESSGE

>Cicer\_arietinum\_Ca\_01656

MVEDQNVNNNFTFGGNNFEVGSTSIQHDNQNQPANDIPVLLNHAEVLALDQWPPAPLPYFCSCCHVLRRIH  
ANGIQFEKLEIHGRLGLITHAIHHQTPVNGDAPIYQMVDFCRRSLEEIKIFLAQYCVERNRAGYFILQDPMSAYYE  
TLCTGLDWIEDLNMEDPVDANNNNNQNNSEIVEPQEQEGENGTPTKNLSVQRKKAGKLTNDLCDLFHLP  
IEEASECVKLCPTVVKKTCKAGLARWPYRKSSEDMAASDQTLVCVKQVKQELSNEWDESMPLPGDIIEGFSTH  
NSDADESFLPVKTSSEFSSQLGKINPRLESIWIKVRRGDSLLKLQTCIVQQKGYVLRKTYTIQATTDRHRIADLGLD  
TLEQCTELQVMSSRVVQTQKGKGLHIDRIKYDWKMKVGTYPHQSSSVSSILFTPLAGEHCINTTTARCMWAF  
SASISSGVPLVFNQITELIPTIEKTNLSNMQQKHYYTAQIIHGIRLWFLPGLEEPIELIPEPNEVRFGMEINRTEEG  
FVCIYSVTGGTSADRGGKLKELHEEATANGFLLVISRLEGKSKMPTSVCSDDLHCCDHAEMKDLLVSAIDQYIEIHL  
HVMAWPNQTRSSPTQVVGFAALLPPQRSFSTHHYD

>Cicer\_arietinum\_Ca\_03992

MDFFEHQITQGSNFFYNAQPQQIDTPEDKIMDISPLDGFVDFNWETEFQRNELYISDEFKDLENFNDFNLP  
HLEQDFEVDQKPLNAVLPLQLEHCNDEGVSGFIENGFSVCKKEEEEEKEKPLSLALLSGCSSKKKRSSLLEFDDI  
KKHFNVPITLAAKRLNVGLTLKRRCRELKITRWPHRKLKSLVLLIDNLKMGGLADEVVKLEKHKMKLEKLPGIEL  
NEEIKRLRQACFKANYKRRRLIGSRP

>Cicer\_arietinum\_Ca\_04834

MEDGALTSSTMMMEAPQPDENSMDFDYVSELLLDGCWLEASADGSDFLQSSPFSNPLFDPSFTWPSLDNID  
PPDNVDRHKSQDASLGTEQESRSIVNVDGGSNQKEYRFETYSGEGFFSRWWIGPTPNSGPGGSFIVEKLIRALK  
WIKDFDRNKDMIQIWWVPVNRGDDRPFLTANDLPFSLETRSLNLARYREISVRYQFSAEEEDSKDLVAGLPGRVY  
RDKVPEWTPDVRFFRSDEYPRVDHAQECDIHGTAVPVFEQGSRTCLGVIEVVMTTQSQSNYSAELETVCALKE  
VVDLRSSRHSSLQNVKARDRSYETALPEIQEVLRSAEMHKLPLAQTWIPCIQQGKDGRHSDDNVYHCISPVE  
YACYIGDSSVRFFHEACMEHLLKGQGVAGGAFMTNQPCFSADITSLSKIDYPLSHHARLFLRAAVAIRLSIYS  
TSDDYVLEFFLPVDCNDSGEQKKMLTSLSMIIQVRCRNLRVITNKELEKNNLSANEVMDLADSGFASGATWSEL  
QHRRMAASLDGDFFFNETMGGKFSEQTQQQENLILKGDTESGRECSLSVEGNLLSSVGIREKRRPKADKTITLQ  
VLRQYFAGSLKDAAKNIGVCTTTLKRICRQHGIKRWPSRKIKKVGHSLQKLQLVIDSVQGASSTFQIDSFYSKLSD  
LASPNLSGTSLISTLNQIDNQVSLNTQPDPSLSPEDASKSPSTSCSQSSFSSHSCSSMSEQQHHTNNFASNKDP  
LVGEDSVDDVLKRIRSEAEKSLIQDNNKANVMPRSQSHETLGEHPITEYHQSLKTDKASQKEDAHVRKVY  
GDEKSRFRMPKTWCYEDVVQEIGRRFNVSDMSKFDIKYLDDECEWVLLTCDADLEECIDVQSSEISTIKLCLQP  
SSNFIRSSLEFR

>Cicer\_arietinum\_Ca\_13679

MKSSTTSEDMFNNISELMNFDYAGWCNGSSSVNDHDHSLVHEFSSFASIPYSPHDGLNLVEHINGPFFMTEI  
GGGNYNDMDNSTSYGGNYQLEFLDTNNSNETNNSDSQQGQNGSFQLLNSNNSDMCNYLIPKSPSWSLDE  
RMMSALSFKEGILAQVWVPVKYGDDEFILTTSDQPYLLDQKLAGYREVSRFTFSAEMKMGSCPLPGR

VFISHVPEWTSNVGYHSEYLRLEHAISHDVRGSIALPISDMLSEVSCSAVLELVTTKEKLNFDKELEFVSHALQR  
VNLRTIMPPRLLPQCVSINKRAALTEIIDVLRAVCHAHRLPLALTWIPCCYSEGKGEESERIRIKEGHTSSDEKCVLC  
IEESACYINDKMVGGFVHACADHHLEEGQGSGKALQSNHPFFYTDVKAYDVSEYPLVHHARKYSLNAAVAIRL  
RSTYTNDDDYVLEFFLPINMTGSSEQQLLDNLSDTMRRICKSLRTVSEAELRGIQSGDGFQKENVSGFFSLSR  
GNSQIAFTTGDQDLFQMSLNATNLKNIQGHCAQATNAPRKQIEKKRSERVEKNVSVLQYFSGSLKDAKRIGV  
CPTTLKRICRQHGISRWPSRKINKVNRSLKKIQTVLDSVQGVGVKFDPHGTGGFVAGGSIIQQIGSHKSLMFPE  
NFFAQDLAPAPITREPISVTPPPCENSAIKLEDGLKKENASSVDCIQDSTSITMHDEPCQTSWIWTKTQDCPKQ  
TSIGSVFEKQDDQCGLNKTSSFSLIEHELGGDENNQPTSSMTDSSNASGSMVRRSSSGSQSFENRKRKMK  
SVCVDSSEKFAVKANYKGDITRFKFDPSVGCFLYEEVTRFKLQNGSFTLKYLDDEEEWVMLVNDSDLKECVEIL  
SDVGTHCVKLLVRDIHGSIVTSNS

>Cicer\_arietinum\_Ca\_13151

METMPLIGWNSYTDENPFSTTYQCFPYSGNSNEYFPVTFPKEEFPNDSYLSFSVEYCNYIPDPYQSLCIEPMS  
SSLQDYDFYDVEKGFVGWSEIDAGFESEKVLNFTDEKIVNEVKEELVDVKSGGEERKCSNAKNLSRKIISQFYFYM  
PITQAARELNVLTLKKRCRELGIRRWPHRKLMSLQTLINNFQDQMKEGGLESAEKLRYAIDALEREKKVVEE  
MPDMQLEDGTRLRQACFKANYKKRKLMDPQMF

>Cicer\_arietinum\_Ca\_27191

MEYFCPEFLYETFPSTPISVQDYDFGDAKNVFMWNELDVAFYSKHESSAREISKGRCKEENSTSAARM  
SRKKISEFYFMPISQAARQLNVGLTHLKKRCRDLGIQRWPHRKLMSLQTLIKNVQEQGNENDEKIRNAVEILEKE  
MKMVEEKPDLQLEENTKRLRQACFKANYKKRRLMVMRLMDQ

>Datisca\_glomerata\_Datgl488S31230

MDDGFLSPGTMLDGPSDSAMDVDYMDELLEGCWLETDGSEFLPQTPFNSNSLFDPPFGWPPVNTGDLSTN  
PAPNTDQHEQERQVLNDTTPFLSQNAIDVAGCSGQTENQIEGSEVGRRWWIGHPGPGCSVTERLIRAVGYIK  
DSSRDKDVLVQVWVPINSGGKRVLTNDLPFLCNTSCTRLARYRDISMSYQFSAEENSKDVMGLPGRVFLGKV  
PEWTPDVRYFRSDEYPRVRYAQCDVRGTLALPVFDQGSRTCLGVIEVMTTQIKYGAELENVCKALEAVHL  
RSSDALSSPHVKVFYRSYGAILLEIRKVLRFACKTHRLPLAQTWASCIQQGREGCRHSDENYNRCVSTVDQACYV  
REPGIQNFHEACSEHLLKGQGVAGEAFLTNKPCFSSDIKSGNTEYPLSHHARMFELHAAVAIRLSIHARKAD  
FVLEFFLPVGCTDPEEQKLLSSLSIIQQSCHSFRIVTDEELREERDLPFAQVVVPLNGTPSKAEGQVGDNPISLFP  
DEKPAEVLKAAECSEELTFGEHSSSNAGMEKTGEKRRNKAETITLQVLQYFAGSLKDAKSIGVCPTTLKRV  
CRQHGIQRWPSRKIKKVGHSLQKLQHVINSVQGTSGAFEIGSLYNNFPDLASPNLSGTSPFLTNTGTAAGDGII  
NPKVAPSKSASSSCSQSSGSSSLCFSSRTHADAVIGENPGEGELKKVKSEALNVSIQEGIEIPRRSQSHKSLNELR  
PGMKNNRQMSEEEADAQRVKVTYGDDKIRLRLHRGWGYEDLRAEIGRRFNINDMSKYDLKYLDDESEWVLLT  
CDADMEECIDVYRASQSQTIKLSLQVSRFRSSIGSSFLS

>Datisca\_glomerata\_Datgl229S25120

MSDAEEDNPAAFPKPKDDQYVRTAEDQGEPIMDFDLFDNSWPLDQITPFISQPLSPILISVSDQSYSPLWAFS  
DGDGKLARYACSVLGASNLPTESANNHENEVNPNSALWGLKALENPDSYCLLKGRMTQALRYFKESTELHVLA  
QIWAPMKDGDRCVLTTSQGPVLDTQSSGLHQYRMVSLTYMFSLDGKTGVLGLPGRVFLQKLPEWTPNVQ  
YYSSREYPRLSHALHYNVQGTALPVFEISGQSCGLVLELIMTSPKINYAPEVDKVCKALEAVNLKSSEILDLPSTQI  
CNEGRQNALAEILEVLTVVCEHNLPLAQTWVPCRHRSVLTHGGGLKRSCTSFDGSCMGQVCMSATDLAFYV  
VDAHKWGFREACLEHHLQKGQGVPGKAFLSHSSCFCTNITQFCKTVYPLVHYARMFGLKSSFSICLRSTFTGDD  
EYILEFFLPCHQELNLLGSLFATMKQHFRTLKVASGRIDLNKDEVFVEIIEASMNEGLVSRVEYVRISKPTLHPMP  
QVVINEGELNLPKEQLLVDFDYQNYGSNAVHENGSLTPVNFNEIRGKRKTSKRNRGKAEKSISLEVLRYFSGSL  
KVAAKSLGVCPTTMKRICRQLGISHWPSRKINKVNRSLSKLVIESAQGGEGAFGLTSLVTSPLPVTFGSSSHPL  
QGSNQNSSSYKPEPLNKNLISKTHGNKAQPGKAVVNRSLKSGSGNENSGTQTSHTSSCQVSPTKPNLSASF  
LDPDALVLLQSNPEFGMLIEDAGSSKDLRLDICPVAADAGRPEMKTMTIKATHKEDIIRFRVPLSVGTGKLKEE

VAKRLKLEVGTDFDMKYIDDDQEWVLIACDADMEECLEDFKSSGSNVIRLLIHDLTNNVGRSYESNGGL

>Datisca\_glomerata\_Datgl973S36760

MILNWCLLTNQKKGKPNFRMEELCKLNNSKYHQPRKFPALDQDLNCLPGSVFTADRSDDRGIEFGAPGDAGI  
MEKKKKRAASEHIAKIALADLVKYFDLPIVEASKNLKVGTLVLRKRCREFGIPRWPHRKIKSLNGLIRDLEQEAQK  
WEQDNKAAMAVAKRQMMILESEKESIERTPNMEIQSETKKFRQDVFKRRHRDRALKHLDL

>Datisca\_glomerata\_Datgl151S21250

MGDGILSPATTTGNPFDFMDFDYIDELLLEGCWLGTTDGSEFPRQIPSNTSALFDPSFGWAATAMETNGNM  
NMNPTQNDDEEGGRPFLNEPHVNNTEKALSNEYMDDVAGCSSQSEKYVEGFSDMGRRWWIGPRAYP  
GPASSVIDRLIWAIGSVKDSERDKDMLVQVWVPENRGVRRVLATSDLPFSVNTSCQRLARYRDISVNYQFSAEE  
DCKEAVGLPSRVFLGKVPWTPDVQFFRSDEYARVDYAQEYGVRGTLALPVFERGSRTCLGVIEVLTQIQIKYN  
SELKIMCKALEAVDLSSTILSSPNVKALNRSYQAVLPEILEILRFACETHKLPLAQTWVSCQQGREGCRHSEENY  
INCISTVDQACYVADPHFQSFHEVCSEHHLLKGQGVAGEAFMANGPIFLNDITSFGNTEYPLSHHARMFELHA  
AVAIRLSIHTSKADFLVLEFFLPVDCIDPEKQKKMLQSLSIHQESCKSLRVITDGELREETSLLDRRELEANVNDAP  
LDKNPETASVMHIQEHGGGAVPFPDCKKPEVLTEDSPGFQLQQQNTNFKGFVESIEECSTFCEGSLSNASMG  
KTGEKKRVKAEKTITLQVLRQHFAGSLKDAKSLGVCPTTLKRICRQHGITRWPSRKIKKVGHSLLQLQLVIDSVQ  
GSSASFQIGSLYTNFSDLASPNLSRTSPFSTSVKGDHQTASNIQQDGSMINARTAASKSLSSSGSQSSSSQCCSS  
RAQQNHPPHWNIEDRVVGENSGVGQLKRARSEAEQNTTNQGLNRLRCQSHKALCERPSPENLVQISKSSG  
RLSEEDVQRVKVIYEDEKIRFRMANSWGFKDLLMEIARRFSIQDIGKFDIKYLDDESEWVLLTCDADLEECIDVY  
RSSLSQTIKLSIQLARHHARSL

>Datisca\_glomerata\_Datgl3S29876

MPEPEVDNSAAFPLKSKDYLVVRGAVDERDTLMDFDLMDSSWPLEQMSSFISNSMSPILISTTSDQPCSPW  
AFSDGDDDDGDDKLPAYACSMPTLNSNLVTQKPTENHPTRNLPIPSPLWGLTPLENSDGYCLIKERMTQALRYL  
KESTDQHVLAQVWAPVKSGGRYVLTSGQPFLVDAQSNGLHQYRMVSLMYFVSVDGGADGVLGLPGRVFQ  
QKLPEWTPNVQFYSSKEYPRLNHALHYNVQGTALPVFEPSGQSCVGVLEVIMTSQKINYAPEVDKVCALAEV  
NLKSSEILDHPNTQICNEGRHNALAEILEVLTVCETHNLPLAQTWVPCRHRSVLANGGGFKKSCSFSGSCMG  
QVCMSATDVAFYIVDAHIWGFREACLEHHLKQGQGVPGRAFLSHSSCFCRDITQFCKTEYPLVHYARMFGLKSC  
FAICLRSTFTGDDEYVLEFFLPPSITEYSEQDQLLGSLLVTMKQHFHSLKVASGIKFEEGEGVLEIIQASTNGEFEPKL  
EYIQIPHSEKLSPRSKEAPIAGQLGALNLSKQPSGVVGYDVVNYGSNGHDLGSQNPASFPQNTDSKKTSEKRG  
KTEKSISLEVLLQYFAGSLKDAKSLGVCPTTMKRICRQHGISRWPSRKINKVNRSLTKLRVIESVQGAEGAFGL  
TSLATAALPVAATSNPPLAPDGSNNQNSPAYKLYDTTAEIKESSLNSKSPGNDVQAEMEDQLLRGSIMEELILQ  
QNGFLPKFTKGSNRKTGSGSREESIGTPTSHGSCQGSPANESVLAKDPFVSPHDSPEFTFRPATCPIPGIVVVT  
TEPEESFGGMLIEDAGSSKDLRNLCPVADAVADDQVPYWPNPDPMAPIQTIDAAAHAAMPLATSRQETKR  
MTIKATYKEDIIRFRIAVSCSIVELREEVAKRLKLEVGTDFIKYMDDDQEWVLIACDADLQECMDISKSSGCSIIRLL  
IHDLTANLGSSCESTRD

>Datisca\_glomerata\_Datgl206S24145

MSSSQQQNLDKGTSINPSSQPHRPLSFDHISEYFSLSLSDAASKLGVCTSVLKKICRDNGLDWWPYRKFLSGKSI  
EDIKRYAARERYKVIARARQSKIGGRSENTQIQGVMSQNLQQQGSKKPEIGRPQNLPCPNMMKGVLTLDEF  
KYGFPSDGLSTASNKWGSSCPDGYEGIDREGAESDAEDDKKHQFEEAANDGSKSLSVIADNETNESMKDEC  
KMDQIDPQGTVLLRAVRERSVEEGRKALKGGFFCGYDVNQLGKRERTLVLIQIFRSSIRNEWINS

>Datisca\_glomerata\_Datgl1955S23745

MEYGALTVNSTYGNYTETTMELDFMDELLQGRWMDSSNGTNLLQSVSSVRALNNDSSNYVTPHEINTNHLN  
INPNHHVYEEDQANHETFLVEEVDQSSSRKWWISPRVYPEPSSCVKERLTALRYLKDCLTNRDLLIQMWMPV  
RRGDKLVLTTHDQPYLLEPSCVSLANYRKVLSGYEFAEEEEEGEESVGLAGRAYVGKLPEWTPDVRYFKRHEYPLI  
RYAEEYNVRGSLALPVFERGSGACLGVEIVTTTQRVNYRPELDFITQALESVDLRSFQNFIPPIVKTCEDELYQAAL

TEILEVVTSVCKTHRLPLALTWAPCSQQGKGGCRHSDQTYTRCVSTVDSACFVSDLETTGFHEACAEHHLFRGQ  
GIVGTAFTTKKPCFAVDVTAFSKTEYPLSHHARMFGLVAAVAIPLRSVYTGPAEFVLEFFLPKECRNNDEQKRML  
NSLSIVIQQSCRLHVVTDNELEEEITEKAKPGPSTLEGDHHCTKDQSSWIAHMMEAQEKKGVSLSLQYQTDE  
AEEEREGFRVTSYWDATQGGGLTNGEVITEFGEHQSSGLKSGDEGGDSYSFGSRRGGRKAGEKRRTKAEKTI  
SLSVLRQYFAGSLKDAAKSIGVCPTTLKRICRQHGITRWPSRKIKKVSHSLRKLQLVIDSVQGAEGSIQISSFYKSFP  
ELGSTNVNDVNDQFSSLKINYQNQHQAESGLFSGAPAKSPASSSSQNSIPTRPNHHHMIANVNAFSGGDFLITE  
DPVGVMMNRGSSEEPFGEMLMTNNNGCFKVKANFVDKKIRFILQPSWGFRLDLQLEIGRRFNLEEMRGVEIKYLLD  
DHELVLMTCDADLEECKEYSSSQNNTIVLSLSWASHQNPASYSYGKSSPS

>Datisca\_glomerata\_Datgl928S36251

MTSGSCFPALEWHYQLPVQDTPDFIPLVGSFPFDALYSSLDIEPVIKTSTTDDIFYGYGDAMGVWQNGMNN  
ANGLLQENPVLLCNGIVEEKDDQEKNNNNNSKSLSRKVISQYFYMPTQAAKQLNVGLTLLKKRCRELGIIRWP  
HRKLMSLQTLIKNVHDMSKDEGEENQLKLKDAINILEKEKKLIEVPDLQLFDNTKRLRQACFKANYKKRKLMMGI  
MMDSQSSTSNNASVEYTITYGIANGEDDDEEEDLKSLLSQYSFSSSIML

>Datisca\_glomerata\_Datgl191S23501

MEYSTNQFNPNVRKFEFPYNEFDWLPAREDPSHFSKAWELPPVDRFYDFNSLPITNRHYGYLDSLQFESVL  
DFPDFSDEKFLPEDEIESIFRDILMDEKPLNTLFTDSYNENNCGNLNNQFGTEVSRMMMMNIQTEYSINS  
SKKNNEELGNMRLSCGRKRSVLELDDIQKHFDVPITKAAKQLNVGLTLLKKRCRELNIMRWPHRKLKSLKSLIT  
NVKEMGMTNEIIMLEEKKLLEKLPDMELTERTKRLRQACFKANYKKRRCLAITS

>Discaria\_trinervis\_Distr562S25840

MSEEEEEASFPKSEDVDEGDGDREALMDFDLESPWPLDQIAFVSNPMSPLVFSSTDQPYSPWAFCDGD  
SEEKLARHVNSTIADCPRTSCDSNSVTERPAENEGKRMWTSPLLGLVPFENPDANCLIKEKMSQALRYLKDST  
DQHILAQVWAPVKNGGQYVLTTSQGPFVLDSHNGLHQYRIVSLMYMFSMDGDSEGLGLPGRVFRQKLPE  
WTPNVQYYTIREYPRGLHAQHYNVQGTALPVFEPGQACVGVLELIMTSPKINYAPEVDKVKCALEAVNLKSS  
DILDHTGTQICNEGRQNALTEILKILTVCETHKLLMAQTWVPCMRNLAAYGGGLKKSCSTFDGSCMGQVCM  
SITDVAFYIIDSTMWRFREACLEHHLQKGQGVAGRAFLTHNLFCADITQFCKIEYSLVHYARMFGLTSSFAICLRS  
THTGDDDYILEFFLPPSISDSRQQQIFLGSLLATIKKHQSLRVASGTVFEEVFVEIIQASSEGLDSRIECIQIFQSPE  
SPTVPTILPNVGDMMVQPDSTPHQLIEDFCAANDGSTAGQCGSNHVSFQENKDTKKISERKRGKTEKSISLEV  
LQQYFAGSLKDAAKSLGVCPTTMKRICRQHGISRWPSRKINKVNRSLSKLRVIESVRGAEGAFGLTPLSTSPLPV  
AVGSVSQPFTLNRTSSPSKTCDSFMKKKKSQTSFSPGRELAGMEEPLLGGVLRPEELIHESIRFSPEIGTGLKQS  
KSGSSSREASVGTPTSHGSCQGSANGSAKKDYLGSCQGSANGTTIHKDPVSSIHEQCVKVDGSPESALQPTD  
ELLKFPVLCSIPDALVTTESQEPFGGMLIEDAGSSKDLRNLCPAADAILDDQIPEYYWVNPQCSDLAPKQPMGTL  
TPTMSHLKPRQEMKNVTIKATYREDIIRFISLSSGIVELKEEVAKRLKLEVGTFDIKYMDDDHEWVLIACAADLQ  
ECMDICISSGSNVIRLLVHDIMPNLGSSCESTE

>Discaria\_trinervis\_Distr887S28955

MDDIVLSPATVLGAPSDTAMDLDPMDELFLGCGWLETTDGSGLNQSPPGSNAVFDPLFVWPPLTNSLSTN  
PSQRSNQDERPRTPHNDPLERGPLATQSPQNRIIDVEGCSGSEDQTIQVCEPGRRWIGPKASPGPASSVT  
ERLVRALAHIKDFIEDNNALVQIWPVHREGRRVLTNDLPCAIDPSCPNLARYRDVSVNYQFSVEEGSKELVMG  
LPGRVFSQKVPWTPDVRFRNEEYPRVSHAQRYDVCGLALPIFEQASKTCLGVVEVLTQKIKYCSELESVCK  
ALEAVDLRSSEILNTQNVKVSNNMYQAALPEIHEVLRSAETHRLPLAQTWVPCIQQAKEGSRHSDDNYTQCVS  
TVDHACHVADPHIRAFHEACSEHLLKGQGVAGEAFMTNQPCFSADVASFPTKYPLSHHARMFGLRAAVAI  
RLRSIHAGVADFLVLELFPVDCTDPEEQKKMLTSLSLIEQFCQSLRVITDRELEESDFSVSEVTVPSNSRLGKTAC  
LTEVQQSGTAVSLFPKVKPKEDSGEKLSDSRQLQKDSNDKTVEYAGDCSIIEGGSFSSLGVGKTEKRRTKAEKTI  
TLQVLQYFSGSLKDAAKSIGVCSTTLKRICRQHGIKRWPSRKIKKVGHSLQKLQLVIDSVHSGASGAFQIDSFYTN  
FPELASPNLSGGGPFSTSKPSDHRKPSNMHPEGDIFSSQATASKSSSSCSQSSSSQCCSSRAQQQPPMSNVAG

NEDLMVRENSGDGMLKRVSEAEHASTLDVKKPLQRSRSHKLLSDHHQKENIPSLPTNNSRGGSQVVGDFQ  
RVKVTYGDEKTRFRMHNNWGVKELVQEIARRFNIEDVDQFDIKYLDLDDSEWVLLTCDADLEECIEICRSSSESNT  
IKLSLQVSRHYLRSCLGGNPSRPS

>Discaria\_trinervis\_Distr929S29326

MEASLQLYVPKLENQLDFDWLYHEEPSENYFPELPPLPDTFIDFNFSPLIPYHYNYNHIHNVPCIEFYDFEDVISSG  
FFLDNVAYSSPCEDFMVDEKPQTTMKNSFTHLENLTHEERGLPSVSNDREEERSSSNGGDQRKKSAGLELNDI  
QKHFGVPITKAAKELNVGLTVLKKRCRELNIMRWPHRRIKSLKSLIDTVKEMGLTNEIMMLEKHKSLEVLDPDM  
ELTEKTKLRQTCTFKANYKKRRSLQLAYA

>Discaria\_trinervis\_Distr968S29608

MDSSTHFLHSLIFSNATANRELIRSLHVYRLDNGKETEIERLFVFSENGYPVEMAAPLFLKKIQVSEVYEGCVN  
GLWVCIFAFHAGHRPQTTCPISILSIFRNPKLSIPS LANDLQSIFQLSRIVDERQTNNENYHQSKRSLPVLDDLDL  
CLPYSVTMSESAEEEQIDQSSPGTVAMKKKRAASDHIALSDLAKEYFDLPHEASRLKIGLTVLKRKCREFGIPR  
WPHRRIKSIDSLRDLQEEKCQQQEDMAAAIAVAKRQKMLESEKESIERKPFLEIKSETKRFRQDVFKRRHRARA  
LMSQDLTISDENPYGLH

>Discaria\_trinervis\_Distr1227S00421

MENPFSSKEKGFENWESSRAQVENMASFDGGTRNSLAEDMLNMFSELMNFDNYAGWCNSSPAVDQMPAS  
FGLSPSPMSYAPIDALNSTERISGLLPVAGGGGDFNLERSPLNYGDKTVFQQVDNQFGFSSNSNDANESVTKQ  
SGGSFQNNIMDIMNSIIRPLALSLEKMLKALSLEKSSGGGILAQVWVPMKHGDQYFLSTFEQPYLLDHM  
LAGYREVSRLYIFSAERKEGSFPGLPGRVFISKIPEWTSADVGYYSKTEYLADHARNHQVRGSIAPVFDSPDVS  
CCAVLELVTTTEKPNFDESEMLVCRSLQAVNLRTSVPPRLLPQCLSRNQKDALAEIIDILRAVCHASLPLALTWIP  
CCYTEGASEENMTLRIRKGNKSSNEKSILCIEETACYVNDAMQDFVRSCAEHHEEGQGLAGKALQSNLPFFF  
PDVKTYDICEYPLVHHARKFGLNAAVAIRLRSTCTGDDDYILEFFLPVNMKGASEQQLLLNNLSGTMQRICRSLR  
TVSETELTGAGCSNIEFQTGSIQNFPMRSGNSQLTSDSDVNFMEGVTLNIPDQKNEGIEADIPLEQALGGPRK  
KMEKKRNTAEKNVSLSVLQQYFSGSLKDAKSIGVCPTTLKRICRQHGISRWPSRKINKVNRSLRKIQTVLDSVK  
GAEGGLKFDPTTGGFVATGSIIQDFDTQKNLLFPEDTQSTQNPELIQHAVSANTVPFIEGEDFVILEEDEYCMG  
GNIPIRNSCEMESKKNIPTLNSNGSSKPIIDTGSCQPASFVTRLQNRPEIASLVSYTVKEGKKPSEKNYNLKEN  
SDCHFASRSSSSMAAANEMDAAEDGDDGIVEHSQPTSSSMTDSSNGSGSMVNDCSSGSQSFDERKQPKGKR  
NCFDSGFKIRVKATYREDTIRKFEPESAGYFQLYEEVARRFKLQNGTFQLKYLDDEEWVMLVSESDLQECLEILD  
DVGTHTVKFQVRDMPYGLSSSGSSNCFLTGGG

>Discaria\_trinervis\_Distr1414S00757

MEYSGAMVPNSTYGNFNPSESDFMEELLFEGCWLESSSGFNFMQSTSNPRSLLDPSHYMPSFDSSALSQRR  
QIYNEDDDDNDEQQESSKRVWIGPRAYPNPSSSVKERLMMAVGYLKDCTDRDVLIIQWVPIRRGGRQMLTT  
CNQPYSLNPDCSLANYRAVSSGYHLLTEEDSGESVGLPGRTFLGKLPDWTDPVRRFRSYEYPRVSYAQQYDVR  
GSLALPIFERGSGSCLGVVEIVMTTQKVNYRPELEYVCQALEAVDLRSSQNFIIPNIKACDELYQAALSEIVEVLTS  
VCKTHRLPLALTWAPCVQQGKGGRHSDENYARCVSTVDSACLVIDLDIMGFHEACSEHHLFRGQGIVGTAFS  
TNKPCFATDITAFSKTEYPLSHHARMFGLHAAVAIPLRSVYTGSDFVLEFFLPKDCHDPPEEQKQMLNSLSIVIQQ  
ACRSLYVVVDKEPEEAMLPIRETIIPSDVRLGKEESQKLGSPSEETSQKESWIAHMMEAQQQKCLSVSLDYQ  
MEEPKEEFRVTTHWDSNQGLPNGQVFSDFGQLQSSGPKVSVGGGDSYSFGGRRSSGGRKAGEKRRTKS  
EKTISLQVLRQYFAGSLKDAKSIGGKKISTTISNIILFIKSIVCPTTLKRICRQHGITRWPSRKIKKVGHSLRKLQLVID  
SVQGAEGAIQIGSFYSSPELSSPKFPGSDPFSSMKSSDQSKQLNSQTESGLFSQGGTMMKSPSSSCSQTSGPSVC  
AAGVQQHITNINGMSSADALMAEDPVGMLKRACSDAELLACNLEETKIMPRSLSYKALSENRTLESPLPLPGSS  
GWNFRDGGALRVKANFGDEKIRFSLQSNCSFGDLQLEIARRFNLDNISNIDIKYLDLDDREWVLLTCNADLEECM  
EIKSSQSRTLRLSLQRAPYPNLGSSFGSSPS

>Discaria\_trinervis\_Distr2169S18482

MADQAGLSVPYHDPYDGPYNDDILNLMDDNIPFLADLAPLFDGPSFHPHSVRLFNDFGVQEAHPSQWDSR  
NNGPGGGVNSEAGPSGIGCEMGNPPGANLETPNACDDYACTKPLSVWPVPPLPFNCSCCQVLREIHINGDKI  
MKLEIHGRGLGMICHA VFQ NQIVDVSSGNNNRSEMFDFCKKSIEDVKQFLMQYCLQRKLEGVYMQQDPLAFF  
YEALCVGLEWDDIDITNSDDLITSPVNSGSARMQQPEEAGQPAVDIEAERNRSRLAEQRQRTGRLTFLDLREY  
LHLPIEEAARRMNVCPTVVKKICRRNGLTRWPHRRIKSIRKQISNLLPSLSDSDARIRINAQTEINRLQQEVTNIC  
AGVSIAML

>Discaria\_trinervis\_Distr2562S20066

MVAKDIEPNFPFPTTNHFTTDFDLSSILGGDGFPMDCQFELPLPDNNNNNILLDAVPLMECFPTDPLYTTLDFK  
PTGPNLFQDDLFGDHHGNSLGVYKDV FVG LESSQQQQQQQLLTCNKDGLNNKKVLREERKIIKRVRSSEEKS  
SSCSKALS RQIISQYFYMPITQAAKELNVGLTLLKKRCRELGI RRWPHRKLMSLQTLIKNVQELGKEEGESELKLR  
DALELLEREKRLMEELPDMQLEDNTKRLRQACFKANYKKRRLMGMMGNSQAPSLICNNSPAANSMSITYEN  
RNDDEDDSQEELISLLSDSFSTDVSRQRTSRKPEYFAPNPRKLLISLIKSTHKTHLLPIHAHIVRTSLIQDHSVSL  
QFLSRAALSPVRDVVSRLFFSQIWEPNVLQCNTMIRAYSMSDSPEEGVYMYREIRRRGLCPDPVSSSFALRSCI  
RVSSLEGGIQVHGRVLRDGHQLDSLLMTTMDLYSCCERFREARKLFEIPTKDAVAWNVLISCF LRNKRTRDA  
MSLFDIMQSEYACEPDAVTCLLMLQACANLNALEFGERVHEYIEEHGYSGALNLSNTLISMYSRCGCLDKAYG  
VFKGMQEKNVISWSAMISGFAINGYGREIDA FEEMRRVGVQPDAQTFTGVLSACSHCGLVDEGMMFFDCM  
SKDFRIEPIHHYGCVVDLLGRAGKLD RAYQLILSMNFRPDSTIWRLLGACKIHGNVNLGECVVGH LIELKAAE  
AGDYVLLLN IYSSVGNWEKVKVRKFMKDKAIQTTPGCSTIELKGVVHEFVSDDVSHQRKDEIYKMLDEINSQL  
KIAGYEVEISSELHNLGSEEKGYVLSYHSEKLAIAFGILATPPGTTIRVAKNLRICIDCHNFAKVLWSYNREVIIRD  
TRFHFFQYGKCSCNDYW

>Dryas\_drummondii\_Drydr2S08004

MASLSYGQHTPLCQMDYSTVSTQLIVPKIEYPQYDFDWIDYYQDPFHNTSTLLEQVPQQDNFFDHDQFSSQPL  
PYNQYNQLLPHMGYQDFEDLSSWDYTLDN TATFASSSHCDYMVVDEKPLNTLVNSFEQYYSNNMSTSDFDEV  
SRMIEWGLNNWGKHEEESGRSTRSSGNKKIKKTAAL ELDEIQYFDLPISHAAKELKVGLTVLKKRCRELNIMR  
WPHRRIKSLKTLIENVKGMGMTNEIMMLEEHKRLQLPDMELTERTKKLRQACFKANYKKKRSLTITAGRA

>Dryas\_drummondii\_Drydr394S11526

MPEPEDETRTPAIPPKSKNVAVVDEREAAVLMDFDLDDASWPLDQIH FVS NPTSPLTFSSTDQPCSPLWAFFD  
GDIDDKLAGHV TQALSDSPQFVACISDPVTEKPRENEYNRMLPSPFLGLEPVENPDVYCLFKERITQALRYLKEST  
DQHVL AQVWAPVKKGSRYVLTSEQPFVLDPHSNGLHQYRMASVMYMFSDGESD GALGLPGRVFQQKLPE  
WTPNVQYYSIKEYPRLDHAQHYNVQGT LALPVFEPSPGQSCVGVLELIMTSPKINYGPEVDKVCKALEAVSLKSTE  
ILEHTNKQIQICNEGRQKALTEILEITVVCETHKLPLAQ TWVPCMHRNVLAHGGGLKKSCTSF DGSCMEQVCM  
STTDVACYIVDAHMWGFREACVEHHLQKGQGV TGRAFLSRNACFCRDITQFCKTEYPLVHYARMFGLTSCFAIC  
LQSIHTGNDDYILEFFLPPSADSYVQQTLLGSL LAIKNHFQTLKVASGFVLEEEGIVEVVEVSTNEGLDSRLECIWI  
PHSTETPPELPNREETVHLDSSNPQLMVDFDAVNNGNNAVNECEKNSSLENKDIKRASERKRGKAEKSIS  
LEV LQKYFAGSLKDAAKSLQVCPTTMKRICRQHGISRWPSRKINKVNRSLSKLRVIESVQGAEGAFGLSPLTAS  
PLPVAAGPISQPSILNGSNKQSSPRSKPCELHGEKKDSPTATTPGSLGQAGIEDQFIDGGILSQEELLQEH SRFLD  
IGKGSNM SKTSGSREASDGTPTSNSSCQGS PANGGSMVNGPVVSSIHEQGIEVDGSPESA FRPPVELNLAV  
ACSI PDALLMTEAEPCRGMLIEDSGSSKDLRNLCP SAADAVVDEQVREARWTNHPCSDSAPKQSIGTLPH TM  
PHIVDRKEMKSVTIKATYKEDIIRFRLSMSSGIVELKEGVEKRLKLEVGTFDIKYMDDDLEWVLIACDADLQECM  
EICISSGSNMFRVSVHDIMP NLGSSYESTDE

>Dryas\_drummondii\_Drydr83S05805

MEDGLLSSATMLGAQPDFAMD LDFMDEIFLEG CWLETTDGP EFPYQISSGSDALLDHSIFWPALETNGNLRM  
NPSQNSNQEMQRSLFTDLQEEGPIN VQSPGQNMIDAKGCSGQLADPTIEGHELSGSWWIGPTENPAL SVM  
ERLMRALVYIGDVMRNKDVLVQI WVVPVDRGGRRVLTNDLPFSLDSGCPRLAKYRGISVNYQFSTGEDSEELVK

GLPGRVFSGKVPWETPDVRRFRSDEYPRVDHAQLYDVRGTLALPIFERGSRNCLGVLEVVTQTQKIKYQTELESV  
CKALEAVDLQSSKNLSTHNVKECDKPYQAALPEIQEVLRSACETHKLPLAQTWALCTQQGKDGRHSDDNYVH  
CVSTVDHACHVTDRHIQGFHEACSEHHLLKGQGIVGSAFITNQPCFSNDITSSVKTEYPLSHHARMFGLHAAVA  
IRLRSILTGSTDFVLEFFLPVECRDPEEQKKMLTSLSLIIQQTCSRSLRVVTDKELEEETDFPVSEAVAPSDPSPSSFAC  
LTEVQQSGNDVSIYPKEKQREILGVKSSKLKQRQQDSNQKVGTEFGGECSTFGEGSFSSVGVSKTREKRRTKAEK  
AITLQVLRKYFSGSLKDAAKSIGVCSTTLKRICRQHGIQRWPSRKIKKVGHSLSLQKLQLVIDSVQGGASGAFQIDSFYT  
NFQELASPNLSGTNPFTSKLSQPKPTNMPPEGGVFISQATASKSPSSSSCSQSSSSSHCCSSRTQQQPPTWNV  
AGNADPIVGSNFSQDGMKLRVSEAELHAFGQDGSSELLPRSQSGKNLREQKKVKSIPPAVKNNGRLIQEGDAQR  
IKVTYVDEKTRFRIQSDWGYEDLVQEIARRFSIEDMSKFDIKYLDDESEWVLLTCDADLEECIDVSQSSSQGHTIKL  
SLQLSRRHLKMLLGSSGHS

>Dryas\_drummondii\_Drydr109S15134

MEYNFSSKEKGS DRWVSSRAQVENLASFEVGTNRNSED MFNNISELMNFDTFAGWCSSPAAMDQISASLGV  
SSCP SATYAPLDALNFAEQNSGALPVT EGGGT FNVAGSPFCG NKIVFQPM DTPQCGVSIDSHDANDSAAKPN  
NRSFQQNNVMDMSNYMISRPPGWSLSEKMLKALS LFKDSSGGGIL AQLWVPMKHGDQYLLSTCEQPYLLDH  
ILTGYREISRMFTFSAEEKQGSILGLPGRVFVSKVPEWTSNVSYYNKAEYLRVEHAANHQVRGSIALPVFDLDPE  
MSCCAVLELVSTKEKPNFDTMEIVCDALQAVNLRTSVPLRLLPQCLSMNQRAALTEITDVLRAVCHAHILPLAL  
TWIPCYHHEGTGDEIRVRVKEGVTSSDEKILCIEETACYVNDRTMQGFVRACAEHHLEVGDGIAGKALQSNH  
PFFINDIKVYDIYEYPLVHHARKFGLNAAVAIRLRSTYTGDDDYILEFFLPVNMKGSP EQQLLLNNLSSTMQRICKS  
LRTVLDAELVGVEDSNAGFQRGAIPNKPPISRNRSQTTSTDGELKSM EKIPSNVFNRRNGGNEADNPPEQAPS  
GSKRQVEKKRTTAEKNVSLSVLQQYFSGSLKDAAKSIGVCPTTLKRICRQHGISRWPSRKINKVNRSLKKIQTVL D  
SVQGV EGG LKYDPTTGGFVATGSIIQEFDAPKNILPEKNMPLQNAEPVSQDPVSVPSMSCNNDENLVIKLEEN  
GCVGGSM LIPTSHES EVKKHNTPLIKCSMDSKPTSIDLMSCRPTNHDTMPPSCPENASRRCLKLENSDCHFVSQ  
SSSSLAATDEMDTGVDGDDGIVEYNQHTSSSMTDSSIGSGSSMHGCSSSSQSFEERKHPQVNTSSVENESKIIV  
KATYKEDTIRFKFQPSVGCLQLYEEVAKRLNLQNGTFQLKYLDDEE EWVMLVSDADLLECLEILDDIGTRSVKFLV  
RDIPFGVSSSGSSNCFAGGL

>Dryas\_drummondii\_Drydr295S20004

MLSRETISKYFYMPITQAAKELNVGLTLLKKRCRELGI RRWPHRKLTSLQTLIKNIQELGKEGVESEEKLRS AIELLE  
RERKVMEEV PDMQLEDNTKRLRQACFKANYKKRKVMTGMLECSSHSSNLMITNHASMAAASNSFDQTREE  
EDEEIKSLLSDSFSS TSMNML

>Dryas\_drummondii\_Drydr146S16094

MADPCSVLPYHDPYDLGQYNEIMNLLYDDSDPILENVPPPLEGLSSPNHDYHPIHHQIEALDGGDHHHPMPLF  
DGVQDFDHLSDPNPTMGDLGNLSIDNNVGGSDSQAGPSQIFGELS NFDPPRGDEFDRNPRFADVRPLTVW  
PEPPVPFNCSCCQVLR EIIHFNSNDIMKLEIHGRLGMICHAILEIRRNIFNVSSDDNQYQMFDFCKKSIEEVKQF  
LMQYCLERKLEGYSMQQDPLAIFYEALCVGMDWDDILNTDDFIPASSPNPGAEGEME QPANPEAAENEIERT  
RRFSLAEQRERTANMTLDDLREYFHLTIEEAAKRLVCPTVVKRICKRYGLSRWPSRKIKSIERQKTNL RPSLCSND  
AEIRARAQAEIQRLETEVASLVP

>Dryas\_drummondii\_Drydr45S12448

MDSSEPHCLRSLLVFKNTVNQELIRSLHVYEIEDGKENGVEREFVFSANGSYEEVTAEP LLRLMKFRASQVLEGH  
VNGSWVCILAFHANRSPNFTCIPDILSVSRNPKLQSIPTLANDLQ NIFKLSCITDDKEPSQRSQEETCEGDNDNH  
HQLRRSLPVLDLDLNLCPYPTMSESSEDHESGRNSPGTEKKKKRAASDHIANISLQDLAKHFDLPIVEASRNLN  
VGLTVLKRKREFGIPRWPHRKIKSLDGLIRDLEETEIQQKENEAAALAVAKRQKMLESEKESIEKTPFLEMKNE  
TKRFRQDVFKRRHRARALKSQDPSNSGD

>Dryas\_drummondii\_Drydr380S11191

MDYGGMLPNPSYGTLSDTTMEVDFMDELLFQGCWLESNPGLNLLQQHQHPAGPPVSRALTDHP SHYFLPY

ESNPTAAHLSITPHQHQQIYQEDTDGSSYPESHSSFVVEGNTEAGRRLWIGPRANPGPSSSVKERLMLAIGYLKE  
CTKGRDVLIIQIWVPIKRGGRQYLTTHDQPFSLDPNCKSLAGYRNVSKDYQFITDEDSAESVGLPGRAFLEKLPEW  
TPDVRFFRSYEPRIEYAQQYDVRGSLALPIFERGSGTCLGVVEIVMTTQKVNYRPELEYVCQALEAVDLRSSQN  
FCPPCVKTCDELYQAALAEIVEVLTSVCKTHRLPLAQTWAPCVQQGKGGCRHSDENYAHCVSTVDVACFVADL  
DILGFHDACSEHHLFRGQGIVGTAFTTNKPCFATDIKAFSKTEYPLSHHARMFGLHAAVAIPFRSVYTGPADFVLE  
FFLPKDCQDHEEQQMLNSLCIVIQQACRSLHVDVDKELEEEVMFPVRESVVASDMGLHKEETQKLISSTPEEP  
SAKESSWIAHMIEAQQKKGKGVSVSLDYQTEEPKEEFKVTTHWDNTQGSLHNGQVFSEFQQLHQSCGPNGNV  
EGGADSYSGGRRSTSGGRKAGEKRRTKTEKTISLPVLRQYFAGSLKDAAKSIGVCPTTLKRICRQHGITRWP SRKI  
KKVGHSKKLQQLVIDSVQGAEGAIHIGSFYSSFPELNSPKFPGSGQYSSLNMSDHSKQVNPQHENGFLSHGTTT  
KSPSSSCSQTSGPSVCVPGAHQHPVTINALSSGDAFMTEDPVGVLRACGDASLHASFQEETKLIHRSQSHKSF  
SDNLTYENLPPLAGSSSRNSRDGGLYRVKATFRDEKIRFSMLPNSSFRDLQLEIARRFNLDDVSRIEIKYLDDDDRE  
WVLLQCDADLEECMEIYSSSPGRTVRLCLQQA FYPNLASSYGNSSPS

>Glycine\_max\_Glyma.10G234100.1.p

MSEPEEENNQDYVPRSKPAEEGGGGCTTMDFDLDLETSWPLDHMAFGSNPMSPFLSTSSDQPYSPWLWAFS  
DGEDPKLPASAFSDCHKIFSCDSNSIAEKPVENDDNKKNLPLVPMPPVENLDGYCVIKERMTQALRYFKELTEL  
NVLAQVWAPVRNGNRYVLTTSQGPFVLDPHSNGLHQYRTVSLMYMFSVDGENDGSLGLPGRVFQQLPEW  
TPNVQYYSKEYPRRDHAQHYNVRGTLALPVFEPISQSCVGVLELIMTSPKINYAPEVDKICKALETVNLRSEILD  
HPYTQICNEGRQNALSEILEITVVCETLNLPLAQTWIPCKHRSVLAQGGGVKKSCSSFDGSCMGKVCMTSTDI  
AFYIIDAHLWGFREACVEHHLQQGQGVAGRAFLSHSMCFCSNITQFCKTDYPLVHYALMFGLTSCFTICLRSSHT  
GNDDYVLEFFLPPRITDFHEQKTLGSLAIMKQHFQSLKIASGVELEDGSIEIIEATIERVHTRHESIPITPSIKSPPR  
LDTSPNMGEEVPQDPSEQQILMYCNDMNDGRSLGKNADGIDHMPSIETKNIKKPLERKRGKTEKSISLEVLQR  
YFAGSLKDAAKSLGVCPTTMKRICRQHGISRWPSRKINKVNRSLSKLRVIESVQGAEGAFLNLSKSP LPIAVG  
SFPESTPNKFSQSASLSIKPSEPQVKENELNASKALEANRQAGMEDQLLGGRTQNLEKVINDKGGYTREVGRE  
PKRTRTRNGSSEDSTNPTSHGSDHSPNESSPVKDIFITSNNDQCAGIKRSESTLQPTINTPSRPTAYPMPDFV  
AVELQEPFGGMLIEDAGSSKDLRNLCPLVAEVILEDMIPEACGTNLPGLDLPKLSMGTPNKAVTPFAAMKEM  
KTVTIKATYREDIIRFRVSLTCGIVELKEEIAKRLKLEVGTFDIKYLDHDDHEWVLIACDADLQECMDVSRSSGSNIIR  
VLVHDITSNLGSSCESSGE

>Glycine\_max\_Glyma.17G100400.1.p

MESQSLMGWSSFYEIDEKPPFTCQFSYSGNSEVYPSLDWPYGFPIQDYLDVAVPLMDYYPSPDPLYETLTATTE  
PTQSVQDYDFYDIKKGLSGWNEVDVAFDSQKVFLFGNNEESSGGIEKQMMEDGKVNNQGREERINN SSCRTL  
SRKTISQYFYMPISQAATELNVGITLLKKRCREVGIRRWPHRKLMSLQTLINNVQELGKEEGGESEKLRSAIEILE  
REKKVLEEMPDETELEDTTKRLRQACFKANYKKRKLTVTGRRKEPRSSSSSLH

>Glycine\_max\_Glyma.09G137000.1.p

MSESKDENPDLPPKSKPQEEHGFAMDFDISLESLSWPSDHISLVSNPMSPFLSTISDQPCSPVWAFSDAEDERLI  
RIAASAGNTNTTTENLVENYDNKKTVPPLVAIPTSENPDAYCLIKERMTQALRHFKELTEQNVLAQVWAPMRN  
GNRYALTTSQGPFVLDPHSNGLHQYRTVSLMYMFSVDGENDEIMGLPGRVFQQKIPEWTPNVQFYSSKEYQR  
LNHAQHYNVRGTLALPVFELAGQSCVAVVELIMTSQKINYAPEVDKICKALEAVKLRSEILEHQYIQCINEDRQY  
ALAEILEITVVCETHSLPLAQTWVPCKHRSVLAHGGGHKKSCSSFDGCCMGQVCMSITEVAFYVIDAHTWGF  
HEACVEHHLQQGQGVAGRAFLSHNMCFGNIAQFCKTEYPLVHYALMFGLTSCFAVCLQSSHTGNDDYVLEFF  
LPPGITDFNEQKRLGSLATMKPHFQSLKIASGIELEENASIEIIEARNERNLRFESIPITQSSKSPPRHASP NVGE  
GLPLEPSEQKIMAYFDGINDGSLGDNAGGHIDQNTSLKIKTKKKPSEKRGKAEKSISLDVLQHYFTGSLKDAA  
KSLGVCPTTMKRICRQHGISRWPSRKIKKVNRSLSKLKCVIESVHGAERAFGLNLSLSTVSLPIAAGSFSEPSTSNKF  
NRQTSLTIRPSEPKINEKDFDASGASETKRQAAMEDQFLGLEARAQSPEKVINDRGVATQEIGTKGTNKFRTGS  
GSSESSGNPTPHGSGHSPNEISPPKDIFVTGHSEKCLVLRGSLGSTTLHSTSTPNCTTAYPMPHIVETTEPQELF

GGQLLERAGSSKDLRNLCPADAVLEDQVPEAYKMNPQCSDLPQMQHMDNLNNTLTPFAVRKEVKSVTIKAT  
YKEDIIRFKVSMDCGIVELKEEIAKRLKLEAGTFDIKYLDDDHEWVLIACDADLQECMDISRSSGSNVIRLVVHDIL  
PILGSSCESSGDWKGCI

>Glycine\_max\_Glyma.04G054800.1.p

MDNNNNNNINSSVFSYACRDPFVSPLLDNFNEPDPALVYLLPEPNLRNDEQQPLQGHVSSTDSTIHDQSHHY  
CNDNFTIGGGVFPNYEFVEGSSKNKRYPFTDIEDQSFMHDFEAGPSNLNQPASGNMGPRNWPPMPRPF  
FCTCCQVLRQTIHTNGTDFERLEIHGRIGLISHIIQNSITPGGRSCDNYQMIDFTNGSPAENVKGFLEDYIARKDK  
LGYIIAEESEFSEFYEAECTKLDWVGKRTNNEDDDLTPQNVEEEPEPEPEPPKERRRKRSRKDQSDRINSMTLDDL  
SGVFHITMKAANKVLDMSVTAIKSICRKCRLYKWPHRQLQPLARRLKVLRKRALESSQDPVVIQTTSMEVRRRIKQ  
HMTQLCGGVPTPTGIEIPEVEE

>Glycine\_max\_Glyma.04G234600.1.p

MGFVFDVSDHDIVPHTFNSSFSSAQVNHTHKIMEISPLEGFSELDWPYSSNHLCFNEFPDLENLDLDFSLPPLGEY  
LEELDQKPLNIVVSQGVHNCREKGFGEASSFTIENGSAASYVQNIIRQRPQPVSSSSKKKTCVLKFDEIRKHFG  
VPITEAAKRLNVGLTMLKRRCRELNVKRWPHRKLKSLQLLIDNVKEMGLEDEVARVEKHRLLEKLPGMELSEE  
AKKLRQACFKANYKKRRCMASLQA

>Glycine\_max\_Glyma.04G169000.1.p

MENQQLTFWKSNEYIDDYFAPTCQFSSYDYCSWGNANDGYHWPYEFPLQDSYDAIPYMKCYYPHDILYEST  
LPIEPTSLSIRDYDFSDVKNVLSALNETDGS DHKPAFSSCNDGESVDEMVEDLKGGKKEEGISSAKMLSRKTVS  
QYFYMPISQAARELNVGLTHLKKRCRELGIQRWPHRKLKSLQTLIKNIQEQRETGGHENDEKTRAAIEILEREQR  
KVEEMPDLELEDNTRRLRQACFKANYKKRKLGMGRLIEPDSSLSGLFNKY

>Glycine\_max\_Glyma.04G017400.1.p

MGDSGVTSSAATMMEAPPDGTTTTATSMDFDYMGEFFLDGCWLEASADVSDFLQSPFSNPLFDPPLSW  
PALETNHNKSQDAAFGTQQESHNNIVSVVAGGGYSQQFQSETHSVEGVSEGVRRWWFAPSPIPSPGPGPSIM  
EKLIRALMWIKDYNRNKMILIQIWWPIHKEGRPILAADLLFSLESKSLNLAKYREISVTFEFAEESDSKELARGL  
PGRVFRYKVPWTPDVRFFRSDEYPRVDHAQEYDVRGTAVAPIFEQGSKTCLGVIEVVMTTQQINYGPELESVC  
KALEAVDLRSSKQLSIQNVKQACNRTEAALPEIYEVLRSAEMHRLPLAQTWVPCVQQGKEGCRHSEDNYLLC  
ISPVEHACYVGDPSIRSFEACTEHLLKGEVAGGAFMTNQPCFSDDITSLSKKDYPLSHYARLFGHAAVAIRL  
RSIYNSTDDFVLEFFLPVDCNDSEEQRKMLTALSIIQVRCSRVRDKELEENLSVDEVIALADSGFARNAIFSE  
PQYKGMVASLDAEEKSSETMGRKFSDLRQQQESPIKGNLDCVKECSTSVEGNLSSLGTNKTGERRRAKAEKTI  
TLQVLRQYFAGSLKDAAKNIGVCTTTLKRICRQHGIKRWPSRKIKKVGHSLQKLQLVINSVQGASGAFQIGSFYS  
NFPDLASPNLSGTGFFSTLNQSDYPNSTSTQPDHGSLSPEGASKSPSSSCSQSSISHSCSSMSELQQHRTANGA  
GNKVSTTVSEDSAGVVLKRISSEAEKLSLSQDRAKLLPRSQSQETLGEHPKTQYQQPLLKTSKSKVDSHRVKVAY  
GDEKTRFRMPKSWGYEDLLQEIARRFNVSDMSKFDVKYLDLDDCEWVLLTCDADLEECIDVCQSSESGETIKLSLQ  
PSSHSMRSSLFR

>Glycine\_max\_Glyma.04G000600.1.p

MEYGGLVQNSAYGSFSEIFGPETDFIDELFVEGCWVETRVGSYLNCGGEANSSKPNTMASMETSQIIFQEESL  
SDPEISLMVGKRWWIGPRENPGPSSSVKERLVIAGVYLKEYAKNSNLLIQVWVPERRRSARAQPQDNYPYAALL  
NTTSAFQFQEDWVHDQWTPNIRFFRSHEYPRHLRRPGSLALPVFESGSAMCLGVVEILMPNNPDLHALQSVD  
FTSSTCHQNFIPPAAVTAKGFDELYQSALNEIVEVLTCVCKAHNPLALTWAPCIQQGKSGCGHSNDENYVSIVD  
PASFVADVVEVLGFLEACSECHLLGGQGVVGTAFSTTKPCFANDITAFSKAEYPLAHHANMFGLHAAVAIPLSDS  
ADVFLEFFLPKDCHDTQEQQMLNSLSMLVQQACRSLHVVMGKEEEEEEEELIALPPVGKEMESSSSSWIA  
HMMEAQQKKGKGVSVSLEYLQEPKQEFRVTNCNEQVSVGVESGGGEESYTAAGGRRGARKSAGDKRRTKA  
EKTISLPVLRQYFAGSLKDAAKSIGVCPTTLKRICRQHGITRWPSRKIKKVGHSLRKLQLVIDSVQGAEGAIQIGSF  
YTSFPELSSANGVSESSNINNKFFSEYNQGATTFTKSPSPCSQTTLISENQQLVLGASIQVQEEAKHFAHLEPL

PPAPLPQSSTSLWNTAGTFRVKATFGDEKIRFSLQPNWGFRLDQMEIARRFNLNEISNIQLKYLDDAREWVLLTC  
DADLDECKDINTSSQSRTIRLFLFQASPLNHANAFRGTS

>Glycine\_max\_Glyma.15G027900.1.p

MEYPFSPKESVIGDWQSSGAQLEGSASLDGRMSNSIPEDMPNSFSELMNFDTYAGLCNSPSITDQILANDLP  
ASLSYPLPDGFNLVQQYSGQYCMMSGVGRNNNDMESSPIYGEKVVCQQMDTLLGCLNDTNEANNLNSKLKMN  
SSSQHLNNFDTGNYMMSRSPGLSLDERMLRALSFFKESAGGGILAQVWVPIKHGDQFILSTSDQPYLLDQML  
AGYREVSRTFTFSTEGKSGCFLGLPGRVFTSKVPEWTSNVGYYSMSEYLRFEHAINHKVRGSIAPIFDLHSEFPC  
CAVLELVTTKEKPDFDRELEIVRHALQLVNLRTVKTLRCLPQSLSNKKATLTEIVDLRSVCHAHRLPLALTWIPC  
GYTECSRGEASRIKGGHSTSSEKSVLCLEESACYITDRAMAGFIRACMEHHLEEGKGIAGKALQSNHPFFYPDV  
KTYDISEYPLVHHARKYNLNAAVAIRLRSTYTNDDEYILEFFLPVNMGRSSEQQLLDNLSGTMQRICSSLRTVSE  
TELSGIESSPVGLGKKNAPSFPLSSRNSDIPLINGDCDSVQKMSLKATTNLKDNEIEPSNPQERNGSKRQVQKN  
RSTSEKNVSVLQQYFSGSLKDAACKIGVCPTTLKRICRQHGIWRPWRKINKVNRSLKKIQTVLDSVQGM  
LKFDPMSGAFVAGGSIIQIDAPKSTIKDPVPVTQDAFVPPAPCSEGENFSIKLEGKLLKTNVSSVDYSEDSKSM  
AINDGSCQMASLCTKVQDCPEQACLSVLAKEHDKRILNKGGLSVEKFKHNIVGQSSKSLIADEMIGVDGDD  
GVVERNHPHTSSSLTDSSNGSGSMMHSSSSGSRSFENQDQSKVKSTIIDCGSKLIVKATYREDTIRFKDPSEGC  
FLYEEVAARFKLQNGLFQLKYLDDEEWWMLVNDADLQECIEILDDIGTRSVRFLVRDMPVLSSSGSSNSYL  
GSS

>Glycine\_max\_Glyma.13G346300.1.p

MEYPFSPKDRVIGDWQSSGAQLEGSASLDGRMINSISEDMPNSFSELMNFDTYAGLCYSPSITDQILANELPSF  
APLSYPLPDGFNPVQLNSGQCCMSGVGRNNNDTENSLLYGEKVVCQQMDTLLGFLNDTNEANNLNSKLKIN  
SSQHLNNSDTGNYMMSRPPGLSLDERMLRALSFFKESAGGGILAQVWVPIKGDQFILSTSEQPYLLDQMLA  
GYREVSRTFTFSAEGKSGCSLGLPGRVFTSKVPEWTSNVGYYSMSEYLRFEHAINHKVCGSIAFPIFDLHSEL  
PCCAVLELVTTNEKPDFDRELEIVCRALQLVNLRTAKPLRCLPQCLSNKKATLTEIVDLRSVCHAHRLPLGLT  
WIPCCFTECSRGEASSIRIEGGHSTSRGKNILCLEESACYITDRAMGGFVRACMEHRLEEGKGIAGKALQSNHP  
FFYPDVKTYDISEYPLVHHARKYNLNAAVAIRLRSTYTNDDEYILEFFLPVNMKGSSEQQLLDNLSGTMQ  
RICSSLRTVSETELSGMESLAVGLGKKNAPSFPLSSRNSEIPLINGDCDSVQKATNLRDNEIESSPNQERN  
GSKRQVQKNRSTSEKNVSVLQQYFSGSLKDAACKNIGVCPTTLKRICRQHGIWRPWRKINKVNRSLKKIQT  
VLDSVQGVGGLKVLDSVQGVGVLKFDPSMGAFVAGGSIIQIDAHKSTIKDPVPVAQDAFVVRPAPCSEGEN  
FSIKLEGKLLKTNVSSVNYSEDSKSM AINDGSCQTASLCTKVQDCPEQACLSVLAKEHDKRILNKGGLSVEK  
FKRNIVGQSSKTLIGDEMIGVDGDDGVVERNHPHTSSSLIDSSNGSGSMMHSSSSGQSFKNQDQSKVKSTI  
VDSRSLKIVKATYREDTIRFKFDPCAGCFSLYEEVAARFKLQNGLFQLKYLDDEEWWMLVNNADLQECIEI  
LDDIGTRSVRFLVRDMPVLSGSSGSSNSYLGGSS

>Glycine\_max\_Glyma.02G311000.1.p

MEYGAFGSLSECEEDLIEELLEKGCVVETNGSSEAQYDIEQELAMPMGKTTWWIGPKGPVSGSSSVKERLVV  
AVGYLREYTKNNNAANVLIQIWVPIRRMTGLAIGLPDESVSVAFPFPTNMNMNMKSNNIRFFRSHEYPRI  
PYEYGSALPVFERGSGTCLGVLIQVMPAARWDTINYLPQLDNNNNNNAFQGMIPGGVVKVFEDEVYEASV  
NEMMEVVRVCVKTNVPLALTWAPCVQQLCVDCGHSRDENNYVSIVDRACFVGDGQPQLLGFQEAQSQH  
HLFRGQGIVGTAFTTAKPCFAMDITAFKAEYPLSHANIFDLHSAVAIPLRTSSYPHDFVLEFFLPKHCPD  
HNLFLNSLSILLQQACPTFHLSAPIHDDVFTSLPSESQSQASWIAHMIDAQSQHKDNGKGVCLSLDFLEEE  
PKKEFKVT TTHCNWDTTATSTYHSHDHVVFSDFGESQSQSQSQTHTFGVKRGRKPGEKRRTKAECTISL  
PVLRQYFAGSLK DAAKSIGVCPTTLKRICRQHGITRWPSRKIKKVGHSLLKLQLVIDSVQGAEGAIQISF  
YNSFPELSSRASQSSSPA AQSPPHVPQQPLRVKATFADEKIRFSLQPLWGFTELQLEISRRFNLSDVSNAN  
NVVLKYLDGGEWVVLACDGLDLECKDLHTTSQSRTIRLALFQASPLNNQPNSTYFANTTSTPSSS

>Glycine\_max\_Glyma.20G160200.1.p

MPESSEENQDYVPRSKPSEEAGGGCTMDFDLLETSWPLDHMAFGSNPMSPLFSTSSDQPYSPWLWAFSDGE  
DPKLPASAFSDCHKIFSCDSNSIAEKPVENDDNKKLLPPLVPISPVENLDGYCVIKERMTQALRYFKELTELNVLAQ  
VWAPVKNGNRYVLTTSQGPFVLDPHSNGLYQYRTVSLMYMFSVDGENDGSLGLPGRVFQQLPEWTPNVLY  
YSSKEYPRRDHAQHYNVRGTLALPVFEPISQSCVGVLELIMTSQKINYAPEVDKICKALETNLRSEILDHPHTQI  
CNEGRQNALSEILEILTVVCEHNLPLAQTWIPCKHRSVLAQGGGVKKSCSSFDRGCMGKVC MSTTDIAFYIDA  
HLWGFREACVEHHLQQGQGVAGRAFLSHGMCFC SNITQFYKTDYPLVHYALMFGLTSCFAICLRSSHTGNDY  
VLEFFLP RPRITHIHEQKTLGSLAIMKQHFQSLHIASGV EPEDGSIEIIEATIERVHTRLESIPASSIKSPRPDTSPN  
MGEEVPQDPSEQQILMYCNDINNGGSLGENAARNIDHMPSLETKNINKPLERKRGKTEKSISLEVLRQYFAGSL  
KDAAKSLGVCPTTMKRICRQHGISRWPSRKINKVNRSLSKLKRVIESVQGAEGAFLNSLSKSP LPIAVGSFPEPS  
TPNKFSLPASLSINPSEPQIKENELNASKALETNSQAVMEEDRLLGGRTPHLEKVINDKGRHTREVKGEPKRTRT  
GSGSSEDSTNPTSHGSCHDSPPNESSPVKNIFITSNNDQCAGLKRSESTLQLTTNTPNRPAAYPMPDFVAAEL  
QEPFGGMLIEDAGSSKDLRNLCP SVAETILED MVPEACGTNIPGPDLSPKQSMGTPNKAVTPFVAMKEMKTVT  
IKATYREDIIRFRVSLTCGIVELKEEVAKRLKLEVGTFEIKYLD DDHEWVLIACDADLQECMDVSRSSGSKIIRVLVH  
DITSNLGSSCESSGE

>Glycine\_max\_Glyma.20G016400.1.p

MDNNNNNNYSGFVPNNDDTDDDCTFLQTLLELDPQH FYLPTEEFVSLSLQQQQQNDPFGVEKGNNVPFLQGN  
NND FPIGEGVVPDVVDVEEEGPPRRTGKEPIEGQGDRFFI HGHDIFFGEGGVGN NVEPPQQNQ TQPPNN  
QDVRSLCSWPPPEPFSCSCEVLRQINYTNGVRFDKLEIHGAVGVINHAICLVEDKTSNRPPRDTYQIIDFCNK  
NTEEIRNFLNVYCKERTEAGFIPIEDPSMSAFYDALCTGMDWTEVSNDVDDDLGPPNGTEQESESEPEAENGR  
RASTSRPRRRDMAVQRQRVPRMTLSDL SGVFHLTISAAAVKLDVGDSTVKSICRRGKLKRW PQRKVQSLAKKV  
RVLERALNSPDGPVKRRTLDEIRRLQ QEIIENCGGITPTGIPMLQFDEE

>Glycine\_max\_Glyma.20G016500.1.p

MFPIDNPLL RFLFPRPKQQGNNVPFLQGN NNNDFPIGEGVVPDVVDVEEEGPPRRTGKEPIEGQGDRFFI H  
HDIFFFGEGGVGN NVEPPQQNQ TQPPNNQDVRSLCSWPPPEPFSCSCEVLRQINYTNGVRFDKLEIHGAV  
GVINHAICLVEDKTSNRPPRDTYQIIDFCNK NTEEIRNFLNVYCKERTEAGFIPIEDPSMSAFYDALCTGMDWTE  
RQRVPRMTLSDL SGVFHLTISAAAVKLDVGDSTVKSICRRGKLKRW PQRKVQSLAKKV RVLERALNSPDGPVKR  
RTLDEIRRLQ QEIIENCGGITPTGIPMLQFDEE

>Glycine\_max\_Glyma.05G026500.1.p

MGWSSFYEIDEEPFPFTCQFSYSGNSEVYPSLDWPYDFPIQDYYIDAVPLMDYYP SDPLYETLTTEPTQSVQDYD  
FYDIKKGLPFWKEVDAVFDSQKVFLFGNNEESGTKKEMMEDGKVNDNRGIEERISGSSSSCRMLSRTKISQYFY  
MPITQAARELNVGITLLKKRCREVGIRRWPHRKLMSLQTLINNVQELGKEEGRESEEKL RSAIEILER EKKVLEEM  
PDTELEDTTKRLRQACFKANYKKRKLTVTGRGREPHSSSFSGFVAR SIVNATGEYSNESEEEERDIKYL LSQFLE

>Glycine\_max\_Glyma.11G125500.1.p

MMRLLGCWLTRTKPLVQSLIQRNSNIGQISTSI FLSNLIMEDHVSPEGKEVSCCTPPGAQLEEPTSVDGGMKKS  
ASEDMFSNFSELMNFDTYAGWSNPSM TDQSLANVFSSFLAPYPVPDVLNLVEHGN GPFMTEDSEIHND  
MESAPSCGERIIFQQMDFQLGFLDEANDSN SLDSKQKPNGTSQEVNTTDMCNYIISSSPGRSLDDRMLRALS F  
FMESADGGMLAQVWVPIKHGDEFILSTSEQPYLLDPKLAGYREVSRAFTFSAEGKTQSCGPLPARVFISHVPEW  
TSNVGYYNKTEYLRLEHARNHEIRGSIALPISDVHSQVPCAVLELVTTKEKPNFDRELEIVSQALQLVNLRTTMPP  
RLHPQCLSSNKRAALTEIIDVLRAVCHAHRLPLALTWIPCCYSEGIRNETDRIRIKEGHTSPNEKCVLCIEESACYVN  
DGAVEGFVHACVEHHLEEGQGIAGKALQSNHPFFYTDVKTYDIGEYPLVHHARKYNLNAAVAIRLSTYTND D  
DYILEFFLPVNMTGSSEQELLNLSSTMRRICKSLRTVS DAELTGIEGSQGGFPKEKVS GFFPMSRRNSQIAFISD  
DHDSVLKMSLKASNMRNNGIEAVHSQTMNGSRKQVEKKRSTVENNVSLSVLQQYFSGSLKDAAKSIGVCPTTL  
KRICRQHGISRWPSRKINKVNRS LKKIQTVLDSVQGV EGGKFDPYTG GFIAGGSIMQETEAHKYLVFPEKSSVK  
DPKPATQKKVSVAPAPASTIENSTIKLNDDEGVCLVG NKLHVSR SIPNSNSGEGELKKDNVSSDDSKSMTMNDG

SCHKACHWKTKDCPEQTCMSLVLTDEVEGVDRVEGADEHNHPTSSSTTNSSNGSGSMHGHSSSCSHEN  
QKYSKVKSNVCVDSGSKMIVKASYRGDTIRFKFDPSSGCFQLYKEVATRFKLQNGSFQLKYLDDEEEWVMLVNDSD  
DLQECTEILDDIGTRCVKFLVRDVPCLSSHGSNSCFLSDSS

>Glycine\_max\_Glyma.11G085500.1.p

MDSSHTNTTLLTNLLVFNNLTQPELMRSVHVYRRGGGEKREVEREFVFSSESGSYVEMQATPIPLVKSRSVSEVC  
EGHRNGVWLCVFAFHADHTPQFCRIPRLLLVTRNPKLKMIPNLLDDLHMIYKLNKREEDRDIAQDSTGEERQG  
HSNNFQPSRKVFPVLDQDLNFLPYEDYESPDNETDVESPGFLVKKKRAPSDLVAKISLSDLVKYFGMPIVEAS  
RNLNVGLTVLKRKREFGIPRWPHRRIKSLDSLIHDLQEEAKNQELEDREAAMAVAKRQRMLESEKENIEKKPF  
MDIKIETKRFRQDVFKRRHRARAVEKHNSVSS

>Glycine\_max\_Glyma.14G001600.1.p

MEYGGFGLSECEEEELIEELLVQGCWVETSGRSEEMPMGKTWWIGPKANHASVKERLEAAMGYLREYTNNNI  
QIWVPLRRSAGQELGTDESDTIAFERNRNVKRLFRSQEGCVGPVLERGSGTCLGVLEIVMEDEVVSEMMEV  
VRCVCKAQKVPLALAWAPCVQKQAKTSSGRSLATAKPCFATDITAFSNAEYPLSHHASIFDLHAAVAIPLTTFSS  
SFHFVLEFFPLDCPDHNLHFLNSLSLLHQACRSTFHLSLIHDHLDHDFELPTESPSQASWIAHMMEAQSQHIKQ  
VCLSEEEPKKEEFKVTTHYCNWDSTATSTYQAHQVVFGEESHTHTFGGKRGRKPGEKRRTKAECTISLPVLRQ  
YFAGSLKDAAKSIGVCPTTLKRICRQHGITRWPSRKIKKVGHSLLKLQLVIDSVQGAEGAIQIGSFYNSFPELSSQS  
SKSNNNNNSSSPTAAAAAAQSPQQLRVKATFADEKIRFSLQPHWGFTELQLEIARRFNLNDVSNGLVLKYLD  
DDGEWVVLACDGDLEECKDLHTTSQSRTIRLALFQASPLNNLPNTYTFAAATPSSSLAVSL

>Glycine\_max\_Glyma.01G159200.1.p

MESTLLTNLLVFNNLTQPELMRSVHVYRRGDGEKREVEREFVFSSESGSYGEMQATPIPLVKSRSVSEVCEGHRN  
GVWLCVFAFHADHTPQFCRIPPVLLVTRNPKLKMIPNLLDLHVIYKLDREEDSDIAQDYTGEEERQNSNNC  
QPSWKVFPVLDQDLNCLPYEDESESLDNETDVESPGLLAKKKRAPSDLVAKISLSDLVKYFGMPIVEASRNLN  
VGLTVLKRKREFGIPRWPHRRIKSLDSLIHDLQEEVKSQELEDREAALAVAKRQRMLESEKENIEKKPFMDIQSE  
TKRFRQDVFKRRHRARAVGKHNSVSS

>Glycine\_max\_Glyma.12G050100.1.p

MEDHVSPEGKEVSCCAPPGAQLEESTVDGGKKNSSSEDMFSNFSELMNFDYAGWSNSPSMTDLSVANVFS  
LFSSAPYPPPDGLNLVEQSNGSFFMTEDSEFHNGMESSPSCVERVIFQQMDIHLGFLDEANDSNNLDSKEKLN  
GKSQQVNTSDMCNIIIRSPGRSLDDRMRLRALSFFMESADEGMLAQVWVPTKHGDEFILSTSQQPYLLDPKL  
AGYREVSRAFTFSAEGKTRTCPGLPARVFISHVPEWTSNVGYYNKTEYLRLEHAKNHEIRGSIALPISDVHSQVPC  
AVLELVTTKEKANFDRELEIFSHALQLVNLRTSMPPRLLPQCLSSNKRVALTEIIDVLRAMCHAHRLPLALTWIPCC  
YSEGIRDETERIRIKEGHTSSNEKCVLCIEESACYVNDGGVGGFVHACIEHHLEEGQGIAGKALQSNHPFFYTDVK  
TYDIGEYPLVHHARKYNLNAVAIRLRSTYTNDDYILEFFLPVNMTGSSEQQLLDNLSGTMRRICKSLRTVSD  
AELTGIDGSQGGFPEKEVSGFFPMSRRNSEIAFINGDHDSVQKMSMKTSMNRNNGTEAVHSQAMNGSRKQ  
VEKKRSTVEKNVSLVLQQYFSGSLKDAAKSIGVCPTTLKRICRQHGISRWPSRKINKVNRSLLKIQTVLDSVQGV  
EGGLKFDPTYTGGFIAGGSIMQEIDAHKYLVPKSSVKDPKPATQKTVSVAPAPGSTRENSTIKLNDDSVCLVRN  
KFVHSRNVLSNNSKSELKKNVSSDDCCDDSKSMAMNDGSCQKSLWTKTQDCPEQTCISLVLTDEVEGV  
DRVEGADEHNHPTSSSTTHSSNGSGSMHGHSSSCSQSFEKQKHSKVKSNVCVDSGSKMIVKASYRGDTIRFKF  
DPSSGCFQLYEEVATRFKLQNGSFQLKYLDDEEEWVMLVNDSDLQECTEILGDIGTRFVKFLVRDVPVFRSRGS  
NSCFLSDSS

>Glycine\_max\_Glyma.06G194300.1.p

MENQQLTFWKSNDYIDDDYYPFAPTSQFSSYDYCGWGSAADGYHWPHEFPLQDSYLDIAIPFMKFYYPHDILYET  
TLPIEPTSLSIQDYDFSDWNEIDGSDHKPVFSSCNDGESVSEMKEDLNAKKCREEKISSAKMLSRTTVSQYFYM  
PISKAARELNVLTHLKKRCRELGIQRWPHRKLMSLQTLIKNIQEQGEAEGHENDEKLRAAIEMLKREKRKVEE  
MPDLELEDNTRRLRQACFKANYKKRKLVGMRFIEPESSLSGLSNKY

>Glycine\_max\_Glyma.06G130000.1.p

MGFVVFVSDRDFPNLDNVPHTFTSSFSFAQLNHTHKIMEVSPLEGFSELDWWTPQLPYSSNHLCFNEFPDLENL  
DLDFSLPSLGEHLEEVDDQKPSNIVVPEGLRCNHEKVFGDALLATEHVSATCVKKEQVLNNIDQSPLPVLLASNSTT  
RKKPCALEFEEASFAIQNQNGSATASYLKKEEVQNIHQRLPVSSSSKKRTCVLEFDEIKKHFGVPITEAAKRLNV  
GLTMLKRRCRELSITRWPHRKLKSLQLLIDNVKEMGLEDEVPRLERQKRILLEKLPGLELSEEAKKLRQACFKANY  
KKRRCMALQS

>Glycine\_max\_Glyma.06G198300.1.p

MDNNNNNSGFVPNNDTDDCTFLQTLLEMDPQHLYLPTEEFDSLQQQQQKNDPFGVEKGKNKVSFLQGNN  
NNDFFPIGEGVVPDVVDVEEEGPPRGAGKELIPEGQGDRFFIHGDDIFFGEGGVGNNVDPPQENQTQPPNN  
QDVRSLCPWPPPEPFSCSCCEVLRQINYTNGVRFDKLEIHGTVGVINHAICHVEDKTSNRPPRDTYQIIDFCNK  
NTEEIRNFLNVYCKERIEAGFIPIEDPSMSAFYDALCTGMDWTEVSNDVDDDLGPPNGTEQESESEPEAGNGR  
RASTSRPRRRDMAVQRQVRPRMTLSDLGVFHLTISAAAVKLDVSNSTVKSICRRGKLKRWPQRKVQSLAKKV  
RVLVRALNSPDGPVKRRTQDEIRRLQKEIENC GGITPTGIPMLQFDEE

>Glycine\_max\_Glyma.06G017800.1.p

MMGDGGVISSAATMMEAPPPDGTTTTSMDFDYMGEFLDGCWMEASADGSDFLQSPFSNTLFDPSFSW  
PALETNHNESQVAAFSSQQESHNNMVSVVAGGDYSQQFQSETHSVEGASEGIRRWVFAPHTHTPSPGP  
GPSIMEKLIRALMWIKDYNRNKDMIQIWWVPVHKEGRPIAADDLLFSLESKSLNLAKEYREISVTYKFSAEESDK  
ELAWGLPGRVFRDKVPEWTPDVRFFKIDEYPRVDHAQEYDVRGTLAVPIFEQGSKTCLGVIEVMTTQQINYG  
PELESVCKALEAVDLRSSKQLSIQNVKQACNRSYEAALPEIHEVLRSAACEMHKLPLAQTWVPCVQQGKEGCRHS  
EDNYLLCISPVEHACYVGDPISRSFHEACTEHLLKGEVAGGAFMTNQPCFSDDITSLSKKDYPMSHHARLFG  
LRAAVAIRLSIYNSTDDFVLEFFLPVDCNDIEQRKMLTSLNIIQVCRSLRVIREKELEEANLSVNEVIALADSG  
FTRDEICSEPQQKGMVASLDTEEKSETMGRKFSEPRQQQESPILKGNLDCVRECSTSVENLSSPGTSKTGERR  
RVKAEKTITLQVLRQYFAGSLKDAAKNIGVCTTTLKRICRQHGIKRWPSRKIKKVGHSLQKLQLVIDSVQGASGAF  
QINSFYSNFPDLASPNLSGTGFFSTLNQSDNPNTSTQPEHGSLSPEGASKSPSSSSSSQSSISHSCSSMSELQQQ  
HTTNIASDKDPATVGEYSADVVLKIRNEAKLSLSQDRAKLLPRSLSQETLGEHPKTQYQLPLKTSKSKVD SHR  
VKVTYGDEKTRFRMLKNWVYEDLLQEIGRKFNVSMDMSKFDVKYLD DDCEWILLTCDADLEECIDVCQSSES GTI  
KLSLQPSHSHSVRSLEFR

>Glycine\_max\_Glyma.06G000400.1.p

MEYGGVLQVQAYGSYGSFSDILGPETDFIDELFVEGCWLETRVGSYLNCGTEANSSKSNTMRSMESTQIIFQQEES  
LPDPEISLMVGKRWVWIGPRENPGPSSSVKERLVIAGVYLKEYAKNSNLPIQVWVPERRSARAQPQDNIYPYAAA  
LLNGDAAAFQIQEDWVHVNDQYWTPNVRFFRSHEYPRHLRTPGSLALPVFERGTAMCLGVVEILMPNNPPD  
LQCTVDFTSSTSSHHHNFIPPAVTVKGFDELYQSALNGIVQVLTVCVKAHNPLALTWAPCIQQAGKSGCGHSN  
DEMNYVSTVYAAAFVADVLMGFLEACSECHLLGGQGVVGTAFTTTKPCFANDITSFSAEYPLAHHANMFGL  
HAALGIPLRSASADFVLEFFLPKDCHDTQDQKQLLNSLFMLVQQACRSLHLMEEEEELIALPSVVGKEMESS  
WIAHMMEAQQKKGVSVSLEYLQEPKQEFKVTTNCSNTNEQVSVGVESTAAFCGRRVGRKSAGDKRRTKA EK  
TISLPVLRQYFAGSLKDAAKSIGVCPTTLKRICRQHGITRWPSRKIKKV KELLHSNPQQLRLAVRPLL

>Glycine\_max\_Glyma.06G054900.1.p

MTLNDLSGVFHITMKAADVLEMSVTVIKAIKRKYRLYKWPQRQLQPLARRLKV LKRALESSQDPVIIQT TNME  
VRRIKQEMTQLCGGVTPGTGIEIPEVEENSV

>Glycine\_max\_Glyma.06G129900.1.p

MDFVVFVSDNDFPNLDIIPHTLNNSCFCSPHLNDTHKIMEISPLKGYFSHLDWTPQSPYPSNELPDLESWNLD FIL  
PPLDEDLEELDQKQLKSVVPQGFHCNQEKGFGDALLATENVSATCVKKEKVQIIDQSPLASSSSTKKRPCALEFEE  
ISKYFGVPINEAAQMNVGVTMLKKRCRELNIMRWPRRKIKSLQMVIDSVKEMGLEDEVARLEE HKKLLEKLP  
GLELSEEAKKLRHACFKANYKKKRCMALQA

>Glycine\_max\_Glyma.16G182400.1.p

MSESKEENPDLLKSKAQEEHGFVMDFGIGLESLWPLDHISLVSNPMPPFLFSTISEQPFSPVWAFSDAEDERQI  
RIAASGNTNTTTENPIENDDNKKTVPPLVAMTASENPDGCLIKERMTQALRHFKELTEQNVLAQVWAPVRNG  
NRYALTTSQQPFVLDPHSNGLHQYRTASLMYMFSDGENDEILGLPGRVFQHKIPEWTPNVQFYSSKEYQRLN  
HAQHYNVRGTLALPVFELAGQSCVAVVELIMTSQKINYAPEVDKICKALEAVKLSSEILEHPYNQICNEYRQYAL  
AEILEILTAVCETHSLPLAQTWVPCKHRSVLAHGGGLKKICSSFNGCCMGQVCMSITEVAFYVIDAHKWGFHEA  
CAEHLHQGGQGVAGRAFLSHNMCFCGNNTQFCKTEYPLVHYALMFHLNSCFVCLQSSHTGNDYVLEFFLP  
PGITDFNEQKRLGSLATMKPHFQSLKIASGVELEGNASIEIIDARNERVHLRFESIPITQSSKSPRHTSPNMGE  
GLPLEPSEPKIMAYFDGINDGGS LGDNAGGHIDQNTSLEIKTKKKPSDRKRGKAEISISLNLQHYFTGSLKDAAK  
SLGVCPTTMKRICRQHGISRWPSRKIKKVNHSLSKLKCVIESVHGAEGAFGLNSLSTGSLPIAAGSFSDPFTSNKF  
HRQTTLTIRPSEPKINENDFDAFGASETKRQVAMEDQFLGLEARTSPEKVINDKGVSIQEIGTKGTNKFRTGSG  
SSGSGNPTHASCHGSPNEISPPKDTFVTGNSEQCLVLRGSLGSTTLHSTSTPNRATAYPMLHIVETTEPEPFG  
GQLLEVAGSSKDLRNLCPADAVLEDQVPEAYKMNPQCSDLPQM QHMDTLNKTMTPFVAVRKEVNSVTIKATY  
KEDIIRFKVSMDCGIVELKEEIAKRLKLEVGTFFHNKYLDDDEHWVLIACDADLQECMDISRSSGGNIIRLVVHDIL  
PILGSSCESSRDWKGCI

>Lotus\_japonicus\_Lj0g3v0169309.1

MIMGVHPFTSWSSNSDMSDENLYPLTCQFSHSGNGSASYPALDWSDEFPIYDSHFDAAPYNVECYPVDPLYET  
LSIEPTPLTVQDYDFYEVKEGFSVWNEIDAGFESEKALLYCTNEESGKELMGNVKAKRGREVRSSSTRMLSRRTL  
SLYFYMPITEAARELNVGLTLLKKRCRELGI RRWPHRKLMSLQTLIKNVQELGKEGNEGEEKLRNAIEILEKEKKLV  
EEMPDKDLESNTKRLRQACFKANYKKRRLMEMEKMDPKYSSFYSGPVSVSITSSYATSECCYDDEKEHDIKGD  
LSKLPF

>Lotus\_japonicus\_Lj2g3v0381780.2

MPSEEEENPDPLKSKPMEEHGFPMDFDNDLESSWPFHDVSCLSNPMSPFLLSNISEQPFSPVWAFSDVEDDK  
HVSITASDTVTENPVENDDSKKHMTPLVPMPPLENRDGFCLIKERMTQALRHFKELTEQNVLAQVWVPVRNG  
NKYKLTTSGQPFLDPHSNGLHQYRTVSLMYMFSDGENDEILGLPGRVFQQLPEWTPNVQYSSKEYSRLN  
HAQHYNVRGTLALPVFEPGQSCVAVMELIMTAQKVNYAPEVDKVCKALEAVNLRSEILEHPYSQNCNEGRK  
NALAEILEILTVCEHNPLAQTWVPCRYRSVLAHGGGLKKSCSSFDGYCMGQVCMSITEVAYYIIDSHTWGFH  
EACVEHLHQGGQGVAGRAFLSQNMFCGNITQFCKTDYPLVHYALMFGLTSSFAICLQSSHTGNDYVLEFFLP  
PRITEFNEQKALLGSILATMKQHFQSLKIASGVELEEDGSVEIVETINERVHMRLESVP IIQSDKSPPRHDGSASP  
NRHGVPLDPLEQQTMLDGINDDGSLGDSGGGSM EKISSLEIKNKTQSRKRGKAEKSISLEVLQRYFSGSLKDAAK  
SLGVCPTTMKRICRLNGISRWPSRKIKKVNSSLKLCVMESVHGAEGAFGLNSPSSSLPIASAEPCSTSKLDHQ  
APLRIRPSES RMNWK

>Lotus\_japonicus\_Lj2g3v1623180.1

MDSSFLTNLLLFNNIIQPELMRSVHVYRQCGDDGEEETEVEREFLSKYSYYVEMQASPILQLQKSCVSGIREGY  
RNGVWDCIFAFHAGHSPQFSRIPLLLVTNRNPKLHCIPNLLNDLHIIYKLDVKEEDIDVTQEESLGNNNDCLPSEI  
ALPKRDLNLCLPYEEDSELQDNEIEVESLTGLVGKKKRAPSNIHIANIAYSDLVKYFDMPIVEASRRLNVGLTVLK  
KKCREFGIPRWPHRRIKSLDSLIHDLQEMAKHQELEDKAAAMAVMKRQKMLESEKENIEKQPFIEIQSETKKFR  
QDIFKRRYRARAIEQNSTVSSS

>Lotus\_japonicus\_Lj3g3v0339060.1

MEYPFSPKGGELGYWQSPSAQFGGSISSDNGISNSISDDMPNSFSELLNFDSYAGWFTGPSVTDQIFANELPSF  
ASVSYPLSDGFNLAEQNSGQFFTTGVCGNSSNLESSSTHGERVVCQQMDTLLGFLDETNDANTLNSKQKINDT  
LQQFSTFEEGNYTISRPPGPSLDERMLRALSFFKESAGGGILAQVWVPLEHGGQVILSTSEQPYLLDQMLAGYR  
EVSRTFKFPAEGKPGGFSGLPGRVVFVSKVPEWTSN VGYYSKNEYLRVEHARNYKVRGTIAFPIFDTHSELPCCAV  
LELVTTKEMSDFDRELEVCHALQLVNLRTTmplRIFPECYSNNKRAALAEIVDLKSVCHAHRLPLALTWIPCCY

TEGPKGEAMRIQIKEGHSSSGEKVLLCIEESACYVTDRLMEGFVRACIEHPLEEGKGIAGKALQSNHPFFYPDVK  
EYDISEYPLVHHARKCNLSAAVAIRLRSTHTNDDYILEFFLPVNMGRSSEQQLLDNLSGTMQRICRSLRTVSD  
VESSRIESTHMGFENKNLPSFSPLSRENSQIPLINANQDSVQSKLKASRLRNKGSKPPYNQVSNGSRRQVEKNR  
GTAENVSLSVLQQHFSGSLKDAAKSIGVCPTTLKRICRHHGISRWPSRKINKVNSSLKKIQTVLDSVQGVESLK  
FDPSVGAFVAGGSTIQGIDTHKSLLFPEKSTIRDPRPITQDAVSVPAVPCGESEKSAIKLEGKLLKKTNASLVDCCED  
SKSMAMDDRSSHSSSLWTKAQGSSEQASLGSDLAKRDKWVLNNDGLRVENLKCNTVGQSSGSFTDDEMID  
VDNDEVVELNHPTCSSLTGSSNGSSPMIHGSSSSSQSFENQSKGKSTTVDRGSKIIVKATYRKDIIRFKFDPSAGC  
FKLYEEVAARFKLQNGTFQLKYLDDEEWVMLVSDSDLQECVDILDIGTRSVRFLVRDLPCVSEAVSTEAHSE  
L

>Lotus\_japonicus\_Lj4g3v1635310.1

MIMGVHPFTSWSSNSDMSDENLYPLTCQFHSNGSASYPALDWSDEFPIYDSHFDAAPYNVECPVDPLYET  
LSIEPTPLTVQDYDFYEVKEGFSVWNEIDAGFESEKALLYCTNEESGKELMGNVKAARGREVRSSSTRMLSRITL  
SLYFYMPITEAARELNVGLTLLKKRCRELGIIRWPHRKLMSLQTLIKNVQELGKEGNEGEEKLRNAIEILEKEKKLV  
EEMPDKDLESNTKRLRQACFKANYKKRRLMEMEKMDPKYSSFYSGPVSVSITSSYATSECCYDDEKEHDIKGD  
LSKLPF

>Lotus\_japonicus\_Lj5g3v1999250.2

MSEDEEKPDPQKARPTTEPGFAMDFDLDESSWPMDHMSFVSNPMSPFLFSTMSDQPCSPWAFSDGED  
DRHTSLAAPAFSDCHKIFPCDSNSVTEKPMENDDNNKLLPPVVPQPIENLDRFCVIKERMTOALRHFKELTEL  
NVLAQVWAPVRNGNRYVLTTSQGPFVLDPHSNGLHQYRTASLMYMFADGENDGTGLPGRVFQHKLPEW  
TPNVLYYSNKEYPRRDHAEHYNVRGTLALPVFEPALQSCVGVLELIMTSQKINYGPEVEKICKALEAVNLKSSEILE  
PPYTQICNEGRQNALSEILEILTVVCETHNLPLAQTWVPCRHRSVLAHGGGLKKICSSFDGSCMGQVCMISITDV  
ASYIIDPHLWGFREACVEHHLQQGQGVAGRAFSSHSMCFPCNITQFCKTDYPLVHYALMFGLTSCFAICLRSSHT  
GDDDYVLEFFLPPRITHFSEQKTLVGSILATMKQHFQSLKIAAGVELEDGGSVEIEATNERVTLRLESIPQASVQS  
PPGPGGSPNMVEEVKDPSEQQTMMNCNDMNEGGAHGDNAGGNIDQMSSLETMTMKKPSERKRGKTEK  
SISLEVLQRYFAGSLKDAAKSLGVCPTTMKRICRQHGISRWPSRKINKVNRSLSKLKRVIESVQGAEGAFGLNSLS  
TSPLPVVGSFPEPSTPNKFSQQASMRPLESQMKENEIDASKILEIEDPLLGGMTQNLKVFNDKGPRRIRTGSGS  
SEDSTNPTSHGSCYGPPIESSHVKDISITSNNERCVVPRGSPSSPLQPINLNSPPIPIPDIVLTELQEPFGGMLI  
EDAGSSKDLRLNCPASAAEAILEDQVPEACPTNPPGCSLAPKRPVDTLGKTVTPFAAKKEMKTVTIKATYREDII  
RFRVSLTCGIVELKEEVSKRLKLEVGTFDIKYLDQEWVLIACDADLQECIDVSRSSASHIIRVLVHDITSNLGSSC  
ESSGE

>Lupinus\_angustifolius\_OIW93669

MDSTHATFLTLLVFKNTIREELIRSVHVYKVRGGKEREVEFEVSESGSYGEMQASPILRNPKLMIPGLLNDL  
RVIELPCKSEDRSIPSDSPGECQAKTNDQCQPPKKTMPMLRQDLNCLPIDDDMESLDNKLVDVETLPGIMEKKR  
RAHSDHIAKIALPDLVKYFDVPIIEASRLNVGLTVLKRKCREFGIPRWPHRKLKSLDGLIHDLQEEARQQEAGEA  
AAEAVAERKRMLESEKENIERKPSVDIKYETKRFRQEIFKKRHRARILQKQISTLSNT

>Lupinus\_angustifolius\_OIW14789

MGDDATILDDGTISMDFDYMNELFFDGCWLETTAEEDFPLFDSSLSFVNVLENEHESQEALFSTQDNIVNVD  
VSSNKQNQSEIQSLEGASEGFTRWWIAPTPNPNPGTSYSVMEKLMKGLKCIHDLNRNKDMLIQIWWPVNRGG  
KQILTTNDHQFCLGTRSTNLAKYREISMRYHFSTEEDGSKGLVPGLPGRVFKEKVPWETPDVRLFRIDEYPRVDH  
AQEYEVGRGLALPIFEQGSRTCLGVIEVMTTSQNLNRYPELESVCKALEAVDLRSSKLSSIPDLKASHKSYEAVLPEI  
REVFRSACEMHKLPLAQTWIPCIQQGKEGCRHSEDNYLHCISPVEHACYVNDPSIRAFHDACEHHLLKGQGV  
AGGAYMTNQPCFSSDITSLSKTDYPLSHHARMFGLQGAVAICLSIYNSMDDYVLEFFLPVNCIDSEEHKRMILTS  
LSMIIQRVCHSLRVITDKLESETNLLVDEVTAADNRSRRTAICKEVLQDGMVDSLDTEEKSKGAKFSDLRQQQ  
DLKGNLDSVGGCPTFGEGLNLSVGISKTEKKRTKADKTITLQVLQQHFAGSLKDAAKNIGVCTTTLRICRRHGI

>Lupinus\_angustifolius\_OIV98021

>Medicago\_truncatula\_Medtr3g115400.2

>Medicago\_truncatula\_Medtr3g465110.1

>Medicago\_truncatula\_Medtr3g104830.1

>Medicago\_truncatula\_Medtr3g091700.1

MDFFTQEITQSFNWFQVQPQQNDTDKIMGIAPFDDFFFDWATQFSYQSNHFYMNDFDDLNFNDFNL  
PHLDQNNFEVDKKPLNVVLPGLGHYNHKGTVGYVEASVKTESGFVSFVKKENEWENQELSSVLPLALQSSSTS  
IIRKRSSSLQFDDIKKHFDVPITMAAKKLVNGVTFLLKKRCRELNITRWPHRKLRLMLLLIDNLKDKGLTKEVAMLE

KQKKMLEKLPGMHLNDEIKLRQACFKANYKNRKLIALCP

>Medicago\_truncatula\_Medtr3g435550.1

MTDYGYGDAKNVVPWMWNELDAGFYSDKHIFSISNIIGENVAKEIVKGKRCRENSARMLTKETISEFYFMPISQ  
AARELNVGLTHLKKRCRDLGIQRWPHRKLMSLQTLIKNVQEQGNEYDEKIRNAVEVLQKEMKKVEEKPDLQLA  
ENTKRLRQACFKANYKKRRLMVMRLMDQSSISESSNVDDNHKMGY

>Medicago\_truncatula\_Medtr2g099350.1

MEYPYYSKGGGIGYWQSPGTQFEGPTSLDGGINNLSVEDMPNSFSELMNFDYAGLCSPSTTDQIMTNELPS  
LASALYQLPDGFNPVEPNSGQFYGGNYNNFESSPIFGEKIVCQQMDTLLGFLDNSNDANNSSSRQKFDDPSQH  
VNAFDMGNYVIARPAQALISRPPALSLDERMLKALSFFKESAGGGILAQVWVPIKHDGQVLLSTSEQPYLLDQML  
AGYREVSRTFRFSTEGKPGCIPGLPGRVFISKVPEWTSNVGYNPKKEYLRAEHARNHEVRGSIAPFIDLHSGLPC  
SAVLELVTTKEKLDLDFRELEIICRSLQLVNLRTTASSRLLPECLSTNKRAALTEIVDLRSVCYAHRLPLALTWIPCFYT  
DGTRDETTRIQUIKEGNSSSREKNILCIEESACYITDRVMEGFVHACIEHPLEEGNGVAGKALQSNHPFFYSDVKTY  
DISEYPLVHHARKFNLGAVAIRLSIYTNNDDYLEFFLPINMKGSSSEQQLLDNLSGTMQKICKSLRTVSGAEIS  
GMESSVVGFGKKNVPSFPSTSTRNSQVSLINEKDGSVQKLSLDTSNLRNNGNKPSCNQENNGSRRRVEKKRNT  
SEKNVSLSVLQQYFSGSLKDAKSIGVCPTTLKRICRHHGISRWPSRKINKVNRSLKKIQTVLDSVQGVVEGGLKFD  
PSSGAFVAGGTTTEEINENKSLLFPERSTTQDSEPM SQNAVSVPSDENLENKWEGKLKETNTCSIDCSEDSKSF  
AMDDCPEQAYIGSVLAKCDEWVLNNGGLREEKRKHSTIGQRTSSFAVDEMDTGADGDDDDVVEHNHPTSSS  
LTDSSNGSGSMIHGSSSGYQNFKNQKPSKGKSTIVDSGSKIVVKATYGEDTIRFKFDPSTGYKYLYEEVAARFKLQ  
DGSFQLKYLDDEEEWVMLVNDSDLQVCLEILNDMGTHNARFLVRDIPCTFGSSGSSSCYLGGSS

>Medicago\_truncatula\_Medtr5g099060.1

MEYGGGLVADGGVFGPMVGGGGGDQADIIIEELLGEGCWIEASENSLMAMQQTTPQSQYMSNNNNIPMG  
MGEGDHFNHHHHHHPPHHQMECTAPAAHDDQQESGFVVGKRWVIGPRANPGPTTSVKERLVVAVGY  
LKEYTKNSSNNVLIQIWWPMMRRRSALIHQTQNHYLQQESSAPVSVNPNMNVHVRFFRSHDYPRHQQQQQYG  
SLLALPVFERGSGTCLGVIEFVISNQT LINYRPQLDHLNALEAVDFRSSHNMNIPQAVKVFEELYEA AVNEIMEV  
LASVCKTHNLPLALTWAPCLQQQQGGGKGSSGASGCGVSTMSCCISTVDSACYVGDMDVLGFQEACSEYHLF  
NGQGIVGTAFTTTKPCFAIDITAFSKSEYPLAHHANMFGLHA AVAIPLRSVYTGSAADFVLEFFLPKDCRDTEQQ  
KQMLNSLSLVVQQACRSLHLHVVMDDNNNNNMNDNNSADHDHDQFTFPTTNSYMPSSASEPLSQVDAV  
SGCSTKDTSSSCSWIAHMMEAQNKGKGVSVSLEYLQEPKEEFKVTTCNWDREREDNVFSEFGQVLQQQHQD  
QSSNSRASVVSVEAGEESPGACGRRSSSSSSGRKSGDKRRTKA EKTISLPVLRQYFAGSLKDAKSIGVCPTTLKRI  
CRQHGITRWPSRKIKKVGHSLLKLQLVIDSVQGAEGAIQIGSFYASFPELSNATANGGDGNDNSNNSFYNNNH  
GDGIVTSLKSPSACSQTHAGNKLPMTTTTAINHHHVMTENPTGAPLGVDHAFMHASNINIQDYHQLQEDL  
DTKQLLLHFNNNNQILPPRPTVAWNNNNSSSTLLERGA FRVKATFADEKIRFSLQAMWGFRLQLEIARRFNL  
TDMNNLVLYLDDEGEWVVLSCDADLEECKDLHTSSHTRTIRLSLFQASPLNLPNTFRNSSSSSPSS

>Medicago\_truncatula\_Medtr5g024070.1

MDSSLITLLLNNNTIQPELMRSVHVYRECDGGEKEVEREFV FSENGSYVEMKATPILRLLKSFVCEEIFEGYKNGV  
WLCVFAFHAYNVPQFSHIPTFLLVTRNPKLQAIPNLLNDLHMIYKLEPKKEQKSTPESSASEELKGNNND FQPPK  
KVLPVLNQDLNCLPYEEDEAE LLDDETDFGSSAGFLGKKKRAASDHVAKITLSDLAKYFDMPIAEASN NLNVGLT  
VLKRKCREFGIPRWPHRKIKSLDSLIHDLQEEAKHQEMEDKDAAMAVIRRQKMLESEKENIEKRPFMDIQIETK  
RFRQDIFKRRHRARVIEKQNLQLQAPKPSN

>Medicago\_truncatula\_Medtr1g069025.1

MGIAPFDDFFFDWATQFSYRSNHIYKNDFDLENFNFNFNLP HLDQNNFEVDQKPLNVVLP ELPGHYNHKG E  
TVAESGYVEDSVKTGSGFVSFVKKENEWENQELSLVPLALPSSSTGIIRKRSSSLQYDDIKKHFDVPITMAAEKM  
NVGVTLKKRCRELNITRWSHRKLRLMLLIENLKEKGLTEEIAMLEKPKKMLEKLPGMDLNDEIKLRQACFKA  
NYKNRKLIALCP

>Medicago\_truncatula\_Medtr1g100970.1

MSEPEEENQDFPPKTKTSLEEHCSDMDFDLLETSWPLDHMSFITNPMSPFLFSNISDQPSSPLWTFDGEDG  
KLAASALSDCHKIFSCDSNSITEKLVEKDDNKTLLPPLLPPIENLDGYCVIKEKMTQALRYFKEWTELNVLAQVWA  
PVRNGNRYVLTSGQPFVLDPHSNGLNQYRTVSLMYMFSVDGENDGTLGLPGRVFQQKLPEWSPNVLYYSNK  
EYPRRDHAQHYNVRGTLALPVFEPSLQSCIGVIELIMTSLKINYAPEVEKICKALEAVNLRSSSEFLDHPFTQICNEG  
RQNALSEILEILTVCETHNLPLAQTWVPCRHRSVLAHGGGFKKSCSSFDGSCMGQVCMSTTEAAAYIVDAHL  
WGFREACVEHHLQGGQGVAGRAFLSQTMSFCTNITQFCKTDYPLVHYALMFGLTSCFAICLRSFHTGNDYVL  
EFFLPPGITEFHEQKTLGSIFFSTMKQHFQSLNIAAGVELEENGSIIEATDEGIRLRTESIPIAQSIKSPRPDASP  
MEDEEEGVQDPQSEVRGENVGGSDPMTSLGNKNIKKPSERKRKTEKSISLEVLRQYFAGSLKDAAKSLGVCP  
TTMKRICRQHGISRWPSRKINKVNRSLSKLKRVIDSVQRAEGAFDLNSLGNNQLPIVSSFPPESTLNKSSQGGSL  
SNRPSEPQMKENEFDASKVSETNLQJVMENQLLGGGRKHSLEKEVINGKGVTIQEIGKDRKRNRTRSGSSEDSTN  
PTSHGSGCHGSPPIEPTIKDLFIPSNNEQHVVLRSSPEPGMQPTNALNSPTAHMVDNVIAELQEPFGGLIEDA  
GSSKDLRNLCPVAEAILEDMAPEACGNNFPGSSHLAPPKQCIDTINNSATPFAARKEMKTVTIKATYREDIIRFR  
VSLNCGIVELKEEVSKRLKLEVGTFDIKYMDDDNEWVLIACDADLQECMYLSRSSGGSNIIRVLVHDITSNLGSSC  
ESSGE

>Medicago\_truncatula\_Medtr4g068000.1

MEGQYSSKERGGISLWTFPDSGMKSSLNSDDMFNNISELMNFDSYAGWCNGSSSITDQTLTNDLSSFAYDGLN  
LSEHINGPFFMTEIGGNYNVMDSYDEKVLLQEMETQLEFLDNNNETNNNLDSQQNGSYDMCNYIISKSPSW  
SLDERMMSALSFFKESAGGGILAQVWAPIKYGDDFILTSDQPYLLDQKLAGYREVSRSFTFSAEMKMGSCCAG  
LPGRVFNHSHVPEWTSNVGYHYKSEYLRDLHAISHEVRGSIALPISDMNSEVSCCAVLELVTTKEKPNFDKELEFVS  
HALQRVNLRTIMPPRLLPQCVSNNKRAALTEITDVLRAVCHAHSLPLALTWIPCCYSEGKGEESERIRIKEGHITSS  
NEKCVLCIEESACYINDKMGVGGFVHACSEHHEEGQGISGKALQSNHPFFYTDVKAYDVSEYPLVHHARKYNLN  
AAVAIRLRSTYTNDDDYVLEFFLPINMIGSSEQQLLLDNLSDTMRRICKSLRTVSEALRGMESQYEFQKENVS  
GFFPMSRGNSSQIAFSSGDNDLFQMSFNETNLKNSGNQAAYSQATSGSRKQAEKKRSAVEKNVLSVLQQYFS  
GSLKDAAKKIGVCPTTLKRICRQHGISRWPSRKINKVNRSLLKIQTVLDSVQGVGVLFDPHTGGFVAGGSIIQ  
QIGKHNTLKFPEKASVPKLEDEDVLVSNSCEVELEKDNASVDCIEDSTTWLWTKTQDCPKQTTIDYVLEKEQD  
QCGLDNSSLHDIGSHSSFSMIELGFEEGKGADEHNNTSSMTDSSNASGSMVNGSSSGSQSIENQKHSKVK  
ICVDSSESKFAVKANYRGDTIRFKFDPSVGCCQLYEEVAKRFLQNGSFQLKYLDDEEWWMLVNDSDLKECDEV  
LSDIGTHCVKLLVRNIHGGSDS

>Medicago\_truncatula\_Medtr0022s0430.1

MQKSEENHDLPPQKSKPLDENVFSMDYDIDFETSWPLDHISNSMHPFLQNISEQPFSPIWTFSDDDHNIAAS  
GNNKNIITENRVENDDKHKRVTPHIGLPPLQNPHGYCLIKERMTQALRNFKELTELNVLAQVWAPVRNGSRYK  
LTTSGQPFVLDHANSGLHQYRTVSLMYMFSVDGENDEVGLPGRVFQQKLPEWTPNVQYSSKEYSRLNHAL  
HYNVRGTLALPVFEPPGQSCVAVLELIMTSQKINYAPEVDKVKCALEAVNLRSSSEILEHPYSQICNEDRQNALSEI  
LEILTVCETHNLPLAQTWVPCRHRSVLAHGGGLKKNCSFDGYCMGQVCMSSITEVAFYIIDSHTWGFHDACV  
EHHLQGGQGVAGRAFLSQNMCFRNITQFCKTDYPLVHYALMFDLTSSFSICLQSSHTGGDDYVLEFFLPPSINK  
FCEQKGLLSILATMKQNFQSLKVASGVELEEDGSVEIVEIINGTVHSRLESVPPIIQTSLSARHDDASPDMEEGV  
PLDQSRQKIITNFDDINDIGNLDDYAGGSIDQIHSKTETKKKPSLRKRGKAEKSISLEVLRQDYFSGSLKDAAKSLG  
VCPTTMKRICRQHGISRWPSRKIKKVNRSLSKLKCVIESVHGVEGAFLDSPSTSTIPIAAGSFNEPSTSNKFEHH  
TSLSIMPSEPKNENYLDASKSEPQKPLGGMLIEGADSSKDLKNLCPSTDVVLEDQVLEASRIHPPCDFVHMQ  
MQHMDTLNFAAQKEMKIVTIKATYRDDIIRFRVSWNCGIVELREEIAKRLKLEVGTFDIKYLDLDDQEWILVACDA  
DLQECMDILTSGSNIIRLVVHDILSILGSSVESSGE

>Mimosa\_pudica\_Mimpu11703S14211

MDCFFSDFDFPNLDFPHDFSSYFPTSHQETSTLDVSHMTMGLHGMMDLMVPPPLPFESNLFYSNNQFTELENF

NYNFGSDFNFFQLSCNDMVIDEKPCTTILPNHFQSFNLPISDDLKEMEMASSVVLPNESHHQYNFEIQSC  
QSATSLFDGNGFSPLIKQDDDDHETRIFRICYNKKKRSANLELDDIRNYFDVPITTAACKLNVGLTLLKRRCRELNI  
TRWPHRKIKSIKTLIDNVKELGLVEEVAMLEKHKRLMEKMPDVELSEQTKLRQACFKANYKRRRFLALHAPA  
>Mimosa\_pudica\_Mimpu1984S19289

MEYGAALLHNNSAFETLSDESTTSVSEVGDFIDDLFANGCWLETTGHGGSSYNLTNPTSLINDPNLHNYWMTS  
SDPNHPHHQHQQIYQQDQSEVSNFSLFQSESVVANTEVGKRWVWIGPKANPGPSSSVKERLVLAVGYLREYT  
KNTNVILQIWWPTRREDDPSCNNKNLENYYRNVSKVYNHHHQLAGEEESAEDQCRVFLGKLPDHHQHQWAP  
PASVRFFKSHEYVAYVNNFAPHVHHHHNNQQHYDMLRGSALPVPFERGSGTCLGIVEIVIPNHQNNIDFHPQID  
NVCHSLQVSFFFIILLFLLPHLHSATYVYILICLQTVDFNKGACQNLSIPAVKVYDELYLAALNEIVEVLTSVCKTHN  
LPLALTWAPCAQQGKAGLCPNDNFVGCSTVDSACYVADLDDLGFQEACSQYHLLRGQGQIVGTAFTTTKPCF  
ATDITAFSKTEYPLSHHAAMFGLHAAVAIPLRSAYTASQADFVLEFFLPKNCHDGEEQKQMLNLLCIVVQQACRS  
LHVAMDKQMQUEVEEDEDFTFTVGDMFAAAAATKVGGGGGGGAHHHKEETLEFGSCNLEDGSSSKESSWIA  
HMMEAQTQHKGKGVSVSLEYLEPKQEFKVTTNWGFCNNSNSNNGQAFSDYGQVQVNSSSAAASRGMSVE  
GGGESYAFRGGAGRRSSSGGRKSGEKRRTKAEKTISLPVLRQYFAGSLKDAKSIGVCPTTLKRICRQHGITRWP  
SRKIKKVGHSLRKLQLVIDSVQGAEGAIQIGSFYSSFPELSTTNLSPTTTGPSQSSNISEHHSKIQHNNPHHQAAL  
YNHHGGTTLKSPSCCSQTSTIINAASVGGGDILMAENPEASLMMMRQTQHNHEDMKHPSVVEVLAQPLQE  
NNASVGGGGFRVKATFGDEKIRFSLHPSWGFRELQLEIARRFNLEDVSNIGLKYLDEEGEWVLLTCDADLEESKD  
TYRSSKSRTMRFALFQTSPLNLANTTFGSNSS

>Mimosa\_pudica\_Mimpu40297S10319

MEYPSSHKGKDSEYWSSPQAQVEEPASLDGDGDAKKPISEDMLTTFSELINLDAYAGWCNSPPIDRVLANGLSSS  
ASVPYASLDEFNLMGESGSLASDVNKNYNMTRSFNPNSAEKAAFQQMEAQLELSDGGNDAGNLNYKHYPN  
ESVEELGSSMISNYIVSRQPGWSLDERMLWALSFKESAGGGILAQVWVPIKHGDQVILTSEQPYLLDQMLA  
GYREVSRTFTFSAEGRPGSVLGLPGRVFISKVPEWTSNNGYTYKAEYLRIEHAIDHKVRGSIAPVFDLYSEMPCC  
AVLELATTNEKTDRELEILCQALQVNLRTAVTPRLLPQSLSSKKRAALMEIIDVLRVCHAHSLPLALTWIPCC  
YLKGIDNETMSALNKEDHSSSSDKLVLCIEESACYINDRKMEGFVHACVEHHLEEGQGTAGKAIQSNQPFYPD  
VKGYDVGEYPLVQHARKYNLNAAVAIRLRSTFTNDDYILEFFLPVNMGRSSEQQLLLDNLSGTMQRICKSLRT  
VTDAELSGISGLVNFENGKVRFLPISGRNSQIGLMDVDKDSVSKISLKACNLRNNGIETTCNQEMNRSKRQV  
EKKRSTGEKNVSLRVLQYFSGSLKDAKSIGVCPTTLKRICRQHGISRWPSRKINKVNRSLKKIQTVLDSVQGV  
GGLKFDPTGGFVTGGSVIQEFDAHGRLLFSEKSMMPMQDPECVANHTVSVDPVPYSERENS DIKLEDNDVYLA  
DNQLVCRQSLIVPNSGEGAMKKAKAFVDFSQDSKSMALDDGSCQMVKSQGCPKQAYNLGPVAKKDGNW  
GLNMNGQAAKNSGPDNVSWSSSSSLVADEIENIVDGDNGIVEHSHPTSSNVTDSNNGSGSMIHGSSSGAQSSE  
NPRRPKVKSVLVDSGSKIIVKATYKDDTVRFRFDPSAGCFQLYEEVATRFKLHNGSFQLKYLDDEE EWVMLVND  
DLQECVEILED MSTSCAKFLVRDMPFLSSSGSSSFLQGS

>Mimosa\_pudica\_Mimpu12208S14529

MQMQLQTHSKKEKAAFSLLRHPSLFLTHADTPSPYTHDIPATFMASLLTRTPFLVDEERACVAREGWE GEGGGK  
RVRVLWECEMRATPILILSVHNNLGVCEEYQNGVWLCVNPQLQMIPSLNLDRIIHELNCKSKENGMLQLSPD  
ERFQGNND SHQPRKILLQDLNCLPYPDMPQLDREVDEESNVEKKKRAASKDVASIGLADLVKYFDVPIVEA  
SKNLKVGLTVLKRKREFGIPRWPHRKISLDNLIHDLQKNIQEVAENEKENDGAVMAVTKRQKMLEYEKENI  
ERKPSLDIRKETKRFRQDVFKRKHARTMTKQSSSNYNSLHLKVKEEKATI

>Mimosa\_pudica\_Mimpu36607S22996

MGDPNPMNNVGPYHDDTNMILNFDPTLLDSSNIFPEVGDDAAVQALLDDIAPYLDPMFSPDHKFEAGPS  
SQFHTHDLPLPEQLPHPHQQNYNDNNHNVVATSLCPNLPVPFSCCTFCQTLREIVYTDGVLHFSKLQIHGKL  
GLISHAVLYQNNVGVSSAHQPFQIFDFSQKSIPQIKIFLIRHCLNQNSMGYFMMRDPLSLYESLACGLDWAED  
SNNDKLSDHGPDGVTSGVKFGMEQQVNAENDMERTPTSGMKLSDMRNLFDLPIEAKAKLKLCPTEMKKI

CRKHGLERWPQRKVKSIGRQISILRRALESGDASTRSQTEAEIERLEQEMARHCGGFPPTSLNQESK

>Mimosa\_pudica\_Mimpu6940S04388

MGDPNPMNNVGPYHDDDTNMILNFDPTLLDSSNNIFEVGDDAAVQALLDDIAPFLDPMFSPDHKFEAGPS  
SQFHTHDLPLPEQLPHPHQQNYNDNNHNHVVATSLPCPNLPVPFSCFCQTLREIVYTDGVFHFSLQIHGKL  
SLISHAVLYQNNVDVGSSAHQPFQIFDFSQKSIPQIKIFLIRHCLNQNSMGYFMMRDPLSLYYESLACGLDWAEDS  
NNDKLSDHGPDGVTSGVKFGMEQQVNAENDMERTPTSGMKLSDMRNLFDLPIEKAACKLKCPTMCKKIC  
RKHGLERWPQRKVKSIGRQISILRRALESGDASTRSQTEAEIERLEQEMARHCGGFPPTSLNQEPK

>Mimosa\_pudica\_Mimpu4886S10857

MGDPWTIVPYNDPYDIPIENILDFQHHHFSLLPDPLSNNNRHNNNNNNPSPSPQHSNAIFQSVNNDLNS  
GHHNQQVVIHDTMCEQIPHQSGNFEAGPSQIHGDNHRQEINNNHNSINYNVHSLNFPEATQITQWPDQP  
APFLSCCCQLREVIHTNGIQFVKLEIHGTLGVIFHAILRHNNINAGSSGDQQTMLDFSSFSMEGIKNFMKQYCA  
EKNAAGCFTLPDPLSGYYEALCVGMEWNEDLNDELDTFTDNNGGPSDDTDPMDKVDKASLAIQRERAGK  
MKLCDFSDVFLPIEDAAKHVNLCPTVVKKICRKQGLPRWPHRKIKSIMRKVNILRGLNSAEAAASRAQTEAIIQ  
RLHEEIVEHCGGIVPTSLNFNA

>Mimosa\_pudica\_Mimpu144438S15740

MGDNVVSPPCGAMLDSSLDIFYMEEIFSDGWCLETAADGSDFLRSPSAASIPLLDSSFSWPAFENNGHVSLEQ  
QSKSLLMIGDYQEEAQVNINNNNDNSNRSVGKGDIIEVSGTGNNMSDNSEVVRRLWIGPMVNPSPESVLER  
LIKALVYIRDFNRDKDMLLQLWVPVNRREGGRILSTRDLPFSLESSPNLAKYREISAKYHFPAEYSRGLVPGLPGR  
VFKEKVPWTPDVRFFRSDEYPRVDHAQEYDVRGSLAIPVFEKSSICLGVIEAVMTAQKIKYFPELESVCNALQ  
AVDLRSKNISSIQNDKECNKSYEALPEIHEVLRSAEMHKLPLAQAWVPCNKQKQKGRHTDDNYIHCIFPVE  
HACYVGDPRVQGFHEACSEHLLKGQGVTEAYMTNQPCFSTDVTSYSKTDYPLSHHARIFGLRSAVALRLRSI  
HNSTDDFVLEFFLPVNCIDSEEQKKMLSSLSMIIQRVCHSLRVISNKELENETNLSMNEVTVPAETGSARMEFEQ  
CRNITSHGTEKENSNETLTRQVSNNMSQQEDTVLKGNDNGWECSSFEGGLPVAGLSKTGDKRRTKAETITLQ  
VLRQYFAGSLKDAAKNIGVCTTTLKRICRQHGIKRWPSRKIKKVGHSLQKLQLVIDSVQGGSSAFQIDSFYSKFPE  
LASPNLPGSSLFSTKSQDLPIPSNTRPETGFMSPAPSTSCNQSSSSSHSSNMSEFPLHAQNIAGGKVPRVGD  
DSVDGVMKRVPSSELGLKLSQDTAELLPTSQSQETPCVHPNTVLKGSNTVHPKEDTHRVKVTFREEKTRFRMP  
KWSYEDLLWEIAWRFNIDDMRKFDIKYLDSDWVLLTCDADLEECIDVCQHSQSSTIKLCLQDKKS

>Mimosa\_pudica\_Mimpu1764S07803

MVGNQNEALVGGWNLESELVPFPTYQFSSPDLGSGYGYLGLDWADEAALPWNIMEPDAMYETLSIEPTLSV  
QDYGYYDIKKGLLNEIYDAFSDSNKAVYVDSGKELKEKDRWVKREELSGSTKLSRKTISQFYFMPITKAAKEL  
NVGLTLLKKRCRELGIIRWPHRKLMSLQTLINNVKELGKEGGQEESEKLRDALEILAKEKKMLEEMPDLQLEDN  
TKRLRQACFKANYKKRKLMSVSSMESECTRSECDYEDQTDIKLMLPSTPLHFTA

>Mimosa\_pudica\_Mimpu5007S24951

MSDSDDEIQNPQITPQSKPLEPASVMDFDLDLEASCWPLDQIGFSSSSNPMSPFLISATSDHQPSSPLWVFS  
VDDDRQAKLANASALSDVHRLSDDSNSVAEKPVENEDTKKTPPPFVSLPIPLETPEWYCLIKEKMTQALRYFK  
EWADQNVLAQVWAPVRMGNQYVLTSSGQPFVLDPHSNGLYQYRTVSLMYMFSASGDNDGILGLPGRVHFQ  
KLPEWSPNVQYYSKEYPRRNHAQHYNVRGTVALPVFEPGSGQSCIGVLELIMTSQKINYAPEVDKICKALEVGFL  
PPLLSISCSACFIHLLPVFVQAVNLKSSEILEHQFTQICNESRQNALAEILEILTVVCETHKLPLAQTWVPCRHSV  
LANGGGLKKSCSSFDGSCMGQVCMSTTDVAFYVIDAHMWGFHEACAHHLLQGGQGVAGRAYLSGNMSFC  
GNITQFCKTEYPLVHYALMFGVTSSFAVCLQSSHTGRDDYILEFFLPPEVTDLNEQKIMLGSIVATMKQHFHSLKI  
AAGLELEKECSVEIIEATNESVYSRLESIMITQPTLPHRPDALPNMREISPLDTSEQQMTFLDDMIGGGSLGDRA  
GGTSDQRSPLETKNAKKPSEKRGKTEKSISLEVLQNYFAGSLKDAAKSLGVCPTTMKRICRQHGISRWPSRKIN  
KVNRSLSKLKRVIESVQGAEGAFLNSLSTSPLPMAVGLPDPSNKFRCQASPSAQLAEPMPMKDSELDASKVSET  
SRQTELEHHLFRGRVQSPDTHEKSGSSQDFSKGPRGHRTGSASSEDGANPGSHGSGHSGSPPIESSPKDIFVTT

HTDQYVAARGSPELRPTSKQNSPPGYAVPNLMPTELQESFGGMLIEDAGSSKDLRNLCPAVADANVEDHLPEA  
SAAFPPGSDLGFKQCANNLGDTMAPFAARREMKTVTIKATYREDIIRFRISISSGIMELKEEVSKRLKLEVGTFDIK  
YLDDDQEWVLIVCDADLQECMDISRSSDSNIIRLLVHDITSNLGSSCESSGE

>Nissolia\_schottii\_Nissc3812S22614

MDNSFSPKGMGIGYWTSPQGGWEGLTLFDGGTKNSVSEEMVNKSELMEFDTYAAGWCNIPSMPDHSLGN  
GLSSFASVPCSPDGFNLLEPGNGPIFMTEDSSNYKAMESSSGYGEKVVLQQMDTQLGMSDDANDTNNLDSK  
PKFDGSFQQFNTFDVGNHMIPGPYEWSLDERMLRALSSFKESVGGGILAQWLWVPMKHGDEFILTTSEQPYLLD  
HTLSGYREVSRTFTFSVDGKSGSSPGLPGRVFKSHVPEWTS HVGYYSKNEYLRMDHAINHKVRGSIAPITDLHS  
ELPCCAVLELVTTKEKPDFDRELEVVSNALQLVDLQTTMPRLLSQCLSDNKAALTEINDVLRVCHAHRLPLAL  
TWIPCFYSEGIGDEAARIQIKEGHTGFNEKSVLCTEESACYINDRAVGGFVHACVEHPLEEGQGIAGKARQSNH  
PPFYPDVKEYDVTEYPLVQHARKYNLNAAVAVRLRSTYTNDDDYILEFFLPVNMGRSQEQQLLLDNLSGIMQRI  
STSLRTVSDAELSGIEGSQVENVSSFFPMSRINS DIALNGNRDSVQMMSLKPSNLRNNGIETAHNKAMNGSRR  
QVEKKRSTVEKNVSLSVLQKYFSGSLKDAAKSIGVCPPTLKRICRQHGILRWPSRKINKVNRSLLKKIQTVLDSVQG  
VEGGLKFDPYTGGFVTGGSINQEIDAHKSFLPEKHSKADTVAVPPAPGSKGDNLAVKFEDDDICMDGNQLLH  
SSVLISDSKGEKLDQASSVDFSEDSKSVAIWGMSSSLGAKNSSHDIAHSPSSLIADIEIHADGADGAVEHN  
HLSSSSMTNSSNSSGSIHRSSSCSSSENDKRKSVKSTCVVDSGSKMIVKATYREDTIRFKFNPSAGCLQLYEEVAT  
RFKLHNGSFQLKYLDDDEWVMMVNDSDLQECVEILDDLGRNVKFLVRSMPSSLSSRQSNCSFLADSS

>Nissolia\_schottii\_Nissc119281S13298

MREGFMEEFYDWEWEPQLTHSKHLWLNEEEFPQLLTSFNDFNGFDLPSLDDYFAAVDQKPLNTGSNTGTE  
SVVCVKQENQVEEEHILPINIEYKKASSLD FEEIKKHFNPIAEAAKRMKLGVTLLKRRCRELNIVRWPHRKIKSL  
HLLIENLKEMGMENEVAMLEEHKEMLENLPWMELSQETKKLRQAFFKAKFKLRRRN LAPKP

>Nissolia\_schottii\_Nissc17691S16468

MSESEENPDLSVPRSKAQQQQQQQQQQAGGGGGGGVCAMDFDLLEGPWPLDHLSFVTSNPMSPF  
LFSISSEQPCSP LWAFSDAEDDRHSRVAASAFSDCHKIFSSDSNSITEKPRENEDNKRLPLLAIPSTLEILDSYCVI  
KERMTQALRHFKELTEQNVLAQVWAPVRNGNRYVLTTSQGPFFLDAHTSGLHQYRTVSLMYVFSVDGENDG  
SLGLPGRVFQQLPEWTPDVQYYSSKEYPRRDHAQHYNVHGTALPVFEPSVQSCVGVLEIMTSQKINYAPEV  
DKICKALKAVNLKSSEILDHQYNQICNEGRQNALAEILEILTVCETHNLPLAQTWVPCRHSVLAHGGGLKKICS  
SFDGSCMGKVCMTT DIAFYIIDAHLWGFREACVEHHLQQGQGVAGRAFLSHNMCFCGNITQFCKTDYPLVH  
YALMFGLTSCFSVCLRSSHTGNDEYVLEFFLPSRITDFHEQKTLGSLATMKQHFQSLKIAAGVELEEDGLIEIEVT  
NERVHLRLESIPAIQFIQSPVPDASPDVGEEVPQDPPEQKIMMYCNDINN VGGLDNARGSLHVSSLEPKNI  
KKPSEKRKGTEKSISLEVLQQHFAGSLKDAAKSLGVCPTTMKRICRQHGISRWPSRKINKVNRSLSKLKRVIESV  
QGAEGAFGLNPLSTSPLSIPVGSFPEPSTPNKFSQQASLSMRQSDPQVKENELDAFKVSETNRQAGTEDQLLG  
GEGTQSLDKATNDKGGSPHVVGEEPKRTRAGSGSSADSTNPTSHGSGCHGSPPIESSPVKDIFITPNSDQC CVIRS  
PESSLQPINTLNSPTAYPVPDIVATELQEPFGGMLIEDAGSSKDLRNLCP SVAEAILEDLASEPFGTNPPCPDLAPK  
QSM DALKNTVTPFAARKEMKTVTIKATYREDIIRFRVSLDCGIVELKEEVAKRLKLEVGTFDIKY LDDDHEWVLIA  
CDADLQECIDVSRSSASNIIRVLVHDITSNLGSSCESSGE

>Nissolia\_schottii\_Nissc12880S13849

MFFNLAMKTTFTLLTVFKNTIREELIRSVHVYEVKDGVKVEVEREFVFESESGSYGEMRATPILMSQGNFCVSEV  
SEGYKDGWVLCIFAFHSDQMPQFSSIPSLLLVSRNPKLRTIPTLLKDLGMIYKLDCKSEDKDVLEDKDV LSDSTGE  
ECQDNSKDFQPSREVIPVFEQDLNCLPYEHDMSEL PDIKLDDETLPGSVEKKRRAASGRVAKIELSDLAKHFDM  
PIVEAARQLNVGLTVLKKKCRDFGIPRWPHRKIKSLDSLIQDLQTRTLQEEVEHQGPEDQAMDVAEKRRMLESE  
KENIEKKPFMDIKSETKRFRQDMFKKRHKARAHGKQNSAAA STNKKTTT

>Nissolia\_schottii\_Nissc524265S09652

MLPNPLTSHVLFNHNSSMDSSKTTLLTNLLVFTNTLQQELIRSVHVYRKCDGEEREVVEREFVFESESGSYGEM

QANPVLTPQLFRVPQVSQGFQNGMWLCIFAFHADQRPQFSHIPDLLLLTRNPKLQEIPNLLNDLKMIYKLDGKE  
EEKDDPQDSPQEEQQESSNDSEQPHKELLVFHQDLNCLPYDEDTSVSQDNEINDESSSGLAAKRRRAVRAPSD  
HIAKLALSDLVKYFDMPIVEASRNLNVLTVLKKKCREFGIPRWPBHRKIKSLDSLHDLQEEAKNQESKDKDAVM  
AVAKRQKMLECEKESIEKKPFMDIQIETKRFRQDVFKRRHRARAIENKGSTVSST

>Nissolia\_schottii\_Nissc2388S07083

MPESGGKNSDLPSKSKPQEEHGFAMDFDIYLESSWPLLDHVSNNPMSPFLITTSSEQPFSPLWTFSDVEEDHK  
HVRISGSGDSNAVAEIPVENDDKKNLVPFVPLPLKNPDGYLIKERMTOALRYFKELTEQNFLAQVWAPVRN  
GNRYALTTSQQPFVLDPRSNRLHQYRTVSLTYMFSVDGGNDEILGLPGRVFLQKLPEWTPDVQYSSKEYSRLN  
HAQHYNVHGTALP VFESPGQSCVGVLEIMTSKKINYAPEVDKVC KALEAVNLRSEILEHPYAQICNEGRQNA  
LAEILEILTVCETHKLPLAQTWVPCKHRSVLAHGGGFKSCCSFDGSCMGQVCMSTSDVAFYIIDAHWTGWFHE  
ACAEHHLQGGQGVAGRAFLSHNMCFCGNVTQFCKTDYPLVHYALMFGLTSCFAICLQSSHTGNDDYVLEFFLP  
PMITDFYEQKTMVLSILTTMKQHFQSLKIAAGVGL EEGCSVEVIEAINGRNHLSLESIPVNQSAKSPPRLDVSPHK  
SEGVPPQQGPSEQKIMTYFEDINDGGNLGDTAGGAIDQISSLETKIKKKPSERKRGKAECTISLEVLQRYFTGSLK  
DAAKSLGVCPTTMKRICRQHGISRWPSRKINKVNRSLSKLKCVIESVQGAEGA FGFDSASKSPVAAA DSFTEPS  
TSKMFNHKASLSIRPSEPQMNENDFDIFRMSKTNRQAGLEDQLLGLGGKQSPEKAIHEEGGSSEESANPNAPG  
SWHGSPPNESSPPKDIFGTLKNEQCLVLRDSMESTMQPKNTLHRATVYTALNVETTEQE EFPGRMLIEGVGSSK  
NLRNLCPSADAVLEDQVPEASGINPPCRSLAPNQCLEDTLKN AVTPSVSDRKEMKSMTIKATYREDIIRFRVSLN  
CGIVELQEEISKRLKLEVGTFDIKYLD DDSEWVLISCDADLQECIYILRSSGSGNMIRLVVHDLASILGSSCESSGGLG

>Nissolia\_schottii\_Nissc1008S04822

MEYPFSPKGRGTGYWASPRQTWEGSTSLDCGMRNSISDVVPNSFSELMNFDPYASLCNSPSSMADQVLANGI  
PSFVSVPYPPIPNGFNLGEQHSGQFFMAEVGGSYNNAAGSSPNYGEKAVFQQMDTLLGFFDDADANNLNSRQ  
KIDGSFQHLDAFDSGNCIVSRSPSLSLDERMLKALSFFKESAGGGILAQVWVPIKHGDQFILSTSEQPYLLDQML  
AGYREVSRTFTFAEGKSGSSPGLPGRVFISKVPEWTSNVGYYNKTEYLRMDHAISHEVRGSIAFPICD VDSEQS  
CCAVLELVTTREKPDFGKELEIVCHALQNVNLTTTVPRLLPQCVSDNKRAALTEIIDVLRVCHAHRLPLALTWIP  
CCYTEGTGGNDTRIRIKEGHSSSSEKILCIESSCYITDRAMEGFVHACIEHHLEEEKGIAGKALQSNHPFFYPDV  
KAYNIGEYPLVHHARKYNLNAVAIRLRSTYTKDDDYILEFFLPVNMKGSSEQQLLLDSLGMTQKICRSLRTVSE  
AELSRIEGSQVGFEKNAPSSFPMSRRNSQVSLNSNHDSVHKMSINTSNLSNNGIEPSHSQETSGSGKQVEKK  
RSEKNVLSVLQYQYFSGSLKDAAKSIGAVCPTTLKRICRQHGISRWPSRKIKKVNSLKKIQTVLDAVNGVKGRK  
FYPSMGALVDAGGSIVQEIDHKAVSPDKSTIKEKGKWMNKGDLRVEKSNGSNSLA AEEIDTSVDGDDGDFV  
QHNHPTSSGLTDSSNGSQSLENKIKNSK GKSTSIIDSGSRIHV KATYGEDTVRFKFDPSACCSKLYEEVATRFKLQN  
GSFQLKYLDDEKEWVMLFSDSDLQECLEIMDEAGTRSVKFLVRDMTYILSSSSSSCYLGCST

>Nissolia\_schottii\_Nissc337S21912

MRDGAVSSSTMMEAPPPPEGGTTTSM EFDYNMDELFFDGCWLAATADGSDLLMQNPFSNPLYDPSSISF  
PWPSPLDTIEPPHNGVHHQQHEPHEAQPPPLCHDIVKAAAAAADGAATNCSNQLQQLQSEIQSLEGSSEVL  
RRWWIAPSPIPGGPGGSYSVVEKLVRALMCIKDVIISKDMLIQIWWVPVSRGGRQILT TNGLPFSLETGSANLAKY  
REISVAYQFSTEEDSKGLVAGLPGRVFKEKVP EWTPDVRRFRCSEYPRVDHAQEYDVRGSLALPVFEQGSGNCL  
GVVEVVMTTQQIKYGHELESVCKALEAVDLRSSKLPTIQNVKACEKSYEALPEIQEVLRSACEKHKLPLAQTWIS  
CIQQGKEGCRHSEDNYFHCISPVEHACYVGDPSIRFFHEACSEHHLLKGQGVAGEAFMTNQPCFSTDITS LCKT  
DYPLSHHARMFGLRAAVAIRLSIYCTDDFVLEFFLPVNCIDGEEQRKMLTSLSLIIQRVCHSLRVISDEEELEETN  
LSVDEVIALADSRIARTEKVVWTEPPQSVMVASLGTEESSETMGGSFSDPRQQEENHV LKGNLDSAGDCSTFES  
VGISKTGVKKRTKAETTITLQVLRQYFAGSLKDAAKNIGVCTTT LKRICRQHGIKRWPSRKIKKVGHSLQKLQLVID  
SVQGASGAFQIDSFYSKFPDLASPGTSLFTTLKQSDNNPNLSLTQPDPGGSLSPEGTSKSPSSSCSQSSISHLCSS  
MADQHHTTNGVAGEHSGDHGV LKRIRSEAEKTLIEDNRAKLIMPRSQSQELLGQNPKTEYHHHRTLSEANS  
KKENAHHRVKV TYGDEKARFRMPKNWGYEDLMEEVSRRFNISDLTKFDVKYLD DDSEWVLLTCDADLEECIDV

CQSSSESSSTIKLCLQNSNNCMRSSFAEFR

>Nissolia\_schottii\_Nissc91520S32148

MLMLANKAFFVVFLASSINSNGYRSVDWLPEFPPFMQDGYLDYPWDPLSETLGIEPISTVQEYDIYDESVKGFS  
AWEEVYENWEEGGRGDDNMKKKAKRGRGEEMRSGSTKMLSRKAISEYFYMPITKAAKELDVGLTLLKKRCRE  
LGIRRWPHRKLMSLQTLINNIQEIGGDSKLRNAIEILEKEKKLLEEMPDMQLEDTTKRLRQACFKANYKKRRL  
IGSRDSSSCLA

>Nissolia\_schottii\_Nissc524354S25958

MISFCRKSIEDVKNFLVQYCVGQTSAGFYILQDPLSSYYEALCIGMEWIEELGDDTDDLSPNSDDDNEPEGDKRV  
GKGRRAHYSAQRDRAGKMTLEDLDYFHLPIEEAAKQVNLCPVLKKICRKAQLGRWPYRKIRSIKKISALKR  
TLESNNDESRARIQGEISRLEAKIREHCVGLYPTALVIP

>Parasponia\_andersonii\_PanWU01x14\_068870.1

MEYSAQLIVPKIENPHGFDWLFHENPSENLLPDFPPVQTFEANYPLPFSCLYDQLPSIDFQNFEDIDGGFFFDN  
AFSYCEDPMVDEKPKTSLVTSFSHNNKNSTSDQIGFEVSMLEIEIFGSSEKNEETRSCGRKKKKVVELELDDIQ  
KYFDVPIKEAAKELRVGVTRLKKRCRELNIMRWPHRKLKSLKYLLNNVKKMGLNSNEIMMLEEQQLLEVAPD  
MDLTERAKKLQACFKANYKSKRSLEAARG

>Parasponia\_andersonii\_PanWU01x14\_071980.1

MADPGAIMSYSDLYDGPFSENLSNILDYENPSLLDLPEPDHIGGQGPSNTSDNHNPNHVTLEQNSATIWDLP  
DFNVDQCLGSGPNNQPGPSRIRDHQETSNNDDQAIENLELPQVNNNNVGGNSRTLPTWSPPPVPFNC  
TCCQVLEIIHVNEFNMYMKLEIHGRLGMICHVIWESRSSTNNNVTTSTSSGNDPQFEMFDFCRQSIEDVKRFL  
VEYCSRRKVEGYVMLHDPLSIFYEALCVGLEWDELSNNDFFVPTSPPHNSGGAEENYTEQQGQEEQQVTHQ  
QEQTVETRPETTQIIDVERNSRISLAEQRQRTGKLTMDLREYLHLTIEDAAKAMNVCPTVLKKICRRHNLPRWP  
YRKIRSIKRQISSLRPNLESNDAAVREQAQAEIDRLRQEATNICAGVDVVEL

>Parasponia\_andersonii\_PanWU01x14\_111140.1

MEYGAMMPSNAYGTSFSDATMEVDFMDQLLLEGWDPAVAAAATGLNFTQPAAPCSSAPRS LIETSHYMPSPF  
ESSNTSTAHLITTHHHQIYQDHQETEEGGSDHLQENHSSESNNNNFFMNEANEVKGRLWIGPRPNPGTGPCS  
SVKERLTALDYLKECTDRDVLIIQWVPIRRGGGRQILTTYDQPYSLDPNCKSLASYRMVSREYQFLCEEDSAESV  
GLPSQAFLGKLPEWTPDVRYFRSYEYPRINYAKQYNVRGSLALPIFERGNGTCLGVVEIVMTTQKVNYRPEIEYV  
CQALEMPITLQAVDLRSFQNFSPPAVKAVDLRSFQNFSPPAVKVCDELYQAALSEIVEVLVSCKIHRPLALTWA  
PCHQQGKGGCRHSDENYTRCVSTVDLACFVSNLEILGFHEACSEHHLFRGQGIVGTAFTTNKPCFATDITAFSKT  
EYPLSHHARMFGLRAAVAIPRSVYTSSSDFVLEFFLPKDCQDPPEEQKQMLNSLSIVIQQACRSLHVVEKELEEE  
QIMLPNGDPAIVASSEGLKLGTPPTATTTNTTTCVPGDQSSGKESSWVAHMMEAQQQGRGVSVDYLTEE  
PKEEFRVTTHWDNLNHGDLNQGQVFSDFGQLQQCSGNSGSIIEGGIDSYSGRRSSGARKAGEKRRTKTEKTI  
SLPVLQRQYFAGSLKDAKSIGVCPTTLKRICRQHGITRWPSRKIKKVGHSRLKLQLVIDSVQGAEGAIQIGSFYSSF  
PQLNSPKFQGNSNDSFSSISPSDHHHHHHHLNNQSNSQPESGFFIHGSAMKSSPSMSSQASGLQQSTTTFSCF  
NGDPLITEDPSVILKRACSSDEELFASNQDKANLLSRQSYKALSDQNRILDQTLPLPDNNERINLTDGFAFRVK  
ANFGEKKIRFSLPPKCSFRDLQLEIMRRFALDDITMIDIKYLDDREWVLLTCNADLQECLEIHRQSQNRMTMRICL  
QQAPSDQLIEESPFSSSSPC

>Parasponia\_andersonii\_PanWU01x14\_175040.1

MVAKDENPFPDQFLSSPLNFGDGYQFSTNFEQNWQNELPIQESILLDAVPLMEYYPTDPLYSTVELEPSPSI  
IQDDILINNGNGLEVWDDIGVLGFEANYNQKKPLLLCNDPSNINGDDQKGKEKMKKEKKIVERRLACRISSE  
KSSTSASKTLRQVLSQYYMPITQAAKELNVGLTLLKKRCRELGIRRWPHRKLMSLTKLIKNVQDLGKEEGGHQ  
ENDSKLKNAIELLEREKKLVEEVPDIQLDDTTKRLRQACFKANYKKRKLIMDSDDHQSGLNTKYLEEEDEEIKS  
LLSDFSSSTNHLF

>Parasponia\_andersonii\_PanWU01x14\_226510.1

MDSSKTHFLLSLLIFKNTINRELIRSLHVYRLINGMEKEVEREFVFSVNGAYVEMEADPLLRLQKFEISEVFEGFVN  
GLWLCIFAFYAHHPPLLTICIPSLTLSRNPKLRAIPSLANDLETIFHMICVADDKEPSRVLSSERTCQRNNQNH  
QLRRNVPLVDQDLNCLPYPVTPSELSDDQQIEQSSSGTMEKKKKRATSKDIARIALSDLAKYFDLPIVEASRNLEV  
GLTVLKKKCREFGIPRWPHRRIKSLDSLIRDLOQEREWQQQDNKAAIAVAKRQSMLENERESIEKKPFLEMKTE  
TKRFRQDVFKRKHRRARVLGTQSLFLPDN

>Parasponia\_andersonii\_PanWU01x14\_262620.1

MSESEETTPSFPPKSTSSKEVVPDVREVLMDFDLDDNPWPIMDQIAFVSNSMSPLLFSPTDQPCSPLWAF  
DAENNDNNNNNSNNSDKLGRVSSAIADSSCFSCNSNSVAERPVGNEERKIAPSPFLGLVPVDNPNGYLIKE  
RMTQALRYLKDSTDQHVLTIWAPVKNGCRYVLTSGQPFVLDPSNGLHQYRMASLLYMFSVDGETNEVLG  
LPGRVFRQKLPEWTPNVQYYSIREYPRLDYAQHYNVRGSLALPVFEPGQSCVGVLELIMTSEKINYAPEVDKVC  
KALAGSKLEKCRYIRSYNHEICNEGRKNALTEILEITAACETHKLPMATWVPCMHNRNLAYGGGLKKSCTSID  
GSCMGQVCMSATELAFYIIDAHMWGFREACLEHHLQKGQGVAGRAFYSRNLFCFGDITQFCKTEYPLVHYAR  
MFGLTSCFAVCLQSSHTGNDNYVLEFFLPPSIANASEQSALLGSLATMKKHFQSLKVASGIGLEEIGIVLVKVS  
AIGGLESSLECIQITKSAESPPGPIALPNGGDMVQQDLLKQQLTVDLDTANVGEDAAHDGGSVNVHVSSENKET  
KKISERKRGKTEKSISLEVLQQYFAGSLKDAKSLGVCPTTMKRICRQHGISRWPSRKINKVNRSLSKLRVIESVQ  
GAEGAFLTPLATSPPLVAVASISRPSTSNGTNHQHSPSNIPSEPPMERKDSPTTSSPRRQVETEDQLQGGGIL  
SQKEFIHENGFFSPEINRGSNHSKSGSGSREASVGTPTSHGSCQGSPANGSIIVKDQFVYSIHEQCIKVEGSPES  
APQPTDELHFSVPDALVTAECQEPFGGMLIEDAGSSKDLRNLCPAVDAVLDEPVPEYCWINSACSDLAPKQTS  
ITQTQPNVIVRLRQEMKSVTIKATYREDIIRFRISLSCSVVELKDEVAKRLKLELGTFDIKYMDDDQEWVLIACDAD  
LQECMDVCRSSGSIMIRLLIHDIMPNLGSSCESTEE

>Parasponia\_andersonii\_PanWU01x14\_340330.1

MEHPFSSKEKENYWSSSRAQVENLASFDGVPRGMLPEDVFNFSSELLTFDAYAGWSNSPAVTDQVSATYGLS  
SLPSTTYVPMDGSNFAEQNVGALPVTEVGGNFNLPRSSFNYGDKIVFQPVNSEMGMDSTICRPTRYSLDER  
MLRALSFKESSGGGILAQVWVPVKHGDQLFLSTSEQPYLLDHMLAGYREVSRMYTFAAEGKPGCFPLGR  
VFISKIPEWTSVGYKKNEYVRVEHAYNHQVRGSLALPVFESDPGMPCCAVLEIVTTKEKPNFDTEMEIVCHA  
LQAVNLRNTPPPRLVHQCLSKNQKDALAEIIDILRAVCHAHRLPLALTWIPCCYGEAAGELAGVHVREGKTSSS  
EKCILCIEKSACYVNDSLMQGFAHVCVEHHLEEGQGLAGKALQSNLPFFFPDVKTYDISEYPLVHHARKFGLNAA  
VAIRLRSTYTGDCDYILEFFLPVNMKGASEQQLLLNNLSGTMQRICKSLRTVSDVEVGAIPSDAFQKGSVPNFMS  
LPGESSQMVLSDSLNPTDELPLKVSNNRRNEGIEADGVHEQAIRGSRRQTEKKRSTAEKNVSLNVLQQYFSGSL  
KDAAKSIGVCPTTLKRICRQHGISRWPSRKINKVNRSLRKIQTVLDSVQGVGGLKFDPTTGGLVAAGSIAQELD  
AKKSLFFIEKTSSLQNSDPMSAVKLEEDCCTGGVDPNSGEIRKPNIVSLTNSTKDSKIAIEAGSRPICDARSGALS  
DKACLSYHAKGKTSCQSKCSSKFENSKYYHVSQSSGSLGVCEMDTAGDGDELIEHNLPASSSMTDSSNG  
CGSMLHVSSSSHSQSFEERKHPKGKMSCGDSGSKIIVKATYREDTVRFKFDTSGAGCSQLYEEVAKRFKLQGTG  
QLKYLDDEEEWVMLVSDMDLQECLEILDDIGTQSVKFQVRDMPCAVGSSGSSNCFLAGGS

>Parasponia\_andersonii\_PanWU01x14\_370700.1

MEDGVLSPATILGAPADYPMDLDFMDELFLGECWLETRDGSEFLNQNPSSNPLFDPLFWPTLEPDGESNAN  
PSPKSNQEERHRSFLVESQGKSLHTLPPTTRATTDVVKYSGVSEAHITEGSSSELSRRWWIGPKANPGPSSSVME  
RLWRALMYIKDVIRDKDILVQIWVPVHKEGRRVLTRDLFPALDDSGSKLARYRDISVKYQFSAEDSKDLVLGLP  
GRVFSGKVPEWTPDVRFFRNDYPRLIHAQQIDVRGTLALPIFELDSRTCLGVVEIVMTTQIKIKYRPELESVCKAL  
EAVDLKSSEVLSTQNVYNEYQAAPQVLRSAQDTHRLPLAQWVPCYQKGEGCRHSDENYQCVSTVD  
HACYALDPQVQSFHEACSEHHLFRGQGVVGLAFMTNQPCFSADITSYTKTEYPLSHHARMFRLQAAVAIRLR  
HASAADFVLEFFLPVDCKDPDEQKKMLTSLSLIIQQCCQSLRVITDKLEEEESCSRVDVVVPSNLRPARNTCFTE  
APQNDTDLSLFPEEKKPREISDGRSLKSLSDNQRDSSLPKPSVEECSTVGEFSFSSVGVGKTGERRRAKAEK  
TITLQVLRQYFAGSLKDAAKSIGVCSTTLKRICRQHGIKRWPSRKIKKVGHSLLQKLQLVIDSVQGASGAFQIDSFYTNF

PELASPNVSGTSPFSTSKLNDHPLPSNMQPGDGGIFSVQAATAAATSKSSSSCSQSSSSSHCCSSRSQLHPQTW  
NNVTSSDDLIAGENSGGGDDVVLKRVSEAGLNACSEDDRKLLPRSQSHKSLMKHHKTDKWFPSSAKNNNN  
GARIPQQQGEFQRVKVTYGEDKTRFRMQNNWGFIDLQQEVGRRFGIQEMVKFTLKYLDDESEWVLLTCDAD  
LEECFEVYRSSQNATIKLSLQPSRHLRGCLRGNDPL

>Phaseolus\_vulgaris\_Phvil.003G189900.1.p

MESHPLMGWSSYYQIDEKSPFTCQFSYSEISGVYPPLHDLAIQEYHHDVPLMEYPSDPLYETLAIETPSLRA  
DYDFYDINKGLSVWNEVDAVFDTEVGFLFRKNEERGGGLEEMMENKQGREERTNSSSSRMLSRKTISQYFYM  
PITQAARELNVLGLTLKKRCRELGIIRWPHRKLMSLQTLINNVQELLKEEGPESEEKLYAIETLESEKKLLEMPD  
IELEDNTKRLRQACFKANYKKRKLGRQEPQCSSWSACASHFSTYIP

>Phaseolus\_vulgaris\_Phvil.009G080800.1.p

MDNNWNNSSDLFDNSPLISNYIEPDALVYIFNDQPNVLPQQRNAEQNDPFVVEQDHVSFTGLTIEDVSTHSD  
NDITTGGVSKLDQGGWSMRKRKFSFMDSMIEDHPMHDKDNFPNGENMSAHINLNQLRVWPPAPFDIDIDT  
SFDPFLHNLIDRDISIFDLSNDELVSPSLQQNALPQHQQQVPQNALSKQQNALPQLLHTLPQSQNQVYQFGVEQI  
HVPILNPTFQEQSLHVNCNFTTGGEVFNIDVGNQSMAEHPLL RHGILNEEDVIAIDHWPSKKLLSCCCQILR  
QIIHTDGKFKEKLEIHGSLGVIGHAIFHIQDMTPGGEPREIYQ MIDLCGKSIEQIRSFLAAYCKDQTRLGLVTLDD  
PLSSYYDTICTGLDWVEHYNDGDDDLSPNSTEPESDSEPEPEPEPEPETIPESDPVPEPHNGEASTTKPKPK  
RNMVAQRKRVPKMTMNDLSPFFHLTIRDAADKLDVSDSVVKKISRLGNLKRWPQRKLQSLAKDVRVLRKALN  
SPYEGTSKRVRQEIQRLQREMVAVCGGVAPTGIEMQLQLEE

>Phaseolus\_vulgaris\_Phvil.009G115800.1.p

MEYGALVQNGACGSFSDIFAPETDFMDELFAEGCWVETRVGCGGSYLNCGTEPSKSNSCMEIIFEESEAESLM  
VGKRWVWIGPRANNPGPSSSVKERLVAVGYLKEYAKNSNMVIQVWVPARRGCAVGIHQDSYTTLDYTNITNN  
NNGDATRVFQFQEEWLSHWPNIIRFLRTHDYSRVQQYDLRAGSLSLPVFQRGSGICLGVVEILLPNVNPDL  
HNLQGVDFRSYSLQNFIIPAMTVKGFDELYQGALNEIVEVLTCVCKAHELPLALTWAPCIQQGKSGCGHSNEEN  
YVSTVDPASFVADVVLGFLDACSEYHLLGGQGVVGTAFTTAKPCFANDITAFTKA EYPLAHYANMFGHLAAVA  
IPLRSVSADVFLEFFLPKCHDTQDQKQMLNSLSMLVQQACRSLHVVM DKEEEELVVHHHHHPHDSKEMES  
SSWIAHMMEAQQKGKGVSVSLEYLQEPKQFEKVTTCNSEQVFSELEGTGSGVGVGGRRGRKSGDKRRTKA  
EKTISLPVLRQYFAGSLKDAAKSIGVCPTTLKRICRQHGITRWPSRKIKKVGHSLRKLQLVIDSVQGAEGSIQISFY  
TSFPELSSANGVSESTKINNDNSKFYSENGLLSNQGVTTTTSTSPFKSPTSSCSQTCNPTSINQSTAIINNND  
DIILMSENQSLIGAPIQVQGEARHFTTHPPIPISIQSLDALPPLPQTNSVWNTGSGSFRVKATFGDEKIRFSLQP  
NWGFRDLQMEIARRFNLNEISNSQLKYLDDAQEWVLLTCDADLEECKDINRSSQSRTVRLFLFHASPLSHSTNA  
FGGTSPT

>Phaseolus\_vulgaris\_Phvil.009G186900.1.p

MNCYYPHDILFETFPLEPAPLSFHDYDFSDVKNVLSAWKEVDCSDHKPAFSSSNDGESVNAMREEMKKGKHRRE  
ERISNSARMLSRKTVSQYFYMPISQAAKELNVLGLTHLKKRCRELGIQRWPHRKLMSLQTLIRNMQEQGGGEGP  
QNDEKIRTAIEMLEKEKSLVEERPDELEDKTRRLRQACFKANYKKRKLGMGRFMEPQSSLDGLSDKY

>Phaseolus\_vulgaris\_Phvil.009G051600.1.p

MDFVSEDFPNLEIIPHTFNSCFFSAQLYPTDKTMEVSLSPLEGFSHDHWTQQLSYSSKQLSLNEFPDLENLDIDF  
SLPPLGEDLEEVDQKPLNIIVPENGRCSREKGFGDALLAIESGSAICVKKEEVQNI EQMLVPRARGSGSGSSGS  
KKKKPCALEFEEIKKHFDVPINEAAKQMNVLGTLMLKRRCRELNIMRWPHRKLKSLQLLIDNVKELGLAEVSM  
EKHKRLEKLPGLAISAKAKLRQACFKANYKRRRYMGMMAVQA

>Phaseolus\_vulgaris\_Phvil.009G011200.1.p

MMRDGDTVSSSATMMEASPPDGTTSMDFDYMGELFYDGCWFEASVDGSDFLQSPSYNPLFDPSFSWP  
ALETNHNESQGAAGFTQEEGHNNNVVAARGGGGGGQQFQPETISIEGASDGVRRWRFAPTSPAPGPSIME  
KLVRALMRIKDYNRNKNMLIQIWWVPVHRGGRPILAANDILFSLDSRSMNLAKYREISVRYEFSAE EGEVKELVPA

EEGDSKELVLGLPGRVFRDKVPEWTPDVRFFRSDEYPRLDHAQEYDVSGSLAVPIFEQSGSKMCLGVIEVVMTT  
QQINYGPELESVCKALEAVDLRSSKQLSIQNVKACNRSYEAVLPEIQQVLRSACEMHKLPLAQTWIPCVQQGKE  
GCRHSEDNYLFCISPAEHACYVGDPKIRSFHESCTEHHLLKGEGVAGGAFMTNQPCFSDDITSLSKKDYP LSHHA  
RLFGLRAAVAIRLSIYNSTDDFVLEFFLPVDCNDSEEQRKMLTSLSIHQVCRSLRVISDKELVEAKLSIDEGISLAD  
SGFDRTAICEELQHKGTVASLDTEEKLETTGRKFSDPMRQQKSPILKGNLDCVRESSTSVENLSSVGM SKMG  
DRRRAKAECTITLQVLRQYFAGSLKDAAKNIGVCTTTLKRICRQHGIKRWPSRKIKKVGHSLQKLQLVIDSVQGA  
SGAFQIDSFYSNFPDLASPNLSGTTLFSTFNQTDNPNSISTQPDGALSPEGTSKSPSSSCGQSSISSHSYSSMSEL  
QQLHTTNIAGKKDSTTAGEDSAVVALKRIRSEAEKSLNQDKAKLLPRSLSQETLGEHPKNQYQRPLLKTSKVD  
AHRVKVTYGD EKTFRMPKNWGYEDLLQEIGGRFNVSDMKKFDVKYLDDDCEWVLLTCDADLEECIDVCQSS  
ESGTIKLSLQTSTHSMRSSLFR

>Phaseolus\_vulgaris\_Phvul.005G155100.1.p

MEYPFSSKGREIGDWQSSGTQLVGSTLDARMSNSISEDMSNSFSELM SFDTYAGLCNPSISDQILANELPSFA  
SLSYSLPDGFNIVQQNNGQCYMSEVGRNNNDMESSPIYGEKVACQQMDTLLGFLSDANEANNLNSKLKVN  
SPQHLNNSVAGNYIMSRPPALSLDERMLRALSFFKESAGGILAQVWVPIKDGDLILSTSEQPYLLDQMLAGY  
REVSRTFTFSAEGKSDCFLGLPGRVFTSKVHEWTSNVGYYSMNEYLRFEHAVNHHVRGSIAPFIDVHSELSCCA  
VLEIVTTKEKPDFSREFEIVCRALQLVNLRTVKPLRCLPQCLSNNKKATLTEIVDLRSVCHAHRLPLALTWLPCCY  
TEGSRGEATRIIKGGHSTNSGKSILCIEESACYITDRALEGFVRACTEHPLEEGKGIAGKALRSNHPFFCPDVKTYD  
VSEYPLVHHARKYNLNAAVAIRLRSTYTNDDYILEFFLPVNMKGGSEQQLLDNLSGTMQRICSSLRTVSDIELS  
RIESSQEGFGKNAPCFSPSSRNSEVPLENGDCHSVPMMSLKATNARDNEIEPSTHQGRNGTKRQVQKNRST  
SEKSVLSVLQQYFSGSLKDAAKNIGVCPPTTLKRICRQHGISRWPSRKINKVNRSLLKKIQTVLDSVQGVGGLKFD  
PSMGAFVAGGSTIQUETDAHKSLLFPEKSIVKDATPITQKSVSVPPAPCSEVENFAFKLDEKLKKTNAFSVGCEDS  
KSM AIDGSCMERLCIKVQDCPEQACLGSVFPKEQDKWILNKSGLGVENFKSSIRGQSSNSLFGNQMHIGVD  
GDAGVIEPNHPSSSLTDSSNGSGSMHSSISGSQSFKNQNSNVKSTIVDSGSKLVKAIYREDTIRFKFDRSA  
GCFSLYEEVAARFKLQTSFQLKYLDDEEEWVMLVNDADLQECLEILDDIGTCNVRFLVRDLPLILSSSGSSNCYL  
GGSS

>Phaseolus\_vulgaris\_Phvul.011G052100.1.p

MEDHFCPKGNETGYCTSPGAQLEESTVDGGMKKSASEDMFSNFSELMNFDTYAGWNNSSCMTYQSLANVF  
SSFSSASYPPSEGLNLVEHGNPCFMTEVSEIHSGMESSPSCEERGIFQQMDIQLGLFDEANDSNSFDSKQNRN  
GTYQQLNTSDMCNYLISRSSGRPLDDRILRALSFFMESVDGEMLAQVWVPIKHGDEFILSTSEQPYLLDPKLAG  
YREVSRAFTFSAEGKKGSCPLPARVFISHVPEWTSNVGYYNKTEYLRLDHALNHEIRGSIALPISDLHSLVPCAVL  
ELVTTKEKPNFDREIVTHALQLVNLKTITPPRLLPQSLSSNKRAALTEILDVLRVCHAHRLPLALTWIPCSYSEG  
LGDESERIQIKEGHTSSNEKCVLCIEESACYINDGALGGFVHACVEHHLEEGQGIAGKALQSNHPFFYTDVKTYDI  
GEYPLVHHARKYNLNAAVAIRLRSTYTNDDYILEFFLPVTMTGSSEQQLLDNLSGTMRRICRSLRTVSDAELTG  
IEGSVAEFPKEKATYFFPMSKRNSQIAFINDDHDSVQKMSLKASNNGIEAVHSQVVNGSRKQIEKKRSTVEKNV  
SLSVLQQYFSGSLKDAAKSIGVCPPTTLKRICRQHGISRWPSRKINKVNRSLLKKIQTVLDSVQGVGGLKFDPTG  
GLIAGGSIMQEIDTHKYILFPEKSAVKDPKHATQKPVSVVPAGGSTSENSTIKLDNDDGVCLVGNKLVHSRVLIS  
DTSEGGLKKNASSDDCCEDSKSVAMNDGSSQKGSKRANKQDCPDQTCISLVTDEVEVGVDGGEGIDEHNNH  
LNSSSTTHSSNGSGSMHSGSSRSQS FENQKHSKVKSTCVHSGSKMIVKASYRGDTIRFKFDPSAGCFQLYDE  
VATRFKLQNGSFQLKYLDDEEEWVMLVNDSDLQECIEILDDIGTRCVKFLVRDVPCVLSSRGSNNCFLSDSS

>Phaseolus\_vulgaris\_Phvul.008G291800.1.p

MEYGGGFGSLWECSAWEEDSIEEVLVEGCWVEASGVGSCEGEYMGSSAEEMEMEVMRKRWVWIGPEANS  
SVKERLVAVGYIRECTKNSNVVIQVWVPLRSLVGGPGNNLRNHPDEWVSVEMNMNMNMNMNSARD  
VSLRFYRSHEYPRVPPYVDVPGSLALPVLERGHTCLGVILILMPPCDTINYCPQLNNSLLCNSSSFQVFEEVYEA  
AVNEMA EVMKVCRAQNVALALTWAPCCIQQGGKCGYGHSTETHFSTVERACFVGEAQLPFKEACSQHLL

RGQGIVGTAFTTSKPCFAVDIAAFSRAQYPLAHHANIFGLHAAVAIPLRTLYADVFVEFFLPKDCHDREHQNHFL  
NSISLLLQQSCRNLHVVMGDEFTLPPPPPPPPPPQQYLSNKEEMVVSEKLESQWQAEACGSWIAHMMEAQ  
AQEQKGKGVCSLEYLEEAKKEFKVTGKCRWESGGGAYEAADLHEQQVFGDESQTQTQSFGGRRGRKSGEK  
RRTKAECTISLPVLRQYFAGSLKDAAKSIGVCPTTLKRICRQHGITRWPSRKIKKVGHSLKKLQLVIDSVQGAEGAI  
KIGSFYNSFPELSSATSHSSIPNNSSSFYGHSPSSSSPSTAPPQHQHFSQTSCTAAPLRVKASFGDEKIRFSLQPK  
WGFRELEVEIGRRFNVKDLGKVVVKYLDDEGEWVVLACDGDLEECKDLHTTYESRTIRLALFQPSSSP

>Phaseolus\_vulgaris\_Phvul.004G114100.1.p

MSESEKENPDLLPKSKQQEEHGFAMDFDIGFESLWSLDHISLVSNPMSPFLLSTISEQPFSPWAFDVEDERQIRI  
ATAGNTKAATENPVESYENKKTVSPPFVAVPPSENPDGYCLIKERMTQALRHFKELTEQNVLAQVWAPVRNGN  
RYALTTSQQPFVLDPHSNGLYQYRTASLMYMFSDGENDEILGLPGRVFQHRIPEWTPNVQYSSKEYQRLNH  
AQHYNVRGTLALPVFEPAGQSCVAVLELIMTSPKINYAPEVDKICKALEAVNLRSEILEHPYNQICNEDRQYALA  
EILEILTVCETHSLPLAQTWVPCEHRSVLAHGGGHKKSCSSFDGCCMGQVCMSTDVAFVIEAHTWGFHEA  
CVEHHLQQGQGVAGRAFLSHNMCFCGNITQFCKTEYPLVHYALMFGLTSSFAVCLQSSHTGNDEYVLEFFLPPR  
ITDFNEQKRLGSLATMKPHFQSLKIAAGVELEQNCSIEIIEARKEGVQLRFESIPITQSSKSPPRHASPNMGERLP  
PAPSEQQIMVDFDDINDGKNLGD TAGGHIDQNTSLEARTKKKPSERKRGAEKISLQHYFTGSLKDAAKS  
LGVCPTTMKRICRQHGISRWPSRKIKKVNRSLSKLKCVIESVHGAEGAFLNSLSTGSFPSTSNKFNQTSLTIRPS  
EPKINENDFDASRASESNRQAGVEDHFLSTRTQNPEKVINEKVVAIQETGTGTGTRFRTGSGSSEESANPSPRGS  
CQGSPNEMSPPKDIFVTGISEQCHVLRGSLGSTYSTSTPNRATAYMPNMFVEITEPQEPFGQLLEGVGGSSK  
DLRNLCPADAVLEDQVHEHWRMNHQCSELTVPQHMDTLNNNNNNMTPFAVRKEVKSVTIKATYREDIIRFK  
ISLNC AIVELKEEIDKRLKLEEGTFDIKYLDDHEWVLIACDADLQECMDISRSSGSNMIRLVVHDILPILGSSCESS  
GDWKGC

>Phaseolus\_vulgaris\_Phvul.007G071900.1.p

MSESEENTDYVTRSKPAEEAGCTMDFDLDLETSWPLDHMAFVSNPMSPFLFSSSTS DQPYSPWAFSDGEDL  
KLPAFAFSDCHKIFPCDSNSIAEKPEENDDNKKPLPLAPMPPVENVGGYCVIKERMTQALRYFKELTELNVLAQ  
VWAPVRNGNRYVLTTSQQPFVLDPHSNGLH QYRTVSLMYMFDVDGENDGSLGLPGRVFQQKLPEWTPNVL  
YYSSKEYPRRDHAQHYNVRGSLALPVFEPALQSCVGVLELIMTSQKINYAPEVDKICKALETVNLRSEILDHPYT  
QICNEGRQNALSEILEILTVCETHNLPLAQTWIPCKHRIVLAQGGGVKKSCSSFDGSCMGKVCMSSTTDIAFYII  
DAHLWGFREACLEHHLQQSQGVAGRAFLSQSMCFCSNITQFCKTDYPLVHYALMFGLTSCFAICLRSSHTGTDD  
YVLEFFLPPRVTD FHEQKALLASILATMKQHFQSLKVASGVELEDGSIEIEATIERIHRHESIPIAPSRSPRPDTS  
PNMEEEVPRDPSEQQHILMYCNGTNHGANLRDKAGGNIDHMTTLETKNKKPLERKRKTEKSISLEVLQRYF  
AGSLKDAAKSLGVCPTTMKRICRQHGISRWPSRKINKVNRSLSKLKRVIESVQGAEGAFLNSLSTSPLPIAVGSL  
PEPSTPNKFSQQVSMGIRPSEPQMKVNELNASKELETNRQAGMEDQLIGGRIRNFERVSNKGGSTQEVGRE  
PKRTRTSGSSEDSTNPTSHSSWHDSPNNESSPVKDIFITSNHDQCAVLRSSPGSTLQPATDTPNHPTSYPMPPE  
FVSAELQEPFGGMILEDAGSSKD LRLNLCPSVAEAILEDLVPEACGTNPPALDLSPKQSMGTPNKVVT PFAATKE  
MKTVTIKATYREDIIRFVSLACGIVELKEEVAKRLKLEVGTFDIKYLDDHEWVLIACDADLQECMDVSRSSGSN  
IIRVLVHDITSNLGSSCESSGE

>Phaseolus\_vulgaris\_Phvul.002G116000.1.p

MDFSQNTKTTLLTNLLVFNNTVQPELMRSLHVYRQGDGEERTVEREFVSDCGSYVEMQATPVLRVLKSHVSE  
VCEGYKNGVWLCILAFHADNTPQFCRIPLLLASRNPKLQMIPNLLRDLHMIYKLD RKEEDRHTTLGSTGEECQ  
GNSNNFQPSKVFVLDQDLNLYPYEEDSELNDNETDVESPGLP GKRRAPSDLVAKISLSDLVQYFGMPIVE  
ASRN LKVGTLVLRKCREFGIPRWPHRKIKSLDSLIQDLQEEAQNQELENMEAMAVAKRQKMLESEKENIEKK  
PFMDIQSETKRFRQDVFKRRHRARAVGKQNPTVSNT

>Trema\_tomentosa\_TorRG33x02\_007750.1

MEHPFSSKEKENEYWSSSRAQVENLASFDGVP RGM LSEDVFNFSSELLTFDAYAGWSNSPAVTDQVSATYGLS

SLPSTTYVPMDGSNFVEHNVGALPVTEVGGNFNLPRSSFNYGDKIVFQPVDTQFEVSAQSNNANNNSIAKHNN  
GSFQENSEMGLVDSTICRPTRYSLDEKMLRALSFKESSGGGILAQVWVPVKRGDQLFLSTSEQPYLLDHMLA  
GYREVSRYMYTFATEGKPGCFPLPGRVFIKVPWEVTSVGYKKNEYVRVEHAYNHQVRGSLALPVFEPDPGV  
SCCAVLEIVTTKEKSNFDTMEIVFHALQAVNLRNPPRLVPQCLSKNQKDALAEIIDVLRVCHAHRLPLALT  
WIPCCYNEGAASELAGLHVREGKTSSEKYILCVEKSACYVNDSLMQGFAHACVEHHLEEGQGLAGKALQSNL  
PFFFPDVKTYDISEYPLVHHARKFGLNAAVAIRLRSTYTGDCDYILEFFLPVNMKGASEQQLLLNLSGTMQRICK  
CLRTVSDAEVGAISSDAFQEGSVPNFMSLPGESSQMVLSDSLNDLDELPLKVSNNRRNEGIEADGVHEQAIRGS  
RRQTEKKRNTAEKNVSLNVLQQYFSGSLKDAAKSIGVCPPTTLKRICRQHGISRWPSRKINKVNRSLRKIQTVLDS  
VQGVVEGLKFDPTTGGLVAAGSIAQELDTKKSFFIEKTSNLQNSDPLSAVKLEEDCCTGGVDPNSGEIRKPNIV  
ASTNSTKDSKIAIEAGSRLPICDARSGAFSDKACLSYHSKEGKTSSQSKCSSKFENSKYYHVSQSSGSLGVGDEM  
DTAGDGDDELIEHNLPASSMTDSSNGCGSMLHVSSSSLSQSFEERKHPKGMSSGDNGSKIIVKATYREDTV  
RFKFDTSTGCSQLYEEVAKRFLQTGTFLKYLDDEEWVMLVSDMDLQECLEILDDIGTQSVKFQVRDMPCA  
VGSSGSSNCFLAGGS

>Trema\_tomentosa\_TorRG33x02\_035230.1

MEDGVLSPATILGAPADYPMDLDFMDELFLGECWLETRDGSEFLNQNPSSSPLFDPLFWPTLEPNGESNANP  
SPKSNQEERHRSLFIESQGKSPLHTLPPWATTDVVKYSGVSEAHITEGSSSELSRRWWIGPKANPGSSSVMER  
LWRALMYIKDVIRDKDILVQIWWVPVHEEGRRVLTTRDLPFALDDNSSKLARYRDISVKYQFSAEEDSKELVLGLPG  
RVFSGKVPWEWTPDVRFFRNDDEYPRLIHAQQNDVRGTLALPIFELDSRTCLGVVEIVMTTQKIKYRPELESVCKAL  
EAVDLKSSEVLSTQNVFNKYYQAAIPEIQQVLRSAACDTHRLPLAQTWVPCIYQGKEGCRHSDENYGCVSTVD  
HACYALDPQVQSFHEACSEHHLFRGQGVVGLAFMTNQPCFSADITSYTKTEYPLSHHARMFRLQAAVAIRLRSI  
HTGAADFVLEFFLPVDCKDPEEQKKMLTSLSLIIQQCCQLRVITDKELEESGSRVDEVVPSNPRPARNTCFTE  
APQNDTDLSLFPEEKKPREISDGRSLKLSDNQRDSILKPSVDCVEECSTVGEGSFSSVGVGKTGERRRTKAECTIT  
LQVLRQYFAGSLKDAAKSIGVCSTTLKRICRQHGIKRWPSRKIKKVGHSLLQKLQLVIDSVQGASGAFQIDSFYTNF  
PELASPNVSGTSPFSTSKPNDHPMPSNMQPGDGGIFSVQAATAAATSKSSSSCSQSSSSSHCCSSRSQHPQT  
WNNVTSSDDLIAGESSGGGDDVVLKRVSEAGLNACSEDGRKLLPRSQSHKSLMEHHKTEKWFPPSSAKNNN  
NGARIPQQQGEFQKVKVTYGEDRTRFRMQNNWGFIDLQQEVGRRFGIQDMVKFTLKYLDDESEWVLLTCD  
ADLEECFEVYRSSQNATIKLSLQPSRHLRGCLRGNDPL

>Trema\_tomentosa\_TorRG33x02\_082070.1

MADPGAISYYDLYDGPFSENLSNILTNYENPSLLDLPEPDHIGGQGPSNTSDNHNPDHVTLEQNSATNWDLP  
IDFNVDQCLGSGPNNQPGPSRIRDHQETNNNDPDDQVIEENLEFPQVNNNSNIGGNSRTLPWSPPPVPFNC  
TCCQVLREIIHVNEFNMYMKLEIHGRLGMICHAIWESRNTNNNVTTSTSSGNDPRFEMFDFCRQSIEDVKRFL  
VEYCSRRKVEGYVMLHDLPLSIFYEALCVGLEWDELSNNDFFVPTSPPHNSGGAEENYTEQQGQEEQVTHQ  
QEQTVETRLETTQNDVERNSRISLAEQRQRTGKLTMLDREYLHLTIEDAAKAMNVCPTVLKKICRRHNLPRWP  
YRKIRSIKRQISSLRPNLESNDAAREQAQAEIDRLRQEATNICAGVDVVGL

>Trema\_tomentosa\_TorRG33x02\_105690.1

MVAKDENPFPDPSTQFLSSPPNFSGDGYQFSTNFEQNWQNELPIQESILLDAVPLMEYYPTDPLYSTVELEPLPS  
IIQDDILSNNGNGLEVWDDIGVLGFANYNQKKPSLLLCNDPNSNINGDDQKGKEKMKREKKIVKRRLSKRISSE  
KSSTSASKTLRQVLSQYYMPITQAAKELNVGLTLKKRCRELGIWWPHRKLMSLQTLIKNVQDLGKEEGDHQ  
ENDSKLKNAIELLEREKKLVEEVPIQLDDTTKRLRQACFKANYKKRKLIMDSHYHHSGLNTKYLEEEDEEIKS  
LLSDSFSSTNHLF

>Trema\_tomentosa\_TorRG33x02\_114670.1

MSESEETTPSPFPKSSSSKEVVPDVREGLMDFDLDPNPWPMMDQIAFVSNPITGNSNSVAERPAENEERK  
IVPSPFLGLVPVDPNPNGYLIKERMATQALRYLKDSTDQHVLAQIWAPVKNGCRYVLTSSGQPFVLPDPSNGLH  
QYRMASLMYMFSDGETNEVLGLPGRVFRQKLPEWTPNVQYYSIREYPRLDYAQHYNVRGSLALPVFEPSGQ

SCVGAVNLRSDILDHTSTQICNEGRQNALTEILEILTAACETYKLPMACQWVPCMHNRNVLAYGGGMKKNCTSI  
DGSCMGQVCMSTTELAFYIIDAHMWGFREACLEHHLQKGQGVAGRAFYSRNLFCGDDITQFCKTEYPLVHYA  
RMFGLTSCFAVCLQSSHTGNDNYVLEFFLPSPITNASEQSALLGSLATMKKHFQSLKVASGIGLEEGLVVKVS  
AIGGLESLCQIPKSAESPPGPIALPNGGDMVQDQLTQQLIVDLDTANVGQDAAHDGGSVNHVSVSENKET  
KKTSEKRGKTEKSISLEVLQYFAGSLKDAKSLGVCPTTMKRICRQHGISRWPSRKINKVNRSLSKLRVIESV  
QGAEGAFGLTPLATSPLPVAVASISRPSTSNGTNHQHSPSNIPSEPPMERKDSPTTSSPRREGQVETEDQLQGG  
GVLSQKEFIHENGFFSPEINRGSNHSKSGSGSGEASVGTPTSHGSCQGSPANGSVIVKDPFVYSIHEQCIKVEG  
SPESAPQPTDELHFSVPDALVTAECQEPFGGMLIEDAGSSKDLRNLCPAADAVIDEPVPEYCWINSTCSDLPK  
QTSGVITQTQPNVIVRLRQEMKNVTIKATYREDIIRFRISLSSNIVELKDEVAKRKLKLELGTFDIKYMDDDQEWVLI  
ACDADLQECMDVCRSSGSNMIRLLIHDIMPNLGSSCESTEE

>Trema\_tomentosa\_TorRG33x02\_215090.1

MDSSKTHLLLSLLIFKNTINRELIRSLHVYRLINGKEKEVEREFVFSANRAYVEMEADPLLILQKFEVSEVFEGFVN  
GSWLCIFAFYAHRRPPPLLTCPISLLTSRNPKLRAIPSLANDLETIFHMICVTDDKEPSRVLSERTCQRNNQNHRO  
LRRNVPVLDQDLNCLPYPVTPSELSDDQIEQSSSGTMEKKKKRATSKDIARIALSDLAKYFDLPIVEASRNLKVG  
LTVLKKKCREFGIPRWPHRRIKSLDSLIRDLQEEREWQQQDNKAAAMAVAKRQRMLENERESIEKKPFWEMK  
TETKRFRQDVFKRKHARVLGTQSLFLPDN

>Trema\_tomentosa\_TorRG33x02\_229930.1

MEYSAQLIVPKIENPLGFDWLFHENPSENLLPDFPPVQTFFEPNYPLPFSYLYDQLPSIDFQNFEDIDGGFFFDNA  
FSYCEDPMVDEKPKTNLVTFSHNNKNLTSQIGFEVSRLEIEIFGSSEKNEEETRSCGRRKKKVVELEDDIQKY  
FDVPIKEAAKGLRVGVTRLKKRCRELNIMRWPHRKLKSLKYLLNNVKKMGLNSNEIMMLEEQQRLLVAPDM  
DLTERAKKLRQACFKANYKSKRSLEAARA

>Trema\_tomentosa\_TorRG33x02\_237950.1

MPITLQAVDLRSSQNFSPPAVKVCELYQAALSEIVEVLVSCKIHRPLALTWAPCHQQGKGGCRHSDENYAR  
CVSTVDSACLVSDEILGFHEACSEHHLFRGQGIVGIAFTTNKPCFANNITAFSKTEYPLSHHARMFGLRAAIAIPL  
RIVYTGSSDFVLEFFLPKDCQDPEEQKQMLNSLSIVIQQACRSLHVVEKELEEEQFMLPVGDPDIVASSEGGLK  
RGTTTTTATTNTTTCVPGDQSSGKESSWVSHMMEAQQQGRGVSVSLDYLTEEPKEEFRTTHWDNLNHGDL  
SNGQVFSDFGQLQCSGSKGSMEGGIDSYFSGRRSSGARKAGEKRRTKTEKTISLPVLRQYFAGSLKDAAKSI  
GVCPTTLKRICRQHGITRWPSRKIKKVGHSLRKLQLVIDSVQGAEGAIQIGSFCSSFPQLNSQNSNDSFSSISPS  
DHHHHHHHHHLLNNQNSQSPESGFFIHGSAMKSSPSMSSQASGLQQSTTFSGFNGDPLITEDHSVILNRACSS  
DGELFASNQDEANLLRSQSYKALSDQNRILDQTLPLPDNNERINSRDGFAFRVKANFGEKKIRFSLPPNCSFR  
DLQLEIMRRFALDDITMIDIKYLDDREWVLLTCNADLQECLEIHR

>Trifolium\_pratense\_Tp57577\_TGAC\_v2\_mRNA3630

MSQQNQHGIFHNTNSDTFNSNSNAMLSQQNHQQGQGGNNDPFHYNLISPEDHHQQVQGDNNNNDS  
MFITNEMSQQNHGNNQSFSDPMVQEYQAQNSNNNSNNFSFGGNNFEVGGTSQMHEQQQLIQPSIQTP  
DLPNQNEVLAIQWPPTQVPFFCTCCQVLRHIIHANGFQFEKLEIHGRIGLITHAIHKLPTNGNTPNYQMIDFC  
KSSLDEIKYLAKYCVDRNTSGYFILQDPM SAFYETLCTGLDWIDDINMEGPMNNDQNSDDMGENATSDKK  
DLSAQRKKSASLTSLDRDYFHLPIEEASDHPNVKLCPTVLKTCRKAGLQRWPHRKKVSKLLKQIAIMGAQLDGQ  
DSATRARTEHEINRLKQEMIAHCGGYIPTAMHNIAAFLPQQQQ

>Trifolium\_pratense\_Tp57577\_TGAC\_v2\_mRNA39375

MGDGAAVTSSATMMEGPPQDENSMDFDYMSSELLLDGCWLEASADGSEFLLQSSPFSNPIFDPSFSWPSLENT  
EPPRNEDGHVGIEQESQIIVNAGSSDRQQCEFETRSGEVSRWLWIPPTPNPGPGGSFITEKLIRALKWIKDFNR  
NKDMLIQIWVVPVNRGDDRPILRANDLPFSLESRLNLAKYREISVRYQFSVEEEDSKELVAGLPGRVYRDKIPEW  
TPDVRFFRSEYPRVDHAQECDIHGTLAVPVFEQGSRTCLGVIEVMTTQQSNYGRELETVCKALEVVDLRSSG  
HSSLQNVKQACDKSYETALPEIQEVLRSACEMHKLPLAQTWISCIQQGKDGCRHSDDNYANCISPVEYACYVGD

SSVRRFFHEACMEHHLLKGQGVAGGAFMTNQPCFSADITSLSKTDYPLSHHARLFGLRAAVAIRLSIYSTSDDYV  
LEFFLPVDCNDSEEQKNMLTSLSMIIQRVCRSLRVITDKELDKDNLPSNEVMAVTDGRFATNAIWSESQHRRM  
AASLGGEELKSETMSRKFSQRRQQTTLTKGDLDGRASSPSVEGTFLLSSGINRTGEKRRAKAEKTTITLQVLRQ  
YFAGSLKDAAKNIGVCTTTLKRICRQHGIKRWPSRKIKKVGHSLQKLQLVIDSVQGASGSFQIDSFYSKFSDLSSP  
RTSLISTLNQIDNQVSLSTLPDPSLSPEGASKSPSSSCSQSSFSSHSCSSMSEQQHRKGNVAIGNKDPSVGEDSV  
DVVLKRIRSEAEKSLIQDNKTKLMPRSQSQETLGENPKTEHHKSFLKSAPKASQKEDSHRVKVTFGDEKTRFRL  
PKNWGYEDLVQEIARRFNVSEMSKFDIKYLD DDYEWVLLTCDADLEECIDVCQSSETSTIKLCLQPSSNFIRSSLEF  
R

>Trifolium\_pratense\_Tp57577\_TGAC\_v2\_mRNA6838

MEYPFYFKGRGIGYWQSPGTQLEESRSLDGGISNLGSEDMPSSFSELMNFDTYAGLCSGPSMTDQIMANELPS  
LASVLYQSPDEFNLVEQNTGQFYMTGVSGNYNNSESSPIFGEKIVRQQMDSLLDLLNNDANNLSSKQKIND  
SSQHVNTFDMDNCIISKPPDLSLDERMLKALSFFKESAGGGILAQVWVPIKHGGQVYLSTSEQPYLLDQMLAG  
YREVSRTFTFSTEGKPGFLPGLPGRVFISKVPEWTSNVGYSPSEYLRVEHARNHDVRGSIAPFIDLHSGLPCCA  
VLELVTTKEKLDLDFRELEIICRSLQLVNLRTTMPFRLLPECLTNNKRAALTEIVDLRSVCHAHRLPLALTWIPCFYN  
EGTRDETTRIQUIKEGNSSSREKNILCIEESACYITDRAMEGFVHACIEHPLEEGKGVAGKALQSNHPFFYSVDKTY  
DISEYPLVHHARKFNLA AVAIRLRSTYTNNDDYILEFFLPINMKGSSSEQQLLDNLSGTMQKICKSLRTVSGAEL  
SEMESSQEGFEKNSVSPFPSSKRKSPTPFINESHGSVKKLSSKASNLRNNGNEPSPNQERNAPKRRAEKYRSSS  
EKNVLSVLQQYFSGSLKDAAKSIGVCP TTLKRICRHGISRWPSRKINKVNRLKKIQTVLDSVEGVEGGLKFD  
SVGAFVAKGTAIQEIDENRSLPFPEKSTTEDSEPFSDAASVPLAHCS DGENSANKLDEKLKETNASLIDCSEDSK  
SFAMDDCPEQACFGSVLGKDQWVLNKGGLREECKHNTIGKRTSSFVYEMDTGVDGDDEAVENNNPAS  
SSLTGSSNSSGSI VHDSSSGYQNLKNQKQSKSIIVDSGSKIVVKATYGEDTIRFKFDPATGCLKLYEEVASRFKLR  
NGTFQLKYLDDEKEWVMLVNDSDLQECLEILNDMGRNARFLVRDTPCTFGSSGSSVCYLGSS

>Trifolium\_pratense\_Tp57577\_TGAC\_v2\_mRNA19272

MEYGGGLVGDGGVFGNMVGGGGGEAADMIEELLVDGCWIEASENNMMAMQSQTQTHYMSTNNNNNNNI  
PIGMGEGDHFNNHHHNQIECNVPTD HDDDQESGFVVGKRWVIGPRANPGPSTSVKERLVAVGYLKEYTK  
NSSNNVLIQIWWPALRRRSPLLIHNHYLHESSSAPVSVNPNTNVHVRFFRSHEYPRHQQQYGS LFALPVFER  
GSGTCLGVIEFVITNQTVVNYRPQLDHLSNALEAVDFRSSHNMNIPSAVKVFEELYEA AVNEIVEVLASVCKTHN  
LPLALTWAPCIQQQGGGVRGKGTAGAAGCGVSVAVPTDQMNNNQMMMNCVSTVDSACYVGDMEVLGFG  
EVCSEYHLFNGQGIVGTAFTTTKPCFAIDITAFSKAEYPLAHHANMFGLHA AVAIPLRSVYTGSAADFVLEFFLPK  
DCRDPEQQKHMLNSLSLVVQQACRSLHLHVVIDDTDNANHHHDHDQDQFTPTTTTTNNYMPSSASDAATAS  
LSQVDATSGCSTKDTSSSCSWIAHMMEA QHKGKGVSVSLEYLQEPKEEFKVTTCNWDREGENSVFSEFGQVL  
QHDQSSNSRASVEAGEESGGCGVGGGRRSSSSSSGRKSGDKRRTKAEKTISLPVLRQYFAGSLKDAAKSIGVCP  
TTLKRICRQHGITRWPSRKIKKVGHSLKKLQLVIDSVQGAEGAIQIGSFYASFPELSTATANGGGGGGGDHNNV  
NNSFYNSHGDGVVNLKSPPSACSQTHAAGNKLITANIINGDHHHHHHVMMTENPAAPLAADSLMMHGSN  
INIQNYQQQLQEDQDTKQLLLHFNNNNQTLPPRPTAGAWNNNNNNSSSSGLLGA FRVKATFADEKIRFSLQA  
MWGFRDLQLEIARRFNLNDMNNLV LKYLDDEGEWVVLSCDADLEECKDLHTSSHTRTIRLSLFQASPLNIPNN  
FVRNSSSSPSS

>Trifolium\_pratense\_Tp57577\_TGAC\_v2\_mRNA9575

MFDILFDSEKEHLCCTDIEIKKEVVEFKPEVEERKKITISGEDTKSLSRDTISQYFYMPISQAAKELNIGLTLKKRCR  
ELGIGRWPHRKLTSQT LINNVQELREEEELSD EKL MNVIEMLEKEKKLVEEMPDMELDYRTKRLRQACFKAN  
YKKRKLMEQVF

>Trifolium\_pratense\_Tp57577\_TGAC\_v2\_mRNA19433

MDFFAKPETSYWFCNDQSQQNDTDKIMDMTPYDDFVNIDWANHF SYQSNKFLNEFHDLNFNFDNLPNL  
DENLDVEQKPTNVVFP ELVHNTEKVESVCESAFSETSEKVGKGLMSFVKKEE EWENQDSPFGGND FSFAESGF

VETFAKHGNEFLNFVKNENEFSIPLTLPSSNVIMKKKSSLLQFDEIKEHFDVPITMAAKKMNIGVTLLKRRCREL  
NINRWPHRKLKSLMLLIDNLKEMGLEDEVAMLEKEKKMLEEIPGMELNAEIKKLRSFFKANYKKRRSNTFHP

>Trifolium\_pratense\_Tp57577\_TGAC\_v2\_mRNA8649

MEEDSLKIALEVLEELKMKGNEIGRGDSKVVVANSSMVEVMGGVLNDGQSIKKKKNNIEVKDIYPLKYPICPKC  
KGEFFTFSAVIEHLLKNPNCASCGTSNPHQLVDLNKGADEVQQMEIEGSSNAAAAPKPAECFVGKKKRATRDH  
VAKITVSDLVKYFDMPLLEASKKLNVTTLKRRCRELGLPRWPHRRIKSLDTLIHDLHQEEAAHKEMKNKAAA  
MAVRRKQKMVESEKERIEKKPFIAIKSETRRRLRQYVFKRRYHARVMEKQN

>Trifolium\_pratense\_Tp57577\_TGAC\_v2\_mRNA8651

MDSSLTLLLLFNNTIQPELMRSVHVYRGECDGEEREVEVEREFVFSKNGSYVEMQATPILSLLKSFVSKEIFEG  
YTNGVWLKICFAFHAYNTPPFSHIPTLLLVTNRNPKLQAIPNLLNDLHMIYKLPKEEPKDTPESSAAESKGNNNNF  
QPPKKLFPVLNQDLNCLPYEDDESELLDDKSGLLDNKSELLGDETDFFESSGSGVGGKKRAASDIVAKITLPDLVKY  
FDMPIVEASKSLNVGLTVLKKKCREFGIPRWPHRRIKSLDSLIHDLQEEAKHQDMEDKAAAMAVLRRQKMLEC  
EKENIEKMPFMDIRSETKRFRQEVFKRRHRSRVMEKQNSTVASN

>Trifolium\_pratense\_Tp57577\_TGAC\_v2\_mRNA27901

MPESSEENQDFPPKTKTSLEEHCAMDFDLLETSWPLDHMSFISNPMSPFLFSTISDQPSPLWDFDTGEGE  
NHNKLAASAFSDCHKIFSCDSNSITEKPVKDDNKTLLPPLPIEHLDRYCGIKEKMTQALRYFKELTEMNVLAQ  
VWAPVRNGNRFLVTTSGQPFMLDPHSNGLNQYRTVSLMYKFSVDGENDGTGLPGRVFGQKLPEWSPNVLY  
YSSKEYPRRDHAQHYNVRGTLALPVFEPSPSCIGVLELIMTSPKINYAPEVEKICKALEAVNLRSEILDHPFTQIC  
NEGRQNALSEILEITVVCETHNLPLAQTWVPCRHRSVLAHGGGFKKSCSSFDGSCMGQVCMSTTEVASIIDA  
HLWGFREACVEHHLQHGGQVAGRAFLSQNMSFCSNITQFCKTDYPLVHYALMFGLGICFAICLSFYTGDDDY  
VLEFFLPPGITEFHEQKTLGSLATLKEHFQSLKIAAGVELEENGPIEIEATDEGIRLRTESIPAIQSIKSPFIPDASP  
MEEVPQDDPSGIHGEDIIGGSINPMSPPLGNKNIKKPSERKRGKTEKSISLEVLRQYFAGSLKDAAKSLGVCPTTMK  
RICRQHGISRWPSRKINKVNRSLSKLKRVIESVQGAEGAFLNLSLNNQLPIVSSFPEPSTPNKSNQQGSLNIKPS  
EPQMKENEFDAASKVSETNIQAVMEDQLLGGRKHSKDKEVINDKGVSIREIGNDRKTRTRSGSSEDSTNPASH  
GSCHGSPNEISTVKDLFIPSNNEQCIVLRGSPESRVQPTNAFNSPTAHCLPDNVLAELQEPFGGMLIEDAGSSK  
DLRNLCPVAAEAILEDMAPEACGTNLPGSYMAPPKQCMDTINNNSVMPFAVRKEMKTVTIKATYREDIIRFR  
VSLNCGIVELKEEVSKRLKLEVGTFDIKYMDDDNEWVLIACDADLQECMFVSRSSGGSNIIRVLVHDITSNLGSS  
CESSGE

>Trifolium\_pratense\_Tp57577\_TGAC\_v2\_mRNA35367

MNMEDQFSSKDNGISFWTPLDNGMKSSITSDDMFNNISELMNFDNYAGWCNGSSSLIDQTLTSDLSFFAYSP  
HDGLSLVEQINGPFFMTDIGGNYSTTSYEEKVLLQOMETQFAFVDNANETNNNNLDSQFDMCNVYMSKSPS  
WSLDERMMSALSFFKESAGGGILAQFWVPIKYGDEIVLTTSNQPYLLDQKLAGYREVSRSFTFAEIKMGACCP  
GLPGRVFISHVPEWTSNVGYHKSEYLRDLHAISHEVRGSIAPISDMNSEVSCSAVLELVTTKEPNFDKELEYV  
SHALQRMNLRITIPRLLPQCVSNNKRAALAEIVDLRAVCHAHRLPLALTWIPCYSEGKGEESERLRIKEGRTT  
NSDEKCVLCIEESACYINDKMVEGFVHACSEHHEEGQGIGSKALQSNHPFFYTDVKAYDISEYPLVHHARKYNL  
NAAVATRLRSTYTNDDDYVLEFFLPIDMIGSSEQQLLDNLSDTMRRICKSLRTVSEGELRGIEVSQDGFPKENIS  
GFFPMSKGNISQIAFSTGDPDLFQMPLMAANNGIQGSHSQVTSESARKQAEKRRNAVEKNVLSVLQQYFSGSL  
KDAACKIGVCPTTLKRICRQHGISRWPSRKINKVNRSKKIQTVLDSVQGVGVLFDPHTGGFVAGGSIIEQIGT  
CNKNLMFPEKSSVENSAIKLEDDGVLISNSCEGDLKKDNNASSDDYIQDSTSWLWTKTHECPKQNSIDSVLEKE  
EDQCGLNNSSLHDIASNSSFLIELGLDEGKGLDEPNHPTSSSMTDSSNASGSMVRGSSSGSQQSIENHKNKIKS  
ICVDSESKFAVKATFRGDTIRFKFDPCLGCFQLYEEVATRFKLRNGSFQLKYLDDEEWVLLVNDSDLKECEVLS  
DSGTVCVKLLVRDIHGDGNS

>Trifolium\_pratense\_Tp57577\_TGAC\_v2\_mRNA12227

MWYFENCTIADFILDYDAKNLLPMGNEVDGGFYAENNVFSISNNIVENNAKEIMKGKRCREENSARMLTRKTIS

EYFYMPISQAARELNVGLTHLKKRCRDLGIQRWPHRKLMSLQTLIKNVQEQGDESDEKIRNAVEILQKEMKKVE  
EKPDQLQEENTKRLRQACFKANYKKRRMLMVMRLMDHQHSSISEIESVNDHIRV

>Trifolium\_subterraneum\_Tsud\_chr1.g44340.1.am.mkhc

MPSEEEENQDFPPKTKTSLEEHVCAMDFDLLETSWPLDHMSFISNPMSPFLFSTISDQPSSPLWTFTDGEDE  
NHNKLAASAFSDCHKIFSCDSNSITEKPVKEDENKTLLPPLPPIENLDRYCGIKEKMTQALRYFKELTEMNVLAQ  
IWAPVRNGNRFLTTSQGQPFVLDPHSNGLNQYRTVSLMYKFSVDGENDGTGLPGRVFQKKLPEWSPNVLYY  
SSKEYPRRDHAQHYNVRGTLALPVFEPSPSCIGVLELIMTSPKINYAPEVEKICKALEICNEGRQNALSEILEITV  
VCETHNLPLAQTWVPCRHRSLAHGGGFKKSCSSFDGSCMGQVCMSTTEVASYYIDAHLWGFREACVEHHLQ  
HGQGVAGRAFLSQNMSFCSNITQFCKTDYPLVHYALMFGLTGCFACLRSlyTGDDDYVLEFFLPPGITEFHEQK  
TLLGSILATMKEHFQSLNIASGVELEENGSIIEATDEGIRLRTYIPIAQSIKSPILDASPNNMEEVPQDNPSGIHG  
EDVGSIDPMSSSLANKNIKKPSEKRGKTEKSISLEVLRQYFAGSLKDAKSLGVCPTTMKRICRQHGISRWPSR  
KINKVNRSLSKLRVIESVQGAEGAFDLNSLGNNQLPIVSSFPEPSTPNKSNQQGSLSIKPEPQMKENEFDASK  
ASETNIHVVMEDQLLGGGRKHS�DKEVINDKGVSQIEIGKDRKTRTRSGSSEDSTNPASHGSGCHGSPNEMSN  
VKDLFIPSNNEQCVVLRGSPESRVQPTNAFNSPTAHCLPDNVLAELQEPFGGMLIEDAGSSKDLRNLCPSSVAEAI  
LEDMAPEACGTNLPGSYMAPPKQCMDTINNNNSVMPFAVRKEMKTVTIKATYREDIIRFRVSLNCGIVELKEE  
VSKRLKLEVGTFDIKYMDDDNEWVLIACDADLQEClyVSRSSGGSNIIRVLVHDITSNLGSSCESSGE

>Trifolium\_subterraneum\_Tsud\_chr2.g36860.1.am.mk

MNMQDQFSSKDNISFWTPLDNGMKSSITSDDMFNNISELMNFDNYAGQGIGSKALQSNHPFFYTDVKAYD  
ISEYPLVHHARKYNLNAAVATRLRSTYTNDDDYVLEFFLPINMIGSSEQQLLDNLSDTMRRICKSLRTVSEGELR  
GIEGSRDGFLENISGFFPMKSGNSQIAFSTGDPDLFQMPLMAGSHSQVTSESARKQAEKRRNAVEKNSVLSVL  
QQYFSGSLKDAKKIGVCPTTLKRICRQHGISRWPSRKINKVNRSLKKIQTVLDSVQGVGVKFDPTGGFVA  
GGSIIEQIGTHNKNLMFPEKISVENSAIKLEGDGVLSNSCEGDLKKDNNASSVDYIQDSTSWLWTKTREC PKQK  
SIDSVLEKEEDQCGLNSSSLHDIASNSSFSLIELGLDEGKGVDEPNHPTSSSMTDSSNASGSMVRGSSSGSQSIE  
NHNKNSKISICVDSESKFAVKATFRGDTIRFKFDPCLGCFQLYEEVATRFKLRNGSFQLKYLDDEEEWVLLVNDSD  
LKECVELSDSGTHCVKLLVRDIHGNS

>Trifolium\_subterraneum\_Tsud\_chr2.g58920.1.am.mkhc

MEYPPFYPKGRGIGYWQSPGTQLEESRLDGGISNLVSEDMPSSFSELMNFDTYAGLCGSPSMTDQIMANELPS  
LASVLYQSPDEFNLVEQNTGQFYMTGVSGNYNNESSPVFGEKIVRQQMDSLLGLLDNNNDANNLSSKQKFN  
DSSQHVNTFDMNCIISKPPALSLEKMLKALSFFKESAGGGILAQVWVPIVHGGQVFLSTSEQPYLLDQMLA  
GYREVSRFTFTSTEGKPGFLPGLPGRVFISKVPEWTSNMGVYSPSEYLRVEHARNHDRVGSIAFPIDLQSGLPCC  
AVLELVTTKEKLDRELEIICRSLQLVNLRTTMPFRLLPECLSNKRAALTEIVDLRSVCHAHRLPLALTWIPCFY  
TEGTRDETTRIQUIKEGNSSSREKNILCIEESACYITDAMEGFVHACIENPLEEGKGVAGKALQSNHPFFYSDVKTY  
DISEYPLVHHARKFNLNAVAIRLRSTYTNNDDYILEFFLPINMKGSSSEQQLLDNLSGTMQKICKSLRTVSGAEL  
SEIESSQAGFEKNSVPSFPSSKRKSRIPIFENHGSVHKLSSKASNLNRNNGNEPSSNQERNGPRRRGEKNRSSS  
EKNVLSVLQQYFSGSLKDAKSIGVCPTTLKRICRHHGISRWPSRKINKVNRSLKKIQTVLDSVEGVGGLKFD  
SVGAFVAKGTAIQEIDENRSLFPEKSTTEDSEPFSDAALVPPAHCSDESENSANKLNGKLKEINASLIDCEDSKS  
FAMDDCPEQACFGSVLGKGDWVLNKGGLREEKCKHNTIGHRTNSFAVYEMDTGVDGDDEAVEHNNPASS  
SLTGSSNSSGSMVHDSSSGYQNRNQKQSKSIIVDSGSKIVVKATYGEDTIRFKFDPATGCLKLYEEVASRFKLQ  
NGTFQLKYLDDEEEWVMLVNDSDLQECLEILNDMGTHNARFLVRDTPCTFGSSGSSGSYLGGSS

>Trifolium\_subterraneum\_Tsud\_chr5.g11950.1.am.mkhc

MDSSLTLLLFNNTIQPELMRSVHVYRGECDGEEREVEREFVSENGSYVEMQATPILRNPKLQAIPNLLNDLL  
MIYKLEPKEERRDTPESSTAEEKGNNDNVQPPRKVFPVLNQDLNCLPYEDDESELLDDKSELLDTKSELLDET  
DFESSSGSVGKKRRAASDIVAKITLPDLVKYFDMPIVEASKNLNIGLTVLKRKCREFGIPRWPHRRIKSLDSLIHDL  
QEEAKHQEMEDKAAAMAMIRRQKMLECEKENIEKMPFMDIQSETKFRFRQEVFKRRHRTRVMEKQNSTVAS

N

>Trifolium\_subterraneum\_Tsud\_chr5.g12030.1.au

MEEDTLKTALEVLLELKMKGKNEIGRRDPKVAVANSSMVEVMGGAVHDGQSIKKRKNNIEVKDIYPSKYPICPRC  
KGEFFTYSAVVEHLLKNPNCASSGTSNPPQLDLNKGAEIEVQPMIEGSSNAAAAAPEPAERKKKRATRDHVA  
NITVSDLVKYFDMPLLEASKNLKIGTTVLKRKRELGLPRWPHRRIKSLDSLIDNLHQEEAEHKEMENKAAAMA  
VRRKQKMVESEKERIEKKPFTSIEGETKRLRQHVFRRYHARVMEKQNSTVSSN

>Trifolium\_subterraneum\_Tsud\_chr5.g12040.1.am.mk

MKSPNPNSKNSIACPKETNPPFKSSKGSMEEDTLKTALEVLLELKMKGKNEIGRRDPKVAVANSSMVEVMGGA  
VHDGQSIKKRKNNIEVKDIYPSKYPICPRCKGEFFTYSAVVEHLLKNPNCASSGTSNPPQLDLNKGKKRATRDH  
VANITVSDLVKYFDMPLLEASKNLKIGTTVLKRKRELGLPRWPHRRIKSLDSLIDNLHQEEAEHKEMENKAAA  
MAVRRKQKMVESEKERIEKKPFTSIEGETKRLRQHVFRRYHARVMEKQNSTVSSN

>Trifolium\_subterraneum\_Tsud\_chr5.g43000.1.am.mk

MEYGGGLVGDGGVFGNMVGGGGGEADMIEELLVDGCWIEASENNMMAMQSQTTHYMTNNNIPINGMGEG  
DHFNNHHHNQIECNVPTDHDDQESGFVVGKRWVIGPRANPGPSTSVKERLVAVGYLKEYTKNSSNNVLI  
QIWVPALRRRSPLIHNHYLHESSSSAPVSVNPNTNVHVRFFRSHEYPRHQQQYGSFLALPVFERGSGTCLGVI  
EFVITNQTVVNYRQLDHLNALEAVDFRSSHNINIPSAVKVFEELYEAAVNEIVEVLASVCKTHNLPLALTWAPC  
IQQQGGGVRGKGTAGAAAGCGVSVTAPTQDMMNNNNQMMMNCVSTVDSACYVGDMEVLGFEVCSEYHLF  
NGQGIVGTAFTTKPCFAIDITAFSKAEYPLAHHANMFGLHAAVAIPLRSVYTGSAADFVLEFFLPKDCRDPEQQ  
KHMLNSLSLVVQQACRSLHLHVVMDDTDNANHHDEHQDQFTFPTTTNNYMPSSASDAATASLSQVDATSGC  
STKDTSSSSCSWIAHMMEAQHKGKGVSVSLEYLQEPKEEFKVTCNWDREREGNSVFSEFGQVLQHDQSSNSR  
ASVEAGEESGGCGVGGGRRSSSSSSGRKSGDKRRTKAECTISLPVLRQYFAGSLKDAKSIGVCPTTLKRICRQH  
GITRWPSRKIKKVGHSLLKLQLVIDSVQGAEGAIQIGSFYASFPELSTATANGGGGDHSNVNNSFYNSHGDGVV  
TGLKSPSSCSQTHAAGNKLITANTINGEHHHHVMMTENPTGPSAADALMMHGSNINIYQQLQEDQDTK  
QLLLHFNNNNNNQTLPPRPTGGAWNNNNSSSSGLLGERGAFRVKATFADEKIRFSLQAMWGFRDLQLEIARRFN  
LNDMNNLVLYLDDEGEWVVLSCDADLEECKDLHTSSHTRTIRLSLFQASPLNLPNNFVRNSSSSPSS

>Trifolium\_subterraneum\_Tsud\_chr6.g32900.1.am.mkhc

MQESEENHDLAKSKPLEENGFSMDFDIDFENLWPLDHISNTMYPFLLSTTSEQHFSPWTFSDVEDDSIAAS  
GNNTKTETDNRVENDDKKKHVTPHHVEVVPNLQTLHGCLIKERMTOALRQFKELTEQNVLAQVWAPVRNG  
NRYKLTTSGQPFVLDPHSNGLHQYRTVSLMYMFSVDGENDEILGLPGRVFQQKLPEWTPNVQYSSKEYSRLN  
HALHYNVRGTLALPVFEPPGQSCVAVLELIMTSQKINYAPEVDKVCKALEAVNLRSEILEYPYSQICNKDRQNAL  
SEILEILTVCETHNLPLAQTWVPCRHRVLAHGGLKKSCSFDGYCMGQVCMSITEVAFYVIDSHTWGFHDA  
CVEHHLQQGQGVSGRAFLTQNMFCENITQFCKTDYPLVHYALMFDLTSCFSICLQSSHTGNDEYVLEFFLPPSII  
EFCEHKALLGSILAIMKQNFQSLKVASGFEEEDGSIEVEILNGRVHSRVESVPIIQSEKLSTRHDDASPNMEEGV  
LPLDPLQQKVITSFDDINDRRILDVNTGGNIDRISSLETKTKKKTSQRKRGKAEKSISLDVLQNYFSGSLKDAAKSL  
GVCPTTMKRICRQHGISRWPSRKIKKVNRLSKLKCIVESHGVEGAFGLNSPTTSPLHIASSSFNQPSTSNKFEH  
QTALNIIPSEPKMNENYLNASKSQPEFFIGMLIEGADSCSKDLKNMCPLADTVLEDQILEASRTNPPCFDFAPL  
AEKEMKIVTIKATYRDDIIRFVSLNCGIVELREEISKRLKLEVGTFDIKYMDDDQEWILVACDADLQECMDILTSS  
GSNIIRLVVHDIVSILGSSVEISE

>Trifolium\_subterraneum\_Tsud\_chr6.g32910.1.au

MTQALRQFKELTEQNVLAQVWAPVRNGNRYKLTTSGQPFVLDPHSNGLHQYRTVSLMYMFSVDGENDEILG  
LPGRVFQQKLPEWTPNVQYSSKEYSRLNHALHYNVRGTLALPVFEPPGQSCVAVLELIMTSQKINYAPEVDKV  
CKALEAVNLRSEILEYPYSQICNKDRQNALSEILEILTVCETHNLPLAQTWVPCRHRVLAHGGLKKSCSFD  
GYCMGQVCMSITEVAFYVIDSHTWGFHDACVEHHLQQGQGVSGRAFLTQNMFCENITQFCKTDYPLVHYAL  
MFDLTSCFSICLQSSHTGNDEYVLEFFLPPSIIEFCEHKALLGSILAIMKQNFQSLKVASGFEEEDGSIEVEILNGR

VHSRVESVPIIQSEKLSTRHDDASPNMEEGVLPDPLQKQVITSFDDINDRRILDVNTGGNIDRISSLETKTKKKT  
QRKRGAEKISLQNYFSGSLKDAAKSLGVCPTTMKRICRQHGISRWPSRKIKKVNRSLSKLKCVIESVHGVE  
GAFGLNSPTTSPLHIASSSFNQPSTSNKFEHQ TALNIIPSEPKMNENYLNASKSQPQEPFIGMLIEGADSCSKDLK  
NMCPLADTVLEDQILEASRTNPPCFDFAPLAEKEMKIVTIKATYRDDIIRFRVSLNCGIVELREEISKRLKLEVGT  
FD IKYMDDDDQEWILVACDADLQECMDILTSSGSNIIRLVVHDIVSILGSSVEISE

>Trifolium\_subterraneum\_Tsud\_chr7.g11400.1.am.mkhc

MGDGAAVTSSATMMEGPSQDENSMDFDYMSSELLDGCWLEASADGSEFLLQSSPFSNPIFDPSFSWPSLENT  
EPTRNEDGHVGVEQESQIIVNNAGSSDRQQCEFETRSGEGVSRLWIPPTPNPGLGGSSITEKLIRALKWIKDFN  
RNKDMLIQIWVPVNRGDDRPILRANDLPFSLESRLNLAKYREISVRYQFSAEEKDSKELVAGLPGRVYRDKIPE  
WTPDVRFFRSEYPRVDHAQECDIHGT LAVPVFEQGSRTCLGVIEVMTTQQSNYGRELETVC KALEVVDLRSS  
GHSSLQNVKACDKSYETALPEIQEVLRSACEMHKPLAQTWISCIQQGKDGCRHSDDNANCISPVDYACYVG  
DSSVRFFHEACMEHHLLKGQGVAGGAFVTNQPCFSADITSLSKTDYPLSHHARLFLRAAVAIRLSIYSTSDDY  
VLEFFLPVDCNDIEEQNMMLTSLSMIIQVRCSRSLVITDKELDKDHLSSNEVMAVTDGQFATNAVWSESQHRG  
MAASLGGEKFSETMGRKFSEQRRQETLT LKGDLDCGRVRSPSVEGTF LSSLGINRTGEKRRAKAEKTTITLQVL  
RQYFAGSLKDAAKNIGVCTTT LKRICRQHGIKRWPSRKIKKVGHSLQKLQLVIDSVQGASGSFQIDSFYKFS  
DLS SPRTSLISTLNQIDNQVSLSTLPDPDSLPEGASKSPSSSCSQSSFSSHSCSSMSEQQHHKGDVAAGNKDPSVGE  
DSVDVVLKRIRSEAEKSLIQDNKTKLMPRSQSQETLGENPKTEHHKSLLKTARKASQKEDSHRVKVTFGDEKTR  
FRLPKKWGYEDLVQEIARRFNVSEMSKFDIKYLD DDYEWVLLTCDADLEECIDVSQSSETSTIKLCLQPSSNFIRSS  
LEFR

>Trifolium\_subterraneum\_Tsud\_chr7.g15020.1.am.mkhc

MHEDQQLSLPSIQTPALPNQNEVLAIQWPPTQMPFFCTCCQVLEIIHANGFQFEKLEIHGRVGLITHAIHHQ  
LPVNGNNPNYQMIESSLDEIKKY LAKYCVDRNSSGYFILQDPMSAFYETLCTGLDWIDDINMEGLLDNNQTN  
S DDMGENGTDPKKDL SAKRKKSASLTSLDRDYFHLPIEEASDHPNVKLCPTVLKKTCTRKAGLQRWPYRKVKSLL  
KQIALMGAQLDGDSTARARTEHEINRLKQEMIAHCGGIPTAMYNIAAFLPLQYQQQQ

>Trifolium\_subterraneum\_Tsud\_sc00745.00.g00050.1.au

MDISPFDDFFNIDWENQFSYQSNKLYINEFIDFENFDFSLPQLDENLEKEPKPINLVLPELVHNNNEKDESVCQS  
AFSGSSEEVGNFVKKEKKWEIQDMPFGENGFSFAETYAKSGNEVENQDFPKSLILASSSLIRKKRSCLLQFDEIK  
KHFDVPITMAAKMMNVGV TILKRRCRELKINRWPHRKLKSLMVLIDNLKEMGLENEVAKLEKHKMLENIPG  
MELNEEIKLRQSCFKANYKKRRTSSFHP

>Trifolium\_subterraneum\_Tsud\_sc01256.00.g00010.1.au

MVEEFVHACSEHHLEEGQGISVKALQSNHPFFYTDVKAYDISEYPLVHHARKYNLNAAVATRLRSTYTND DDYV  
LEFFLPINMIGSSEQQLLDNLSDTMRRICKSLRTVSEGELRGIEGSRDGFLKENISGFFPMSKGN SQIAFSTGDP  
DLFQMPLMAGSHSQVTSES RKQAEKGRNAVEKNVSLSVLQQYFSGSLKDAAKKIGGETPSIFVKICPTTLKRICR  
QHGISRWPSRKINKVNRS LKKIQTVLDSVQGVGVKFD PHTGGFVAGGSIMEQVGT HNKNLMFPEKSSVENS  
AIKLEDDGVLISNSCEGDLKKNVSSVDYIQDSTSWLWTKTREC PKQNSIDSVLEKEEDQCGLNNSSLHDIASN  
SSFSSIELGLDEGKGVDEPNHPTSSSMTDSSNAFGSMVRGSSSGSQSIENHKNSIKSICVDSSEKFAVKATFRGD  
TIRFKFDPCLGCFQLYEEVATRFKL RNGSFQLMYLDNEEEWVLLVNDSDLKECVQLSDSGTHCVKLLVRHIHIV  
DSSQICLSI

>Vigna\_angularis\_vigan.Vang0090s00160.1

MEFASEHDFPNFETIPHTFSSCFFSAQLYPTDNTILFFFLFACLDEWYFNGVCD FRTMEVSLSPLEGFSGHDWTQ  
QLPYSSKQLCLNEFPDLENLDLDFSLPLGEDLEEVEQKPLNIIVVPEEGHCGREKGF GDALLAIENGSAICVKKEE  
VQNMEQMAVPSASSGSKKKKPCALEFEEIKKHFDVPINEAAKQMN VGLTMLKRRRCRELNIMRWPHRKLKSLQ  
LLIENVKVMYPDMLVMSYELGLADEVPMLEKHKRLEKLPGLLECAKAKLRQACFKANYKRRRFMGMTLQA

>Vigna\_angularis\_vigan.Vang02g05230.1

MSESKEENPDFLPKSKPQEEHGFAMDFDIGFESNTKAVIENPVENYDNKKYVSPSLVAVPPSENSDGYCLIKER  
MTQALRHFKELTEQNVLAQVWAPVRNGNRYALTTSQGPFVLDPHSNGLHQYRTVSLRYMFSVDGENDEILGL  
PGRVFQKKIPEWTPNVQYYSSKEYQRLNHAQHYNVRGTLALPVFEPAGHSCVAVLELIMTAPKINYAPEVDKIC  
KALEHALAEILEITVCEHSLPLAQTWVPCKHRSVLAHGGGHHKSCSSFDGCCMGQVCMBSITEVAFYVIDAHT  
WGFHEACVEHHLQQGGQVAGRAFLSHNMCFCGNITQFCKTEYPLVHYALMFGLTSSFAVCLQSSHTGNDEYVI  
EFFLPPRITEFNEQKTLRLSILATMKPHFQSLKIAAGVELEQNCSIEIIEPRKERVHLWFESIPITQSSMSPPRHASPS  
MGERLPLEPSEQQITDDFDDINDGRNLGDNTDGHIDQNTSLEPRTKKKPSERKRGKA EKSI SLDVLQHYFTGSLK  
DAAKSLGVCPTTMKRICRQHGISRWPSRKIKKVNRSLSKLKCVIESVHGAEGAFLNSLSNGSLPIAAGSFSEPT  
SNKFNCQTSLTIRPSEPKINEQDFDASRASEKNRQAGLEAHFLSTRTONPEKAINEKVAVQEI GTKTTRFRRTGS  
GSSEESANPSPHGSCQGSPPNEMSPPKDIFVTGTSEQCLVLRGSLGSTLHSTSTPNRATANPMPNFVETTEPQE  
PFGGQLLEGVARGIGNLVSNGLNEPVCSPSIATQTYLVLNPCAFTQLCSLSYQKNSSRLLCQKRKEIHDQPFH

>Vigna\_angularis\_vigan.Vang05g00050.1

MEYGGFSDIFAPETEFMDLFEVGCWVETRVGCGTEASKWNRSME SNGAHII FEEESEAESLMVGKRW WIGP  
RGNPGPSSSVKERLVAVGYLKEYAKNSNMVIQVWVPARRGCEVGIHHHQDFPYTLDTNNGDATGSFQFHE  
DWLSDHWPPNIRFLRTHDYTRLHHYDLRPGSLALPVFQRGTGICLVQVLTVCCKAHELPLALTWAPCIQQGKSG  
CGHSNDENYVSTVDPACFVADVVLGFLEACSEYHLLGGQGVGTAF TT SKPCFANDITAF TKA EYPLAHHAN  
MFGHLHAAKGKGVSVSLEYLQEPKQEFKVT TNGNEQVFS DLEGTSGAGVGRRGRKSGDKRRTKAEKTISLPV  
LRQYFAGSLKDAAKSIGVCPTTLKRICRQHGITRWPSRKIKKVGHSLRKLQLVIDSVQGAEGAIQGSFYTSFPELS  
SANGVSESPKINS DNSKFYSENGLFSNQGV TSTSSCSQSCGGTFRVKATFGDEKIRFSLQPNCGFRDLQMEIARR  
FNLKEMSKIQVKYLDDAQEWVLLTCDADLEECKDINRSSQSRTVRLFLFHASPLNHSTNAFGSTSPT

>Vigna\_angularis\_vigan.Vang05g03830.1

MDNNC NNYSDSFHSP LIGNYIEPDALIYILNDQPNVQQRNAQQNDPFVVEQDHVSFTGLTIQDVSTHSDNDF  
TIGGV PNLENGGWSTRKRKFPYMDSMIEGHPVHGDNTFPNELQFWPPGPFDDIDASFDPFLHNLIDRDISIF  
DLSNDELIA PSSQQNALPQHQA VPGQQNALCKQP NAPPQNQNL YPFGLEQIHVPILNPTFQDQSLHVNYNF  
ATGEV PNIDMEGPSRRKVKQPM AEHP LLKHGILNEEDVPVRFSSSFSLNFKHSAGFKFEKLEIHGSLGVIGHAI  
FHVQDMTPGGEPPREYVQMIKQLLYSLLT FIFSGITSFGLKSIEQIRSF L VAYCKDQTRLGFVTLD DPLSAYDYTICT  
GLDWA EHNDGDDDLSPRWSSSLNSQRKRVPKMTMNDLS PFFHLTIRDAADKLEVSDSVVKKISRLGNLKRWP  
QRKLQSLAKDVRVRLKALDSPYEGTRQVRVQEIQRLQLEMVAICGGVTPTGIEIIQFEE

>Vigna\_angularis\_vigan.Vang06g08410.1

MSESEENTDCVPRSKPAEEVGCTMDFDLDET SWPLDHMSFGSNPMSPFLFSSNSDQPYSP LWAFSDGEDA  
KFPASAFSDCHKIFPCDSNSIAEKPEENDDNKLLPLAPMTPLENVGGYCVIKERMTQALRYFKELT ELNVAQ  
VWAPVRNGNRYVLTTSQGPFVLDPHSNGLHQYRTVSLMYMF AVDGEN DGSLGLPGRVFQKKLPEWTPNVLY  
YSSKEYPRRDHAQHYNVRGSLALPVFEPALQSCVGVLELIMTSQKINYAPEVDKICKALETVNLRSEILDHPYTIQI  
CNEGRQNALSEILEITVVCETHNLPLAQTWIPCKHRSVLAQGGGVKKICSSFDGSCMGKVC MSTTDVAFYIIDA  
HLWGFREACVEHHLQQSQGVAGRAFLSHSMCFCSITQFCKTDYPLVHYALMFGLTSCFAICLRSSHTGTDDYV  
LEFFLP PRVTD FHEQKTL LASILATMKQH FQSLKIASGVELEDGSIEIIEATIERI HTRHESIPIAPSIRSPRPDTS PN  
MEEEVSLDPSEQHILMYCNGTNHGANLSDKAGGKIDHMITLET KTSKKPLERKRGKTEKSISLEVLRQYFAGSLK  
DAAKSLGVCPTTMKRICRQHGISRWPSRKINKVNRSLSKLKRVIESVQGAEGAFLNSLSTSP LPIAVGSLPEPST  
RNKFSQPVSMSIRPSEPQMKVNELNASKELE TNREAGMEDQLVGGRIHNLERVTNDKGGSTQEIGKEPKRTRT  
GSGSSEDSTNPTSHGSHWDSIPNESSPVKDIFITSNHDQCAVLRRSPESTLQPATNTPNQATPFCMPEFVAAEL  
QEPFGGMLIEDADKRS

>Vigna\_angularis\_vigan.Vang09g02510.1

MENQQLTFWNSNYQIDENSFAPTCQFSYDYFRKSYHVSIFNFCRGNASDGFHWPYEFPLQDSYFDVVPFMKC  
YYPHDILYETLPLEPTPLSFQGFAGADYDFSDVKNVLSAWNEVDVSDHKPAFSSSNDGGSVNETMEEVKGKQH

REERISSARILSRKTVSQFYMPISQAAKELNVGLTHLKKRCRELGIQRWPHRKLMSLQTLIKNMQIWNLKIKQ  
EGLDKLSRLTTRRGNS

>Vigna\_angularis\_vigan.Vang11g11480.1

MIMDSHPLMSWSSYYQIEENPLPFTCQFSYSENSEVYPPPLQDLPIQEYHHDVPLTEYYPSDPLYETLAIPTPT  
LRADCDFYDISKGLPVWNEVNAVFDSEVDFLFRKKEESLKEMVDDRKNVNEGREEITNPRNSRKLRSRTISEFY  
MPITQAAREMNVLTLKKRCRELGIRRWPHRKLMSLQTLINNVQELLKEEGPESEEKLRFAIETLENEKKLEE  
MPDIELEDNTKRLRQACFKANYKKRKLGRPEECSSWSGAMSEYNNSEEEELDMKYLLSQLA

>Vigna\_radiata\_Vradi0553s00010.1

MEYPFSSKEREIGDWQSGFNQLVGSTSLDSRMSNSISEDMPNSFSELMNFDTYAGLCTSPSISDQILANELPSFA  
SLPYSLPDGFNLVQQNNGQCYMSGVGRNDNDMESSPIYGEKVACQQVDTLLGFLNDANEANNLNSKLKIIGS  
SQHLNNSDAGNYIMSRPPALSLDERMLRALSFKEAGGILAQVWVPIKNGDQFILSTSEQPYLLDQMLAGY  
REVSRTFTFPAEGKSGCFLGLPGRVFTSKVHEWTSADVGYYSMNEYLRFEHAINHHVRGSIAPFIFEMHSELLCCA  
VLEIVTTKEKPDFNREFEIVCRALQLVNLSTAKPLRCLPQCLSNKKATLTEIVDLRSVCHAHRLPLALTWLPCCY  
TEGSRGEVTRIRTKGCHSTISGKNILCLEESACYITDRALAGFVRACTEHHIEEGKGIAGKALRSNHPFFCPDVKAY  
DISEYPLVHHARKYNLNAVAIRLRSTYTNHDDYILEFFLPVNMRRGGLEQQLLDNLSGTMQRICSSLRTVSDAE  
LSRIDSSQQGFEMKNAPYFPPLSCQNSGVPLINGDYHSPMMPSTPTNAGGNEIEPSANQGRNGAKRQVQK  
NRSTSEKNVSLSVLQQYFSGSLKDAAKNIGVCPTTLKRICRQHGISRWPSRKINKVNRSLKKIQTVLDSVRGVEG  
GLKFDPSMGAFVARGSIQETDAHKSLLFPEKNIKDPAHITQEAVPVPRAPCNEVENFSKLEELKKTNSFSVGC  
CEDSKSMAIDDGSCMESLCTKLQDCPEQACLGSLPKEQEKWTRNKSGLRVENFKCSILGQSSNSLIGKEMDI  
GVDGDAEVVEPNHPSSSLTDSSNSDGSMMHSSISGSESFKNHNQSKVKSTIVDSGSKLIVKAIYREDTIRFKFD  
RSAGCFRLYEEVAARFKLQTGSFQLKYLDDEEWVMLVSDADLQECLDILDIGTCSVRFLVRDLPSILTSSGSSNS  
YLGSS

>Vigna\_radiata\_Vradi08g18730.1

MSESEENTDCVPRSKPAEEGGCTMDFDLLETSWPLDHMAFGSNPMSPFLFSSNSDQPYSPWLAFSDGEDT  
KFPASAFSDCHKIFPCDSNSIAEKPEENDDNKKILPPLAPMPPLENVGGYCVIKERMTQALRYFKELTELNVLAQV  
WAPVRNGNRYVLTTSQGPFVLDPHSNGLHQYRTVSLMYTFAVDGENDGSLGLPGRVFQQLPEWTPNVLYYS  
SKEYPRRDHAQHYNVRGSLALPVFEPALQSCIGVLELIMTSQKINYAPEVDKICKALEVGFLTTLWIMPIICSYSKF  
EEFGNFGPSIHSGDLTIRHGASPSVILLFIILTCSHRYNLAMLLNQICNEGRQNALSEILEILTVCETHNLPLAQT  
WIPCKHRSVLAQGGGVKKICSSFDGSCMGKVCMTTDAVAFYIIDAHLWGFREACVEHHLQSSQGVAGRAFLS  
HSMCFCSNITQFCKTDYPLVHYALMFGLTSCFAICLRSSHTGTDDYVLEFFLPPRITDFHEQKTLASILATMKQHF  
QSLKIASGVELEDGSVEIIEATIERIHTRLESIPAPSRPPRPTSPNMEEEGPLDPSEQHILMYCNGTNHGSNLS  
DQAGGKIDHMITLETKTSKKPLERKRGKTEKSISLEVLRQYFAGSLKDAAKSLGVCPTTMKRICRQHGISRWPSR  
KINKVNRSLSKLRVIESVQGAEGAFGLNSLGTSPPLPIAVGSLPEPSTPDKFSQPVMNIRPSEPQMKVNELNAS  
KELETNREAGMEDQLVGGRIHNIERTNDKRGFTQEIGKEPKRTRTSGSGSSEDSTNPPSHGSHWDSIPNESSHV  
KDLFITSNHDQCAVLRSPSTLQPATNTPNQSTPFRMPEFVAAELQEPFGGMLIEDAGSSKDLRLNLCPSVAEAI  
LEDLVPEACGTNPPALDLSPKQSMGAPNKTVPFAATKEMKTVTIKATYREDIIRFRVSLTCGIVELKEEVAKRLKL  
EMGTFDIKYLDDEHWEVLIACDADLQECMDVSRSSGSNIIRVLVHDMTSNLGSSCESSGE

>Vigna\_radiata\_Vradi10g01040.1

MEFASEHDFPNFEIIPHTFASCFSSAQLYPTDKAMMDVSLSPLEGFSGHDWTQQLPYSSKQLCLNEFPDLENLD  
LDFSLPPLGEDLEEVEQKPLNIIVVPEEGHCGREKGFGDALLAIENGSAICVKKEEVQNIQMAVPSGSSGSKKKK  
KPCALEFEEIKKHFDPINEAAKQMNVLGTLMLKRRCRELNIMRWPHRKLKSLQLLIENVKVMYPDMLVMSYEL  
GLADEVPMLEKHRLLEKLPGLELCAKAKKLQACFKANYKRRRFMGMTLQA

>Vigna\_radiata\_Vradi01g14220.1

MSESKEENPDFLPKSKPQEEHGFAMDFDIGLESWPLDHSSVSNPMSPFLLSTIEQPFSPVWAFSDVEDEKQIR

IAIAGNTKAVTENPVENYDNKKYVSPSLVAVPPSENSDGYCLIKERMTQALRHFKELTEQNVLAQVWAPVRNG  
NRYALTTSQQPFVLDPHSNGLHQYRTVSLRYMFSVDGENDEILGLPGRVFQQKIPEWTPNVQYSSKEYQRLN  
HAQHYNVRGTLALPVFEPAGQSCVAVLEIMTSPKINYAPEVDKICKALECHNVPLVRSSDPVVFSLQAVNLRSS  
EILEHPYNQICNEDRQHALAEILEILTIVCETHSLPLAQTWVPCKHRSVLAHGGGHHKSCSSFDGCCMGQVCMS  
ITEVAFYVIDAHTWGFHEACVEHHLQQGQGVAGRAFLSHNMCFCGNITQFCKTEYPLVHYALMFGLTSSFAVC  
LQSSHTGNDEYVIEFFLPRIREFNEQKTLRLSILATMKPHFQSLKIAAGVELEQNCSIEIIEARKERVHLWFESIPIT  
QSSMSPPRHASPNMGERLPLEPSEQQTTFDDINDGRNLGDNTDGHIDQNTSLEPRTKKKPSERKRGKAEK  
SISLDVLQHYFTGSLKDAAKSLGVCPTTMKRICRQHGISRWPSRKIKKVNRSLSKLKCVIESVHGAEGAFLNLSL  
TGSLPIAAGSFSEPSTSNKFNQRTSLTIRPSEPKINEQDFDASRASETNRQAGLEGQFLSTRTONPEKVINEKVVAI  
QEIGTKGTTRFRGTSGSSEESANPSPHGSCQGSPNEMSPPKDIFVTGISEQCLVLRGSLGSTLHSTSIPNHATAY  
PIPNFVETTEPQEPFGQLLEGVGSKDLRLNCPSTDAVLEDQVPEPYRMNPQCSDLAPVQHRDTNNMTPFA  
VRKEVKNVTIKATYREDIIRFKISLNCVIVELKEEIAKRLKLEEGTFDIKYLDDDHEWVLIACDADLQECMDISRSSG  
SNIIRLVVHDILPILGSSCESSGDWKCCI

>Vigna\_radiata\_Vradi11g07090.1

MRSLHVYRQGDDEERAVEREFVFSECGSYVEMQATPILKFVKSHVSRVFQGYKNGVWLCIFAYHADHTPRFYRI  
PLLLLSRNPQLQMPVNLHDLHVIYKLDKREEDKDTTLESKGEECQGNSDNFQSEKVPFLDQDLNLYPYEE  
DESELLENETDVESPVLYHEVQVFTIIDIYVMRSEFAGLLGKKKRAPSDLVAKISLSDLVQYFGMPIVEASRLN  
NVGLTVLKRKCREFGIPRWPHRKIKSLDSLHDLQVLLALPVEHMQEEAKSQELEDMEAAMAVAKRQRMLECE  
KENIEKKPFMDIQTETKRFRQDVFKRRHRARAVGKHNSTVSNT

>Vigna\_radiata\_Vradi02g03910.1

MEDHFSKPKKETGYCTSPCTQLEESTVDGGMKKSASEDMFSNFSELMNFDYAGWSNSSSMTYHSLANVFS  
SFSSASYPPSDGLNLVEHNGPCFMTEVSEIHNGIESSPSCEERGIFQQMDIQLGFLDEANDSNSFDSEQNRNG  
SYQQFNTSDMCNYMISRSSGRPLDDRMLRALSFFMESVDEGMLAQVWVPIKHGDEFILCTSEQPYLLDPKLA  
GYREVSRAFTFSAEGKKGSCGPLPARVFTSHVPEWTSNVGYYNKTEYLRDLHALNHDIRGSIALPVSDMHSHEP  
CAVLELVTTKEKPNFDREIVTHALQLVNLKTTMPRLLPQCLSSNKRAALTEIVDLRAVCHAHRLPLALTWIP  
CCYSEGIGDEAERIRIKEGHTSSNEKCVLCIEESACYINDGAIGGFVHACVEHHLEEGQGIAGKALQSNHPFFYTD  
VKTYDISEYPLVHHARKYNLNAAVAIRLRSTYTNDDYILEFFLPVNMGTGSSEQQLLDNLSGTMRRICRSLRTVS  
DAEITGIEGSAVGLPKEKLYFFPMSSRRNSQIAFINDDNDSNQKMSLKASNNGIEAAHGQVMNGPRKQIEKKR  
STVEKNVSLSVLQQYFSGSLKDAAKSIGVCPTTLKRICRQHGISRWPSRKINKVNRSLLKIQTVLDSVQGVGGLK  
FDPYTGFFIAGGSLMQEIDTHKYILFPERSAVKDPKHATQKPVSVVSAPGSTSENSTIKLDDDDGVCLVENKIVDS  
RSALLSNTSVGGFKDNASSDDCCEDSKSVAMNDGSSQAKNQDCPEQTCISLVTDEAEVGVGGEGIEEHN  
NLVNSSSTTNSSNGSGSGSMMHGSSSCSQSFENQKHSKVKPTSVDSESKMIVKASYRGDTIRFKFDPSAGCFQ  
LYEEVATRFLQNGFLKLYLDDEEEWVMLENDSLQECVEILHDIGTRCVKFLVRDVPCLSSCDSSNCFLSDS  
S

>Vigna\_radiata\_Vradi05g14430.1

MMRDGGVTSSSASMTEAPPPDGTITTKTMDFDYMGELFLDGCWLEASVDGSDFLPQSPSFSNPLFDPSFSW  
PALETNHNESQGAAFGTQQEGHNNNMVNVVVGCGDGGGQENKNMLIQIWWPVHRGGRPILAANDILFSLD  
SRSVNLAKYREISVRYEFAEEGEVKELVPAEKGGSKELLGLPGRVFRDKVPEWTPDVRFFRSDEYPRVDHAQE  
YDVRGSLAVPIFEQGSKMCLGVIEVVMTTQQINYTPELESVCKALEAVDLRSSQLNIHNVKACNRSYEAVLPEI  
QLVLRSAEMHRLPLAQTWIPCVQQGKEGRHSEDNYLLCISPVEHACYVGDPKIRPFHESCTEHLLKGEVVA  
GGAFITNQPCFSDDITSLSKDYPLSHHARLFLRAAVAIRLSILNDTDDFVLEFFLPVDCSDSEEQRKMLTSLSIII  
QRLCRSLRVIDKELEEANSSIDEMIFLADGGFDRTVICEELQHKGTVALWNTEEKLETTGRKFSDPRQQQES  
LNFKGNLDCVRECSTSVQGNLSSVGMSKMGERRRAKGEKITLQVLRQYFAGSLKDAAKNIGVCTTTLKRICRQ  
HGIKRWPSRKIKKVGHSLQLQLVIDSVQGASGAFQIDSFYSNFPELASPNLSGTSMFSTPNQTDNPNISISTQPD

PGSLSPGTSKSPSSSCGQSSISSHSCFSMSELRQQHHTTDISGNKDSTMAGEDSLDVALKRIRSEAEKSLNQD  
KAELLPRSLSQETLGEHPKNQYERPLLKTSSKVDAHRVKVITYGDEKTRFRMPKNWGYEDLMQEIGRRFNVSEM  
SKFDVKYLDDESEWVLLTCDADLEECDVCRSSENATIKLSLQISSHSLRSSLEFR

>Vigna\_radiata\_Vradi07g17040.1

MIMDSHPLMSWSSYYQIEEKPLPFTCQFSYSENSEVYPPPLHDLPIQDCYQGAVPLTEYYPSDPLYETLAIELTPTL  
RADCDFYDISKELSVWNEVNAVDFDSEVDLLFRNKEESLKEMVDDSKVNEGREEITNPRNSRKLSTRETISEFYMP  
ITQAARELNVGLTLLKKRCRELGIRRWPHRKLMSLQTLINNVQELLKEEGPESEEKLRFAIETLEKEKKLLEEMPDI  
ELEDNTKRLRQACFKANYKKRKLQREPDCSSWSGVMSEYNNSEEEELDMKYLSQLV

>Vigna\_radiata\_Vradi03g09040.1

MENHQTLFWNSNYQIDENSFAPTCQFSSYDYFRFFPLYFSTLLSFHVRKSYHVSIFNFCRGNASDGFHWPYEFP  
LQDSYFDVVPFMKCYYPHDILYETLPLEPTPLSFQGYDFSDVKNVLSAWNEVDVSDHKPAFSSSNDGGSVNDT  
MEEVKGKHREERISSARNLSRETVSQFYFMPISQAAKELNVGLTHLKKRCRELGIQRWPHRKLMSLQTLIKNM  
QEQVESEGPENDEKIRTAIEMLEKEKSSVEQKPDLELEDKTRRLRQACFKANYKKRKLMTMRIMEPNLPLPYPT  
SIDKGGE

>Vigna\_radiata\_Vradi05g15890.1

MVIQVWVPARRGCEVGIHHHQDFPYTLDYISNGDATRSFQFHEEWLSDHWPPNIRFLRTHDYPRLHHYDLRP  
GSLAIPVFQRTGICLASFVADVVDLGFLEACSEYHLLGGQGQVVGTAFTTSKPCFANDITAFTKAEYPLAHHANM  
FGLHAAVAIPRSVSSDFVLEFFLPKDCHDTQDQKQILNSLSMLVQQACRSLHVVLDKKEEEELVSHHHHHHSKE  
MESSSWIAHMMEAQQKGKGVSVSLEYLQEPKQEFKVTTCNEQVFSDLGTGGAGVGRRRGRKSGDKRRT  
KAEKTISLPVLRQYFAGSLKDAAKSIGVCPTTLKRICRQHGITRWPSRKIKKVGHSLRKLQLVIDSVQGAEGAIQIG  
SFYTSFPELSANGVSESPKINSDNSKFYSENGVKATFGDEKIRFSLQPNCGFRDLQMEIARRFNLKEMSKIQVKYL  
DDAQEWVLLTCDADLEECKDINRSSQSRTVRLFLFHASPLNHSTNAFGSTSPT
