# Supplementary material for: Genome-Wide Identification, Characterization, and Regulation of RWP-RK Gene Family in the Nitrogen-Fixing Clade
Source: MDPI journal article supplement (doi:10.3390/plants9091178), 2020-09-11
Supplement: s1 [file s1]

| Motif | Consensus sequence                      | Found in subfamily     |
|-------|-----------------------------------------|------------------------|
| 1     | VLQQYFAGSJKDAAKSJGVCPTTLKRICRZH         | ALL                    |
| 2     | GQGLPGRAFQSKVPEFTPBVTYYSKTEYPLVHHAR     | NLP(NLP-1,NLP-2,NLP-3) |
| 3     | GISRWPSRKIKKVNRSJKKLQ                   | ALL                    |
| 4     | NYQAALAEILEVLRVCETHRLPLAQTWIPC          | NLP(NLP-1,NLP-2,NLP-3) |
| 5     | GTFDJKYLDDEEWVLLTCDADLZECIDI            | NLP(NLP-1,NLP-2,NLP-3) |
| 6     | CLSTVESACYVNDAAHVWGFHEACSEHHLQ          | NLP(NLP-1,NLP-2,NLP-3) |
| 7     | MFGLNAAVAIRLRSTYTGDDDYVL                | NLP(NLP-1,NLP-2,NLP-3) |
| 8     | EGSKVRVKATYGEDKIRFRDPSWGCVELYEEVAKRFLZD | NLP(NLP-1,NLP-2,NLP-3) |
| 9     | PVFEPSSQSCLGVLELVMTSZKINYAPELEKVC       | NLP(NLP-1,NLP-2,NLP-3) |
| 10    | EEMPDLZLEDETKRLRQACFKANYKKRRL           | RKD(RKD-1,RKD-2)       |
| 11    | VIDSVQGAEGAFQIDSFYGSF                   | NLP(NLP-1,NLP-2,NLP-3) |
| 12    | EEQKLLNLSLQATMQRHCRSL                   | NLP(NLP-1,NLP-2,NLP-3) |
| 13    | GQGVLAQVWVPVKNNGNRYVLTSEQPF             | NLP(NLP-1,NLP-2,NLP-3) |
| 14    | KGSRKQGEKKRTKAECTISLS                   | NLP(NLP-1,NLP-2,NLP-3) |
| 15    | SNGLAQYREVSRYMYTFSAEGE                  | NLP(NLP-1,NLP-2,NLP-3) |
| 16    | PGPYSSVKERMLRALRYFKES                   | NLP(NLP-1,NLP-2,NLP-3) |
| 17    | KALZAVBLRSSEILR                         | NLP(NLP-1,NLP-2,NLP-3) |
| 18    | TELQEPFGGMLIEDAGSSKDLRLNLCPSVA          | NLP(NLP-2)             |
| 19    | EFFLPVBCTDS                             | NLP(NLP-1,NLP-2,NLP-3) |
| 20    | SSGSNIIRLLVHDIPSNLGSS                   | NLP(NLP-2,NLP-3)       |
| 21    | VLAHGGGLKKSCSSFDGSCMG                   | NLP(NLP-2)             |
| 22    | PGLPGRVFISKVPEWTSNMGYYSKTEYLR           | NLP(NLP-1,NLP-2,NLP-3) |
| 23    | HNHPTSSSMTDSSNGSGSMMHGSSSGSQS           | NLP(NLP-3)             |
| 24    | MDFDYMDLELLDGCWLETT                     | NLP(NLP-1)             |
| 25    | SGSSEDSTNPTSHGSGCHGSPNNESSPVKD          | NLP(NLP-2)             |
| 26    | GEESEEKLRBAIEILEKEKKL                   | RKD(RKD-2)             |
| 27    | IQQGKEGCRHSDDNY                         | NLP(NLP-1)             |
| 28    | YNVRGSJA                                | NLP(NLP-1,NLP-2,NLP-3) |
| 29    | PKGKGIGYWTSPGAQLEGSTSLDGGIKNS           | NLP(NLP-3)             |
| 30    | RTVSDAELEGIEGSQ                         | NLP(NLP-1, NLP-3)      |
| 31    | NNVEPPQQNQTPPNNQDVRLCS                  | RKD(RKD-3) (2)         |
| 32    | RSSZSRTIKLSLQQS                         | NLP(NLP-1)             |
| 33    | LFSTSSDQPFSLWAFSDGED                    | NLP(NLP-2)             |
| 34    | FILQDPLSAFYALCTGLDWDE                   | RKD(RKD-3)             |
| 35    | GRRWWIGPRAN                             | NLP(NLP-1)             |
| 36    | YKNGVWLCIFAFHADHTPQFSRIPSLLLVTR         | RKD(RKD-1)             |
| 37    | WPPPPVPFSCSCCQVLREI                     | RKD(RKD-3)             |
| 38    | DMFNNFSELMNFDYAG                        | NLP(NLP-3)             |
| 39    | GASKSPSSSCSQSSSSSHSCS                   | NLP(NLP-1)             |
| 40    | KAAAMAVAKRQKMLESEKENI                   | RKD(RKD-1)             |
| 41    | NGFQFEKLEIHGRLGLISHAI                   | RKD(RKD-3)             |
| 42    | IAAGVELEESSVEJIEASNER                   | ALL                    |
| 43    | NKBMLIQIWVPVRRG                         | NLP(NLP-1)             |

---

|    |                                            |            |
|----|--------------------------------------------|------------|
| 44 | EAILEDMVPEACGTNPPGPD LAPKQSMGTLNKTVTPFAARK | NLP(NLP-2) |
| 45 | LASP NLSGTSLFSTLKQSDNP                     | NLP(NLP-1) |
| 46 | HDWTQQFSYSSNQLCFNEFPDLENFBFDF              | RKD(RKD-1) |
| 47 | FENQKHSKVKSTCVD                            | NLP(NLP-3) |
| 48 | KLLPRSQSQETLGEHPKTEYH                      | NLP(NLP-1) |
| 49 | GLTBEVAMLEKHKRL                            | RKD(RKD-1) |
| 50 | VHSRLESIPITQSAKSPRPD                       | NLP(NLP-2) |

---
