# Supplementary material for: Genome-Wide Identification, Characterization, and Regulation of RWP-RK Gene Family in the Nitrogen-Fixing Clade
Source: MDPI journal article supplement (doi:10.3390/plants9091178), 2020-09-11
Supplement: s1 [file s1]

A

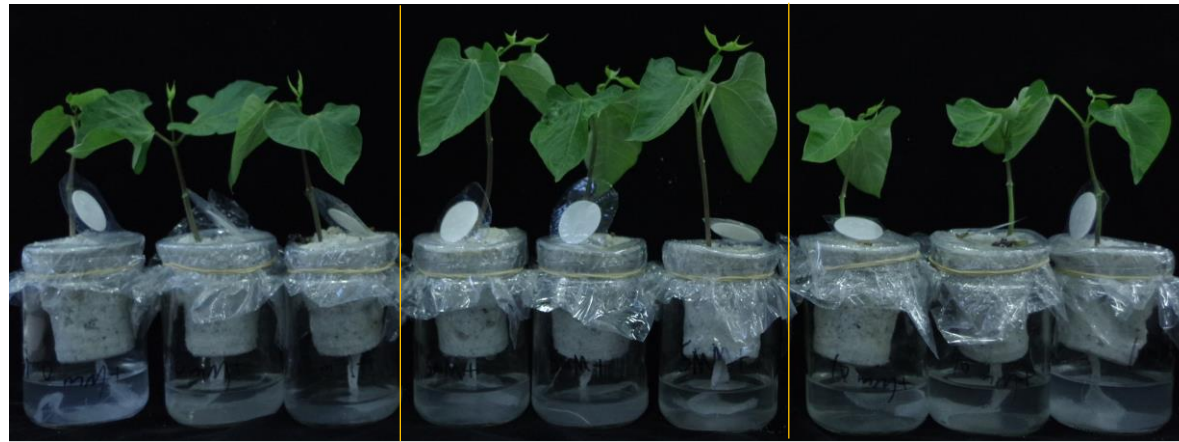

0mM

5mM

10mM

Plants at 7 day after inoculation

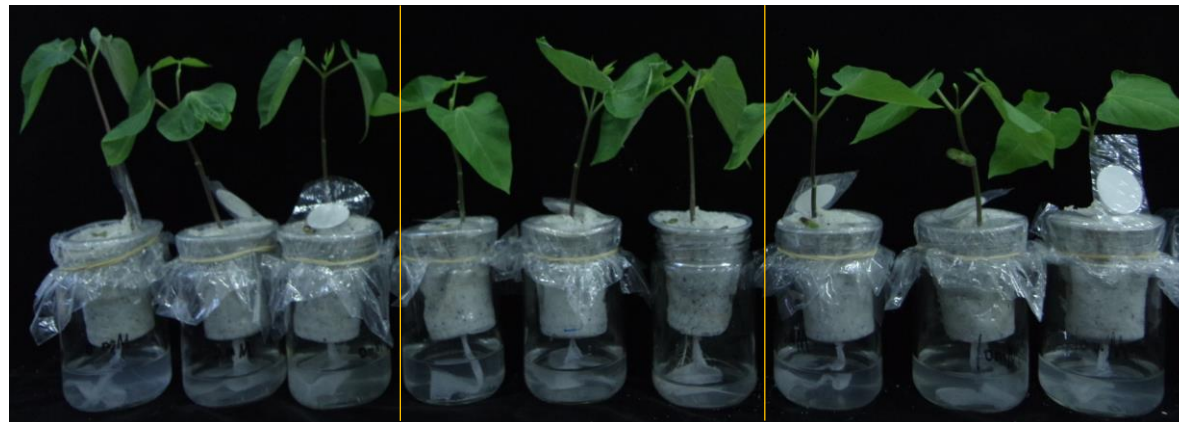

0mM

5mM

10mM

Plants at 7 day after uninoculation

B

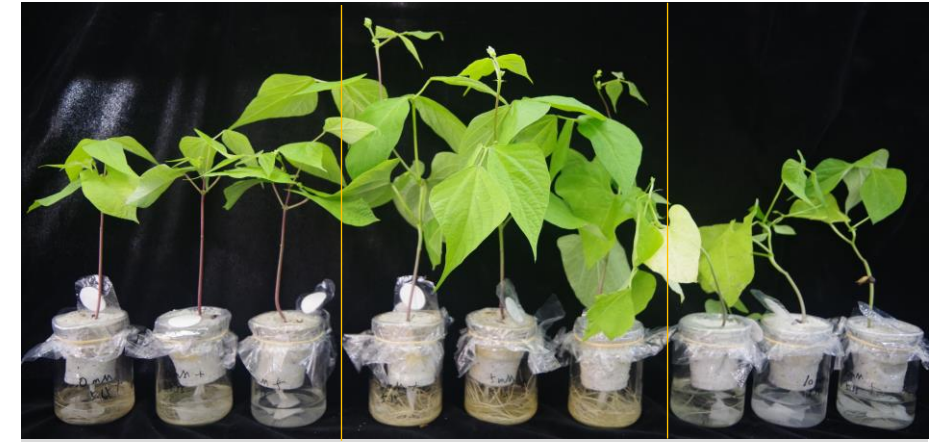

0mM

5mM

10mM

Plants at 21 day after inoculation

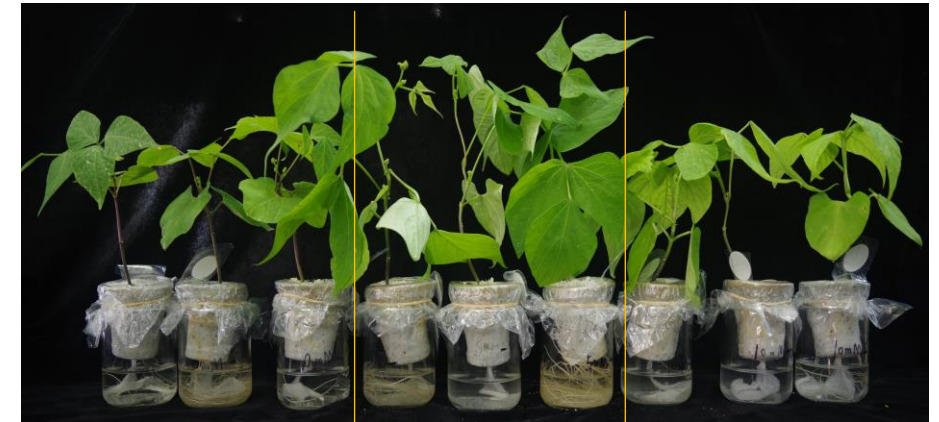

0mM

5mM

10mM

Plants at 21 day after uninoculation
