# Supplementary material for: Genome-Wide Identification, Characterization, and Regulation of RWP-RK Gene Family in the Nitrogen-Fixing Clade
Source: MDPI journal article supplement (doi:10.3390/plants9091178), 2020-09-11
Supplement: s1 [file s1]

| Identity                             | 102030405060708090                          |  |  |  |  |  |  |  |  |  | 102030405060708090                                      |  |  |  |  |  |  |  |  |  |
|--------------------------------------|---------------------------------------------|--|--|--|--|--|--|--|--|--|---------------------------------------------------------|--|--|--|--|--|--|--|--|--|
|                                      | SILSLVILQQVYVAGSLKDAAKS                     |  |  |  |  |  |  |  |  |  | VCPITTKKRLCRQHGLSRWPSRKIKVM                             |  |  |  |  |  |  |  |  |  |
| 1. Alnus glutinosa,Alngl10019512742  | E L D E I T Q R R E I N V P I T K A A K E   |  |  |  |  |  |  |  |  |  | V G L T V L K K R C R E L N I M R W P H R K I K S I K   |  |  |  |  |  |  |  |  |  |
| 2. Alnus glutinosa,Alngl10067512813  | S I F D H I S N Y F A L P I N D A A S N     |  |  |  |  |  |  |  |  |  | V C T S V L K K I C R D N G L D W P Y R K F M S - G     |  |  |  |  |  |  |  |  |  |
| 3. Alnus glutinosa,Alngl26612540027  | S I L E V I L Q Q V Y A G S L K D A A K S   |  |  |  |  |  |  |  |  |  | V C P I T T M K R I C R Q H G I S R W P S R K I K M V N |  |  |  |  |  |  |  |  |  |
| 4. Alnus glutinosa,Alngl424567527630 | S I L P V I L R Q V Y A G S L K D A A K S   |  |  |  |  |  |  |  |  |  | V C P I T T K R I C R Q H G I T R W P S R K I K K V G   |  |  |  |  |  |  |  |  |  |
| 5. Alnus glutinosa,Alngl4587530137   | S I K K A I I S Q V Y M P I T Q A A K E     |  |  |  |  |  |  |  |  |  | V G L I L L K K R S R E L G I T R W P H R K I M S I Q   |  |  |  |  |  |  |  |  |  |
| 6. Alnus glutinosa,Alngl46270510821  | S I K K A I I S Q V Y M P I T Q A A K E     |  |  |  |  |  |  |  |  |  | V G L I L L K K R S R E L G I T R W P H R K I M S I Q   |  |  |  |  |  |  |  |  |  |
| 7. Alnus glutinosa,Alngl55731532319  | A L P D I L A K V E D L P I I V E A S R N   |  |  |  |  |  |  |  |  |  | V G L I L L K K R S R E L G I T R W P H R K I M S I Q   |  |  |  |  |  |  |  |  |  |
| 8. Alnus glutinosa,Alngl6212505326   | I L L E I V M G R N F H L P I I E A S R N   |  |  |  |  |  |  |  |  |  | I C P I T V M K K I C R K E G I S R W P Y R K I K S T   |  |  |  |  |  |  |  |  |  |
| 9. Alnus glutinosa,Alngl7222505734   | V S I L S V I L Q Q V Y S G S L K D A A K S |  |  |  |  |  |  |  |  |  | V C P I T T K R I C R Q H G I S R W P S R K I K M V N   |  |  |  |  |  |  |  |  |  |
| 10. Alnus glutinosa,Alngl764535691   | I L L E V I L K Q V Y S G S L K D A A R S   |  |  |  |  |  |  |  |  |  | V C P I T T K R I C R Q H G I S R W P S R K I K M V G   |  |  |  |  |  |  |  |  |  |
| 11. Arachis duranensis,Aradu.0768L   | E L D I L V I K K I E D V P I I T E A S R N |  |  |  |  |  |  |  |  |  | I G L I L V K K R C R E L S I T R W P H R K I K S I D   |  |  |  |  |  |  |  |  |  |
| 12. Arachis duranensis,Aradu.1V686   | Y E D I E I K K I E F V P I I T E A S K     |  |  |  |  |  |  |  |  |  | V C P I T T K R I C R Q H G I S R W P S R K I K M V N   |  |  |  |  |  |  |  |  |  |
| 13. Arachis duranensis,Aradu.76M2Y   | S I L P V I L R Q V Y A G S L K D A A K S   |  |  |  |  |  |  |  |  |  | V C T I T T K R I C R Q H G I S R W P S R K I K M V G   |  |  |  |  |  |  |  |  |  |
| 14. Arachis duranensis,Aradu.76Z53   | I L L Q V I L R Q I E F A G S L K D A A K N |  |  |  |  |  |  |  |  |  | V C T I T T K R I C R Q H G I S R W P S R K I K M V G   |  |  |  |  |  |  |  |  |  |
| 15. Arachis duranensis,Aradu.BK253   | S I L S V I L Q Q V Y S G S L K D A A K N   |  |  |  |  |  |  |  |  |  | V C P I T T K R I C R Q H G I S R W P S R K I K M V N   |  |  |  |  |  |  |  |  |  |
| 16. Arachis duranensis,Aradu.G4S83   | S I L S V I L Q Q V Y S G S L K D A A K S   |  |  |  |  |  |  |  |  |  | V C P I T T K R I C R Q H G I S R W P S R K I K M V N   |  |  |  |  |  |  |  |  |  |
| 17. Arachis duranensis,Aradu.H6JXR   | S I L S V I L Q Q I E S G T L K D A A R S   |  |  |  |  |  |  |  |  |  | V C P I T T K R I C R K Q C I S R W P S R K I K V N     |  |  |  |  |  |  |  |  |  |
| 18. Arachis duranensis,Aradu.I1BME   |                                             |  |  |  |  |  |  |  |  |  | I L S I L K R C R E L S I N R W P H R K I K S I Q       |  |  |  |  |  |  |  |  |  |
| 19. Arachis duranensis,Aradu.N7C89   | S R K M I I S D Y Y M P I T Q A A K E       |  |  |  |  |  |  |  |  |  | V G L I L L K K R C R E L G I T R W P H R K I M S I Q   |  |  |  |  |  |  |  |  |  |
| 20. Arachis duranensis,Aradu.R5Y89   | S R K M I I S E Y Y M P I T Q A A K E       |  |  |  |  |  |  |  |  |  | V G L I L L K K R C R E L G I T R W P H R K I M S I Q   |  |  |  |  |  |  |  |  |  |
| 21. Arachis duranensis,Aradu.T4VL    | S I L E V I L Q R Y V A G S L K D A A K S   |  |  |  |  |  |  |  |  |  | V C P I T T M K R I C R Q H G I S R W P S R K I K M V N |  |  |  |  |  |  |  |  |  |
| 22. Arachis duranensis,Aradu.TED1R   | S I L S V I L Q Q V Y S G S L K D A A K S   |  |  |  |  |  |  |  |  |  | V C P I T T K R I C R Q H G I S R W P S R K I K M V N   |  |  |  |  |  |  |  |  |  |
| 23. Arachis duranensis,Aradu.TG0QF   |                                             |  |  |  |  |  |  |  |  |  | I G L I L F K R K R C K E L S I N H W P H R K I K S I H |  |  |  |  |  |  |  |  |  |
| 24. Arachis duranensis,Aradu.W5BH1   | K L D D F A P Y H F P I I E A S R O         |  |  |  |  |  |  |  |  |  | I C P I T V M K K I C R K E G I S R W P Y R K I K S T   |  |  |  |  |  |  |  |  |  |
| 25. Arachis duranensis,Aradu.YRC2R   | S I L E V I L Q R Y V S G S L K D A A K S   |  |  |  |  |  |  |  |  |  | V C P I T T K R I C R Q H G I S R W P S R K I K M V N   |  |  |  |  |  |  |  |  |  |
| 26. Arachis ipaensis,Araip.377BK     | V S I L S V I L Q Q V Y S G S L K D A A K S |  |  |  |  |  |  |  |  |  | V C P I T T R K R I C R Q H G I A R W P S R K I K M V N |  |  |  |  |  |  |  |  |  |
| 27. Arachis ipaensis,Araip.38X6K     | S I L P V I L R Q V Y A G S L K D A A K S   |  |  |  |  |  |  |  |  |  | V C P I T T K R I C R Q H G I T R W P S R K I K K V G   |  |  |  |  |  |  |  |  |  |
| 28. Arachis ipaensis,Araip.5C6JK     | V S I L S V I L Q Q V Y S G S L K D A A K S |  |  |  |  |  |  |  |  |  | V C P I T T K R I C R Q H G I A R W P S R K I K M V N   |  |  |  |  |  |  |  |  |  |
| 29. Arachis ipaensis,Araip.6M6N8     | K R K S I I S E C I Y M P I I A E A S H     |  |  |  |  |  |  |  |  |  | V G L I H I K R R W R D L G I Q R W P H R K I M S I Q   |  |  |  |  |  |  |  |  |  |
| 30. Arachis ipaensis,Araip.73BCB     | V S I L S V I L Q Q V Y S G S L K D A A K S |  |  |  |  |  |  |  |  |  | V C P I T T K R I C R Q H G I A R W P S R K I K M V N   |  |  |  |  |  |  |  |  |  |
| 31. Arachis ipaensis,Araip.80XBW     | I L L E I L E V K Y E D I P I I V E A S R N |  |  |  |  |  |  |  |  |  | V G L I L V K K R C R E F I G I R W P H R K I K S I D   |  |  |  |  |  |  |  |  |  |
| 32. Arachis ipaensis,Araip.GND3E     | I L L Q V I L R Q I E F A G S L K D A A K N |  |  |  |  |  |  |  |  |  | V C T I T T K R I C R Q H G I S R W P S R K I K M V G   |  |  |  |  |  |  |  |  |  |
| 33. Arachis ipaensis,Araip.J80SY     | K L D D F A P Y H F P I I E A S R O         |  |  |  |  |  |  |  |  |  | I C P I T V M K K I C R K E G I S R W P Y R K I K S T   |  |  |  |  |  |  |  |  |  |
| 34. Arachis ipaensis,Araip.KR88K     | A L P D I L V E Y E D V P I I V E A L R N   |  |  |  |  |  |  |  |  |  | I G L I L V K K K C R                                   |  |  |  |  |  |  |  |  |  |
| 35. Arachis ipaensis,Araip.P1CBC     | V S I L S V I L Q Q V Y S G S L K D A A K S |  |  |  |  |  |  |  |  |  | V C P I T T K R I C R Q H G I A R W P S R K I K M V N   |  |  |  |  |  |  |  |  |  |
| 36. Arachis ipaensis,Araip.R44NW     | S I L E V I L Q R Y V S G S L K D A A K S   |  |  |  |  |  |  |  |  |  | V C P I T T M K R I C R Q H G I S R W P S R K I K M V N |  |  |  |  |  |  |  |  |  |
| 37. Arachis ipaensis,Araip.RLH2R     | S I L E V I L Q Q H E S G T L K D A A R S   |  |  |  |  |  |  |  |  |  | I G L I L V K K R C R E F I G I R W P H R K I K S I D   |  |  |  |  |  |  |  |  |  |
| 38. Arachis ipaensis,Araip.VC558     | A L P D I L V K Y E D V P I I V E A S R N   |  |  |  |  |  |  |  |  |  | V G L I L L K K R C R E L G I T R W P H R K I M S I Q   |  |  |  |  |  |  |  |  |  |
| 39. Arachis ipaensis,Araip.W1UKI     | S R K M I I S E Y Y M P I T Q A A K E       |  |  |  |  |  |  |  |  |  | V G L I L L K K R C R E L G I T R W P H R K I M S I Q   |  |  |  |  |  |  |  |  |  |
| 40. Arachis ipaensis,Araip.Y4AFN     | S I L E V I L Q R Y V A G S L K D A A K S   |  |  |  |  |  |  |  |  |  | V C P I T T M K R I C R Q H G I S R W P S R K I K M V N |  |  |  |  |  |  |  |  |  |
| 41. Arachis ipaensis,Araip.YB35N     | V S I L S V I L Q Q V Y S G S L K D A A K S |  |  |  |  |  |  |  |  |  | V C P I T T K R I C R Q H G I A R W P S R K I K M V N   |  |  |  |  |  |  |  |  |  |
| 42. Arachis ipaensis,Araip.YWB61     |                                             |  |  |  |  |  |  |  |  |  | A P I T T M K R I C R Q H G I S H W P S R K I K M V N   |  |  |  |  |  |  |  |  |  |
| 43. Cajanus cajan,C.ajan.01716       | S R K I I I S Q V Y M P I T Q A A R E       |  |  |  |  |  |  |  |  |  | V G L I L L K K R C R I R L G I T R W P H R K I M S I Q |  |  |  |  |  |  |  |  |  |
| 44. Cajanus cajan,C.ajan.07275       | S I L E V I L Q R Y V A G S L K D A A K S   |  |  |  |  |  |  |  |  |  | V C P I T T M K R I C R Q H G I S R W P S R K I K M V N |  |  |  |  |  |  |  |  |  |
| 45. Cajanus cajan,C.ajan.11912       | V S I L S V I L Q Q V Y S G S L K D A A K S |  |  |  |  |  |  |  |  |  | V C P I T T K R I C R Q H G I S R W P S R K I K M V N   |  |  |  |  |  |  |  |  |  |
| 46. Cajanus cajan,C.ajan.12486       | S I L S D I L V K Y E G M P I I V E A S R N |  |  |  |  |  |  |  |  |  | V G L I L V K K R C R E F I G I R W P H R K I K S I Q   |  |  |  |  |  |  |  |  |  |
| 47. Cajanus cajan,C.ajan.13414       | V S I L S V I L Q Q V Y S G S L K D A A R H |  |  |  |  |  |  |  |  |  | V C P I T T K R I C R Q H G I S R W P S R K I K M V N   |  |  |  |  |  |  |  |  |  |
| 48. Cajanus cajan,C.ajan.16064       | S I L D I L Q H Y E T G S L K D A A K S     |  |  |  |  |  |  |  |  |  | V C P I T T M K R I C R Q H G I S R W P S R K I K M V N |  |  |  |  |  |  |  |  |  |
