# Supplementary figures and images for: Genome-Wide Identification, Characterization, and Regulation of RWP-RK Gene Family in the Nitrogen-Fixing Clade
Source: MDPI journal article supplement (doi:10.3390/plants9091178), 2020-09-11

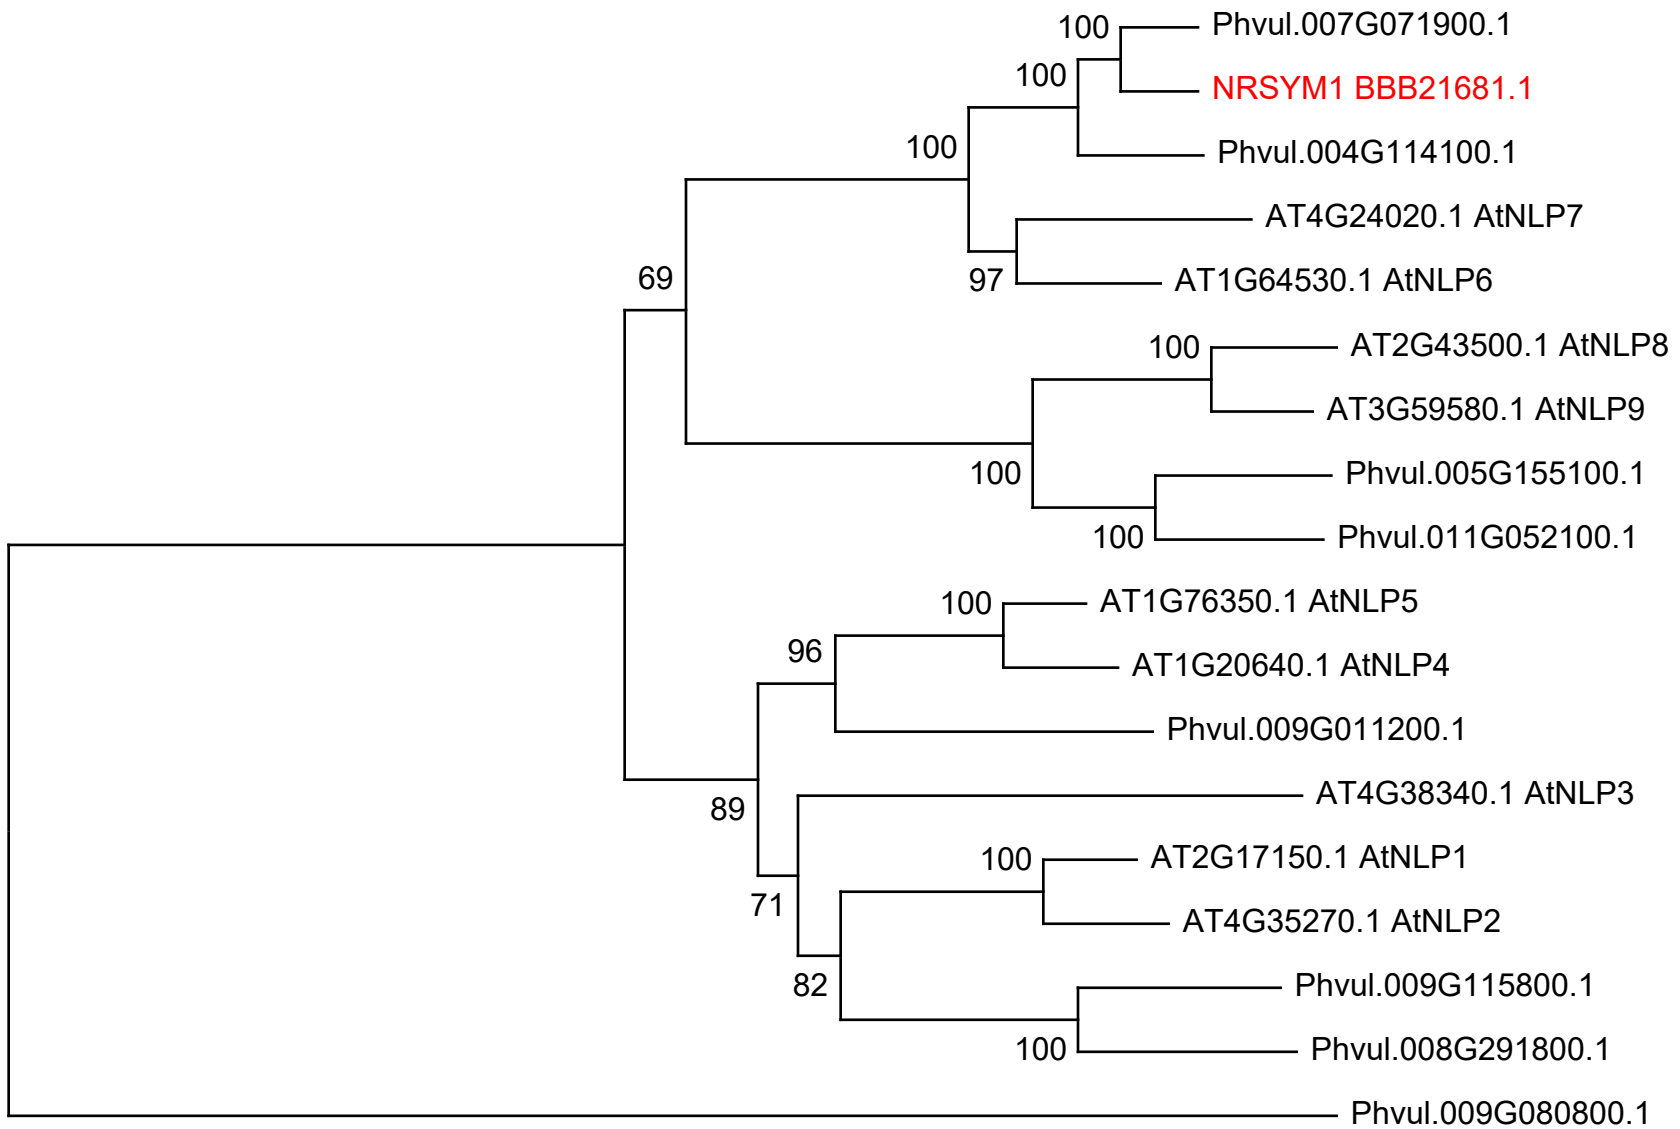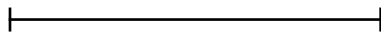

0.50

Supplement: s1 [file s1]

**A**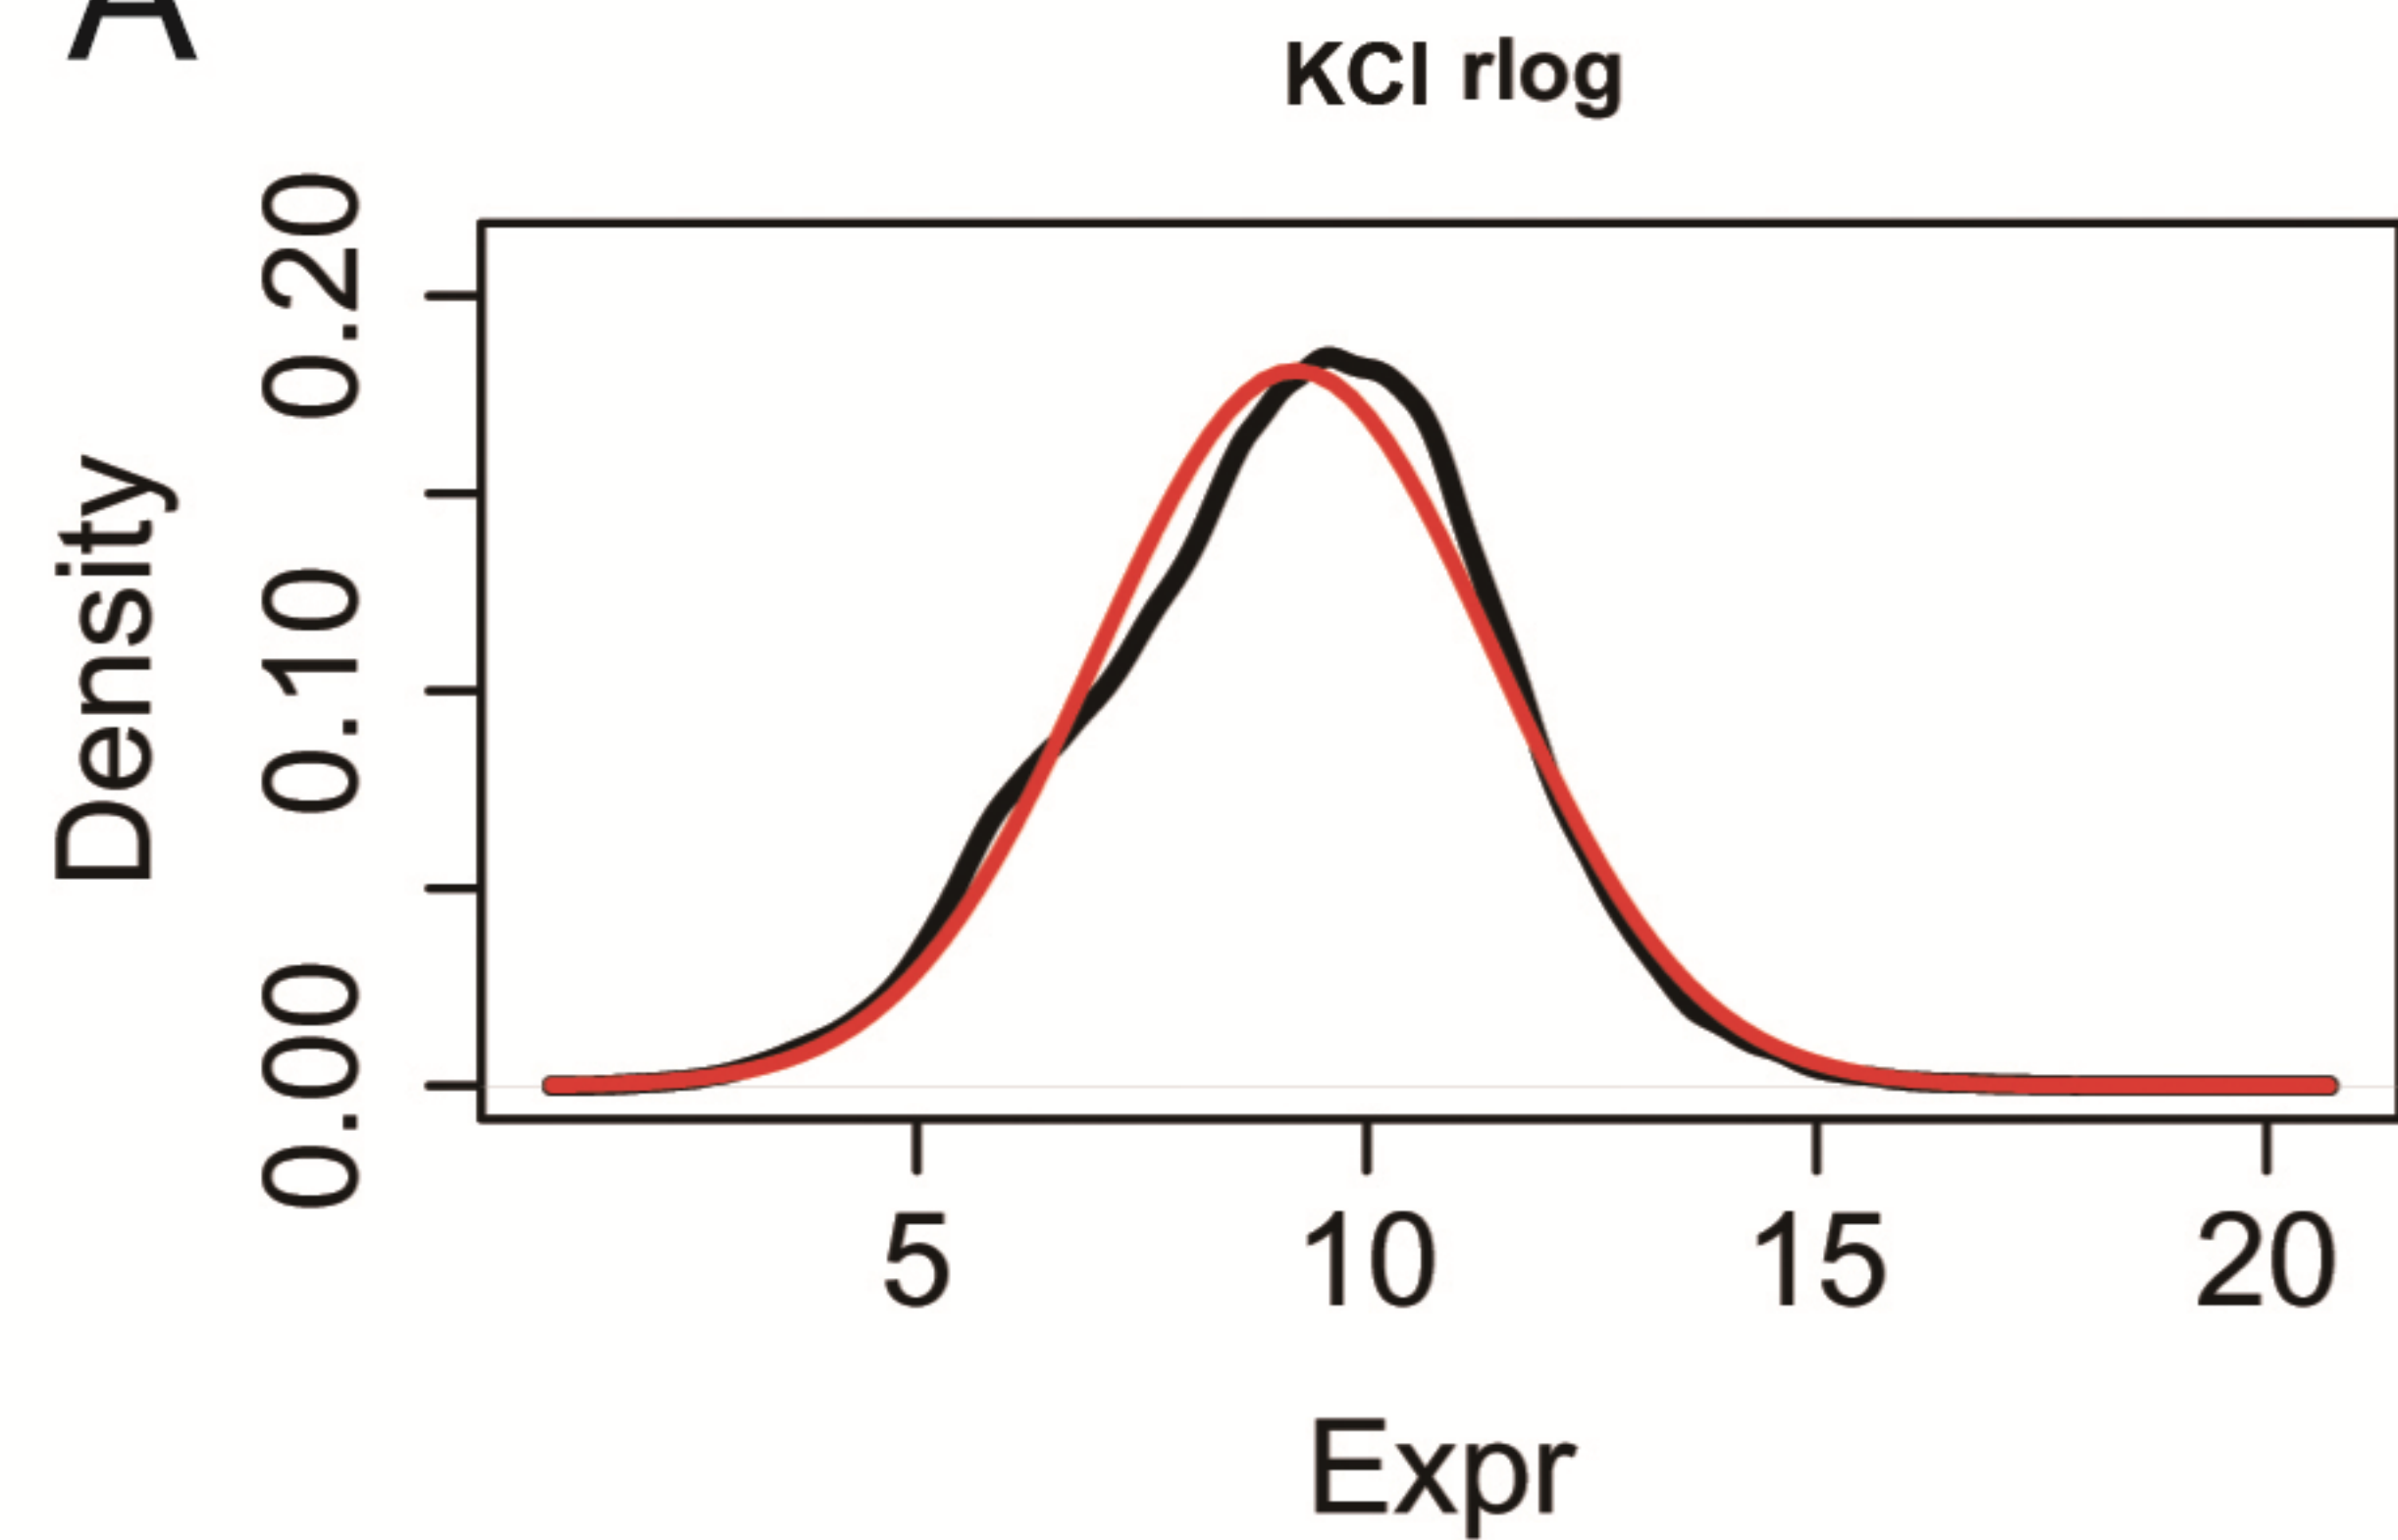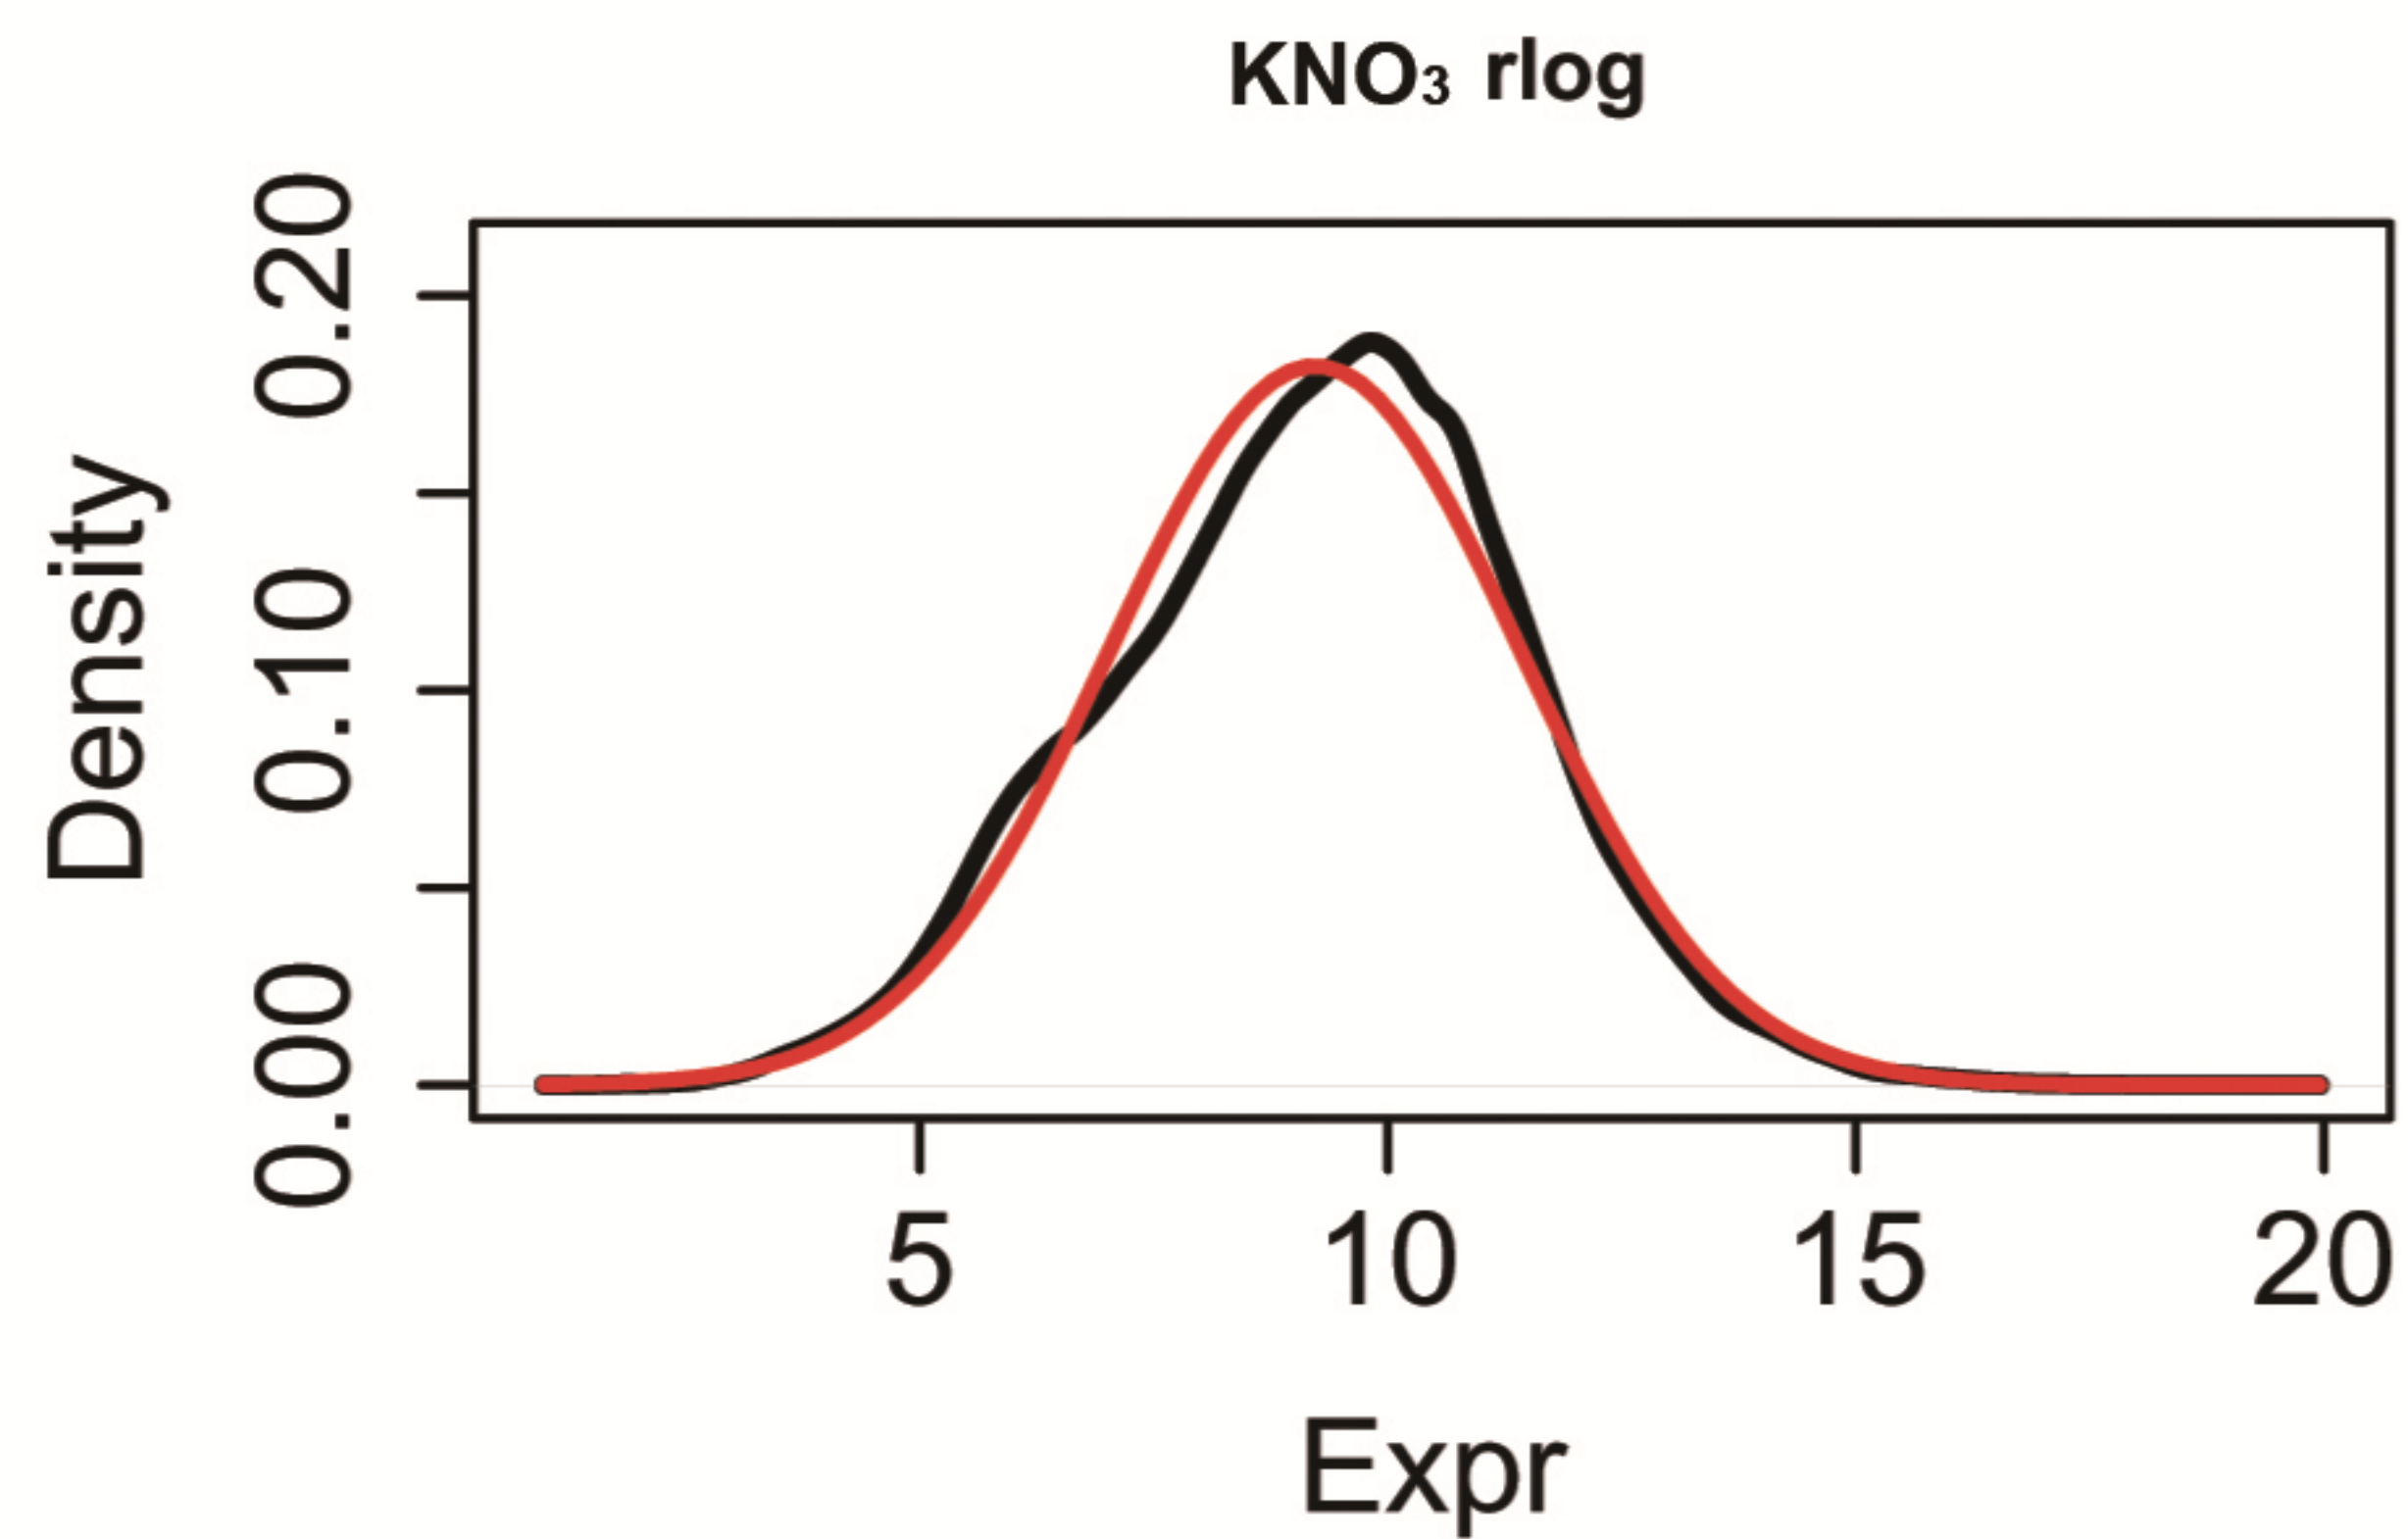**B**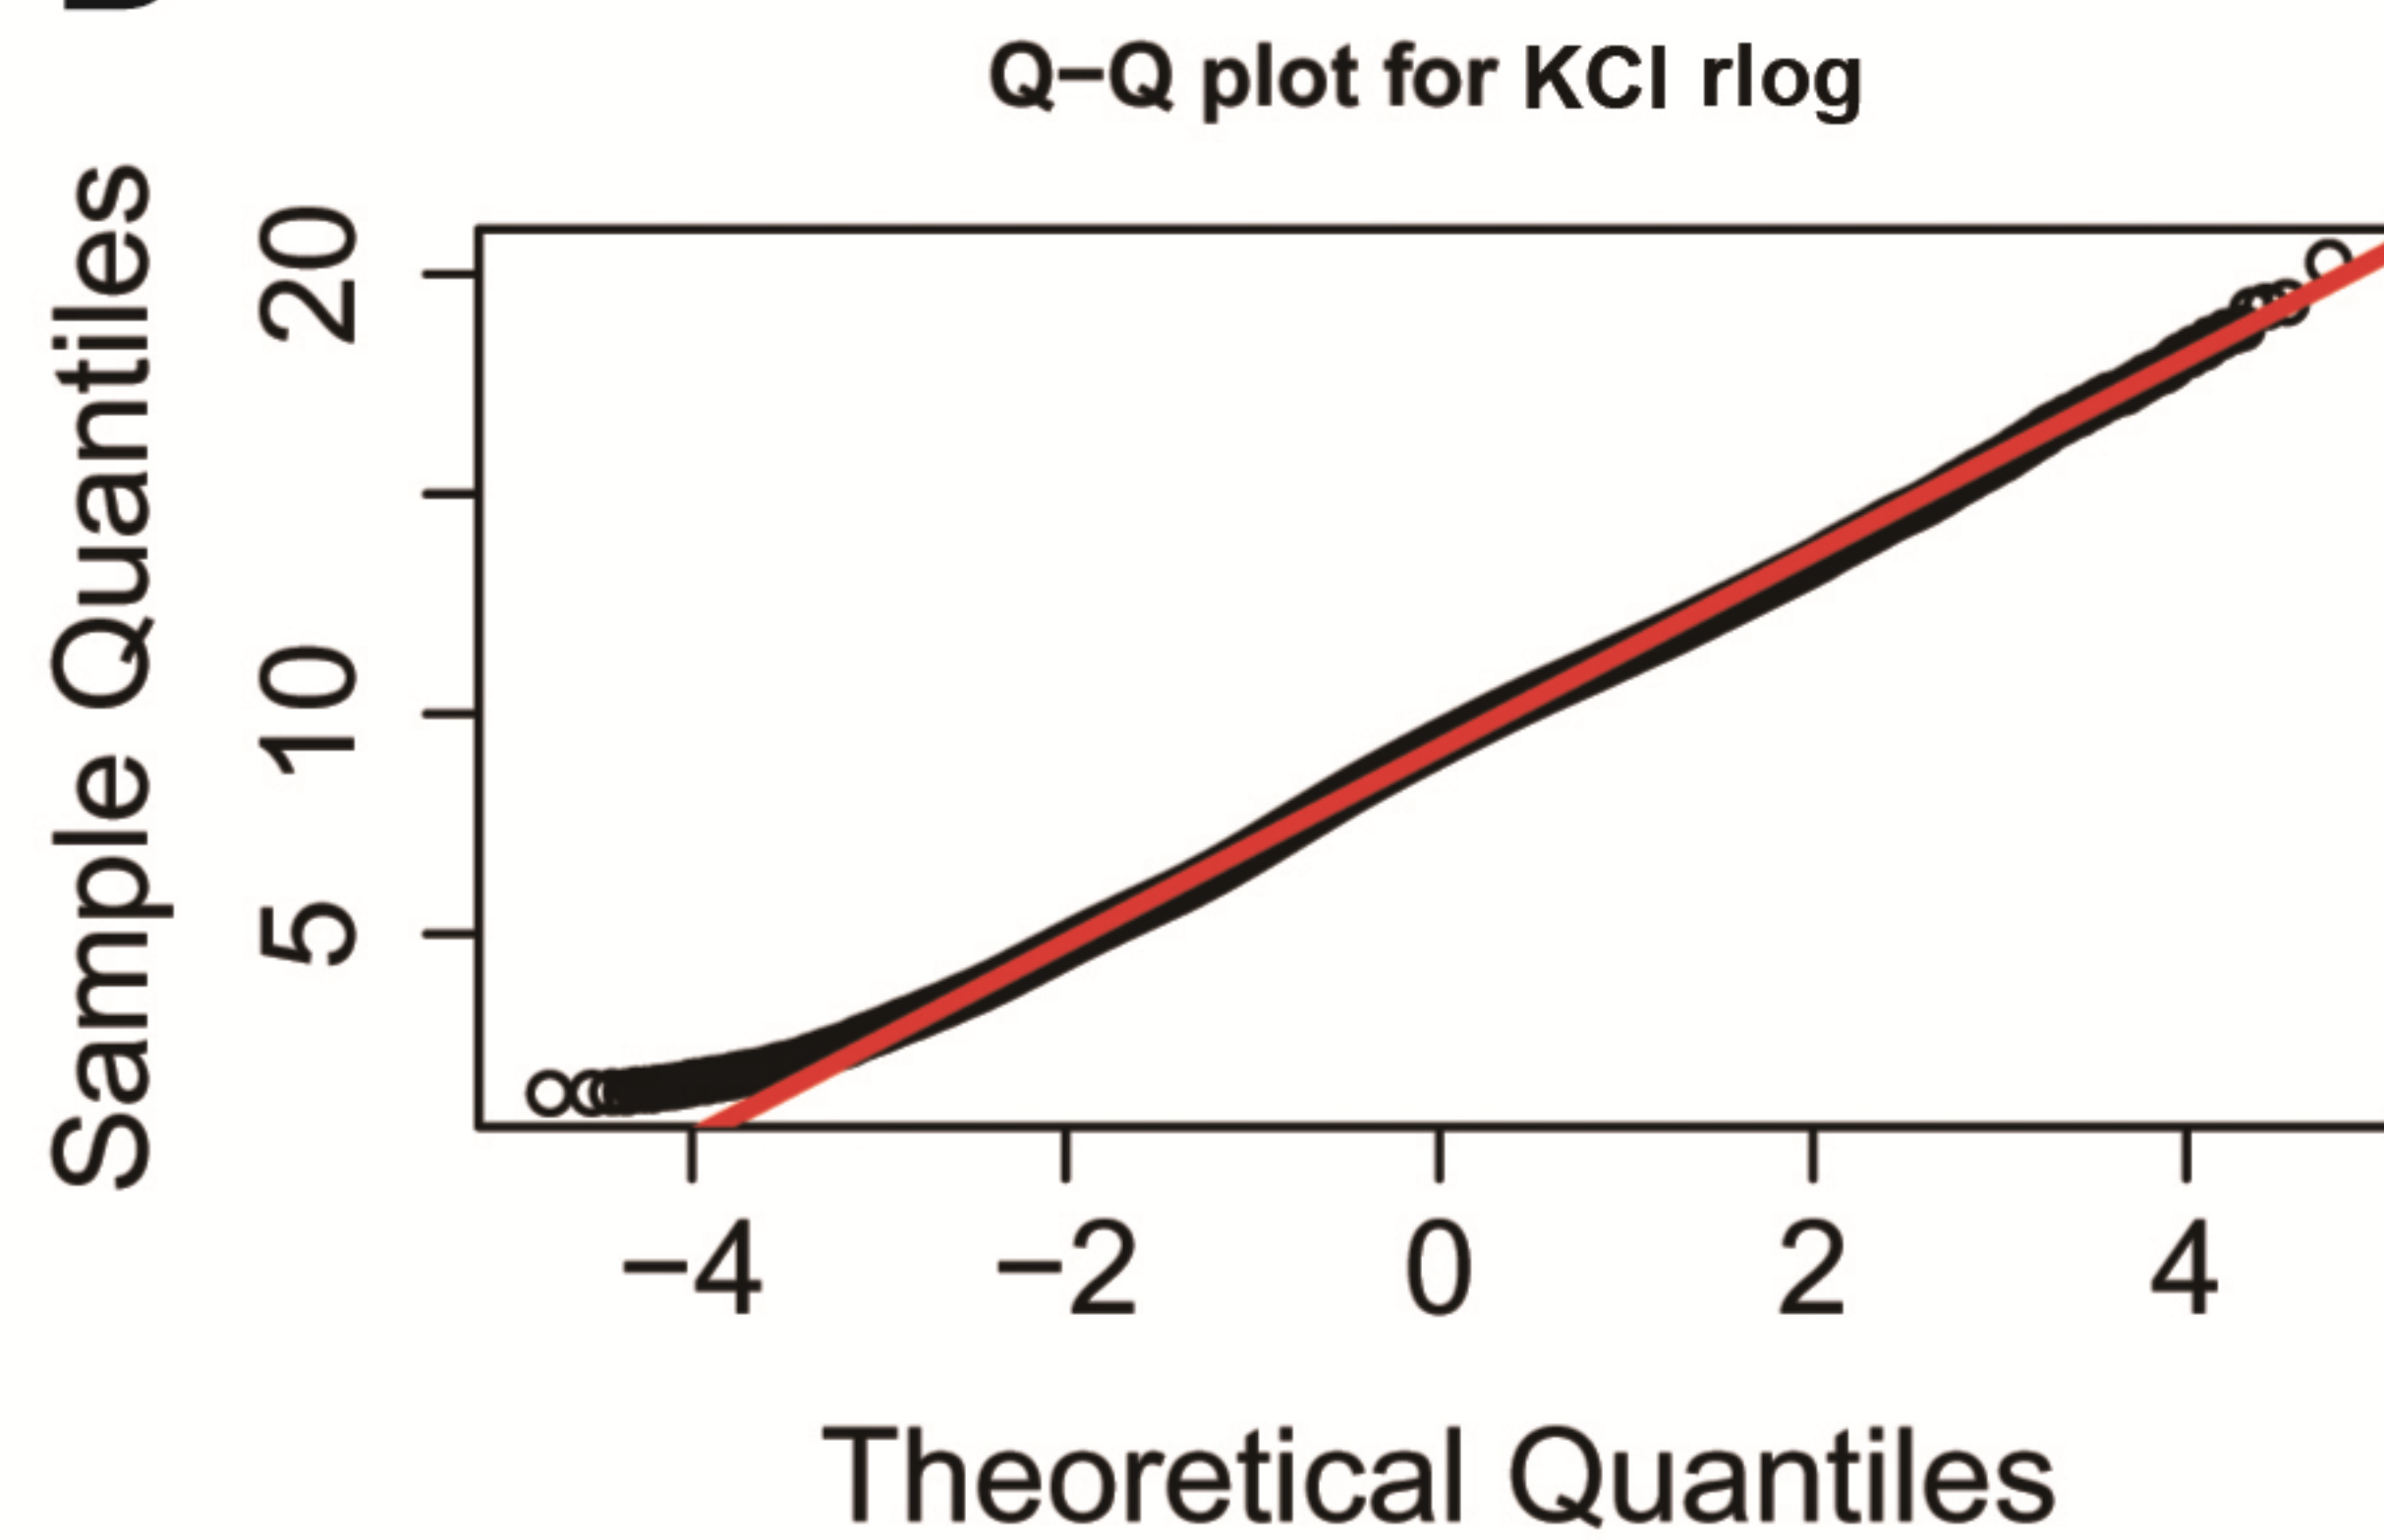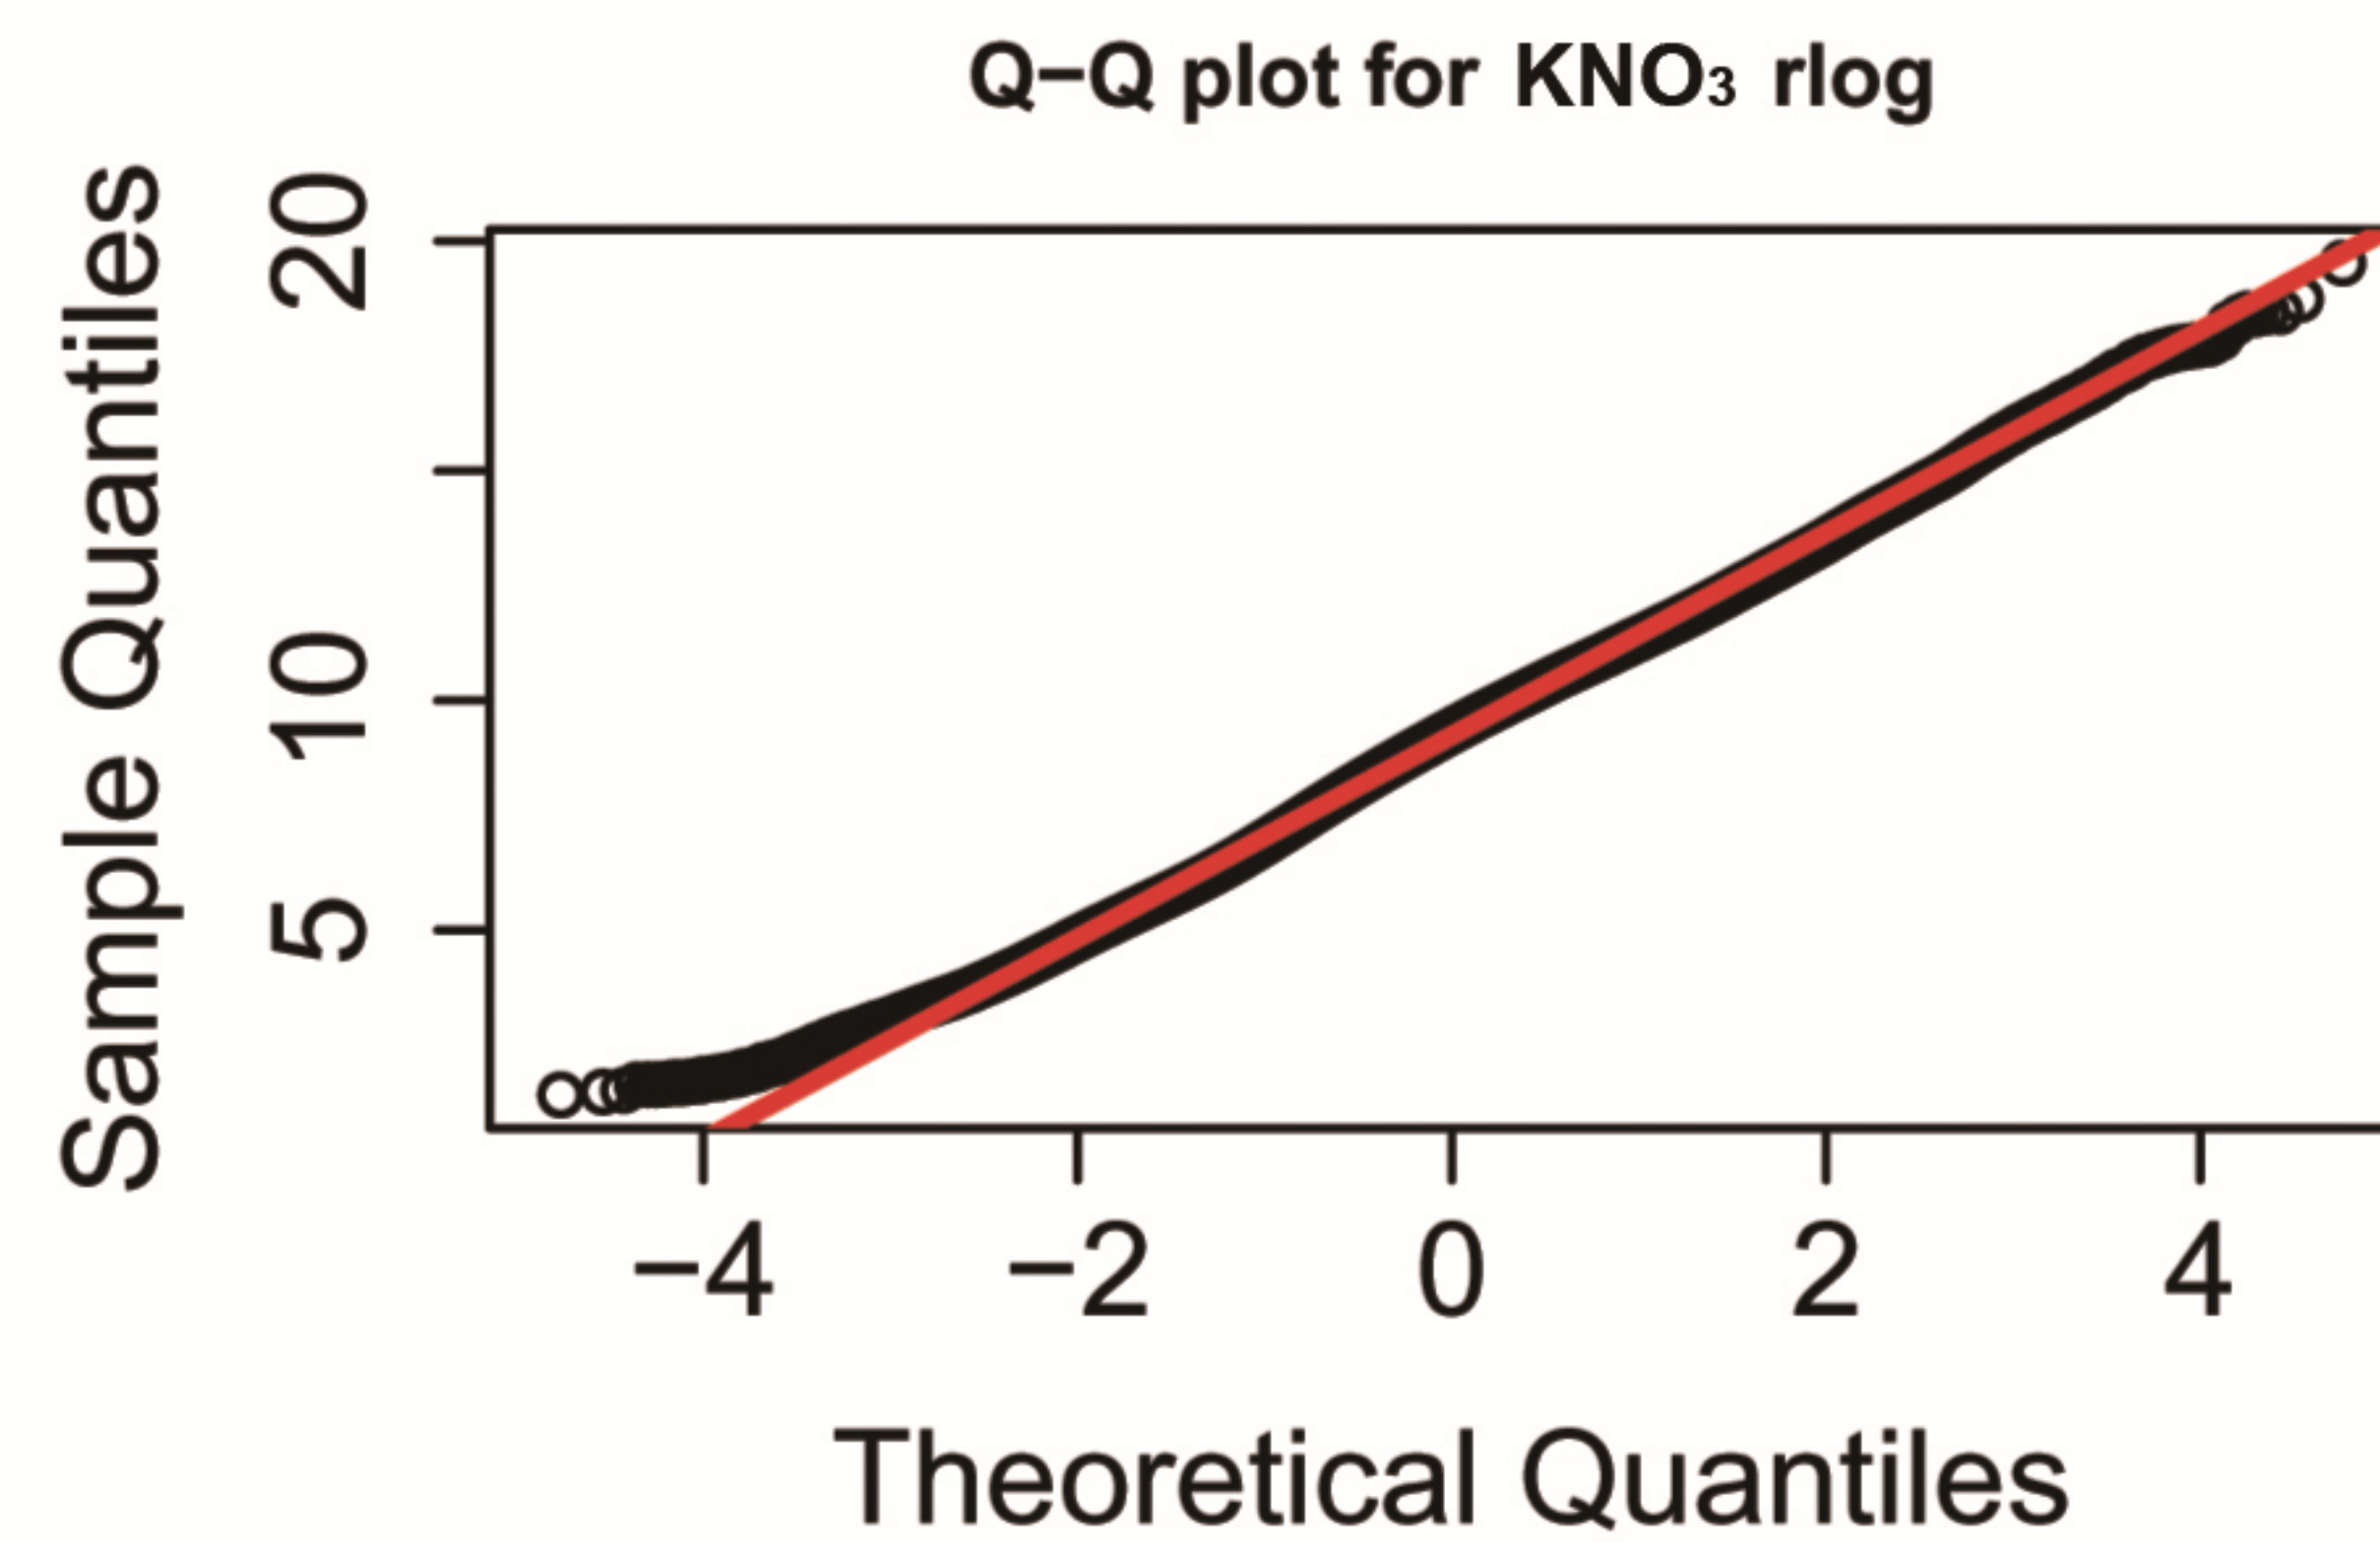

Supplement: s1 [file s1]

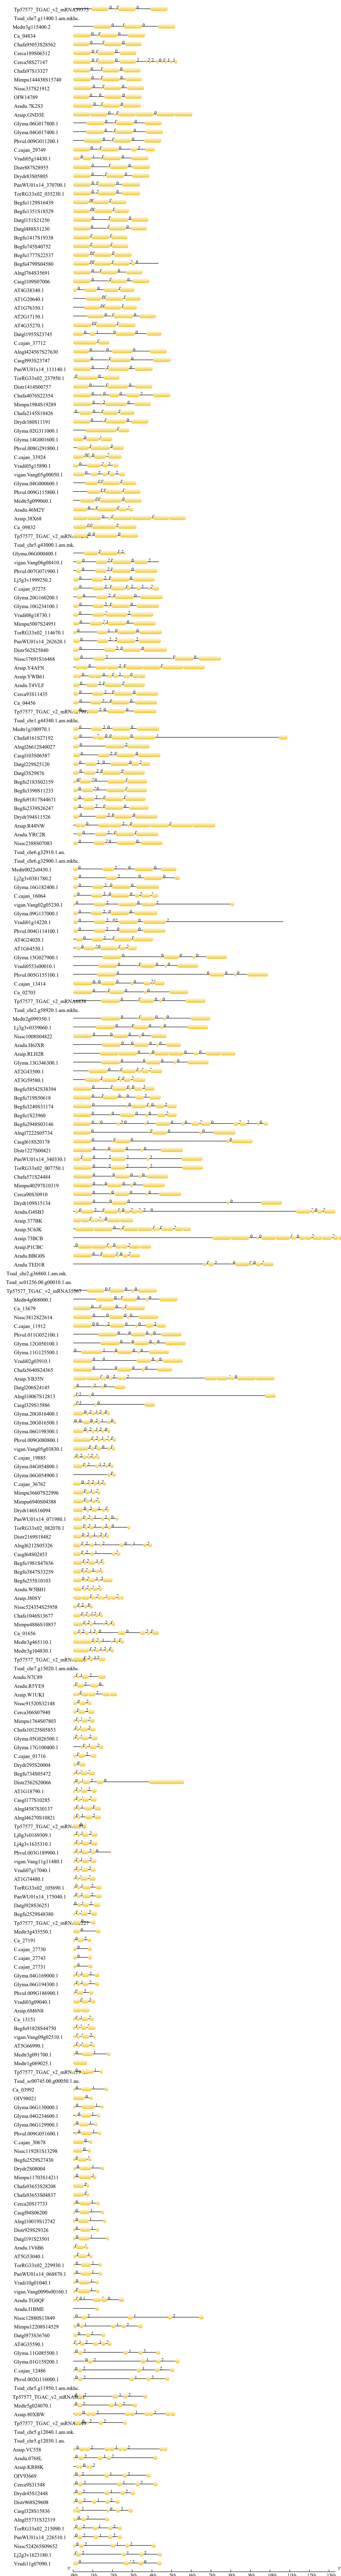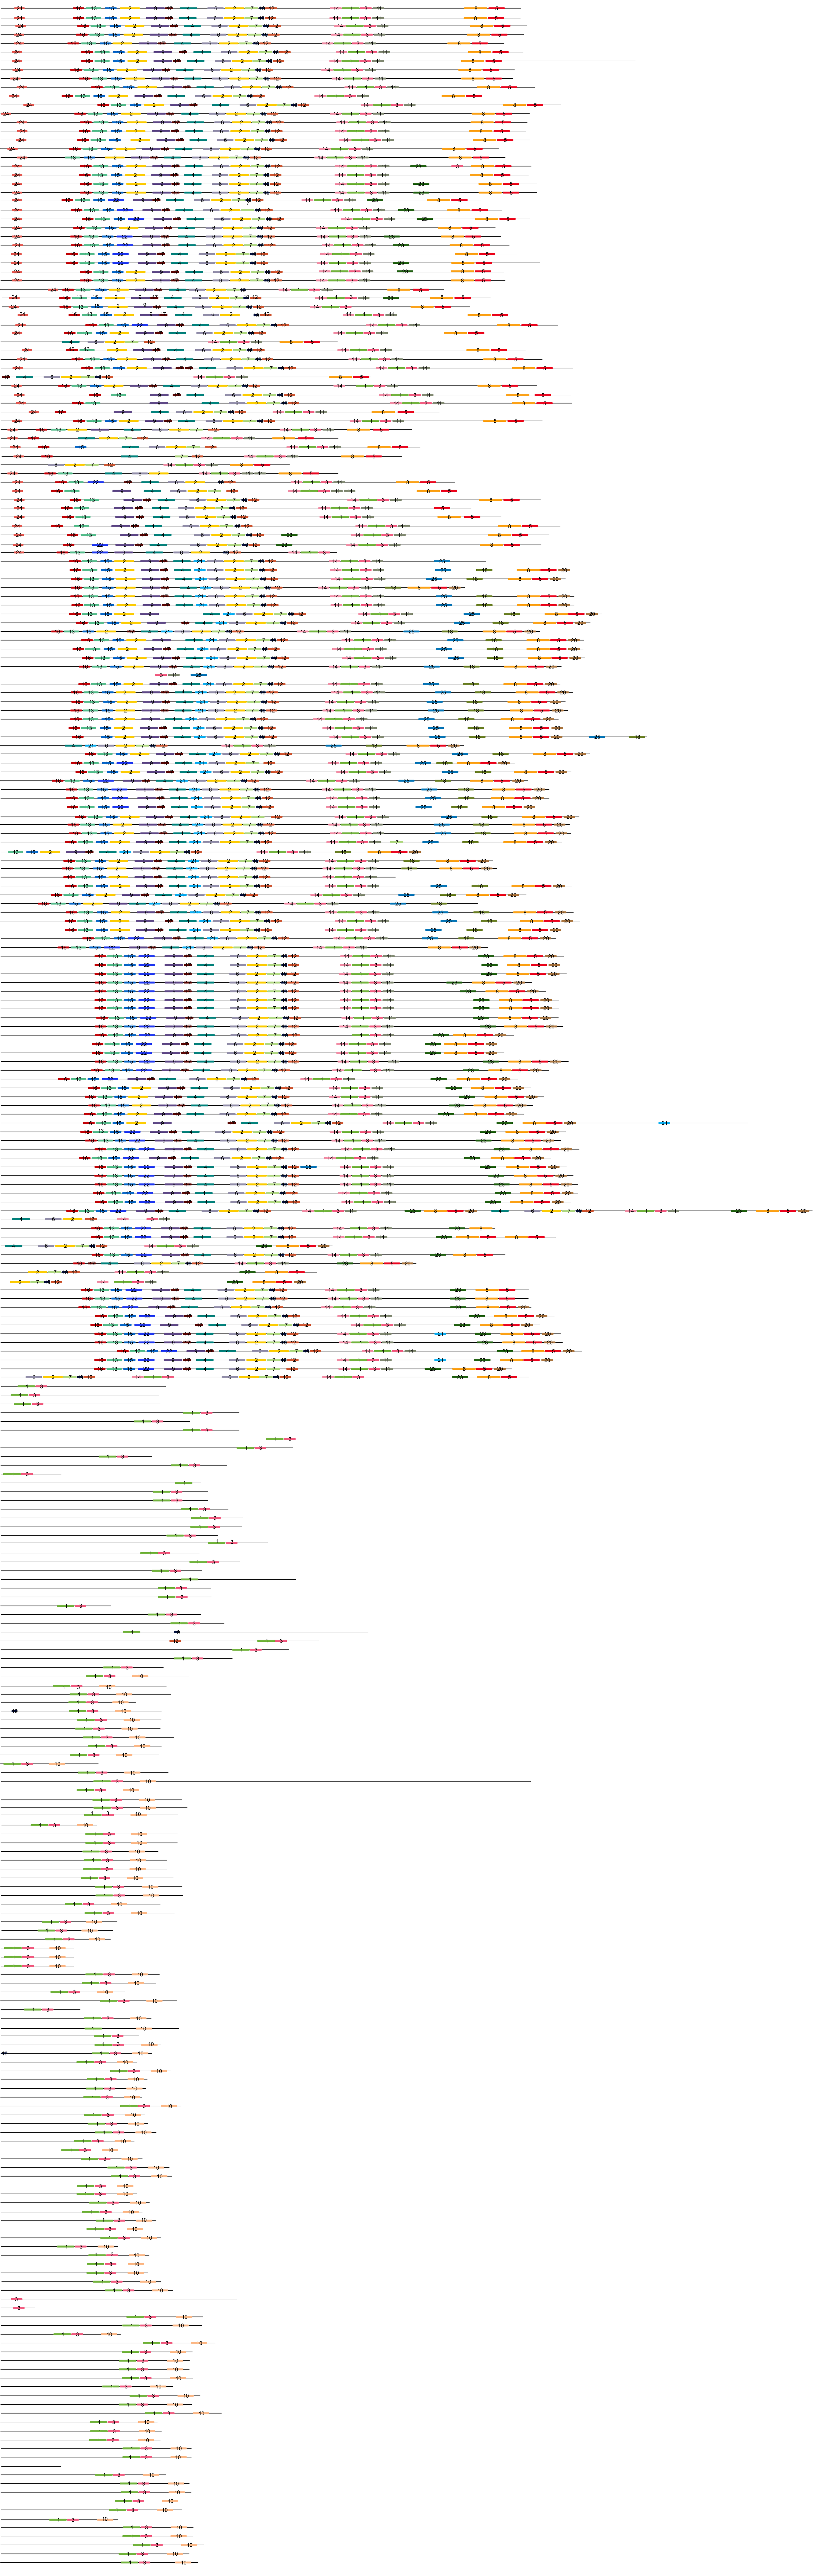

Supplement: s1 [file s1]

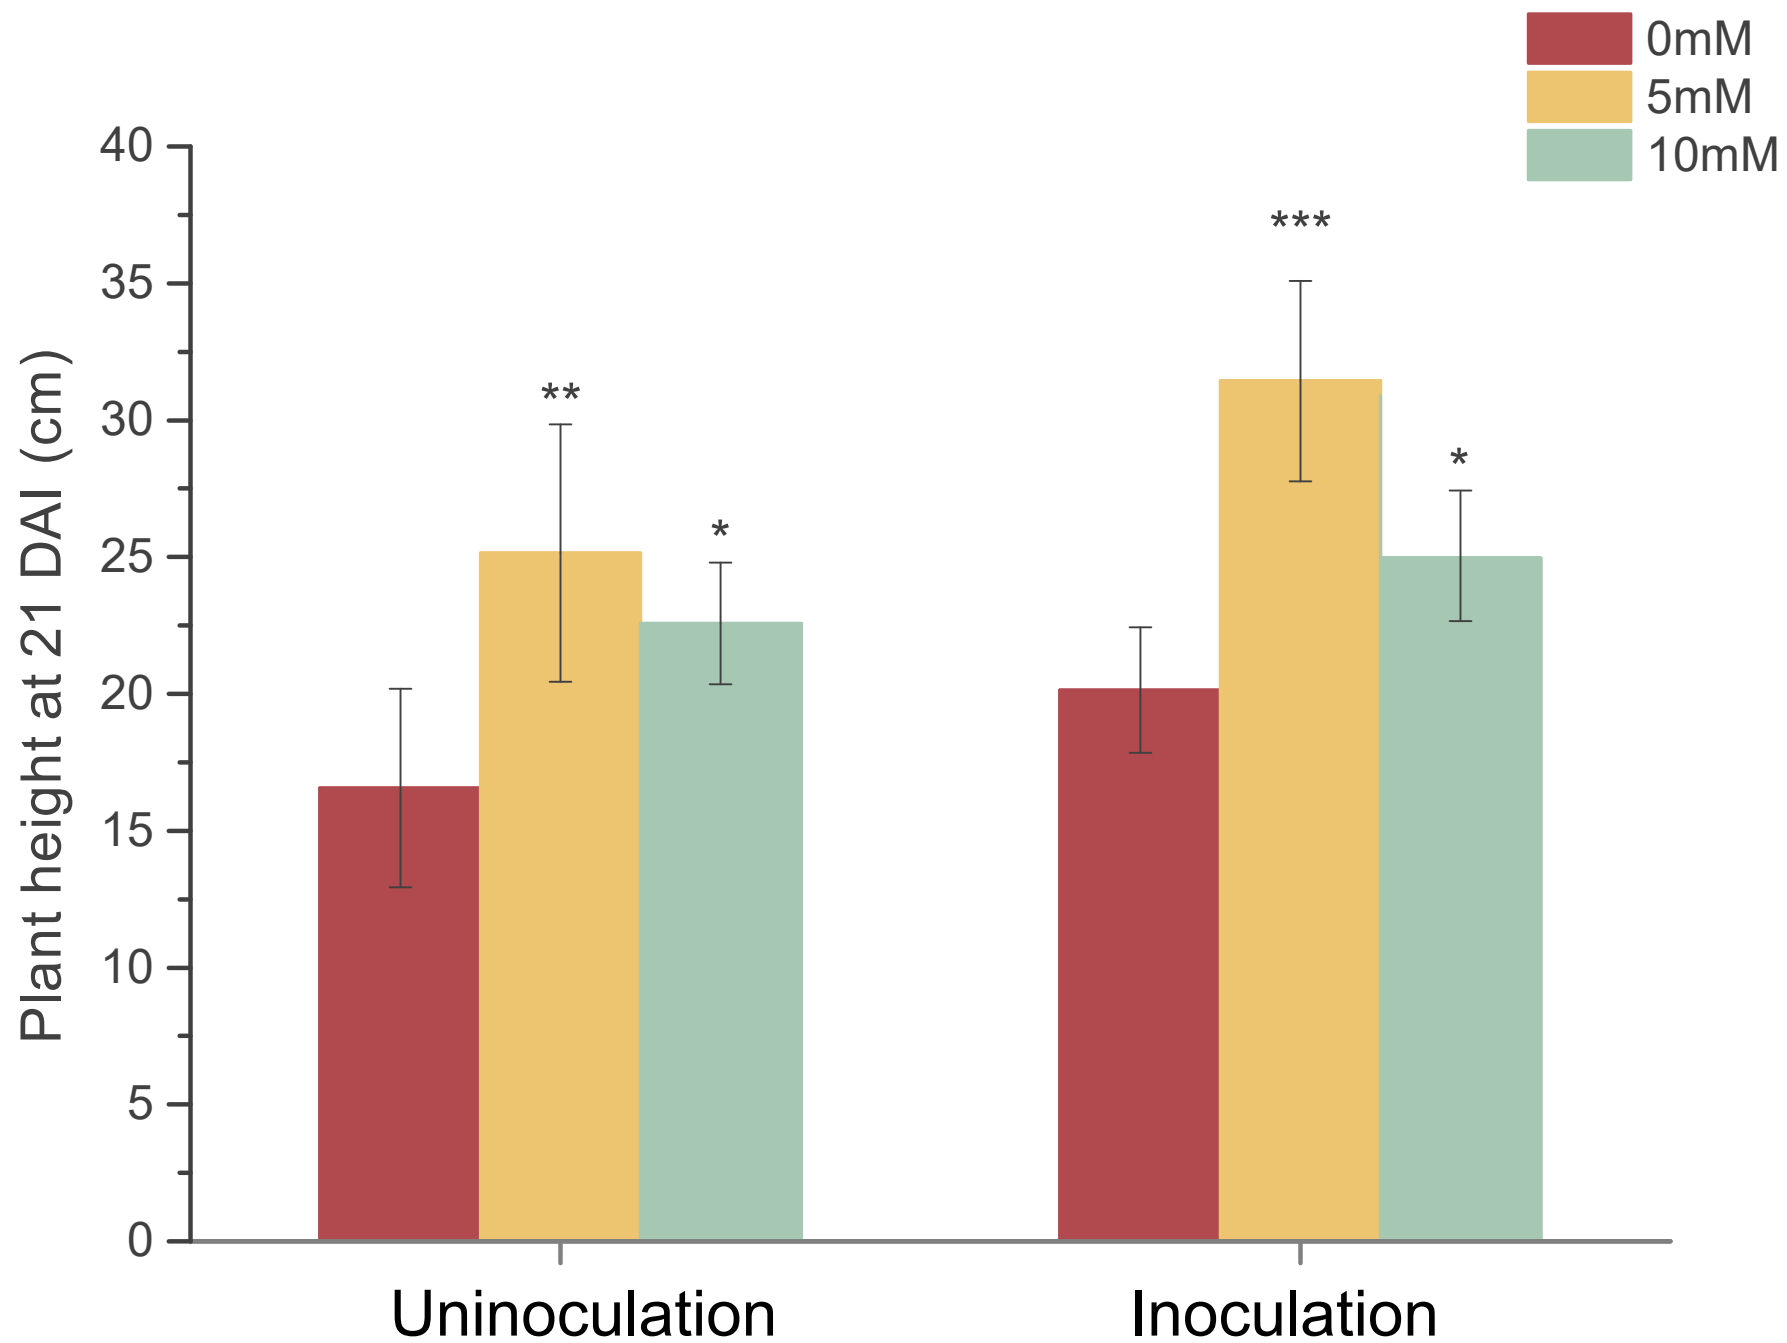

Supplement: s1 [file s1]

A

KCl vs KNO<sub>3</sub>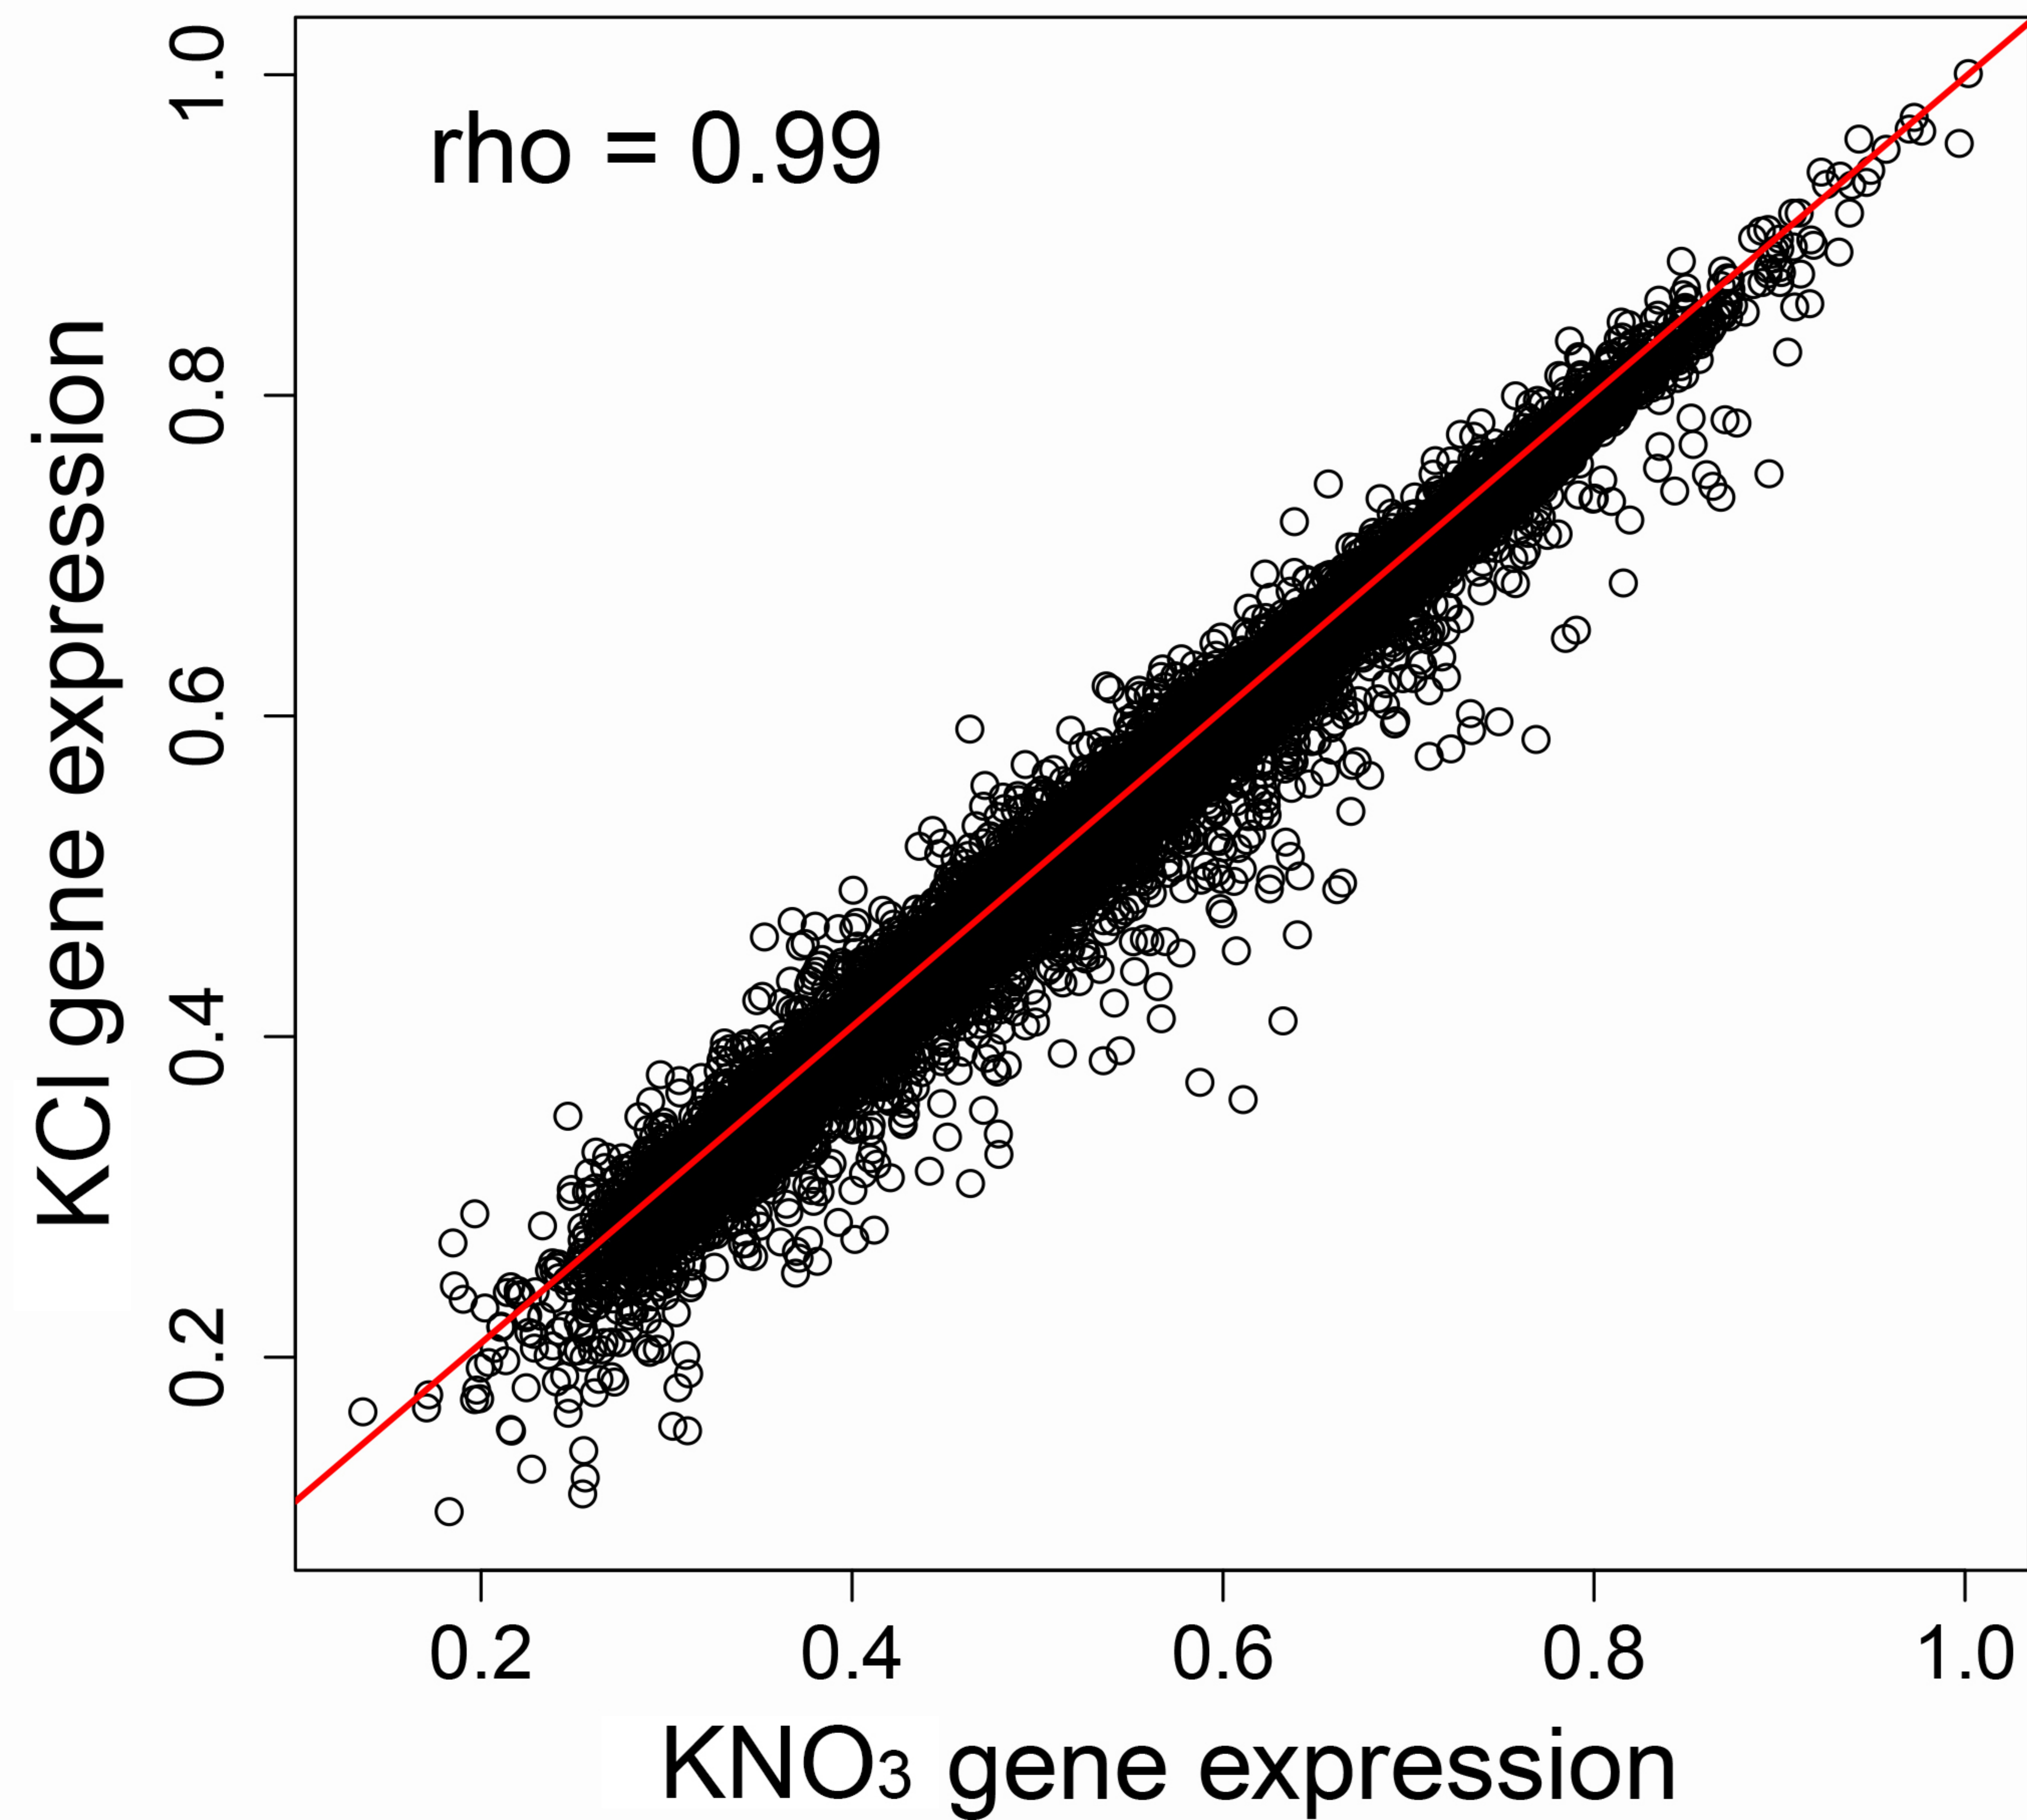

B

KCl vs KNO<sub>3</sub>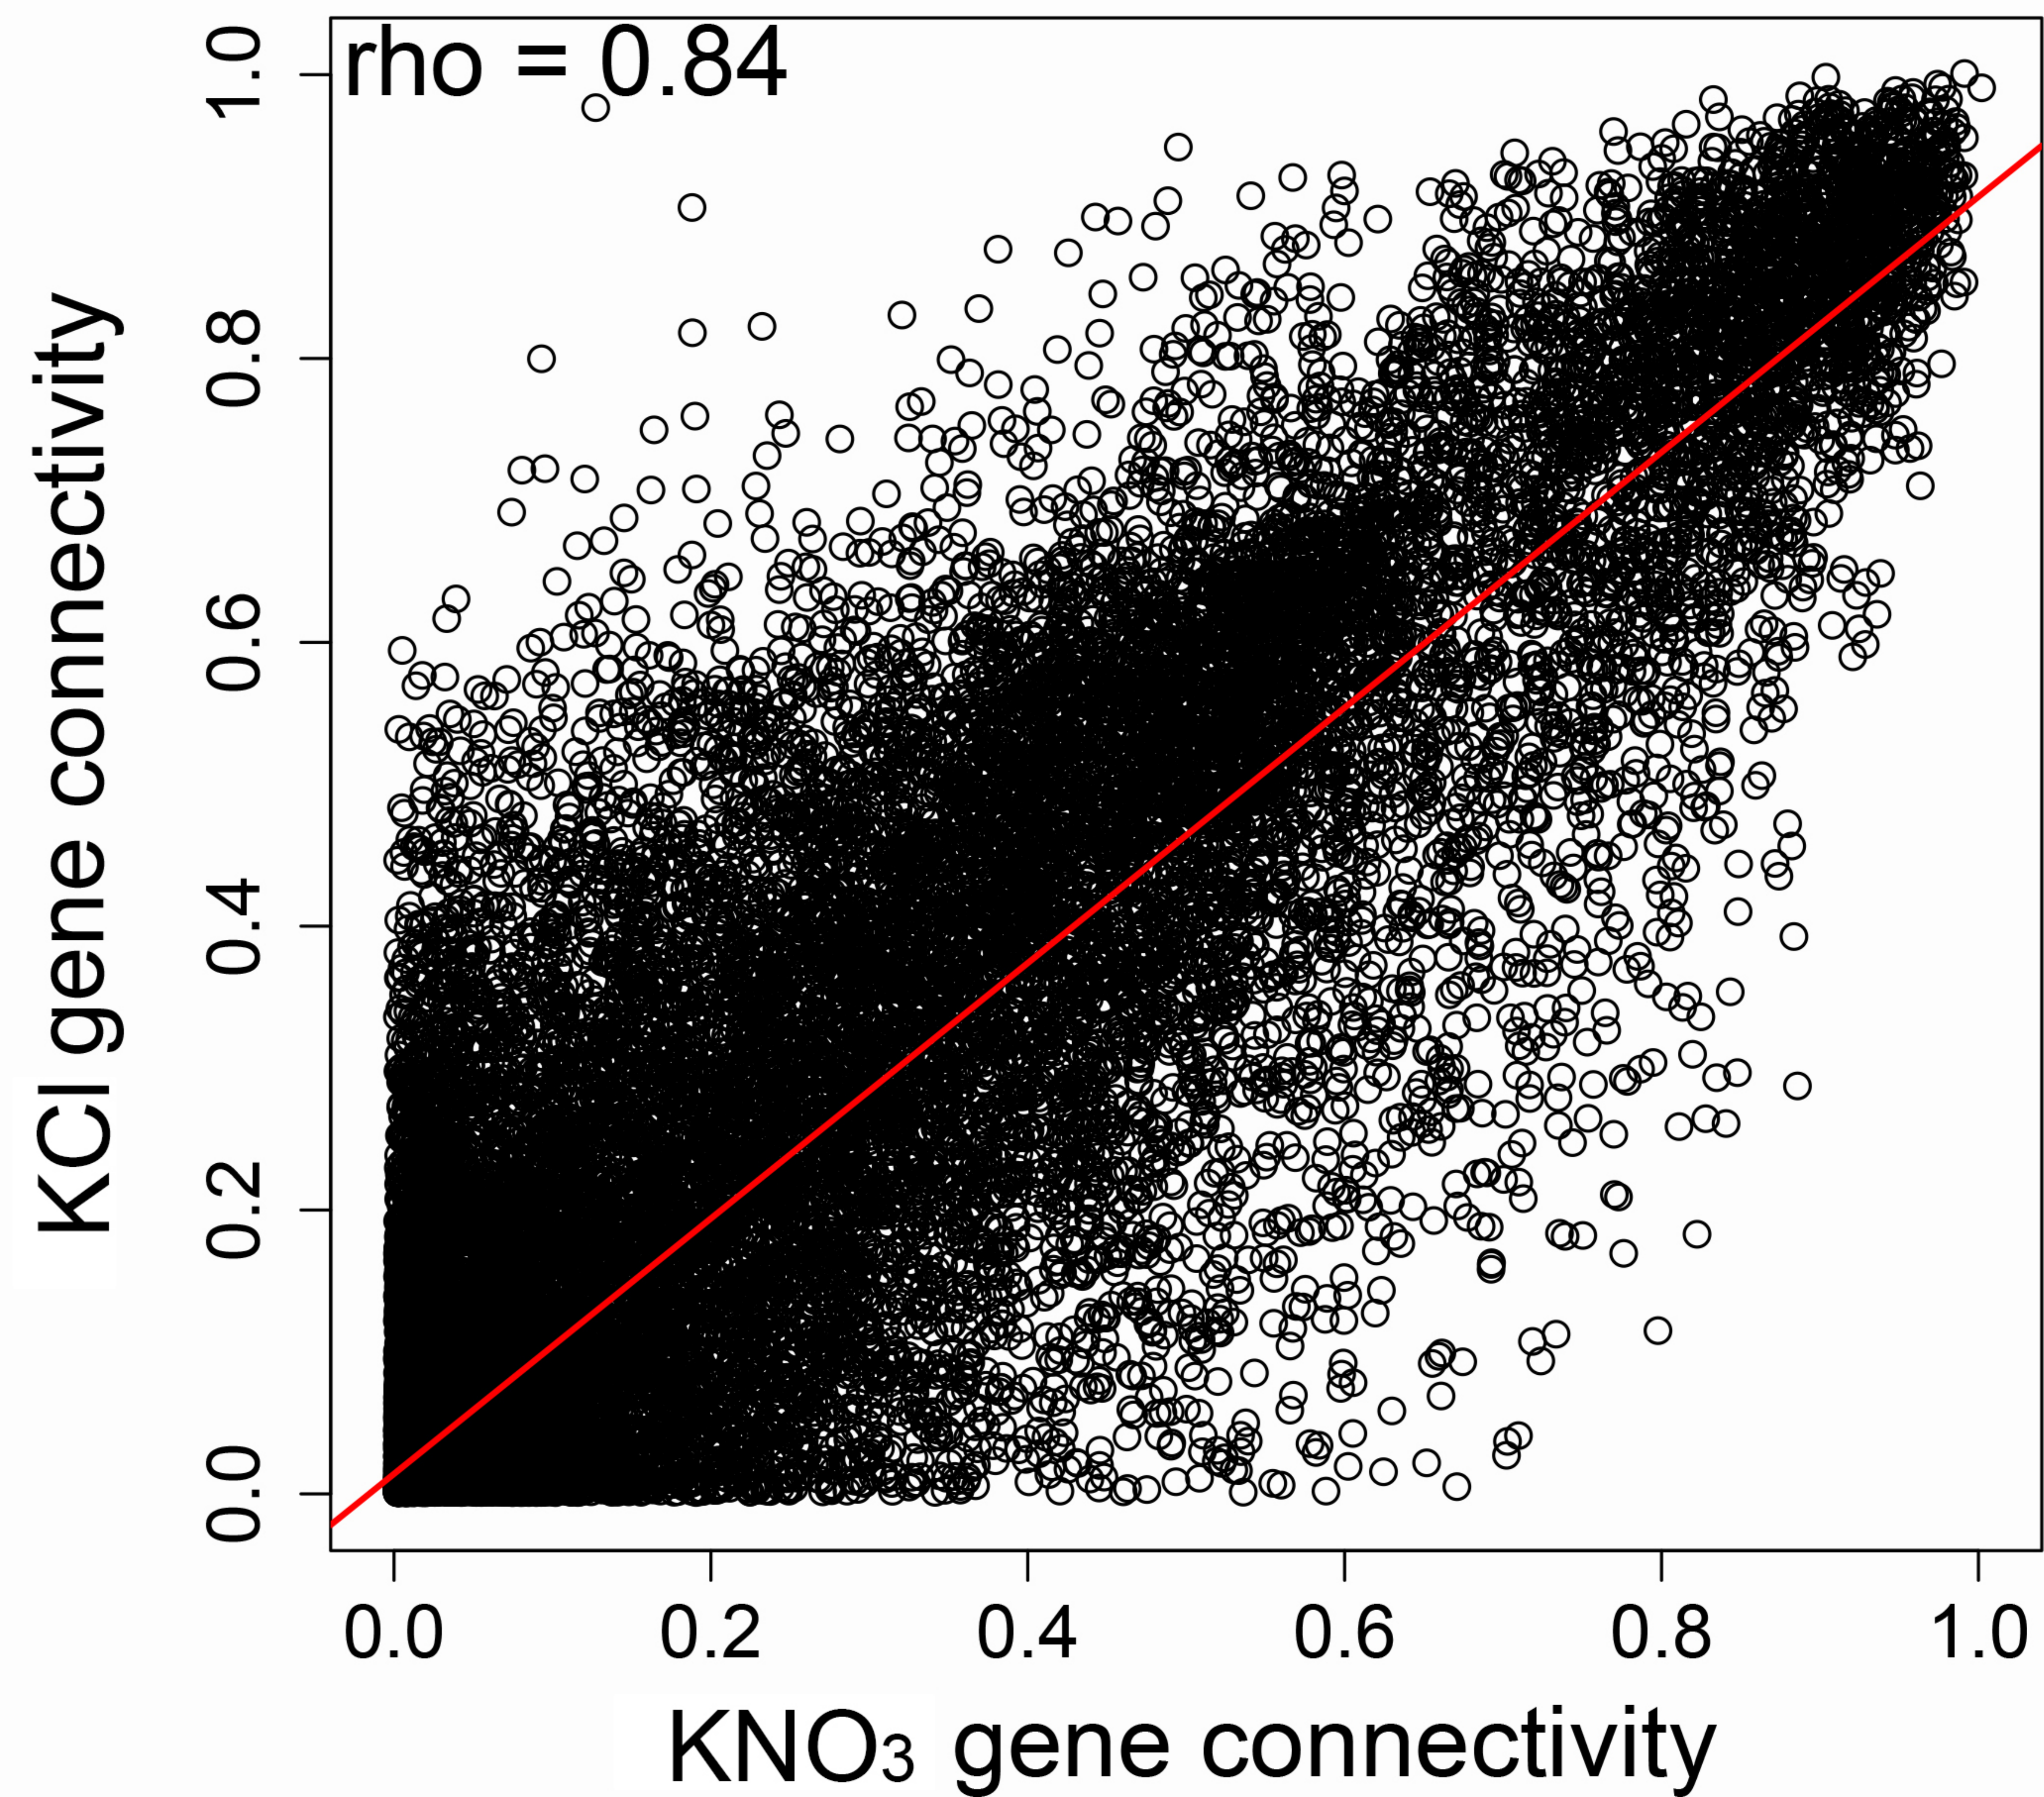

Supplement: s1 [file s1]
